# Supplementary material
Source: publisher figshare collection journal article supplement (https://gsapubs.figshare.com/articles/dataset/_/21397194)
Supplement: Supplementary file 1 [file 1]

## Sheet: Data Set S1
Data Set S1. Single-point major element geochemical data of samples and secondary standards
Analyses of U1345 detrital glass samples and secondary standards are presented by analytical day and the order in which they were analyzed.
Analyses were at the University of Alberta on a JEOL 8900, 5 spectrometer electron microprobe by WDS. Conditions were a 10 micron beam, 6 nA current and 15 KeV, ZAF corrected.
All analyses are normalized to 100 wt.% water-free basis except Lipari obsidian (ID 3506). Individual shards identified as Old Crow tephra by expert assessment are highlighted in red.
Accepted values for secondary standards are from Kuehn et al. (2011) are modified to exclude P2O5 and other major elements (S,F) not analysed in this study.
See Table DR1 for sample information. Ages for U1345 samples are from Cook et al. (2016).
	ID 3506 (Lipari) accepted value	74.1	0.074	13.1	1.55	0.065	0.041	0.73	4.07	5.11	0.34	99.18	unnormalized
	ID3506 1sd	1.4	0.02	0.05	0.05	0.031	0.022	0.06	0.22	0.27	0.05	-
	Old Crow tephra accepted value	75.2893	0.310137	13.0529	1.69166	0.0543002	0.287164	1.49325	3.8219	3.71747	0.281943	100	normalized
	Old Crow 1sd	1.4	0.054	0.3	0.12	0.015	0.022	0.05	0.38	0.28	0.05	-
Analytical Day	SAMPLE	SiO2	TiO2	Al2O3	FeO	MnO	MgO	CaO	Na2O	K2O	Cl	TOTAL	H2O diff	n	Age
Sept 14 2021	ID3506_1	74.1307	0.046828	13.1361	1.58559	0.08621	0.050991	0.717861	3.87161	5.12677	0.282904	98.9717	1.0283
Sept 14 2021	ID3506_2	73.4016	0.075817	13.0775	1.59318	0.07773	0.052049	0.756932	4.0386	5.09941	0.353802	98.4468	1.5532
Sept 14 2021	ID3506_3	73.6957	0.115125	12.8742	1.61911	0.031077	0.073998	0.731148	3.95835	5.07345	0.31054	98.4127	1.5873
Sept 14 2021	ID3506_4	73.2254	0.106716	13.1692	1.56806	0.076265	0.05872	0.713826	4.05177	4.93467	0.311611	98.146	1.854
Sept 14 2021	ID3506_5	73.4899	0.084013	13.1025	1.67689	0.039536	0.042826	0.71789	4.05752	5.03281	0.329	98.4986	1.5014
Sept 14 2021	ID3506_6	73.4738	0.147237	12.9423	1.57298	0.063548	0.032612	0.718313	3.97721	4.9738	0.339362	98.1646	1.8354
	Mean	73.5695	0.095956	13.0503	1.60264	0.0623943	0.051866	0.725995	3.99251	5.04015	0.321203	98.4401	1.55993	6
	StDev	0.313994	0.0348561	0.116309	0.0405956	0.0223579	0.0140715	0.0162641	0.0719446	0.0744391	0.025003	0.299737	0.299737
Sept 14 2021	Old Crow_000	75.2275	0.307554	13.0903	1.72345	0.055904	0.263805	1.45863	3.91023	3.76991	0.248925	100	3.98186
Sept 14 2021	Old Crow_000	74.8893	0.250594	13.3268	1.77455	0.0393232	0.260777	1.49667	3.96769	3.76619	0.294513	100	6.63007
Sept 14 2021	Old Crow_000	75.3676	0.275084	12.8931	1.86993	0.0442196	0.231434	1.50183	3.91974	3.68471	0.274213	100	4.19851
Sept 14 2021	Old Crow_000	75.3269	0.363885	12.9937	1.76782	0.0462471	0.244931	1.47002	3.84592	3.70805	0.300376	100	5.35409
Sept 14 2021	Old Crow_000	75.152	0.310079	13.0618	1.67499	0.0674983	0.262893	1.43084	4.09885	3.70967	0.298771	100	5.85684
Sept 14 2021	Old Crow_000	75.4065	0.323595	13.0597	1.75826	0.0858069	0.295944	1.44297	3.82417	3.60559	0.254931	100	6.22895
	Mean	75.2283	0.305132	13.0709	1.7615	0.0564998	0.259964	1.46683	3.92777	3.70735	0.278621	100	5.37505
	StDev	0.19059	0.0392438	0.143963	0.0646678	0.0174996	0.0217189	0.0284868	0.0986582	0.0604147	0.022779	0	1.08277	6
Sept 14 2021	UA3744-8	57.439	1.75114	15.2192	9.84594	0.176519	3.08418	6.41728	3.67989	2.29535	0.118172	100	2.73292		14.7 ka
Sept 14 2021	UA3744-36	59.8795	1.45477	15.9047	8.25732	0.178727	2.34744	5.43851	4.75967	1.68785	0.118188	100	4.31552
Sept 14 2021	UA3744-11	61.7935	1.08219	16.2911	6.65583	0.213233	1.74573	4.37909	4.93663	2.72717	0.226747	100	4.02086
Sept 14 2021	UA3744-34	62.8487	0.38475	20.6363	2.35612	0.065684	0.496669	6.16695	5.43785	1.55028	0.0732706	100	3.27634
Sept 14 2021	UA3744-49	64.7764	0.997616	16.5591	4.72533	0.177968	1.40053	3.97549	4.64116	2.6376	0.140516	100	4.27905
Sept 14 2021	UA3744-25	64.892	0.97294	15.975	4.95814	0.144045	1.36724	3.56915	5.08033	2.93494	0.137248	100	5.24641
Sept 14 2021	UA3744-26	65.3352	0.962973	16.1227	4.647	0.123601	1.22065	3.3333	5.12785	2.98391	0.184262	100	4.38955
Sept 14 2021	UA3744-42	66.0655	0.820985	15.5079	5.31532	0.194976	1.11774	3.27403	5.23801	2.33783	0.164897	100	3.9676
Sept 14 2021	UA3744-41	66.3038	0.619122	16.501	4.89532	0.0947307	0.918212	3.29411	4.6479	2.63199	0.121063	100	4.82181
Sept 14 2021	UA3744-44	66.3122	0.955366	15.6774	5.30486	0.208063	0.96704	2.90506	5.09441	2.47447	0.130633	100	3.93129
Sept 14 2021	UA3744-16	66.5352	0.792123	15.6313	4.91993	0.180626	0.867123	3.0602	5.32711	2.54098	0.187886	100	3.48775
Sept 14 2021	UA3744-32	66.9623	0.692275	15.7198	5.08527	0.0933628	1.01591	3.47225	4.39243	2.46513	0.130937	100	3.49048
Sept 14 2021	UA3744-17	67.3242	0.731314	15.4961	4.70399	0.216718	0.771185	2.66436	5.53614	2.39945	0.202227	100	4.60601
Sept 14 2021	UA3744-14	67.3244	0.678157	15.7473	4.66378	0.147548	0.793266	2.84951	5.11099	2.54184	0.185039	100	4.68194
Sept 14 2021	UA3744-39	67.9024	0.676339	15.394	4.35282	0.140075	0.753112	2.61549	5.3772	2.64667	0.183224	100	4.40432
Sept 14 2021	UA3744-28	68.1428	1.13635	14.5349	4.37161	0.0789537	0.993897	3.02881	4.23567	3.421	0.0724162	100	3.67904
Sept 14 2021	UA3744-9	68.5852	0.574232	15.3335	4.50839	0.193098	0.582641	2.19944	5.46473	2.43065	0.165347	100	3.15043
Sept 14 2021	UA3744-35	68.7108	0.504676	15.3377	4.3305	0.120979	0.455622	2.00549	5.05858	3.27108	0.264114	100	7.99397
Sept 14 2021	UA3744-50	70.2168	0.641902	14.8647	3.07635	0.126825	0.659843	2.38074	4.86702	3.02801	0.178075	100	4.29026
Sept 14 2021	UA3744-48	70.4469	0.325652	15.4855	2.42001	0.106332	0.377069	1.3997	5.35482	3.90671	0.229018	100	7.02247
Sept 14 2021	UA3744-10	70.7685	0.35668	14.5118	4.14949	0.134466	0.307859	1.98598	4.79312	2.8657	0.163318	100	3.68796
Sept 14 2021	UA3744-24	72.0477	0.629727	14.0279	3.16702	0.0424441	0.738421	2.57192	4.22647	2.43409	0.147675	100	3.57668
Sept 14 2021	UA3744-31	73.2702	0.316785	13.7808	2.26161	0.0693469	0.319412	1.47127	4.42829	3.94417	0.178564	100	6.2654
Sept 14 2021	UA3744-7	73.2746	0.389873	14.6235	2.01318	0.0969418	0.427904	1.79966	5.34006	1.92254	0.144082	100	3.90933
Sept 14 2021	UA3744-22	73.4286	0.280608	13.9349	2.17897	0.0608002	0.267643	1.18999	4.41122	4.0219	0.291019	100	7.07757
Sept 14 2021	UA3744-38	73.4695	0.283291	14.0255	2.06791	0.0710884	0.281615	1.37631	4.38945	3.8562	0.231366	100	6.50379
Sept 14 2021	UA3744-3	73.5161	0.355043	14.0106	2.04374	0.0137758	0.266719	1.38698	4.19313	4.05221	0.208738	100	7.84541
Sept 14 2021	UA3744-33	73.5598	0.302758	14.1656	1.8831	0.0505423	0.295433	1.34789	4.35831	3.88221	0.199447	100	7.65167
Sept 14 2021	UA3744-12	73.5768	0.37586	13.9799	1.94063	0.0516011	0.289087	1.34946	4.25075	4.02295	0.210479	100	6.95747
Sept 14 2021	UA3744-6	73.7162	0.347172	13.8233	1.9108	0.0945136	0.2688	1.32077	4.32592	4.0064	0.240267	100	4.44756
Sept 14 2021	UA3744-19	73.8289	0.334829	14.0954	2.21561	0.122724	0.405228	1.76761	4.88649	2.20631	0.176567	100	4.45753
Sept 14 2021	UA3744-29	73.9463	0.284856	14.008	1.86523	0.0243984	0.258547	1.32524	4.18704	3.95278	0.190709	100	7.28499
Sept 14 2021	UA3744-46	74.4894	0.380559	13.953	1.92825	0.108904	0.29871	1.64483	4.83455	2.22932	0.171109	100	6.44485
Sept 14 2021	UA3744-15	74.6025	0.244677	14.2188	1.62993	0.0478521	0.300122	1.47117	5.06249	2.28064	0.183242	100	8.44919
Sept 14 2021	UA3744-37	74.6544	0.367573	13.2838	1.88667	0.036507	0.298446	1.5213	3.85249	3.89284	0.266012	100	6.97668
Sept 14 2021	UA3744-45	74.6859	0.280731	13.1931	1.96858	0.0443015	0.261439	1.54613	3.99835	3.82046	0.259565	100	4.17485
Sept 14 2021	UA3744-47	74.7157	0.303429	13.1844	1.72111	0.0796617	0.281654	1.55898	4.03365	3.88971	0.299255	100	4.0756
Sept 14 2021	UA3744-23	74.8046	0.335504	13.1908	1.6145	0.062806	0.248037	1.08604	3.85012	4.5139	0.379262	100	7.71742
Sept 14 2021	UA3744-30	74.8528	0.24274	13.9753	1.83153	0.0727695	0.287355	1.40571	5.0261	2.17895	0.163664	100	8.6513
Sept 14 2021	UA3744-18	74.8531	0.325173	14.0844	1.74374	0.06722	0.276316	1.43233	4.84075	2.25736	0.154553	100	7.46797
Sept 14 2021	UA3744-43	74.9273	0.311227	13.3395	1.74329	0.0396454	0.318554	1.46768	3.90385	3.77864	0.220029	100	7.15444
Sept 14 2021	UA3744-1	74.951	0.199578	14.4131	1.26368	0.119755	0.357753	1.3345	4.49496	2.83475	0.0399198	100	6.81571
Sept 14 2021	UA3744-27	75.104	0.25754	13.3191	1.79037	0.0503781	0.2159	1.47665	3.8292	3.75631	0.259074	100	7.38438
Sept 14 2021	UA3744-21	75.2737	0.277272	13.093	1.80631	0.0517358	0.269054	1.48073	3.74591	3.78347	0.28254	100	7.0933
Sept 14 2021	UA3744-40	75.3987	0.244182	14.0803	1.50332	0.0533979	0.308464	1.77759	4.45472	2.05879	0.155754	100	9.7999
Sept 14 2021	UA3744-4	75.8792	0.185273	13.7967	1.57069	0.0835371	0.294766	1.76814	4.29322	2.00395	0.160897	100	8.67408
Sept 14 2021	UA3744-20	76.8927	0.228046	12.9371	1.154	0.0717072	0.263792	1.27761	3.92659	3.10811	0.181065	100	7.2352
Sept 14 2021	UA3744-2	77.5975	0.181835	12.7484	1.08866	0.0726674	0.14155	0.989858	4.12966	2.93597	0.14716	100	8.58903
Sept 14 2021	UA3744-13	77.6591	0.147882	12.7925	1.06998	0.0198534	0.20494	1.09343	4.39505	2.48631	0.169127	100	7.34072
Sept 14 2021	UA3744-5	78.091	0.111404	12.7074	1.05385	0.0680209	0.130849	1.1	4.05072	2.53144	0.200552	100	8.53838	50
Sept 14 2021	UA3749-12	63.6129	0.992988	16.2034	6.09752	0.200849	1.56953	4.08892	5.21467	1.91915	0.129262	100	6.33683		134.2 ka
Sept 14 2021	UA3749-19	64.0159	1.06134	16.0044	5.91268	0.188694	1.45416	3.96984	5.23231	2.03146	0.166859	100	4.02172
Sept 14 2021	UA3749-24	66.0405	0.651713	15.585	4.94806	0.184697	0.772241	2.53721	5.05776	4.07259	0.193952	100	4.13896
Sept 14 2021	UA3749-1	67.5151	0.491545	14.7949	5.6312	0.25152	0.429039	2.54672	5.57859	2.59493	0.21479	100	6.04206
Sept 14 2021	UA3749-3	68.1609	0.583031	15.5342	4.32084	0.166382	0.520283	2.08659	6.08124	2.42596	0.156009	100	6.04125
Sept 14 2021	UA3749-10	68.8486	0.623861	14.9204	4.40431	0.21775	0.54434	1.83081	5.9159	2.53933	0.199677	100	4.33304
Sept 14 2021	UA3749-20	68.8803	0.606424	15.1172	4.09171	0.160371	0.488232	1.87935	5.71755	2.88096	0.229835	100	6.08821
Sept 14 2021	UA3749-5	68.8906	0.629787	15.6979	3.57567	0.0799675	0.715484	2.25835	4.63314	3.34856	0.220277	100	10.1035
Sept 14 2021	UA3749-17	69.1893	0.632827	14.4926	3.86683	0.0667507	0.610357	2.2193	4.8302	3.95446	0.177301	100	2.98824
Sept 14 2021	UA3749-13	70.0692	0.442565	15.0687	3.40554	0.164096	0.406636	1.61164	6.00084	2.6493	0.234336	100	6.40547
Sept 14 2021	UA3749-11	70.1215	0.303783	14.7815	4.07382	0.17767	0.293069	1.47471	5.90571	2.69011	0.230049	100	9.63129
Sept 14 2021	UA3749-25	71.4259	0.564729	13.8145	3.70494	0.0539306	0.407681	1.90755	4.35429	3.65888	0.138989	100	3.34421
Sept 14 2021	UA3749-7	71.6479	0.312642	14.5012	3.50662	0.157279	0.170157	1.26147	5.52912	2.75452	0.205514	100	6.77097
Sept 14 2021	UA3749-16	71.7341	0.185951	14.5511	3.13728	0.0784882	0.227585	1.22774	5.1315	3.50838	0.281476	100	6.6306
Sept 14 2021	UA3749-18	73.3013	0.558769	15.4928	3.54011	0.219603	0.375127	1.65581	1.87928	2.79963	0.229218	100	8.18511
Sept 14 2021	UA3749-21	73.854	0.407754	14.7756	4.09031	0.192921	0.230305	1.53157	2.07237	2.6589	0.240569	100	11.6073
Sept 14 2021	UA3749-23	74.2996	0.338543	14.0592	1.64456	0.113653	0.390595	1.63673	4.70035	2.71396	0.132673	100	6.75884
Sept 14 2021	UA3749-14	74.8231	0.260298	13.0989	1.84065	0.0438846	0.235951	1.14501	3.91742	4.43807	0.254108	100	6.64617
Sept 14 2021	UA3749-6	75.073	0.270235	13.1973	1.69991	0.0708804	0.230527	1.11072	3.767	4.38522	0.25201	100	6.15595
Sept 14 2021	UA3749-4	75.3774	0.282079	13.589	1.55546	0.0336285	0.263432	1.49731	4.63078	2.6439	0.164016	100	7.43269
Sept 14 2021	UA3749-2	76.8802	0.164167	12.6965	1.27915	0.0465912	0.122435	0.803101	4.24454	3.65133	0.144621	100	5.7869
Sept 14 2021	UA3749-15	77.4033	0.0552777	13.2605	0.52675	0.155198	0.0628395	0.660822	3.40481	4.43377	0.0474216	100	7.87961
Sept 14 2021	UA3749-8	77.6677	0.119851	12.8072	1.09471	0.0230123	0.235565	1.01272	4.44545	2.4599	0.172892	100	7.72324
Sept 14 2021	UA3749-9	77.7514	0.208788	12.6862	1.15991	0.0470675	0.203048	1.07112	4.35063	2.38668	0.174471	100	6.75305
Sept 14 2021	UA3749-22	80.2008	0.176785	12.5433	1.20599	0.0679324	0.157243	1.10798	1.94775	2.45732	0.174347	100	8.29112	25
Sept 14 2021	ID3506-7	73.4703	0.050784	13.1947	1.42211	0.073448	0.013008	0.720317	4.05838	5.0244	0.312965	98.2698	1.7302
Sept 14 2021	ID3506-8	74.3372	0.060503	12.841	1.61072	0.035295	0.020808	0.731869	4.17638	5.15234	0.277589	99.1811	0.8189
Sept 14 2021	ID3506-9	73.6687	0.022824	12.9843	1.53171	0.064931	0.055735	0.721169	4.06181	5.00055	0.344953	98.3789	1.6211
Sept 14 2021	ID3506-10	74.2869	0.062083	12.9828	1.54621	0.066311	0.023065	0.753805	4.01744	5.19198	0.299161	99.1622	0.8378
	Mean	73.9408	0.0490485	13.0007	1.52769	0.0599963	0.028154	0.73179	4.0785	5.09232	0.308667	98.748	1.252	4
	StDev	0.436779	0.0181828	0.14575	0.0783162	0.0168852	0.0188854	0.0155895	0.0682939	0.0941088	0.0282333	0.491273	0.491273
Sept 14 2021	Old Crow	75.3161	0.294241	13.1525	1.66294	0.101508	0.281567	1.45311	3.82025	3.69598	0.286401	100	5.50595
Sept 14 2021	Old Crow	75.2377	0.22639	13.0195	1.74494	0.0119607	0.314875	1.496	4.03626	3.70984	0.261584	100	5.70809
Sept 14 2021	Old Crow	75.542	0.374426	12.9776	1.73508	0.0212727	0.231406	1.45652	3.5982	3.86462	0.256865	100	7.26144
Sept 14 2021	Old Crow	75.4196	0.280959	12.9439	1.72087	0.00749331	0.280864	1.53439	3.84442	3.74149	0.291972	100	5.99613
	Mean	75.38	0.29	13.02	1.72	0.04	0.28	1.49	3.82	3.75	0.27	100	6.12	4
	StDev	0.13	0.06	0.09	0.04	0.04	0.03	0.04	0.18	0.08	0.02	0	0.79
Sept 14 2021	UA3749-25	66.6236	0.775432	15.9897	4.85181	0.167279	0.791591	2.84439	5.41739	2.38486	0.198798	100	5.97769		134.2 ka
Sept 14 2021	UA3749-8	67.8513	0.587012	15.2254	4.56868	0.194116	0.629467	2.31566	6.11031	2.40165	0.15022	100	3.98394
Sept 14 2021	UA3749-15	67.8894	0.628039	15.6311	4.41648	0.179406	0.618275	2.1278	6.01563	2.36582	0.165303	100	3.57161
Sept 14 2021	UA3749-21	67.962	0.557629	15.6665	4.3905	0.145848	0.532813	2.58201	5.5732	2.45435	0.174507	100	4.4331
Sept 14 2021	UA3749-28	68.398	0.757966	15.1193	4.51774	0.153399	0.926577	3.10501	5.1913	1.7358	0.122583	100	3.09412
Sept 14 2021	UA3749-5	68.5048	0.749125	15.2347	4.45778	0.175558	0.861161	3.08139	4.97629	1.84201	0.151416	100	3.35834
Sept 14 2021	UA3749-23	69.8463	0.528817	14.7065	3.81593	0.150777	0.339076	1.56636	6.25508	2.65251	0.178867	100	1.92659
Sept 14 2021	UA3749-13	70.0003	0.438488	14.9233	3.78916	0.183785	0.425713	1.7991	5.52196	2.76838	0.193418	100	2.04963
Sept 14 2021	UA3749-7	70.438	0.464935	14.9651	3.31063	0.18182	0.312009	1.51175	5.52296	3.12516	0.216635	100	6.58378
Sept 14 2021	UA3749-19	72.6963	0.196092	14.1882	2.75906	0.110554	0.161866	0.987117	5.07799	3.5834	0.309125	100	6.78373
Sept 14 2021	UA3749-3	72.917	0.230709	14.0757	2.75288	0.105423	0.152605	0.958422	5.08224	3.459	0.343627	100	6.65629
Sept 14 2021	UA3749-18	73.1255	0.0609805	14.1695	2.17368	0.0775207	0.00454687	1.3422	3.24391	5.69471	0.138793	100	8.88236
Sept 14 2021	UA3749-16	73.2508	0.233234	15.6613	1.66969	0.0612677	0.52141	2.16935	4.4454	1.98404	0.00452166	100	7.68879
Sept 14 2021	UA3749-26	74.1494	0.353174	13.9811	1.85472	0.0754712	0.370221	1.69107	4.69266	2.67953	0.197179	100	6.5802
Sept 14 2021	UA3749-17	74.1839	0.352611	13.544	2.03266	0.0586821	0.209659	1.04804	4.05614	4.30161	0.274573	100	6.09396
Sept 14 2021	UA3749-12	74.2167	0.17841	15.1275	1.0935	0.0255921	0.34858	1.70897	4.66738	2.55515	0.101041	100	6.2563
Sept 14 2021	UA3749-2	74.3294	0.290456	13.8865	1.78864	0.108734	0.419697	1.67225	4.64435	2.72745	0.171285	100	6.74757
Sept 14 2021	UA3749-14	74.5523	0.331558	13.285	1.80401	0.03872	0.281109	1.54267	4.14472	3.82392	0.253114	100	5.21188
Sept 14 2021	UA3749-22	75.1345	0.294474	13.2765	1.7565	0.0559306	0.255181	1.48917	3.81639	3.70751	0.276178	100	6.48944
Sept 14 2021	UA3749-29	75.1681	0.2157	14.1515	0.657725	0.0164703	0.0319604	0.590702	4.30504	4.81073	0.0673045	100	5.9335
Sept 14 2021	UA3749-11	75.2223	0.184991	13.8037	1.48599	0.0652708	0.338784	1.71986	3.98805	3.06159	0.167238	100	4.96206
Sept 14 2021	UA3749-1	75.2732	0.354473	12.9704	1.74291	0.0695521	0.264888	1.45946	3.7976	3.86262	0.264517	100	6.84828
Sept 14 2021	UA3749-4	75.488	0.129598	14.2495	0.922073	0.183772	0.174368	1.40812	4.28721	3.08399	0.0947908	100	7.96263
Sept 14 2021	UA3749-20	76.2279	0.209388	12.5302	1.80318	0.0626078	0.116263	0.932099	3.6018	4.33799	0.230588	100	2.85711
Sept 14 2021	UA3749-10	76.635	0.142934	13.4338	1.20376	0.0418417	0.34439	2.04272	3.56839	2.41045	0.228162	100	5.62753
Sept 14 2021	UA3749-9	76.7134	0.117661	13.1592	1.1377	0.0625346	0.127447	0.991435	3.96856	3.50106	0.285361	100	5.34515
Sept 14 2021	UA3749-24	77.0509	0.12318	13.4845	1.06409	0.145082	0.278262	1.42811	3.79191	2.53859	0.123061	100	7.39418
Sept 14 2021	UA3749-30	78.9486	0.190428	12.35	0.591608	0	0.0323308	0.407503	3.4034	4.05199	0.0312617	100	6.74207	28
Sept 14 2021	UA3751-31	54.8363	1.99362	15.8038	10.7542	0.283288	3.36384	7.60043	4.1678	1.1279	0.0887311	100	4.31091		167.7 ka
Sept 14 2021	UA3751-44	60.0799	1.51538	15.6399	8.15388	0.152063	2.24663	5.32216	5.12722	1.68289	0.103323	100	2.46366
Sept 14 2021	UA3751-1	64.1591	1.18237	15.76	6.50327	0.228009	1.37838	3.67119	5.05015	1.97	0.125903	100	3.9856
Sept 14 2021	UA3751-6	64.3039	1.02917	16.0739	5.96325	0.148226	1.39271	3.92173	4.78698	2.27272	0.138748	100	4.36271
Sept 14 2021	UA3751-29	64.541	0.909486	16.028	5.95481	0.20932	1.23562	3.65482	5.12127	2.21464	0.169149	100	4.41229
Sept 14 2021	UA3751-30	65.3714	1.05285	16.0223	6.08316	0.132449	1.45733	4.22111	4.09478	1.4571	0.138985	100	10.7206
Sept 14 2021	UA3751-46	65.5042	0.903857	15.9422	5.66252	0.144404	1.11535	3.2123	5.07691	2.31978	0.153043	100	1.78303
Sept 14 2021	UA3751-12	66.3236	0.636449	15.5454	4.82608	0.183544	0.663023	2.37773	5.16285	4.07574	0.265445	100	3.00864
Sept 14 2021	UA3751-7	66.7483	0.651495	16.2696	4.57867	0.172885	0.71571	2.56769	5.67327	2.46477	0.203515	100	5.88169
Sept 14 2021	UA3751-35	66.8739	0.83121	15.1952	5.22577	0.145157	0.825273	2.64175	5.83026	2.33212	0.128173	100	6.60516
Sept 14 2021	UA3751-28	67.5095	0.683156	15.5136	4.72107	0.209082	0.677299	2.51598	5.73867	2.31143	0.155441	100	4.23611
Sept 14 2021	UA3751-5	67.6441	0.690027	15.3978	4.6248	0.184878	0.677912	2.34566	5.85936	2.44676	0.166245	100	4.28242
Sept 14 2021	UA3751-9	67.774	0.738603	15.6938	4.12802	0.175592	0.892624	2.98608	5.19484	2.29658	0.154767	100	3.31796
Sept 14 2021	UA3751-17	68.1125	0.553021	15.5621	4.40875	0.213981	0.594668	2.05844	5.97607	2.40237	0.152517	100	5.71366
Sept 14 2021	UA3751-36	68.1445	0.655515	15.289	4.54777	0.141628	0.646347	2.32293	5.28571	2.78991	0.228099	100	7.08526
Sept 14 2021	UA3751-10	68.1627	0.638018	15.2381	4.41964	0.207527	0.669046	2.16136	6.00671	2.39204	0.135444	100	6.78759
Sept 14 2021	UA3751-25	68.2706	0.634944	15.4959	4.25532	0.212024	0.57792	1.98953	5.96118	2.46846	0.173159	100	7.01608
Sept 14 2021	UA3751-3	68.3327	0.55749	15.4454	4.34485	0.208737	0.570911	2.06523	6.02737	2.31703	0.168115	100	5.68134
Sept 14 2021	UA3751-18	68.4808	0.615658	15.1983	4.43231	0.217496	0.533911	2.10949	5.82576	2.46769	0.153047	100	4.08475
Sept 14 2021	UA3751-37	68.5294	0.559102	15.3481	4.31343	0.191408	0.548759	2.01604	5.93689	2.43623	0.155836	100	5.55676
Sept 14 2021	UA3751-32	68.5396	0.582912	15.1865	4.43131	0.176059	0.569233	2.0316	5.8855	2.45538	0.183282	100	4.84474
Sept 14 2021	UA3751-23	68.5848	0.524282	15.337	4.32617	0.142057	0.52862	2.07884	5.91907	2.4147	0.186665	100	7.15813
Sept 14 2021	UA3751-41	68.5871	0.558608	15.3725	4.31905	0.180127	0.593893	2.12245	5.52506	2.62942	0.144312	100	6.41024
Sept 14 2021	UA3751-40	68.6168	0.671367	15.3026	4.38497	0.233934	0.551965	2.1312	5.63514	2.33297	0.179502	100	3.38693
Sept 14 2021	UA3751-38	68.6436	0.61619	15.2019	4.13833	0.208808	0.5013	2.10327	6.05417	2.40096	0.169648	100	4.61366
Sept 14 2021	UA3751-26	68.6946	0.644342	15.0776	4.50448	0.187332	0.579181	2.05992	5.57585	2.5644	0.145009	100	7.33158
Sept 14 2021	UA3751-21	69.0338	0.624412	15.3389	4.1985	0.198195	0.540417	2.05329	5.45296	2.43924	0.15532	100	8.14152
Sept 14 2021	UA3751-22	69.1072	0.584605	15.0381	4.07091	0.131098	0.784603	2.99145	5.10868	2.05981	0.159435	100	6.72378
Sept 14 2021	UA3751-39	69.6179	0.622978	14.6712	4.37441	0.14701	0.543143	1.90685	5.50841	2.49981	0.139861	100	6.43876
Sept 14 2021	UA3751-27	70.0725	0.548986	14.9176	3.93365	0.0986916	0.586215	2.5503	4.9927	2.20055	0.127634	100	4.11245
Sept 14 2021	UA3751-42	70.3348	0.603687	14.4754	3.3266	0.0945746	0.45754	1.95671	4.6633	3.92094	0.214952	100	6.23169
Sept 14 2021	UA3751-49	70.4828	0.452008	14.8698	3.34381	0.1292	0.324048	1.52613	5.57828	3.14488	0.192414	100	5.14429
Sept 14 2021	UA3751-20	70.5337	0.575859	14.3644	3.98938	0.123	0.318515	1.54002	4.91608	3.47698	0.209182	100	7.27472
Sept 14 2021	UA3751-2	70.5664	0.414468	14.8342	3.99364	0.165871	0.235491	1.51239	5.63788	2.48834	0.195486	100	8.1082
Sept 14 2021	UA3751-47	70.7204	0.460255	14.7301	3.34093	0.159665	0.318103	1.49366	5.35107	3.22485	0.259547	100	5.5982
Sept 14 2021	UA3751-16	70.7993	0.377957	14.5912	4.12326	0.187474	0.202866	1.53126	5.50678	2.52238	0.203333	100	9.36134
Sept 14 2021	UA3751-4	72.189	0.333628	14.2019	3.40748	0.144871	0.113301	1.08724	5.49879	2.86339	0.207344	100	7.39414
Sept 14 2021	UA3751-48	72.6058	0.283118	14.3313	2.74785	0.0585301	0.152236	1.00408	4.79721	3.84188	0.230034	100	6.02618
Sept 14 2021	UA3751-50	74.4355	0.325558	13.7003	1.81825	0.105058	0.207016	0.962433	4.11802	4.16559	0.209703	100	7.24967
Sept 14 2021	UA3751-33	75.1703	0.392904	13.3149	1.93821	0.0611546	0.33593	1.78229	4.14296	2.71596	0.187776	100	5.891
Sept 14 2021	UA3751-19	75.3935	0.325807	13.0282	1.9006	0.00606549	0.338003	1.95737	4.18477	2.69631	0.218663	100	7.88867
Sept 14 2021	UA3751-15	75.633	0.34393	13.1362	1.84492	0.0346545	0.41768	1.81209	4.021	2.61935	0.177173	100	7.1348
Sept 14 2021	UA3751-14	76.3557	0.127934	13.3883	0.89022	0.0621774	0.152355	0.815038	4.25305	3.88591	0.0896834	100	7.66738
Sept 14 2021	UA3751-8	76.8082	0.115098	13.4713	0.763738	0.169054	0.0920339	0.872572	4.03197	3.59498	0.104711	100	8.16642
Sept 14 2021	UA3751-43	77.1111	0.117255	12.9999	0.876056	0.095481	0.2178	1.21243	4.20682	3.00976	0.198151	100	5.21361
Sept 14 2021	UA3751-24	77.4537	0.240594	12.6219	1.23332	0.0744031	0.202276	1.19431	4.05269	2.80826	0.153031	100	8.09249
Sept 14 2021	UA3751-45	77.7478	0.141493	12.6711	1.12441	0.077077	0.198844	1.09569	4.4217	2.41404	0.139295	100	6.40787
Sept 14 2021	UA3751-11	78.0237	0.205334	12.3527	1.07164	0.0620044	0.18553	1.09589	4.36548	2.4884	0.192697	100	7.41625
Sept 14 2021	UA3751-13	78.0334	0.195933	12.5213	1.15526	0.062549	0.193479	1.11955	4.15123	2.44297	0.160539	100	8.19205
Sept 14 2021	UA3751-34	78.4434	0.102698	12.3435	1.09678	0.0652119	0.191725	1.04993	4.21455	2.37975	0.145321	100	7.23326	50
Sept 14 2021	ID3506_3	74.5459	0.083114	13.4208	1.56886	0.0297431	0.0464463	0.754375	4.20368	5.10863	0.30794	100	0.252647
Sept 14 2021	ID3506_3	74.8792	0.0522203	13.1576	1.56468	0.0185441	0.0579244	0.738633	4.15968	5.12306	0.320749	100	0.965722
Sept 14 2021	ID3506_3	74.3061	0.0803223	12.9736	2.24291	0.0949746	0.0645344	0.932229	3.98596	5.06864	0.32389	100	0.411218
Sept 14 2021	ID3506_3	75.0168	0.0643498	13.0608	1.63069	0.0284254	0.0392025	0.710196	4.0446	5.15737	0.319642	100	0.585522
	Mean	74.687	0.0700016	13.1532	1.75179	0.0429218	0.0520269	0.783858	4.09848	5.11443	0.318055	100	0.553777	4
	StDev	0.321848	0.0144519	0.193572	0.328806	0.0350599	0.0113552	0.100589	0.100622	0.0367346	0.00697929	0	0.306436
Sept 14 2021	Old Crow_3	75.6138	0.260582	13.2053	1.65542	0.0106684	0.247926	1.39856	3.66484	3.73039	0.274489	100	7.24959
Sept 14 2021	Old Crow_3	75.0844	0.343462	13.0394	1.762	0.0904787	0.272687	1.52439	3.9253	3.73913	0.282399	100	4.71461
Sept 14 2021	Old Crow_3	75.1194	0.29916	12.9101	1.77933	0.0473922	0.280832	1.49405	3.87629	3.98364	0.270926	100	4.556
Sept 14 2021	Old Crow_3	75.5568	0.244663	12.8675	1.7435	0.0783792	0.320346	1.4458	3.79058	3.75552	0.254314	100	4.39043
	Mean	75.3436	0.286967	13.0056	1.73506	0.0567296	0.280447	1.4657	3.81425	3.80217	0.270532	100	5.22766	4
	StDev	0.28039	0.0440687	0.151895	0.0550722	0.0356676	0.0300549	0.0552328	0.114115	0.121431	0.0118272	0	1.35444
Sept 14 2021	UA3752-10	62.8048	1.15358	16.5367	5.96635	0.166744	1.95667	5.05689	4.6617	1.57903	0.151918	100	3.07357		201.8 ka
Sept 14 2021	UA3752-4	67.0517	0.740789	15.5787	5.28306	0.176507	0.740914	2.58486	5.36884	2.3005	0.224958	100	2.80009
Sept 14 2021	UA3752-20	67.0996	0.738697	15.7148	4.71979	0.168066	0.801345	2.53961	5.74423	2.34079	0.171893	100	2.8323
Sept 14 2021	UA3752-1	67.6436	0.806662	15.2325	4.88138	0.194365	0.768975	2.3303	5.66196	2.36801	0.144982	100	1.56787
Sept 14 2021	UA3752-18	67.7134	0.608512	15.6544	4.5954	0.178245	0.793825	2.44875	5.47527	2.38404	0.191309	100	2.84061
Sept 14 2021	UA3752-31	67.9967	0.654383	15.5255	4.47245	0.190921	0.581571	2.33131	5.59924	2.52603	0.157383	100	6.51679
Sept 14 2021	UA3752-33	68.0258	0.659878	15.2599	4.78891	0.153834	0.595492	2.55631	5.34526	2.48816	0.163308	100	2.42777
Sept 14 2021	UA3752-49	68.0732	0.804914	14.9729	4.966	0.241695	0.695367	2.32163	5.52624	2.29897	0.127983	100	2.35987
Sept 14 2021	UA3752-13	68.1466	0.595836	15.1892	4.54479	0.159813	0.64433	2.31483	5.9916	2.27829	0.174054	100	2.20846
Sept 14 2021	UA3752-25	68.2312	0.686361	15.56	4.35713	0.170449	0.519667	2.10375	5.7063	2.52075	0.186583	100	2.47908
Sept 14 2021	UA3752-42	68.4332	0.506895	15.767	4.18042	0.198662	0.595332	1.92734	5.6992	2.47115	0.28519	100	10.3367
Sept 14 2021	UA3752-47	68.4707	0.52813	15.6926	4.21533	0.155431	0.547537	2.0448	5.72138	2.49227	0.170229	100	5.20099
Sept 14 2021	UA3752-7	68.7488	0.7974	15.6064	5.40842	0.216219	0.807135	2.64027	3.34602	2.28498	0.186228	100	3.69538
Sept 14 2021	UA3752-40	68.8588	0.602761	15.3493	4.19441	0.169827	0.557837	2.05591	5.63046	2.47016	0.14278	100	5.57737
Sept 14 2021	UA3752-27	68.8604	0.530469	15.3377	4.25431	0.16232	0.602419	1.94163	5.62554	2.55759	0.164734	100	2.78832
Sept 14 2021	UA3752-46	69.0227	0.498886	14.9068	4.40658	0.153772	0.465514	2.10811	5.19115	3.09582	0.194634	100	8.69169
Sept 14 2021	UA3752-21	69.0654	0.637736	15.2198	4.22982	0.190954	0.551517	2.08923	5.59288	2.31291	0.141808	100	1.84375
Sept 14 2021	UA3752-5	69.5061	0.467639	16.1913	1.94547	0.119911	0.317603	0.706065	6.18781	4.49703	0.0788965	100	4.63841
Sept 14 2021	UA3752-28	69.7382	0.478131	15.0762	3.78335	0.114839	0.420174	1.7706	5.79893	2.65775	0.208983	100	4.28108
Sept 14 2021	UA3752-37	69.8078	0.565902	14.4449	4.1347	0.152214	0.486865	1.69157	5.79909	2.81223	0.135166	100	5.32307
Sept 14 2021	UA3752-41	70.4021	0.45337	15.176	3.21266	0.202478	0.356506	1.50981	5.78036	2.73466	0.222169	100	7.01298
Sept 14 2021	UA3752-39	70.5183	0.520045	14.5669	3.84879	0.148825	0.380089	1.69682	5.32858	2.82609	0.213663	100	6.14087
Sept 14 2021	UA3752-19	71.5295	0.401644	14.2768	2.81211	0.0417849	0.332737	1.3311	4.42172	4.64904	0.263012	100	5.40598
Sept 14 2021	UA3752-8	71.9995	0.255203	14.3179	3.43453	0.142587	0.109409	1.0737	5.76856	2.75359	0.187377	100	6.01746
Sept 14 2021	UA3752-29	72.0567	0.249296	14.112	3.54127	0.154859	0.15872	1.10511	5.53321	2.91298	0.227153	100	6.24474
Sept 14 2021	UA3752-26	74.1676	0.275726	13.442	2.06042	0.0825401	0.191692	1.01347	4.23533	4.35692	0.225057	100	5.80093
Sept 14 2021	UA3752-24	74.274	0.333372	13.5149	1.90818	0.0747408	0.190058	1.04625	4.32297	4.19286	0.184233	100	5.40507
Sept 14 2021	UA3752-43	74.5213	0.255347	13.4596	2.06275	0.0912707	0.206004	0.992976	4.13124	4.10367	0.227113	100	6.70066
Sept 14 2021	UA3752-23	74.6938	0.297454	13.3388	1.78271	0.037396	0.236058	1.14495	3.78991	4.47799	0.259694	100	5.44701
Sept 14 2021	UA3752-48	74.701	0.292058	13.475	1.68424	0.0665393	0.20622	1.0814	4.04296	4.27547	0.226158	100	7.74322
Sept 14 2021	UA3752-50	74.7317	0.370168	13.3344	1.63188	0.00593743	0.201907	1.14385	3.84416	4.55989	0.227399	100	6.01988
Sept 14 2021	UA3752-16	74.893	0.275412	13.2084	1.70594	0.0614311	0.197455	1.14525	3.90324	4.42225	0.242226	100	5.61126
Sept 14 2021	UA3752-35	75.0687	0.251583	13.3162	1.58865	0.0166355	0.171755	1.10924	3.88959	4.3354	0.325867	100	6.96385
Sept 14 2021	UA3752-38	75.2403	0.250495	13.1377	1.69511	0.0469213	0.198233	1.09134	3.85589	4.29312	0.246431	100	7.31924
Sept 14 2021	UA3752-3	75.7051	0.133316	13.3757	1.675	0.0824544	0.0574216	0.596524	3.04106	5.23279	0.130058	100	7.38153
Sept 14 2021	UA3752-22	75.7624	0.143552	14.1956	0.780203	0.191764	0.134672	1.31816	4.22532	3.16674	0.105311	100	6.92935
Sept 14 2021	UA3752-32	75.9831	0.16242	13.6562	0.909293	0.0390456	0.137802	0.824883	4.30861	3.90941	0.0894142	100	5.9612
Sept 14 2021	UA3752-17	76.2099	0.0954344	13.6915	0.844323	0.0211622	0.127488	0.784253	4.30305	3.84465	0.101146	100	6.29061
Sept 14 2021	UA3752-9	76.4083	0.0803935	13.1367	1.16499	0.0399589	0.061402	0.864665	2.92388	5.27722	0.054824	100	4.34669
Sept 14 2021	UA3752-15	76.812	0.083618	12.4602	1.04634	0.00603506	0.0117152	0.659488	2.91813	5.94009	0.0804465	100	6.16498
Sept 14 2021	UA3752-11	77.0287	0.103479	13.1447	0.816432	0.141421	0.089484	0.835119	3.99152	3.73547	0.146927	100	6.86151
Sept 14 2021	UA3752-36	77.1708	0.228867	12.5168	1.29686	0.0344826	0.11992	0.812903	4.03966	3.66127	0.153014	100	6.15266
Sept 14 2021	UA3752-44	77.2252	0.0294246	13.3598	0.825775	0.082336	0.0750532	0.875238	3.79566	3.63552	0.123943	100	8.26368
Sept 14 2021	UA3752-30	77.7771	0.244688	12.6709	1.10907	0.0651779	0.157038	1.06243	4.38111	2.40721	0.161737	100	6.66615
Sept 14 2021	UA3752-34	78.2155	0.190879	12.431	1.07682	0.0762734	0.179154	1.05636	4.25162	2.39621	0.163021	100	5.70629
Sept 14 2021	UA3752-6	78.3707	0.131145	12.376	1.08198	0.0474887	0.202914	1.10146	4.0969	2.46947	0.157416	100	7.53801
Sept 14 2021	UA3752-45	78.389	0.20417	12.4242	1.09255	0.0654871	0.183309	1.04976	4.05748	2.41155	0.158216	100	8.19115
Sept 14 2021	UA3752-14	78.3937	0.161474	12.3385	1.04249	0.0903973	0.173144	1.05087	4.1593	2.45623	0.172903	100	5.97834
Sept 14 2021	UA3752-2	78.4344	0.167192	12.3054	1.0938	0.0574577	0.178518	0.997681	4.31908	2.32973	0.150874	100	6.34844
Sept 14 2021	UA3752-12	78.4976	0.213639	12.1833	1.06448	0.0723388	0.162124	1.07047	4.19189	2.4286	0.149338	100	6.00205	50
Sept 14 2021	UA3754-3	62.5933	1.08859	15.7899	6.49621	0.251354	1.78639	4.55198	5.43967	1.89815	0.134845	100	4.09019		219.8 ka
Sept 14 2021	UA3754-10	66.227	0.744677	14.8473	6.11973	0.179762	0.745876	3.11713	5.50205	2.34759	0.218069	100	3.07507
Sept 14 2021	UA3754-4	68.2404	0.794883	15.3595	4.11767	0.189358	0.843164	2.73144	5.15957	2.40964	0.199301	100	4.50832
Sept 14 2021	UA3754-8	68.6663	0.432729	17.1204	3.11093	0.10946	0.237789	3.44088	5.47709	1.3172	0.112853	100	6.79919
Sept 14 2021	UA3754-2	69.3701	0.552961	15.0583	4.23672	0.203756	0.520723	1.89424	5.55354	2.47191	0.177973	100	5.17498
Sept 14 2021	UA3754-6	70.9692	0.408253	14.5231	3.75999	0.139808	0.262639	1.59535	5.34953	2.79633	0.252755	100	6.29155
Sept 14 2021	UA3754-9	73.4004	0.418895	14.7051	2.23671	0.0916797	0.53579	1.96918	4.87631	1.67665	0.115335	100	8.29154
Sept 14 2021	UA3754-5	74.3084	0.294288	13.495	2.16569	0.0491072	0.157615	1.02596	3.9969	4.30881	0.25591	100	6.17466
Sept 14 2021	UA3754-12	74.4019	0.317404	13.3636	1.95478	0	0.16688	1.05483	4.07238	4.4817	0.240941	100	6.24568
Sept 14 2021	UA3754-1	74.8946	0.3331	13.3301	1.71827	0.031782	0.221118	1.15741	3.83425	4.29526	0.237616	100	7.82819
Sept 14 2021	UA3754-11	78.0239	0.214784	12.7247	1.06663	0.0487969	0.183898	1.03122	4.15096	2.4378	0.15179	100	7.78307
Sept 14 2021	UA3754-7	78.2023	0.149923	12.5947	1.13026	0.0777051	0.175236	1.05104	4.1498	2.35964	0.141382	100	8.01382	12
Sept 14 2021	ID3506_15	74.3739	0.06329	12.9213	1.4079	0.021093	0.049952	0.717208	3.98953	5.19108	0.262702	98.9388	1.0612
Sept 14 2021	ID3506_16	74.0869	0.067918	12.8037	1.51244	0.077373	0.018063	0.731388	4.01765	5.06835	0.316263	98.6286	1.3714
Sept 14 2021	ID3506_17	73.6666	0.062712	12.8905	1.55681	0.042238	0.051217	0.750676	3.86603	5.24187	0.26195	98.3315	1.6685
Sept 14 2021	ID3506_18	74.3476	0.104077	13.3102	1.56906	0.07325	0.042943	0.772606	4.20451	5.21417	0.301938	99.8722	0.1278
Sept 14 2021	ID3506_19	74.4537	0.10311	13.3159	1.54726	0.073299	0.04436	0.722775	4.13947	5.20406	0.320043	99.8517	0.1483
Sept 14 2021	ID3506_20	74.0211	0.053058	13.2345	1.628	0.066279	0.029053	0.732538	4.0962	5.14721	0.267759	99.2153	0.7847
	Mean	74.1583	0.0756942	13.0793	1.53691	0.058922	0.0392647	0.737865	4.05223	5.17779	0.288442	99.1397	0.860317	6
	StDev	0.295049	0.0221471	0.232356	0.0735887	0.0224319	0.0130412	0.0204734	0.120442	0.0619818	0.0273749	0.633086	0.633086
Sept 14 2021	Old Crow_4	75.2833	0.278518	13.0126	1.71364	0.0821577	0.273868	1.44886	3.88529	3.80492	0.280097	100	3.7996
Sept 14 2021	Old Crow_4	75.3647	0.295317	12.7942	1.76428	0.0663821	0.236044	1.4567	3.98908	3.82558	0.268438	100	4.28895
Sept 14 2021	Old Crow_4	75.5389	0.271426	12.7444	1.73606	0.0836196	0.284058	1.43551	3.87723	3.82035	0.269204	100	3.74388
Sept 14 2021	Old Crow_4	75.6165	0.339282	12.7723	1.66634	0.0653412	0.280411	1.44922	3.73753	3.84562	0.293538	100	4.8976
Sept 14 2021	Old Crow_4	75.69	0.318097	12.7256	1.56115	0.0491074	0.29873	1.52019	3.6444	3.95821	0.302987	100	5.07946
	Mean	75.4987	0.300528	12.8098	1.68829	0.0693216	0.274622	1.4621	3.8267	3.85094	0.282853	100	4.3619	6
	StDev	0.170651	0.0281472	0.116357	0.0796013	0.0141624	0.0234125	0.0333594	0.135591	0.0617068	0.015176	0	0.61346
Sept15_2021	ID3506_001	74.8205	0.067629	13.0296	1.54921	0.062464	0.054502	0.738818	4.1369	5.19399	0.370127	99.9402	0.0598
Sept15_2021	ID3506_001	74.71	0.12347	13.2124	1.63887	0.07632	0.032283	0.696914	4.05767	5.1177	0.346295	99.9338	0.0662
Sept15_2021	ID3506_001	74.879	0.029797	13.2669	1.55966	0.06243	7.8e-05	0.769639	4.04526	5.22496	0.304835	100.074	-0.074
Sept15_2021	ID3506_001	74.4787	0.100216	13.2005	1.63475	0.047132	0.020832	0.752837	4.47972	5.16625	0.357188	100.157	-0.157
Sept15_2021	ID3506_001	74.5605	0.051263	13.0236	1.5014	0.069277	0.040459	0.758815	4.00118	5.1606	0.326117	99.4196	0.5804
Sept15_2021	ID3506_001	74.2628	0.116765	13.1919	1.5401	0.055374	0.030388	0.722466	4.03636	5.13298	0.340258	99.3526	0.6474
	Mean	74.6186	0.0815233	13.1541	1.57067	0.0621662	0.029757	0.739915	4.12618	5.16608	0.340803	99.8129	0.187133	6
	StDev	0.230854	0.0377764	0.102211	0.0549037	0.0102295	0.0184072	0.0266926	0.178908	0.0392737	0.0231006	0.341749	0.341749
Sept15_2021	Old Crow_001	78.0106	0.0454664	13.4657	1.7694	0.0642921	0.287269	1.56918	4.20072	0.331594	0.330436	100	7.38216
Sept15_2021	Old Crow_001	76.7653	0.228294	13.2099	1.77775	0.0245681	0.318297	1.47996	3.96556	2.0083	0.286823	100	4.27031
Sept15_2021	Old Crow_001	75.7107	0.292634	13.0766	1.68855	0.0624229	0.276168	1.47826	3.72392	3.4768	0.276338	100	4.81532
Sept15_2021	Old Crow_001	75.8071	0.31095	12.8898	1.67367	0.0476683	0.286855	1.45944	3.78323	3.54754	0.250137	100	4.40807
Sept15_2021	Old Crow_001	75.3284	0.364705	12.9923	1.71141	0.053243	0.301259	1.48493	3.84415	3.72021	0.257623	100	4.10384
Sept15_2021	Old Crow_001	75.0455	0.347813	13.0177	1.76076	0.0549676	0.24956	1.50151	3.86087	3.9124	0.321372	100	4.64936
	Mean	76.1113	0.264977	13.1087	1.73026	0.0511937	0.286568	1.49555	3.89641	2.83281	0.287122	100	4.93817	6
	StDev	1.0988	0.117658	0.204176	0.0447552	0.0144045	0.0232418	0.0385103	0.169671	1.40103	0.0328743	0	1.22431
Sept15_2021	UA 3754-38	56.9231	1.95386	16.1186	9.26664	0.255303	2.91378	6.74049	4.52166	1.22145	0.109964	100	3.26514		219.8 ka
Sept15_2021	UA 3754-39	59.3206	1.68959	15.4385	9.09585	0.208328	2.2728	5.38367	4.63773	1.82878	0.160363	100	2.50363
Sept15_2021	UA 3754-21	64.082	0.846041	16.361	5.65695	0.190694	1.14491	3.33285	4.87435	3.40817	0.133128	100	1.64023
Sept15_2021	UA 3754-15	65.4919	0.759475	16.9522	4.34188	0.0838918	0.729732	3.69292	5.90991	1.9625	0.0977533	100	1.43969
Sept15_2021	UA 3754-3	66.3266	0.904085	15.2099	5.3967	0.20487	1.01891	2.96517	5.42673	2.43216	0.148256	100	2.35651
Sept15_2021	UA 3754-14	67.389	0.557863	15.1556	4.68375	0.172531	0.535046	2.08678	5.03301	4.21154	0.225914	100	5.8772
Sept15_2021	UA 3754-27	68.3339	0.602266	15.3082	4.63431	0.178363	0.637394	2.20023	5.62386	2.36057	0.156187	100	2.38289
Sept15_2021	UA 3754-34	68.494	0.56847	15.3048	4.45134	0.156938	0.625304	2.08	5.87568	2.34632	0.125611	100	4.02878
Sept15_2021	UA 3754-23	68.7857	0.52224	15.1453	4.19537	0.188538	0.436286	1.97837	5.80868	2.76203	0.229249	100	2.48466
Sept15_2021	UA 3754-33	69.2839	0.96324	14.4851	4.02296	0.0699815	0.872714	2.49274	4.0838	3.6925	0.0426431	100	1.19386
Sept15_2021	UA 3754-40	69.3239	0.603352	15.0764	3.93416	0.177894	0.65231	2.04932	5.33783	2.67706	0.216736	100	2.10326
Sept15_2021	UA 3754-35	69.3535	0.518583	15.2964	3.95978	0.245339	0.42728	1.85496	5.6974	2.4728	0.224622	100	5.90961
Sept15_2021	UA 3754-28	69.8294	0.530197	15.1587	3.97792	0.199321	0.356216	1.78776	5.42721	2.59527	0.178204	100	5.65206
Sept15_2021	UA 3754-25	70.7564	0.504199	14.8884	3.37624	0.154003	0.401661	1.56129	5.48659	2.70268	0.217687	100	6.52643
Sept15_2021	UA 3754-11	71.095	0.459446	14.961	3.30568	0.140074	0.360269	1.53847	5.44759	2.52958	0.210306	100	6.61262
Sept15_2021	UA 3754-2	72.0251	0.386383	13.8485	3.43688	0.168936	0.184222	1.41459	5.21081	3.15373	0.22062	100	5.59823
Sept15_2021	UA 3754-19	74.2813	0.276923	13.346	1.97704	0.0523391	0.172357	1.04503	4.13052	4.50016	0.281869	100	7.28915
Sept15_2021	UA 3754-30	74.3782	0.373805	13.5431	1.95184	0.0437781	0.175912	0.993089	4.06543	4.25763	0.280599	100	4.95018
Sept15_2021	UA 3754-4	74.4267	0.32905	13.471	1.94161	0.0292738	0.171037	1.02118	4.09638	4.35651	0.202955	100	5.89203
Sept15_2021	UA 3754-10	74.5107	0.260903	13.3637	1.98219	0.039458	0.169864	0.999037	4.17047	4.31208	0.247327	100	5.62874
Sept15_2021	UA 3754-9	74.6331	0.299772	13.3629	2.02	0.048662	0.162261	1.01426	3.8841	4.36733	0.268217	100	6.47519
Sept15_2021	UA 3754-18	74.8315	0.311142	13.2557	1.78442	0.0424757	0.195271	1.14972	3.89175	4.36217	0.22704	100	5.36005
Sept15_2021	UA 3754-29	75.0585	0.319144	13.0103	1.69794	0.0683342	0.216924	1.12638	3.94069	4.36804	0.250259	100	4.54708
Sept15_2021	UA 3754-36	75.4879	0.0471558	13.5093	1.2386	0.0984518	0.0498471	1.01829	3.03693	5.44843	0.0842011	100	5.51315
Sept15_2021	UA 3754-17	76.5778	0.114809	13.5677	1.34234	0.0655086	0.0189818	0.506914	3.34239	4.43	0.0433564	100	6.85798
Sept15_2021	UA 3754-32	77.6815	0.16072	13.0501	0.933478	0.104717	0.190228	1.2438	4.0964	2.47574	0.0816512	100	4.42024
Sept15_2021	UA 3754-24	77.9166	0.180156	12.6886	1.15671	0.0476807	0.209614	1.04168	4.14954	2.48154	0.165128	100	6.66044
Sept15_2021	UA 3754-6	77.9444	0.180531	12.5919	1.08924	0.0204541	0.167582	1.01673	4.43449	2.43103	0.159779	100	5.52973
Sept15_2021	UA 3754-13	78.0197	0.21881	12.6403	0.879544	0	0.13494	0.772701	3.8189	3.49815	0.0219193	100	5.52601
Sept15_2021	UA 3754-16	78.0438	0.196549	12.5856	1.06891	0.0283024	0.200704	1.08569	4.20802	2.45297	0.167322	100	6.88783
Sept15_2021	UA 3754-5	78.0512	0.16395	12.6162	1.13415	0.0558471	0.182524	1.07497	4.17225	2.41331	0.17504	100	6.09713
Sept15_2021	UA 3754-1	78.1221	0.190958	12.523	1.17025	0.106575	0.205879	1.21365	3.74075	2.62812	0.127443	100	6.71428
Sept15_2021	UA 3754-31	78.1531	0.214668	12.5478	1.07173	0.0633378	0.150575	1.06965	4.21173	2.41146	0.136773	100	5.63145
Sept15_2021	UA 3754-20	78.4384	0.193426	12.3274	1.07447	0.0732746	0.160612	0.988096	4.09975	2.52574	0.153431	100	7.04554
Sept15_2021	UA 3754-7	78.5106	0.211782	12.1581	1.12796	0.0292668	0.166736	1.04155	4.31087	2.32178	0.156783	100	5.64381
Sept15_2021	UA 3754-37	78.5367	0.139891	12.4988	1.03276	0	0.179913	1.04127	4.0831	2.37334	0.147501	100	7.53401
Sept15_2021	UA 3754-26	78.8744	0.186557	12.1139	1.13325	0.0311993	0.142333	1.0684	4.02468	2.29167	0.17252	100	6.41445	37
Sept15_2021	UA 3755-23	63.5548	1.02995	15.5989	6.5704	0.251396	1.43376	3.96681	5.19578	2.24978	0.191784	100	3.14769		238.2 ka
Sept15_2021	UA 3755-12	67.0868	0.734539	15.7179	4.81989	0.149809	0.81115	2.76175	5.48194	2.31658	0.154634	100	2.37105
Sept15_2021	UA 3755-7	69.0941	0.619056	15.464	3.87154	0.195278	0.660729	2.12451	5.38682	2.45511	0.16635	100	5.89981
Sept15_2021	UA 3755-8	69.3773	0.382598	14.7832	4.46124	0.217476	0.263581	1.92847	5.3865	3.02123	0.230512	100	5.40979
Sept15_2021	UA 3755-11	69.502	0.644766	14.9556	3.53856	0.110042	0.507664	2.01419	4.71363	3.85563	0.203973	100	5.78912
Sept15_2021	UA 3755-18	69.5431	1.02601	14.217	3.98862	0.0561335	0.855364	2.55092	4.04451	3.65939	0.0760945	100	1.56322
Sept15_2021	UA 3755-2	70.4916	0.417177	14.9518	3.62861	0.139118	0.425832	1.47504	5.5248	2.80151	0.186612	100	6.58707
Sept15_2021	UA 3755-9	70.5362	0.474635	14.6624	4.02862	0.0766708	0.366025	2.17525	4.81627	2.70359	0.207013	100	4.46825
Sept15_2021	UA 3755-1	70.6252	0.501427	15.2014	3.3927	0.17608	0.377153	1.52084	5.31577	2.75531	0.173326	100	6.50739
Sept15_2021	UA 3755-5	74.1586	0.377112	13.4727	2.07716	0.0911122	0.19224	1.04766	4.02616	4.37006	0.241926	100	5.70531
Sept15_2021	UA 3755-6	74.1629	0.276876	13.5101	1.97579	0.053139	0.199115	1.03389	4.02841	4.55471	0.264921	100	6.11608
Sept15_2021	UA 3755-14	74.2153	0.295404	13.3843	2.18364	0.0762713	0.156643	0.996584	4.09151	4.41114	0.244415	100	3.74233
Sept15_2021	UA 3755-25	74.3234	0.265024	13.538	1.98074	0.0679666	0.217147	1.04014	4.10243	4.27517	0.245474	100	6.24957
Sept15_2021	UA 3755-3	74.3381	0.295276	13.3426	1.90032	0.0862035	0.242754	0.989117	4.07575	4.57058	0.20568	100	5.12447
Sept15_2021	UA 3755-15	74.3565	0.276274	13.5027	1.95281	0.0622768	0.174157	1.00314	4.08387	4.3787	0.27063	100	6.54631
Sept15_2021	UA 3755-21	74.5463	0.350928	13.5974	1.86709	0.0444478	0.425263	1.69168	3.73743	3.56331	0.227475	100	6.48365
Sept15_2021	UA 3755-16	75.4158	0.422033	12.7717	1.41882	0.0101511	0.154824	0.278679	3.16358	6.36437	0	100	4.39441
Sept15_2021	UA 3755-4	75.6295	0.283659	13.0577	1.77664	0.0481867	0.177789	1.08771	3.43101	4.35262	0.200253	100	5.01938
Sept15_2021	UA 3755-22	76.0979	0.151465	13.3956	1.41867	0.0530186	0.227559	1.31385	4.00422	3.12902	0.269459	100	5.83303
Sept15_2021	UA 3755-17	76.5056	0.232384	13.1049	1.47133	0.0685865	0.218608	1.3164	4.36487	2.56369	0.19844	100	6.96124
Sept15_2021	UA 3755-20	77.7682	0.086701	12.8675	0.53245	0.149706	0.0939712	0.526516	3.02374	4.91657	0.0446556	100	7.25246
Sept15_2021	UA 3755-10	77.7792	0.146	12.7833	1.29454	0.0946029	0.261787	1.48363	4.16219	1.89013	0.135059	100	6.07687
Sept15_2021	UA 3755-13	77.971	0.195392	12.7337	1.09406	0.0235584	0.169642	1.00923	4.36249	2.34103	0.128994	100	5.69389
Sept15_2021	UA 3755-24	78.0143	0.269518	12.5921	1.12022	0.0550415	0.194539	1.03767	4.21711	2.39954	0.129165	100	6.69945
Sept15_2021	UA 3755-19	78.2521	0.134065	12.4442	1.11779	0.053247	0.192292	1.06703	4.23747	2.37909	0.158354	100	6.15254	25
Sept15_2021	ID3506_002	74.3353	0.091304	13.2751	1.57862	0.090073	0.031662	0.767111	3.97209	5.10717	0.343394	99.5143	0.4857
Sept15_2021	ID3506_002	74.2615	0.046301	13.2508	1.64258	0.045734	0.034964	0.742798	4.16455	5.17811	0.350603	99.6388	0.3612
Sept15_2021	ID3506_002	74.0093	0.096896	13.2522	1.63661	0.037425	0.043477	0.766005	3.93014	5.10088	0.369237	99.1588	0.8412
Sept15_2021	ID3506_002	74.1062	0.039447	13.3862	1.69282	0.08316	0.026099	0.735206	4.01491	5.10194	0.329043	99.4407	0.5593
	Mean	74.1781	0.068487	13.2911	1.63766	0.064098	0.0340505	0.75278	4.02042	5.12202	0.348069	99.4381	0.56185	4
	StDev	0.14757	0.029795	0.0643876	0.0467392	0.0263739	0.00727151	0.0162148	0.102128	0.037491	0.0167168	0.20339	0.20339
Sept15_2021	Old Crow_002	77.4373	0.0829416	13.7234	1.7675	0.0568795	0.302135	1.51631	4.07143	0.803092	0.308573	100	4.82343
Sept15_2021	Old Crow_002	75.2495	0.302588	13.0732	1.64711	0.0653166	0.262283	1.50664	3.90212	3.78774	0.262835	100	4.42403
Sept15_2021	Old Crow_002	75.3986	0.259611	13.1012	1.75792	0.0610321	0.300015	1.49237	3.7709	3.63779	0.28491	100	4.52245
Sept15_2021	Old Crow_002	75.3914	0.320394	13.1294	1.63628	0.0512567	0.303834	1.45594	3.77104	3.71529	0.290773	100	2.51809
	Mean	75.8692	0.241383	13.2568	1.7022	0.0586213	0.292067	1.49282	3.87887	2.98598	0.286773	100	4.072	4
	StDev	1.04768	0.108666	0.311939	0.070118	0.00599752	0.019917	0.0264764	0.142484	1.45655	0.0188656	0	1.04978
Sept15_2021	UA 3755-44	67.9298	0.770277	15.2328	4.77214	0.193567	0.672502	2.47398	5.47006	2.33283	0.196372	100	4.11747		238.2 ka
Sept15_2021	UA 3755-47	69.6361	0.580414	15.2484	3.59165	0.187001	0.554138	1.91222	5.57235	2.56438	0.197941	100	7.22893
Sept15_2021	UA 3755-36	70.6264	0.456753	14.64	3.8999	0.0991924	0.404242	2.15354	4.75189	2.78862	0.231737	100	8.06147
Sept15_2021	UA 3755-35	70.7195	0.451462	14.9073	3.29579	0.127712	0.41739	1.42266	5.74075	2.76993	0.190493	100	4.69798
Sept15_2021	UA 3755-39	70.839	0.433856	14.2317	4.09644	0.102258	0.409875	2.20881	4.94283	2.56157	0.224304	100	4.20501
Sept15_2021	UA 3755-45	70.8673	0.456167	15.0713	3.39206	0.158841	0.371376	1.50833	5.49836	2.51065	0.213957	100	6.36183
Sept15_2021	UA 3755-28	71.0252	0.455759	14.1469	4.13948	0.0928104	0.394448	2.2369	4.73142	2.62383	0.197911	100	3.14664
Sept15_2021	UA 3755-50	72.6702	0.299139	14.4018	2.62571	0.0928924	0.14152	0.988523	5.18837	3.40022	0.247393	100	6.33461
Sept15_2021	UA 3755-42	72.801	0.412992	13.9009	3.51095	0.135676	0.3364	1.95333	4.96297	1.83906	0.189598	100	5.47942
Sept15_2021	UA 3755-27	73.8533	0.292749	13.1893	2.4197	0.0353082	0.159049	1.09504	3.77229	5.00709	0.227568	100	5.77817
Sept15_2021	UA 3755-31	74.0582	0.306695	13.5188	2.02452	0.07972	0.241396	1.09982	4.12101	4.38389	0.214346	100	6.05875
Sept15_2021	UA 3755-41	74.2252	0.283777	13.4399	2.01285	0.0927084	0.177022	0.999699	4.14196	4.43516	0.247614	100	6.09696
Sept15_2021	UA 3755-29	74.2769	0.278614	13.437	2.07951	0.0483851	0.192669	0.968302	4.13487	4.39935	0.238054	100	5.42126
Sept15_2021	UA 3755-38	74.5985	0.353232	13.3695	2.03407	0.0295851	0.212451	1.01157	4.05782	4.1439	0.244657	100	6.4226
Sept15_2021	UA 3755-33	74.6795	0.284293	13.162	1.92777	0.0781566	0.188773	1.01985	4.03289	4.43968	0.241586	100	5.94272
Sept15_2021	UA 3755-34	74.963	0.152375	13.6421	1.54837	0.0578315	0.0997443	0.962483	3.25989	5.26421	0.0645338	100	8.83686
Sept15_2021	UA 3755-49	75.0169	0.279271	13.1613	1.81778	0.0763609	0.19214	1.06404	3.82441	4.3706	0.254779	100	5.86415
Sept15_2021	UA 3755-37	75.0379	0.265352	14.3225	1.30431	0.0281203	0.378236	1.6213	4.04518	2.96806	0.0375596	100	6.30614
Sept15_2021	UA 3755-30	75.3125	0.227301	13.6833	1.3753	0.0748869	0.124564	0.475797	4.60807	4.06976	0.0625883	100	7.32294
Sept15_2021	UA 3755-40	76.812	0.0722714	13.3982	0.273391	0.0629618	0	0.659012	3.43535	5.26006	0.0346037	100	7.53598
Sept15_2021	UA 3755-46	76.9642	0.0156957	13.6492	0.576031	0.105567	0.111737	0.7678	3.75114	4.01508	0.0562783	100	8.28081
Sept15_2021	UA 3755-26	77.56	0.189655	12.3373	1.29816	0.0894042	0.186533	1.20098	3.82256	3.18998	0.162038	100	5.23264
Sept15_2021	UA 3755-43	77.9947	0.200982	12.5887	1.10459	0.0968391	0.161364	1.05646	4.25346	2.41776	0.161635	100	7.12537
Sept15_2021	UA 3755-48	78.0673	0.196458	12.5568	1.12527	0.0148511	0.156019	1.02835	4.37266	2.35663	0.162254	100	6.81478	24
Sept15_2021	UA 3745-5	62.4762	1.29766	16.4286	6.16913	0.163817	1.89202	4.58749	4.75809	2.10371	0.159313	100	3.33996		69.6 ka
Sept15_2021	UA 3745-4	62.8016	1.12637	16.2233	6.26532	0.18252	1.70317	4.36527	4.64189	2.6038	0.1121	100	2.75097
Sept15_2021	UA 3745-26	62.8291	1.27962	16.0856	6.39209	0.220828	1.75225	4.61858	4.70775	2.00879	0.13612	100	4.19419
Sept15_2021	UA 3745-41	64.8095	0.997051	15.3418	6.24143	0.168295	1.13742	3.52226	4.94496	2.74233	0.12267	100	3.59256
Sept15_2021	UA 3745-31	65.5745	0.895454	15.9485	4.90078	0.174148	1.30179	3.25586	4.90035	2.90197	0.189516	100	4.37385
Sept15_2021	UA 3745-38	65.8701	0.823787	16.0699	5.35576	0.188913	0.879759	3.07324	5.24422	2.37919	0.148768	100	4.02898
Sept15_2021	UA 3745-24	71.2789	0.584347	14.509	2.85203	0.00427023	0.551423	1.98068	4.58538	3.57353	0.103726	100	3.5181
Sept15_2021	UA 3745-37	72.5229	0.31766	14.0102	2.67604	0.0533746	0.223261	1.42339	4.77647	3.81555	0.234024	100	5.1872
Sept15_2021	UA 3745-15	72.5731	0.285567	14.002	2.5421	0.0952781	0.225677	1.48082	4.66234	3.93927	0.250367	100	7.3271
Sept15_2021	UA 3745-47	72.6596	0.29972	14.2485	2.57623	0.0697816	0.221425	1.36459	4.41387	3.96953	0.228229	100	5.61124
Sept15_2021	UA 3745-35	72.6954	0.270035	14.1404	2.51507	0.0719691	0.244266	1.40369	4.72767	3.74177	0.244909	100	6.83639
Sept15_2021	UA 3745-27	72.7026	0.283718	13.9622	2.48913	0.087725	0.206193	1.44729	4.70895	3.94765	0.212677	100	3.01282
Sept15_2021	UA 3745-7	72.8293	0.25773	14.082	2.55549	0.0297002	0.232914	1.37949	4.691	3.78246	0.206435	100	2.06799
Sept15_2021	UA 3745-33	72.9315	0.302238	14.0242	2.58027	0.0511957	0.194906	1.37597	4.59716	3.75903	0.237148	100	3.71269
Sept15_2021	UA 3745-8	72.9479	0.339186	14.0198	2.56838	0.0850379	0.225463	1.37003	4.36632	3.91814	0.2063	100	5.54564
Sept15_2021	UA 3745-30	72.9727	0.241601	13.9942	2.54791	0.0940905	0.215313	1.31184	4.4945	3.98979	0.178373	100	6.76422
Sept15_2021	UA 3745-13	73.021	0.259137	13.843	2.56031	0.039694	0.213881	1.33095	4.5769	3.97947	0.226897	100	2.57963
Sept15_2021	UA 3745-22	73.1336	0.259339	13.9216	2.4886	0.0730192	0.199628	1.32003	4.4545	3.99729	0.196764	100	5.8467
Sept15_2021	UA 3745-49	73.4601	0.369679	13.4614	2.29027	0.113328	0.309984	1.43467	4.51603	3.88782	0.202374	100	3.07463
Sept15_2021	UA 3745-3	74.0197	0.289829	13.8721	1.79232	0.0437532	0.276955	1.32291	4.42854	3.79153	0.209691	100	5.03085
Sept15_2021	UA 3745-46	74.0992	0.288273	13.7995	1.86896	0.032564	0.261093	1.34269	4.24054	3.88375	0.236899	100	7.19814
Sept15_2021	UA 3745-19	74.1156	0.27917	13.5505	1.96653	0.0768763	0.260919	1.38286	4.26454	3.9317	0.221249	100	6.79705
Sept15_2021	UA 3745-14	74.1464	0.36509	13.6966	1.8809	0.0590182	0.222246	1.35622	4.31019	3.80633	0.202619	100	3.98727
Sept15_2021	UA 3745-32	74.1594	0.312776	13.6913	1.97281	0.0160727	0.268056	1.34732	4.22388	3.84419	0.212161	100	6.15791
Sept15_2021	UA 3745-34	74.2131	0.287904	13.7261	1.84331	0.0737529	0.244355	1.32841	4.47221	3.62765	0.236662	100	3.3991
Sept15_2021	UA 3745-44	74.6858	0.310614	13.7007	1.6713	0.0361406	0.279571	1.43659	4.1861	3.61803	0.0969183	100	4.96844
Sept15_2021	UA 3745-50	74.7566	0.151211	13.9003	1.70783	0.0431399	0.256964	1.3306	4.11966	3.65903	0.0964347	100	7.55195
Sept15_2021	UA 3745-48	74.8179	0.252456	13.6717	1.64901	0.0592273	0.245463	1.3854	4.15601	3.68262	0.10368	100	7.17801
Sept15_2021	UA 3745-6	74.8333	0.215736	13.7565	1.61943	0.0974996	0.218852	1.44143	4.11977	3.61561	0.105708	100	6.11137
Sept15_2021	UA 3745-23	74.9252	0.327284	13.7176	1.90416	0.0619639	0.2836	1.53758	4.7284	2.40413	0.142119	100	6.72627
Sept15_2021	UA 3745-9	75.0832	0.261215	13.8362	1.70623	0.0589442	0.329734	1.34313	5.06197	2.17443	0.187255	100	5.88387
Sept15_2021	UA 3745-29	75.0865	0.206669	13.547	1.69885	0.036768	0.205776	1.38198	4.06433	3.7018	0.0909659	100	6.61441
Sept15_2021	UA 3745-1	75.1008	0.249464	13.5638	1.69048	0.0435372	0.196355	1.35186	4.14839	3.57729	0.100633	100	4.62184
Sept15_2021	UA 3745-39	75.1075	0.234954	13.4899	1.78197	0.0690456	0.224328	1.371	4.12373	3.51282	0.109495	100	6.58054
Sept15_2021	UA 3745-16	75.1714	0.297689	12.873	1.73012	0.053951	0.278843	1.44222	3.99655	3.90316	0.326801	100	5.29546
Sept15_2021	UA 3745-17	75.1883	0.258108	13.3645	1.64609	0.0429566	0.207258	1.41178	4.18954	3.59478	0.124865	100	3.60505
Sept15_2021	UA 3745-12	75.2806	0.212247	13.8192	1.67716	0.113958	0.260909	1.43554	5.02584	2.0451	0.16712	100	5.22378
Sept15_2021	UA 3745-28	75.2843	0.209935	13.4667	1.6403	0.0585419	0.223619	1.3045	4.15587	3.57214	0.108573	100	3.77154
Sept15_2021	UA 3745-2	75.3036	0.261144	13.5914	1.5111	0.0707732	0.19021	1.39293	3.97915	3.59406	0.136305	100	6.05479
Sept15_2021	UA 3745-36	75.375	0.325734	13.2378	1.77895	0.0531569	0.267569	1.46465	3.55174	3.78366	0.208945	100	7.21251
Sept15_2021	UA 3745-45	75.4123	0.227553	13.5721	1.69089	0.0524176	0.26363	1.32849	3.72625	3.62272	0.133938	100	8.23892
Sept15_2021	UA 3745-40	75.6401	0.289045	13.7898	1.57962	0.0711904	0.272705	1.33488	4.84555	2.06461	0.145233	100	7.3948
Sept15_2021	UA 3745-18	76.4308	0.123549	12.9161	1.23722	0.0732637	0.0869743	0.92263	3.93146	4.19422	0.108127	100	5.79515
Sept15_2021	UA 3745-11	76.4511	0.185406	13.3711	1.51545	0.0914963	0.304862	1.68108	4.33436	1.97466	0.116972	100	6.02568
Sept15_2021	UA 3745-21	76.4856	0.245633	13.5913	1.51654	0.0493386	0.280703	1.62259	4.21829	1.86877	0.156537	100	7.81257
Sept15_2021	UA 3745-43	76.5457	0.0995727	12.9593	1.31371	0.0777318	0.161722	1.04485	3.78332	3.93124	0.106978	100	8.06213
Sept15_2021	UA 3745-42	76.7348	0.182982	13.4734	1.50631	0.119749	0.240392	1.67638	3.99198	1.94675	0.164493	100	8.18284
Sept15_2021	UA 3745-10	77.4144	0.101809	13.0128	0.748438	0.0976775	0.178582	1.09108	3.7482	3.51116	0.123731	100	6.13494
Sept15_2021	UA 3745-25	77.4314	0.131061	12.938	0.86602	0.0587098	0.117525	1.14271	3.57555	3.59292	0.188683	100	8.50762
Sept15_2021	UA 3745-20	77.6229	0.0886161	12.9439	0.782367	0.0694809	0.0998676	0.941802	3.68874	3.67255	0.115857	100	6.6434	50
Sept15_2021	ID3506_003	73.262	0.091081	13.2042	1.56072	0.094858	0.044046	0.733442	4.04795	5.03537	0.342357	98.3388	1.6612
Sept15_2021	ID3506_003	73.2973	0.068966	13.0632	1.50302	0.070142	0.031565	0.751881	4.00885	5.03368	0.282206	98.0471	1.9529
Sept15_2021	ID3506_003	73.2758	0.057657	13.018	1.63239	0.081153	0.043541	0.736915	3.87734	4.98843	0.310902	97.952	2.048
Sept15_2021	ID3506_003	73.5397	0.062801	13.0179	1.55224	0.089442	0.047553	0.755927	4.00914	5.15127	0.327262	98.4793	1.5207
	Mean	73.3437	0.0701263	13.0758	1.56209	0.0838987	0.0416762	0.744541	3.98582	5.05219	0.315682	98.2043	1.7957	4
	StDev	0.131471	0.0147149	0.0882016	0.0533237	0.0107644	0.00697296	0.0110281	0.0746151	0.0695407	0.0257497	0.246362	0.246362
Sept15_2021	Old Crow_003	75.2451	0.332657	12.9846	1.72461	0.0623419	0.277427	1.50635	3.86122	3.79759	0.268716	100	5.03183
Sept15_2021	Old Crow_003	75.4177	0.298422	13.1438	1.71139	0.0700649	0.268919	1.47597	3.87585	3.52918	0.269646	100	5.57466
Sept15_2021	Old Crow_003	75.2767	0.32901	12.8472	1.75098	0.0593599	0.258646	1.50772	3.85784	3.90139	0.272589	100	4.70668
Sept15_2021	Old Crow_003	75.0298	0.352171	13.1537	1.77048	0.0817945	0.302539	1.45259	3.79585	3.85657	0.264169	100	5.48511
	Mean	75.2423	0.328065	13.0323	1.73937	0.0683903	0.276883	1.48566	3.84769	3.77118	0.26878	100	5.19957	4
	StDev	0.160337	0.0222245	0.145744	0.0264788	0.0100101	0.0187486	0.0264735	0.0354351	0.166839	0.00348918	0	0.405504
Sept15_2021	UA 3746-41	59.2332	1.38069	17.1461	7.58876	0.166477	2.22127	6.13528	4.73245	1.34414	0.0667675	100	4.14796
Sept15_2021	UA 3746-18	63.0564	1.25658	15.9246	6.01775	0.0699268	1.86857	4.8165	4.54149	2.39756	0.0654279	100	3.26455		93.8 ka
Sept15_2021	UA 3746-50	65.4715	0.87806	15.9476	4.943	0.19779	1.3444	3.36405	4.88867	2.80402	0.207714	100	3.27884
Sept15_2021	UA 3746-34	69.2241	0.807373	14.0266	4.60954	0.115652	0.599408	2.41356	4.17831	3.90809	0.151627	100	1.98188
Sept15_2021	UA 3746-16	70.6901	0.66698	14.6065	3.10964	0.0142786	0.623288	2.22565	4.41387	3.57317	0.0986283	100	2.92437
Sept15_2021	UA 3746-3	72.6473	0.301476	14.1825	2.59987	0.0511101	0.268045	1.37518	4.48702	3.91924	0.217276	100	5.48448
Sept15_2021	UA 3746-42	72.8102	0.288174	14.0266	2.55892	0.0537673	0.221917	1.39572	4.59932	3.87468	0.220448	100	4.66699
Sept15_2021	UA 3746-22	73.4413	0.434692	13.9419	2.31381	0.0732199	0.323044	1.39108	4.13328	3.79217	0.200807	100	3.33776
Sept15_2021	UA 3746-17	73.4603	0.450757	13.7883	2.22406	0.0399971	0.274088	1.4265	4.29244	3.88823	0.200535	100	6.31323
Sept15_2021	UA 3746-26	73.5471	0.405603	13.7267	2.20377	0.0673956	0.3317	1.43154	4.27018	3.82867	0.241931	100	5.26832
Sept15_2021	UA 3746-15	73.6792	0.388777	13.5443	2.25284	0.065278	0.317802	1.47684	4.19133	3.94959	0.173245	100	6.44471
Sept15_2021	UA 3746-19	73.6915	0.453319	13.6221	2.21027	0.0877489	0.282615	1.36531	4.22209	3.89005	0.226281	100	5.0848
Sept15_2021	UA 3746-7	73.708	0.457797	13.7089	2.25152	0.0248378	0.289499	1.43817	4.17003	3.79297	0.20438	100	5.12854
Sept15_2021	UA 3746-1	73.7273	0.349468	13.7873	2.13128	0.0793368	0.295152	1.45865	4.23128	3.80469	0.17494	100	6.02725
Sept15_2021	UA 3746-49	73.7457	0.394138	13.5997	2.17483	0.0851281	0.290658	1.37449	4.25287	3.91598	0.215005	100	5.7749
Sept15_2021	UA 3746-28	73.7989	0.401532	13.6345	2.2729	0.010203	0.276755	1.43924	4.34751	3.64791	0.220183	100	4.78286
Sept15_2021	UA 3746-37	73.8155	0.390779	13.4752	2.27601	0.00890168	0.283039	1.43113	4.29266	3.84736	0.231724	100	6.51207
Sept15_2021	UA 3746-45	73.8346	0.308871	13.9881	1.85064	0.0778194	0.271003	1.29188	4.19041	4.01085	0.227133	100	5.65466
Sept15_2021	UA 3746-33	73.8691	0.340355	13.9565	1.84342	0.0882645	0.269894	1.33433	4.36262	3.77712	0.204693	100	5.65178
Sept15_2021	UA 3746-6	73.8789	0.284504	13.7126	1.89455	0.053061	0.243046	1.35023	4.45305	3.93813	0.247854	100	6.01765
Sept15_2021	UA 3746-23	73.9042	0.327747	13.8126	1.90971	0.012995	0.258285	1.3369	4.36421	3.88614	0.241716	100	3.83259
Sept15_2021	UA 3746-20	73.9082	0.312682	13.9931	1.83113	0.0471396	0.262202	1.33096	4.21675	3.95354	0.186325	100	5.72055
Sept15_2021	UA 3746-4	73.9289	0.330033	13.6658	1.86886	0.0650251	0.237193	1.39729	4.37867	3.94785	0.233099	100	6.45157
Sept15_2021	UA 3746-9	73.9313	0.320906	14.2886	1.77407	0.0405714	0.250582	1.30206	4.15179	3.74429	0.252807	100	7.62452
Sept15_2021	UA 3746-32	74.0104	0.254171	13.7728	1.84342	0.0645891	0.277987	1.34834	4.39036	3.83333	0.264311	100	5.44231
Sept15_2021	UA 3746-48	74.0761	0.374073	13.5087	2.15226	0.088388	0.331738	1.47953	4.15714	3.70391	0.16548	100	6.08119
Sept15_2021	UA 3746-8	74.0811	0.244918	13.6598	1.89411	0.00442715	0.253958	1.34868	4.35281	3.98668	0.223994	100	5.96659
Sept15_2021	UA 3746-10	74.091	0.316298	13.8713	1.8358	0.0655563	0.24505	1.31631	4.3108	3.78983	0.204068	100	6.83576
Sept15_2021	UA 3746-40	74.1987	0.295202	13.6323	1.87511	0.008529	0.260907	1.31216	4.31201	3.94709	0.204088	100	2.41534
Sept15_2021	UA 3746-35	74.2243	0.369133	13.7619	1.79863	0	0.268325	1.25172	4.09466	4.05941	0.22212	100	7.96894
Sept15_2021	UA 3746-44	74.2528	0.352194	13.8342	1.90423	0.0241553	0.257854	1.33611	4.06391	3.79187	0.23589	100	8.20632
Sept15_2021	UA 3746-30	74.2826	0.448107	13.5669	2.08327	0.0243174	0.291322	1.3595	4.26913	3.54616	0.166123	100	2.95445
Sept15_2021	UA 3746-25	74.3138	0.265644	13.7595	1.838	0.0486859	0.25842	1.31549	4.17045	3.89385	0.175674	100	5.86599
Sept15_2021	UA 3746-27	74.4122	0.410781	13.4753	2.16477	0.0429225	0.266424	1.24136	3.83023	4.00607	0.19381	100	6.20529
Sept15_2021	UA 3746-43	74.4235	0.276037	13.4989	1.88431	0.0310835	0.279892	1.30799	4.19307	3.96362	0.182789	100	6.32968
Sept15_2021	UA 3746-5	74.4357	0.280537	13.9288	1.90157	0.0810869	0.220245	1.30611	3.70213	3.96318	0.233446	100	9.54645
Sept15_2021	UA 3746-38	74.538	0.464609	12.2859	3.03218	0.10927	0.131885	1.02437	3.59696	4.6724	0.186547	100	6.17213
Sept15_2021	UA 3746-12	74.607	0.334558	13.6587	1.96868	0.0534279	0.312235	1.68277	5.02621	2.22377	0.17134	100	3.84984
Sept15_2021	UA 3746-14	74.6191	0.222103	13.6241	1.83142	0	0.236385	1.24105	4.16424	3.89304	0.217673	100	6.89932
Sept15_2021	UA 3746-2	74.6407	0.317004	13.7906	1.92774	0.0513644	0.347313	1.54299	5.02866	2.21604	0.177492	100	5.85501
Sept15_2021	UA 3746-36	75.1087	0.361481	13.2294	1.74426	0.0559621	0.262015	1.46243	3.76669	3.81986	0.244342	100	5.74329
Sept15_2021	UA 3746-11	75.1709	0.43975	12.5579	2.22613	0.0638801	0.192056	0.913173	3.35988	4.98058	0.123671	100	6.59526
Sept15_2021	UA 3746-46	75.1868	0.364114	13.2075	1.62182	0.0696669	0.296077	1.47011	3.75586	3.80347	0.290005	100	6.52088
Sept15_2021	UA 3746-39	75.7956	0.310687	12.8035	1.82125	0.0647397	0.224258	1.20154	3.862	3.64667	0.348405	100	5.67454
Sept15_2021	UA 3746-31	75.8404	0.264472	13.7866	1.90351	0.0553312	0.280727	1.43515	2.21246	3.99813	0.28826	100	7.11575
Sept15_2021	UA 3746-29	76.1341	0.289316	14.0176	1.95448	0.0280361	0.295898	1.30106	2.04997	3.76254	0.215809	100	10.8148
Sept15_2021	UA 3746-13	76.364	0.299397	12.7771	0.75403	0.00146429	0.0252101	0.700639	2.60439	6.39305	0.104309	100	5.07365
Sept15_2021	UA 3746-47	76.968	0.00380007	12.7924	0.76839	0.00295858	0.000821234	0.387324	3.45231	5.59431	0.0384871	100	6.23869
Sept15_2021	UA 3746-24	77.8416	0.132008	12.6786	1.0351	0.0296786	0.144534	0.944243	4.08706	2.97754	0.167328	100	6.24894	49
Sept15_2021	UA 3747-22	69.3286	0.444937	14.6138	4.29852	0.0999683	0.366665	2.05207	4.20896	4.42358	0.210271	100	6.25729		115.0 ka
Sept15_2021	UA 3747-5	70.589	0.59763	14.9204	3.13958	0.0895296	0.646146	2.11564	4.72273	3.05578	0.159495	100	3.09467
Sept15_2021	UA 3747-12	70.8861	0.543593	14.7671	3.02741	0.126429	0.647014	2.35978	4.51032	3.00537	0.163859	100	6.35486
Sept15_2021	UA 3747-8	72.3671	0.252453	14.3128	2.57281	0.124114	0.221347	1.43068	4.54574	3.99828	0.225729	100	5.67015
Sept15_2021	UA 3747-7	72.4715	0.346603	14.2833	2.60562	0.0956798	0.218358	1.42249	4.51732	3.83833	0.259343	100	6.44735
Sept15_2021	UA 3747-25	72.4888	0.338138	14.0944	2.61364	0.0817595	0.253834	1.42321	4.55215	3.95917	0.251681	100	5.33945
Sept15_2021	UA 3747-20	72.6735	0.357785	14.042	2.64904	0.0770669	0.206072	1.35937	4.65957	3.80223	0.223874	100	3.2633
Sept15_2021	UA 3747-1	72.7551	0.221736	14.2582	2.47149	0.0571983	0.255211	1.35037	4.68414	3.77263	0.224723	100	5.80486
Sept15_2021	UA 3747-24	72.7559	0.254294	14.2685	2.56973	0.0452301	0.227754	1.42252	4.32895	3.93736	0.245082	100	5.27775
Sept15_2021	UA 3747-21	72.7816	0.291963	14.3329	2.52141	0.0441703	0.216483	1.39707	4.61413	3.63329	0.215726	100	6.15645
Sept15_2021	UA 3747-6	72.8874	0.300608	14.0854	2.55605	0.0711197	0.216305	1.27538	4.38158	4.07923	0.189904	100	5.11208
Sept15_2021	UA 3747-15	72.9134	0.32885	14.1421	2.41491	0.0692808	0.22184	1.43187	4.35678	3.96057	0.207073	100	6.48498
Sept15_2021	UA 3747-11	73.0874	0	18.7713	0.103385	0.0109707	0.584115	1.96869	1.92031	3.54388	0.0128311	100	11.7925
Sept15_2021	UA 3747-9	73.0952	0.299285	14.0954	2.24837	0.0444839	0.300796	1.27774	4.76011	3.6335	0.316587	100	7.0586
Sept15_2021	UA 3747-16	73.4847	0.398155	14.3555	2.0493	0.168387	0.388423	1.82651	5.36997	1.84506	0.147256	100	4.94844
Sept15_2021	UA 3747-23	74.6155	0.311996	13.2941	1.80533	0.0543534	0.202095	1.16303	3.86228	4.52654	0.212833	100	5.83477
Sept15_2021	UA 3747-13	74.9098	0.298685	13.3888	1.73295	0.0559315	0.271698	1.47935	3.74071	3.88215	0.309752	100	6.2746
Sept15_2021	UA 3747-19	75.3263	0.335773	12.9624	1.77684	0.11593	0.271233	1.46684	3.71587	3.7926	0.305092	100	7.00144
Sept15_2021	UA 3747-10	75.3339	0.359495	13.0288	1.71557	0.0345761	0.243693	1.49379	3.74428	3.82337	0.287343	100	8.22563
Sept15_2021	UA 3747-14	75.3824	0.319239	13.0475	1.79771	0.0422665	0.256605	1.45362	3.8182	3.70622	0.227727	100	5.31028
Sept15_2021	UA 3747-4	75.5017	0.289328	13.0515	1.75661	0.0888381	0.264386	1.47574	3.75353	3.6238	0.251249	100	6.65831
Sept15_2021	UA 3747-18	76.3513	0.0940271	13.2958	0.634395	0.0117015	0.0653104	0.891666	3.40865	5.20086	0.0597747	100	5.39645
Sept15_2021	UA 3747-3	77.2129	0.144566	12.9827	1.12774	0.0673378	0.216086	1.26607	3.67706	3.14914	0.201976	100	7.5037
Sept15_2021	UA 3747-17	77.4609	0.103189	12.8828	0.785879	0.0599763	0.10385	1.03327	3.4678	3.97258	0.167505	100	7.74517
Sept15_2021	UA 3747-2	78.0489	0.156833	12.5775	1.01942	0.0310474	0.153303	0.922097	4.05368	2.93215	0.135773	100	6.3272	25
Sept15_2021	ID3506_004	73.9401	0.031791	13.1059	1.60006	0.060914	0.040585	0.744263	4.21101	5.08353	0.30434	99.0539	0.9461
Sept15_2021	ID3506_004	73.9781	0.108113	13.2663	1.59439	0.060938	0.04553	0.736498	3.99412	5.11747	0.313673	99.1444	0.8556
Sept15_2021	ID3506_004	73.7864	0.073405	12.9048	1.60411	0.020786	0.042828	0.712473	4.15161	5.0434	0.344768	98.6067	1.3933
Sept15_2021	ID3506_004	74.3392	0.095165	13.0154	1.69059	0.081765	0.037118	0.745098	4.05321	5.24308	0.336423	99.5612	0.4388
	Mean	74.011	0.0771185	13.0731	1.62229	0.0561007	0.0415153	0.734583	4.10249	5.12187	0.324801	99.0915	0.90845	4
	StDev	0.234001	0.03344	0.152814	0.0457092	0.0255105	0.00356103	0.0152402	0.0972316	0.0862916	0.0189406	0.391519	0.391519
Sept15_2021	Old Crow_004	75.2912	0.338788	13.0321	1.8179	0.0658824	0.269908	1.43719	3.81274	3.74884	0.23957	100	5.26759
Sept15_2021	Old Crow_004	75.6288	0.307343	12.9555	1.68976	0.0455687	0.304349	1.49602	3.77559	3.58369	0.275602	100	5.59532
Sept15_2021	Old Crow_004	75.5046	0.292358	12.9034	1.72895	0.0657192	0.28157	1.45057	3.85099	3.7293	0.248769	100	4.95466
Sept15_2021	Old Crow_004	75.769	0.245109	12.9794	1.66041	0.0625513	0.292116	1.49937	3.66559	3.61115	0.278163	100	4.52793
	Mean	75.5484	0.2959	12.9676	1.72426	0.0599304	0.286986	1.47079	3.77623	3.66825	0.260526	100	5.08638	4
	StDev	0.202617	0.0389981	0.0534222	0.0684528	0.00969645	0.0147061	0.0315771	0.0799222	0.0829336	0.0192852	0	0.455
Sept15_2021	UA 3747-42	67.1282	0.775136	15.4186	5.07596	0.155133	0.874152	2.63289	5.07633	2.69838	0.213307	100	2.85977		115.0 ka
Sept15_2021	UA 3747-49	70.7246	0.565383	14.903	2.97915	0.113064	0.641292	2.28771	4.58174	3.05498	0.192365	100	3.09883
Sept15_2021	UA 3747-50	70.7634	0.357487	14.7802	3.20618	0.0700553	0.326526	1.64301	4.1519	4.46244	0.308334	100	6.9978
Sept15_2021	UA 3747-32	70.8211	0.399659	14.9973	3.26015	0.207831	0.384344	1.50936	5.48591	2.77216	0.209522	100	5.99719
Sept15_2021	UA 3747-38	71.1996	0.573511	14.6834	2.93875	0.102433	0.589226	2.22299	4.59783	2.98787	0.134817	100	5.21982
Sept15_2021	UA 3747-26	71.3935	0.554559	14.4163	2.87328	0.068329	0.558104	1.97237	4.35277	3.7264	0.109009	100	4.68622
Sept15_2021	UA 3747-45	72.1178	0.430127	14.4031	2.86807	0.104921	0.468395	1.85985	4.23342	3.41886	0.123268	100	1.67185
Sept15_2021	UA 3747-34	72.2702	0.462567	14.1651	3.03313	0.0380089	0.438907	1.79869	4.16857	3.55356	0.0920533	100	1.49402
Sept15_2021	UA 3747-28	72.2829	0.327125	14.3476	2.59527	0.0883145	0.22323	1.47001	4.55827	3.9482	0.205581	100	5.80713
Sept15_2021	UA 3747-48	72.376	0.25285	14.3023	2.578	0.102432	0.200219	1.49938	4.48002	4.04031	0.217499	100	3.82055
Sept15_2021	UA 3747-29	72.541	0.249386	14.2685	2.46158	0.0437198	0.207098	1.44439	4.53402	4.10023	0.193781	100	4.82112
Sept15_2021	UA 3747-33	72.605	0.240863	14.2642	2.47635	0.0638902	0.2103	1.35092	4.49631	4.10082	0.247029	100	4.44851
Sept15_2021	UA 3747-30	72.623	0.269387	14.1137	2.53647	0.0397362	0.242698	1.41644	4.59969	3.97255	0.240569	100	5.73582
Sept15_2021	UA 3747-37	72.7074	0.294697	14.2938	2.38754	0.0350471	0.228375	1.38939	4.57965	3.91618	0.217021	100	4.95364
Sept15_2021	UA 3747-35	72.7552	0.32378	14.3133	2.31297	0.0861462	0.286267	1.3836	4.70895	3.61083	0.282688	100	6.57042
Sept15_2021	UA 3747-41	72.8499	0.246978	14.0759	2.55975	0.0817355	0.237477	1.35877	4.56418	3.86122	0.212087	100	3.22443
Sept15_2021	UA 3747-31	74.7344	0.338325	13.3359	1.84991	0.0792366	0.272631	1.46975	3.82829	3.87111	0.284691	100	5.34044
Sept15_2021	UA 3747-39	75.0911	0.367543	13.1135	2.06593	0.0836196	0.35045	1.69831	4.30953	2.75167	0.217409	100	5.30805
Sept15_2021	UA 3747-27	75.1201	0.365798	13.1242	1.84029	0.00883423	0.27209	1.46746	3.86433	3.71224	0.290168	100	5.70764
Sept15_2021	UA 3747-40	77.3	0.258488	12.7572	1.17623	0.0209166	0.233238	1.26835	3.73959	3.08631	0.205989	100	6.87791
Sept15_2021	UA 3747-46	77.3764	0.130767	12.9123	1.07802	0.0924243	0.219125	1.31276	3.77183	2.95751	0.192258	100	6.62302
Sept15_2021	UA 3747-36	77.519	0.224326	12.892	1.14294	0.0135635	0.235757	1.29772	3.54233	2.97056	0.208995	100	7.68613
Sept15_2021	UA 3747-47	78.6148	0.195066	12.4386	1.12889	0.0617587	0.167225	0.987768	3.86157	2.44077	0.133875	100	7.5758
Sept15_2021	UA 3747-43	78.6504	0.110876	13.1499	0.836851	0.0653534	0.142833	0.964152	2.28975	3.62462	0.213409	100	10.5143
Sept15_2021	UA 3747-44	79.1767	0.610646	11.8497	2.33521	0.0570809	0.190648	0.665987	2.24449	2.74603	0.159568	100	5.01028	25
Sept15_2021	UA 3748-23	62.9708	1.22359	16.2524	7.33765	0.157055	1.54565	2.24157	4.13585	4.00933	0.16299	100	4.71132		119.2 ka
Sept15_2021	UA 3748-13	63.0252	1.00197	15.857	7.57421	0.275593	1.03878	3.85795	4.74613	2.50669	0.150276	100	3.11497
Sept15_2021	UA 3748-3	72.3495	0.340898	14.2448	2.55871	0.083259	0.206752	1.38169	4.67119	3.96741	0.252772	100	5.01324
Sept15_2021	UA 3748-10	72.3734	0.295712	14.2823	2.51723	0.07764	0.20688	1.41494	4.61542	4.03619	0.232789	100	5.30656
Sept15_2021	UA 3748-11	72.3746	0.307862	14.3114	2.51538	0.051099	0.221911	1.39539	4.73628	3.93824	0.190852	100	4.97663
Sept15_2021	UA 3748-5	72.4518	0.273153	14.2256	2.66685	0.0999399	0.232651	1.38425	4.43679	4.05159	0.22913	100	4.23544
Sept15_2021	UA 3748-2	72.4938	0.276894	14.3015	2.49753	0.0921547	0.2319	1.40598	4.39192	4.12873	0.231789	100	6.64715
Sept15_2021	UA 3748-9	72.5957	0.276491	14.2289	2.64724	0.0829663	0.21984	1.40645	4.54511	3.80219	0.251982	100	4.70104
Sept15_2021	UA 3748-8	72.7035	0.271969	13.9823	2.74383	0.0583471	0.199945	1.39252	4.48799	3.98093	0.230783	100	4.91555
Sept15_2021	UA 3748-1	72.8183	0.242274	14.1479	2.54145	0.0190876	0.210279	1.43739	4.51806	3.86941	0.253091	100	5.40472
Sept15_2021	UA 3748-24	72.9471	0.341943	14.2032	2.68056	0.0705275	0.237578	1.34846	4.1779	3.82363	0.218519	100	7.85865
Sept15_2021	UA 3748-25	75.4046	0.313848	13.1156	1.7138	0.0818429	0.273201	1.39743	3.69963	3.77321	0.293115	100	6.951
Sept15_2021	UA 3748-21	75.5094	0.342492	13.1988	1.68601	0.0558326	0.282676	1.4884	3.49948	3.72592	0.272574	100	8.1647
Sept15_2021	UA 3748-22	77.0785	0.211067	13.0066	1.13662	0.0278721	0.229499	1.25074	3.95549	2.93085	0.22301	100	5.46108
Sept15_2021	UA 3748-7	77.0818	0.198299	13.0496	1.03375	0.080932	0.22511	1.35618	3.80488	3.01732	0.196549	100	7.17768
Sept15_2021	UA 3748-12	77.2195	0.212986	12.8597	1.23365	0.093076	0.225544	1.25122	3.744	2.99661	0.21145	100	7.37888
Sept15_2021	UA 3748-15	77.2394	0.100194	12.8746	0.81044	0.106413	0.129212	0.954478	3.92078	3.72753	0.17692	100	4.65319
Sept15_2021	UA 3748-16	77.286	0.144113	12.8861	1.1264	0.0474643	0.241927	1.3062	3.79524	3.02968	0.176849	100	6.32536
Sept15_2021	UA 3748-17	77.3174	0.170035	12.7357	1.15314	0.0862212	0.211222	1.3182	4.01855	2.84282	0.189478	100	6.57401
Sept15_2021	UA 3748-20	77.34	0.194171	12.7209	1.1837	0.0839861	0.219878	1.32662	3.8639	2.89453	0.222416	100	7.47517
Sept15_2021	UA 3748-6	77.3929	0.113687	12.9583	0.703924	0.109742	0.0863716	0.816918	3.76774	3.90915	0.182459	100	7.43259
Sept15_2021	UA 3748-19	77.4213	0.102537	12.1724	1.33308	0.0660911	0.0241034	0.205104	4.21724	4.38611	0.0929516	100	5.51531
Sept15_2021	UA 3748-18	77.4619	0.155092	12.8604	1.43637	0.0901787	0.265815	1.74413	3.93653	1.94281	0.137967	100	7.62338
Sept15_2021	UA 3748-14	77.5086	0.171455	12.8485	1.1561	0.0267033	0.191986	1.29684	3.6915	2.91395	0.251008	100	6.31493
Sept15_2021	UA 3748-4	77.8846	0.119128	12.6308	1.07684	0.0634874	0.168316	1.00213	4.02254	2.94147	0.117271	100	7.93926	25
Sept15_2021	Old Crow_005	74.986	0.313321	13.2574	1.71394	0.0717362	0.298227	1.51784	3.78285	3.79014	0.346971	100	5.60279
Sept15_2021	Old Crow_005	75.2083	0.377523	13.0557	1.81911	0.0798493	0.269988	1.41294	3.75233	3.80201	0.286963	100	4.84079
Sept15_2021	Old Crow_005	75.6285	0.328597	12.8792	1.72326	0.0841151	0.236058	1.43089	3.75753	3.72596	0.265984	100	3.07685
Sept15_2021	Old Crow_005	76.2499	0.297758	13.181	1.74477	0.0633007	0.273739	1.51944	2.81854	3.63456	0.280221	100	6.08472
Sept15_2021	Old Crow_005	75.2651	0.363894	12.9378	1.88594	0.0434893	0.281034	1.49778	3.84663	3.6597	0.282266	100	4.67533
Sept15_2021	Old Crow_005	75.5501	0.233439	12.963	1.64322	0.0541022	0.305361	1.4665	3.79357	3.78962	0.25973	100	5.45491
	Mean	75.4813	0.319089	13.0457	1.75504	0.0660988	0.277401	1.47423	3.62524	3.73367	0.287022	100	4.9559	6
	StDev	0.44356	0.0516463	0.147943	0.0854984	0.015546	0.0245206	0.0451574	0.396636	0.0725844	0.0311455	0	1.05494
Sept15_2021	ID3506_005	73.9078	0.105129	13.1203	1.55133	0.038783	0.004367	0.722717	3.96302	5.09006	0.336114	98.7637	1.2363
Sept15_2021	ID3506_005	73.762	0.039853	13.2561	1.65852	0.080252	0.060767	0.704351	3.87315	5.20084	0.362396	98.9165	1.0835
Sept15_2021	ID3506_005	74.1476	0.048654	13.2198	1.67344	0.035973	0.037346	0.734949	3.99111	5.24967	0.319234	99.3857	0.6143
Sept15_2021	ID3506_005	73.3288	0.070298	13.1598	1.62154	0.044256	0.042121	0.691803	3.94105	5.05976	0.251482	98.1541	1.8459
Sept15_2021	ID3506_005	73.6224	0.106076	13.1996	1.58324	0.073263	0.035296	0.728722	4.02652	5.06818	0.300549	98.676	1.324
Sept15_2021	ID3506_005	73.7544	0.068702	13.1494	1.61268	0.088439	0.023874	0.719408	3.98623	5.2719	0.321862	98.9242	1.0758
	Mean	73.7538	0.0731187	13.1842	1.61679	0.060161	0.0339618	0.716992	3.96351	5.15673	0.315273	98.8034	1.19663	6
	StDev	0.274501	0.0277252	0.0501273	0.0456085	0.0231085	0.0188464	0.0160807	0.0527595	0.0954325	0.0374169	0.401461	0.401461
Sept16_2021	ID3506_001	73.91	0.07	13.13	1.55	0.09	0	0.75	4.11	5.32	0.29	99.16	0.84
Sept16_2021	ID3506_002	73.75	0.09	13.19	1.54	0.06	0.05	0.75	4.06	5.3	0.33	99.03	0.97
Sept16_2021	ID3506_003	73.44	0.06	13.17	1.53	0.07	0.04	0.75	4.02	5.29	0.3	98.59	1.41
Sept16_2021	ID3506_004	73.79	0.11	13.21	1.65	0.05	0.04	0.75	4.06	5.2	0.32	99.12	0.88
Sept16_2021	ID3506_005	73.43	0.07	13.21	1.48	0.04	0.04	0.75	4.2	5.31	0.36	98.81	1.19
Sept16_2021	ID3506_006	73.73	0.12	12.96	1.62	0.08	0.03	0.74	4.1	5.14	0.3	98.75	1.25
	Mean	73.675	0.0866667	13.145	1.56167	0.065	0.0333333	0.748333	4.09167	5.26	0.316667	98.91	1.09	6
	StDev	0.196138	0.0242212	0.0954463	0.0624233	0.0187083	0.0175119	0.00408248	0.0621021	0.0729383	0.0258199	0.227596	0.227596
Sept16_2021	OldCrow_001	75.0263	0.284332	13.3168	1.7554	0.0616979	0.287315	1.47907	3.76736	3.7998	0.286555	100	2.14251
Sept16_2021	OldCrow_002	75.2081	0.300658	13.0041	1.75278	0.0203716	0.291795	1.46856	3.82526	3.96061	0.21683	100	3.50787
Sept16_2021	OldCrow_003	75.6227	0.268033	13.0066	1.6385	0.0764227	0.290758	1.48567	3.53992	3.843	0.294879	100	6.27522
Sept16_2021	OldCrow_004	75.1403	0.357747	13.2596	1.73326	0.117882	0.292575	1.47165	3.64871	3.79412	0.237753	100	5.89448
Sept16_2021	OldCrow_005	75.1175	0.275534	12.9768	1.76406	0.0667963	0.284306	1.58036	3.76855	3.94936	0.279966	100	5.40791
Sept16_2021	OldCrow_006	75.5717	0.261002	13.1261	1.73849	0.0450385	0.296297	1.48801	3.60661	3.643	0.28894	100	6.44001
	Mean	75.2811	0.291217	13.115	1.73041	0.0647014	0.290507	1.49555	3.69273	3.83165	0.267487	100	4.94467	6
	StDev	0.252175	0.0353816	0.14486	0.0464281	0.0326517	0.00419901	0.0422369	0.110984	0.117157	0.0321873	0	1.73434
Sept16_2021	UA 3748-23	64.1336	0.981865	15.6396	6.76072	0.223323	1.03621	3.69168	4.98648	2.41175	0.173917	100	3.74705		119.2 ka
Sept16_2021	UA 3748-17	66.9388	0.758535	15.6078	4.7279	0.133078	0.90346	2.69283	5.03424	3.00416	0.257279	100	6.50187
Sept16_2021	UA 3748-8	67.7368	1.14031	14.3849	4.74467	0.0246263	0.992003	3.24124	4.23214	3.45098	0.0674897	100	9.17433
Sept16_2021	UA 3748-4	71.076	0.573729	14.5646	2.93652	0.0202611	0.562538	2.09937	4.40351	3.68043	0.107125	100	3.15907
Sept16_2021	UA 3748-14	72.4104	0.28431	14.1978	2.70375	0.0854196	0.22548	1.42219	4.44102	4.06194	0.216554	100	6.42902
Sept16_2021	UA 3748-19	72.6166	0.210385	14.0676	2.63508	0.0544434	0.234486	1.42451	4.66597	3.9138	0.228911	100	4.63305
Sept16_2021	UA 3748-18	72.6793	0.265767	13.9606	2.55013	0.0995244	0.212606	1.35392	4.70838	3.99593	0.224436	100	4.13912
Sept16_2021	UA 3748-10	72.6812	0.263099	14.3018	2.52477	0.0683791	0.192054	1.42407	4.45738	3.89633	0.246524	100	5.66858
Sept16_2021	UA 3748-11	72.7091	0.253683	14.1526	2.64721	0.0829713	0.211895	1.40135	4.56127	3.81447	0.213685	100	3.69324
Sept16_2021	UA 3748-12	72.7451	0.462137	14.7899	2.29907	0.118055	0.469191	2.12605	4.99561	1.87706	0.152024	100	4.42414
Sept16_2021	UA 3748-15	72.7902	0.226051	14.2596	2.56634	0.0579788	0.208429	1.39245	4.45402	3.85155	0.249874	100	5.64997
Sept16_2021	UA 3748-9	72.8972	0.308161	14.1785	2.5441	0.0339329	0.202281	1.36784	4.20858	4.0699	0.244616	100	4.95347
Sept16_2021	UA 3748-7	72.9361	0.303467	14.1528	2.48596	0.0421383	0.2403	1.31841	4.44153	3.91675	0.209864	100	6.81644
Sept16_2021	UA 3748-21	72.9798	0.263063	14.2288	2.53764	0.0471373	0.205842	1.35591	4.25092	3.94066	0.245509	100	7.65915
Sept16_2021	UA 3748-16	73.0299	0.300459	13.9256	2.57357	0.0883252	0.19222	1.28281	4.55706	3.87306	0.228567	100	6.29399
Sept16_2021	UA 3748-25	73.0415	0.300532	13.8458	2.6016	0.0391246	0.244569	1.41758	4.2223	4.08881	0.25609	100	6.61622
Sept16_2021	UA 3748-6	73.121	0.325153	14.1271	2.43432	0.058758	0.22743	1.49731	4.02546	4.02081	0.210144	100	4.52537
Sept16_2021	UA 3748-20	73.6623	0.274285	13.6018	2.47539	0.0925667	0.195144	1.3307	4.20446	3.90037	0.339714	100	7.49482
Sept16_2021	UA 3748-3	75.2665	0.333177	13.2405	1.72715	0.0593648	0.275354	1.41931	3.56645	3.90708	0.264859	100	7.74157
Sept16_2021	UA 3748-24	76.7306	0.0964901	13.7808	0.481061	0.125383	0.100536	0.743314	3.75919	4.14689	0.0460973	100	7.83408
Sept16_2021	UA 3748-2	77.2189	0.195604	12.7504	1.19641	0.116976	0.222774	1.32725	3.81034	3.00073	0.207541	100	6.26224
Sept16_2021	UA 3748-5	77.4609	0.252808	12.5616	1.17609	0.120788	0.242777	1.34657	3.82634	2.86675	0.187872	100	6.89609
Sept16_2021	UA 3748-1	77.7012	0.0627695	12.8981	0.765637	0.0600233	0.153798	1.09097	3.52713	3.60707	0.172121	100	8.60051
Sept16_2021	UA 3748-13	77.8307	0.145236	12.5223	1.00787	0.0462258	0.167911	0.921298	4.16735	3.05418	0.176856	100	5.6913
Sept16_2021	UA 3748-22	77.8311	0.203839	12.5059	1.05789	0.0848348	0.122584	0.944893	4.24825	2.89007	0.142882	100	7.06997	25
Sept16_2021	UA 3750-30	67.8183	0.56141	15.2222	4.67617	0.188083	0.662702	2.34703	6.1444	2.26932	0.142335	100	3.41374		141.6 ka
Sept16_2021	UA 3750-8	68.3789	0.598091	15.4513	4.44746	0.170438	0.638774	2.23251	5.59586	2.3715	0.148652	100	3.49509
Sept16_2021	UA 3750-37	68.5638	0.575282	15.4433	4.58693	0.167495	0.639531	2.2987	5.20296	2.42425	0.126138	100	2.39601
Sept16_2021	UA 3750-4	69.6411	0.59178	15.2573	3.90525	0.190493	0.506102	1.77419	5.11616	2.84213	0.226736	100	2.71992
Sept16_2021	UA 3750-15	69.7951	0.467197	15.2117	3.78349	0.197217	0.385965	1.68073	5.72052	2.60168	0.201988	100	5.54537
Sept16_2021	UA 3750-28	70.1548	0.544344	14.8415	4.00037	0.137827	0.408554	1.6226	5.19291	2.95139	0.188124	100	5.88914
Sept16_2021	UA 3750-1	71.0346	0.339376	14.6417	3.23875	0.113839	0.322621	1.53287	5.31456	3.26925	0.248574	100	5.02923
Sept16_2021	UA 3750-2	72.4652	0.489534	14.2334	2.92373	0.132582	0.381539	1.79681	4.60203	2.8706	0.135051	100	6.71814
Sept16_2021	UA 3750-26	72.5108	0.25871	14.9542	2.07738	0.0874323	0.569331	2.3563	4.12268	2.90793	0.200465	100	7.7846
Sept16_2021	UA 3750-34	72.6104	0.314048	14.4069	2.59606	0.107324	0.167106	1.01196	5.0072	3.56747	0.273198	100	6.53425
Sept16_2021	UA 3750-39	73.9533	0.327238	13.7337	2.74649	0.0840258	0.210719	1.39724	4.55336	2.83492	0.205301	100	5.76233
Sept16_2021	UA 3750-10	74.245	0.314226	13.4794	1.88882	0.0346709	0.20539	0.995909	4.33265	4.30427	0.257768	100	6.30178
Sept16_2021	UA 3750-6	74.4472	0.375729	13.3409	2.48996	0.0695192	0.208877	1.31272	4.69059	2.91552	0.192328	100	6.77112
Sept16_2021	UA 3750-29	74.6398	0.324854	13.3851	2.56067	0.0508237	0.217127	1.33934	4.55685	2.807	0.152901	100	5.43184
Sept16_2021	UA 3750-20	74.6993	0.337764	13.4448	1.82063	0.0211123	0.255729	1.49604	3.96035	3.731	0.301155	100	6.14491
Sept16_2021	UA 3750-27	74.7993	0.299133	13.3347	2.46	0.0930258	0.185986	1.27118	4.64564	2.80499	0.136937	100	5.76914
Sept16_2021	UA 3750-40	74.8329	0.301163	13.6579	1.79655	0.0378479	0.221855	1.42188	3.87109	3.65906	0.25798	100	6.51782
Sept16_2021	UA 3750-12	74.8453	0.305064	13.4231	1.83894	0.0485625	0.266686	1.48809	3.73489	3.84316	0.266276	100	6.80457
Sept16_2021	UA 3750-41	74.8855	0.340113	13.3927	1.74728	0.0761889	0.261997	1.5393	3.70694	3.82761	0.287307	100	5.26833
Sept16_2021	UA 3750-25	74.9108	0.297532	13.2459	1.83599	0.0523319	0.243137	1.50359	4.01768	3.65243	0.310733	100	5.34455
Sept16_2021	UA 3750-47	74.9373	0.231279	13.3208	1.76392	0.0526622	0.283323	1.52904	3.89472	3.7749	0.273981	100	5.97242
Sept16_2021	UA 3750-14	74.9495	0.299625	13.2914	1.64654	0.0813827	0.297286	1.47765	3.782	3.93117	0.31415	100	6.05008
Sept16_2021	UA 3750-42	74.9625	0.339461	13.4251	1.79297	0.0467338	0.280447	1.50461	3.57904	3.87218	0.254537	100	6.12788
Sept16_2021	UA 3750-48	75.0149	0.361402	13.2079	1.81325	0.0543522	0.274089	1.59766	3.80953	3.66862	0.256069	100	6.30731
Sept16_2021	UA 3750-43	75.0203	0.409684	13.2823	1.73296	0.0450015	0.269381	1.57156	3.68514	3.76121	0.287397	100	5.661
Sept16_2021	UA 3750-24	75.0205	0.240219	13.2971	1.73199	0.0573244	0.285483	1.4897	3.82015	3.82332	0.302368	100	6.19006
Sept16_2021	UA 3750-22	75.0288	0.279765	13.4161	1.71548	0.0786788	0.271316	1.49297	3.72007	3.77837	0.282192	100	6.47296
Sept16_2021	UA 3750-23	75.0349	0.243736	13.3537	1.83076	0.0926428	0.244782	1.50524	3.76649	3.73831	0.244705	100	5.30616
Sept16_2021	UA 3750-46	75.0688	0.357496	13.3938	1.73292	0.0411696	0.276845	1.47372	3.57808	3.85738	0.283887	100	3.78589
Sept16_2021	UA 3750-33	75.0734	0.306756	13.1652	1.76073	0.0710253	0.277077	1.55177	3.75605	3.81467	0.288431	100	6.36441
Sept16_2021	UA 3750-17	75.0773	0.342572	13.1811	1.79965	0.0286416	0.286486	1.57536	3.80731	3.70963	0.24793	100	6.05962
Sept16_2021	UA 3750-21	75.104	0.303609	13.1751	1.78978	0.0482281	0.267056	1.51712	3.66488	3.89293	0.306441	100	6.11083
Sept16_2021	UA 3750-50	75.118	0.303013	13.2862	1.68171	0.0655418	0.265373	1.51007	3.89477	3.67594	0.257456	100	7.17828
Sept16_2021	UA 3750-38	75.163	0.311879	13.1731	1.82864	0.0700968	0.249196	1.50364	3.80915	3.69114	0.258484	100	5.10832
Sept16_2021	UA 3750-19	75.1674	0.297379	13.2837	1.88792	0.0604413	0.25495	1.43346	3.71213	3.69275	0.270803	100	6.27112
Sept16_2021	UA 3750-9	75.2003	0.299596	13.195	1.79425	0.0649187	0.257976	1.51201	3.72522	3.7294	0.286023	100	6.44609
Sept16_2021	UA 3750-32	75.2297	0.304449	13.2441	1.72502	0.0739079	0.246117	1.45635	3.8036	3.69202	0.290234	100	6.19405
Sept16_2021	UA 3750-35	75.2604	0.253581	13.2551	1.78917	0.0782836	0.237144	1.46661	3.62202	3.85451	0.236567	100	6.00198
Sept16_2021	UA 3750-11	75.3073	0.358518	13.093	1.79763	0.0648935	0.278085	1.44474	3.75584	3.69489	0.264897	100	6.33111
Sept16_2021	UA 3750-31	75.385	0.334296	13.1242	1.69671	0.0588289	0.301136	1.54292	3.59957	3.74721	0.271362	100	6.20083
Sept16_2021	UA 3750-36	75.523	0.305926	13.0362	1.83347	0.0580983	0.285495	1.46392	3.53617	3.74459	0.275102	100	7.42931
Sept16_2021	UA 3750-13	76.5387	0.117488	13.4046	1.08026	0.0843302	0.240117	1.3337	3.82489	3.21437	0.208706	100	7.58823
Sept16_2021	UA 3750-7	76.8715	0.132197	13.3186	1.05393	0.0423692	0.255252	1.52388	3.8917	2.76824	0.183829	100	6.62075
Sept16_2021	UA 3750-45	77.0037	0.210291	13.2367	0.970319	0.093533	0.211192	1.34843	3.59612	3.18382	0.188417	100	7.60484
Sept16_2021	UA 3750-3	77.402	0.156089	12.5452	1.27956	0.0587891	0.167204	1.31365	3.67202	3.30173	0.134212	100	6.45715
Sept16_2021	UA 3750-5	77.7626	0.198043	12.4229	1.25334	0.0242639	0.170776	1.22541	3.77178	3.05769	0.146274	100	6.9358
Sept16_2021	UA 3750-18	77.9098	0.168827	12.6659	1.06678	0.0841253	0.152427	1.04712	4.26134	2.48226	0.208641	100	7.2966
Sept16_2021	UA 3750-44	78.199	0.182083	12.5492	1.12317	0.0379202	0.18184	1.08881	4.08047	2.43366	0.159958	100	6.56684
Sept16_2021	UA 3750-16	78.2762	0.18671	12.529	1.03874	0.0582429	0.177825	1.06063	4.07068	2.48107	0.155976	100	7.45822
Sept16_2021	UA 3750-49	99.2375	0	0.00453729	0.0824151	0.0295419	0	0	0.496443	0.142838	0.00856903	100	13.164	50
Sept16_2021	ID3506_007	73.95	0.03	13.12	1.59	0.07	0.04	0.75	3.83	5.19	0.33	98.82	1.18
Sept16_2021	ID3506_008	74.11	0.05	13.24	1.53	0.06	0.05	0.76	4.15	5.14	0.34	99.36	0.64
Sept16_2021	ID3506_009	73.98	0.06	13.21	1.69	0.05	0.05	0.76	3.97	5.24	0.31	99.24	0.76
Sept16_2021	ID3506_010	74.36	0.08	13.25	1.58	0.07	0.04	0.76	4.01	5.06	0.28	99.42	0.58
Sept16_2021	ID3506_011	74.12	0.08	13.2	1.53	0.03	0.03	0.74	3.73	5.16	0.34	98.89	1.11
	Mean	74.104	0.06	13.204	1.584	0.056	0.042	0.754	3.938	5.158	0.32	99.146	0.854	5
	StDev	0.161957	0.0212132	0.0512835	0.0654217	0.0167332	0.0083666	0.00894427	0.16285	0.0664831	0.0254951	0.274554	0.274554
Sept16_2021	OldCrow_007	75.1398	0.298742	13.2476	1.67085	0.031244	0.32109	1.53224	3.71775	3.82072	0.283993	100	4.92574
Sept16_2021	OldCrow_008	75.5665	0.293437	12.966	1.72252	0.0526747	0.246768	1.51363	3.7098	3.7096	0.282949	100	5.99846
Sept16_2021	OldCrow_009	75.396	0.326763	13.045	1.67824	0.0612702	0.275533	1.49597	3.64964	3.84732	0.289642	100	5.35359
Sept16_2021	OldCrow_010	75.4288	0.260418	12.9814	1.69299	0.0904522	0.321895	1.53057	3.6795	3.81773	0.253482	100	6.18577
Sept16_2021	OldCrow_011	75.2781	0.344961	13.1338	1.73286	0.0456473	0.25903	1.52501	3.81506	3.66626	0.257367	100	3.94605
	Mean	75.3618	0.304864	13.0747	1.69949	0.0562576	0.284863	1.51948	3.71435	3.77233	0.273486	100	5.28192	5
	StDev	0.161133	0.0325225	0.11706	0.0271947	0.0220539	0.0349618	0.0150283	0.0624065	0.0793892	0.0167403	0	0.900962
Sept16_2021	UA 3753-14	64.1559	0.980387	15.0169	7.01312	0.239763	1.31855	4.17344	4.79562	2.19101	0.148876	100	2.75599		210.0 ka
Sept16_2021	UA 3753-40	66.7264	1.1508	15.3203	4.65422	0.0546404	1.23807	3.31341	4.21456	3.26983	0.0746127	100	1.99923
Sept16_2021	UA 3753-50	67.9879	0.598092	15.4505	4.64134	0.163728	0.637626	2.19084	5.80321	2.40637	0.155594	100	3.58753
Sept16_2021	UA 3753-3	68.2005	0.566233	15.555	4.63526	0.186117	0.543182	2.14856	5.63978	2.40095	0.160696	100	5.47296
Sept16_2021	UA 3753-26	68.2672	0.686419	15.3338	4.61192	0.188597	0.610141	2.3279	5.59122	2.27472	0.139524	100	4.37765
Sept16_2021	UA 3753-17	68.3899	0.60021	15.1252	4.68803	0.171691	0.542153	2.16737	5.66515	2.5207	0.167311	100	2.32965
Sept16_2021	UA 3753-36	68.4706	0.615832	15.2461	4.48787	0.200509	0.622004	2.15775	5.70053	2.39508	0.133928	100	6.56832
Sept16_2021	UA 3753-4	68.4884	0.61799	15.3506	4.49034	0.183725	0.566179	2.10896	5.63855	2.44415	0.143588	100	4.98386
Sept16_2021	UA 3753-23	68.4918	0.68792	15.2748	4.47826	0.197173	0.551397	2.26713	5.61537	2.31755	0.153257	100	2.78148
Sept16_2021	UA 3753-20	68.596	0.713765	15.2536	4.34942	0.174794	0.59823	2.08647	5.45943	2.65722	0.143616	100	5.62623
Sept16_2021	UA 3753-10	68.6533	0.672213	15.2572	4.32829	0.177146	0.541258	2.11352	5.70625	2.42585	0.161478	100	4.56804
Sept16_2021	UA 3753-43	68.6923	0.60592	15.3676	4.47029	0.150252	0.623085	2.12094	5.35286	2.49769	0.153763	100	7.11942
Sept16_2021	UA 3753-9	68.8128	0.617526	15.0127	4.35786	0.179679	0.510533	2.05459	6.00996	2.31709	0.164141	100	3.58036
Sept16_2021	UA 3753-6	68.9995	1.03442	14.6149	4.30881	0.034642	0.969907	2.71387	3.84392	3.44729	0.042255	100	2.39017
Sept16_2021	UA 3753-33	69.9148	0.584177	14.625	3.60605	0.0780709	0.442858	1.94327	4.60977	4.03258	0.211079	100	6.0687
Sept16_2021	UA 3753-12	70.2908	0.916515	14.2051	3.77075	0.0620917	0.686343	2.55592	3.43681	4.02824	0.0612647	100	2.29612
Sept16_2021	UA 3753-48	70.9622	0.550679	14.4296	2.98466	0.106608	0.348654	1.52516	4.40505	4.47803	0.270471	100	5.91896
Sept16_2021	UA 3753-46	71.1698	0.457303	14.9936	2.8161	0.153287	0.631991	2.49797	5.10027	2.02515	0.199543	100	3.17539
Sept16_2021	UA 3753-41	72.1792	0.477783	14.7714	2.83186	0.118017	0.480966	2.26471	4.72115	2.00247	0.196941	100	6.58765
Sept16_2021	UA 3753-13	72.3658	0.26862	13.7619	3.64229	0.134391	0.105584	1.46948	4.86071	3.19022	0.259605	100	6.53982
Sept16_2021	UA 3753-30	74.4017	0.308613	13.4189	2.00454	0.0622528	0.159259	1.03848	4.13849	4.2857	0.235133	100	6.87487
Sept16_2021	UA 3753-29	74.4091	0.30765	13.2469	1.99588	0.0271752	0.185107	0.993551	4.29722	4.36064	0.228236	100	6.32986
Sept16_2021	UA 3753-22	74.5121	0.269657	13.2528	1.96349	0.00904593	0.179515	1.00553	4.25615	4.36581	0.240111	100	6.14568
Sept16_2021	UA 3753-49	74.7382	0.306319	13.1502	1.77269	0.00751496	0.205364	1.20737	3.85309	4.56803	0.246903	100	5.81458
Sept16_2021	UA 3753-37	76.1238	0.201762	13.6666	0.952251	0.127849	0.100514	1.17328	4.08358	3.42574	0.186945	100	6.92466
Sept16_2021	UA 3753-27	76.7953	0.00818546	12.8541	1.13476	0.0427141	0.0185595	0.514537	3.01831	5.45933	0.199206	100	7.15247
Sept16_2021	UA 3753-25	76.8063	0.0545573	13.3162	0.701476	0.192631	0.0653607	0.853032	3.36895	4.55595	0.110301	100	6.55701
Sept16_2021	UA 3753-5	76.8584	0.072838	13.5402	0.814603	0.118935	0.0886964	0.849039	3.88066	3.68108	0.123421	100	7.12809
Sept16_2021	UA 3753-32	76.8974	0.141965	13.4207	0.716759	0.185464	0.106385	0.880239	3.97375	3.59243	0.109628	100	6.80098
Sept16_2021	UA 3753-15	76.9554	0.0926969	13.185	0.860468	0.133877	0.0987497	0.897936	3.93187	3.75141	0.11975	100	6.83719
Sept16_2021	UA 3753-44	76.9935	0.0948669	13.385	0.871144	0.179064	0.0909039	1.07958	3.96342	3.22731	0.148725	100	7.36706
Sept16_2021	UA 3753-34	76.9979	0.0658738	13.2929	0.816147	0.136425	0.0863716	0.854704	3.82698	3.83357	0.115016	100	7.59001
Sept16_2021	UA 3753-21	77.0245	0.0467774	13.25	0.739625	0.163198	0.0787139	0.863269	3.96191	3.78438	0.11333	100	7.04059
Sept16_2021	UA 3753-31	77.0401	0.0372079	13.157	0.840725	0.13816	0.0816441	0.889525	3.74945	3.98316	0.107248	100	7.72388
Sept16_2021	UA 3753-47	77.0728	0.0622752	13.3182	0.801702	0.140743	0.0723798	0.886434	3.80706	3.75484	0.108002	100	6.30949
Sept16_2021	UA 3753-38	77.1191	0.054342	13.1651	0.784029	0.179188	0.0595682	0.904096	3.9884	3.65356	0.11956	100	6.68173
Sept16_2021	UA 3753-1	77.153	0	13.3108	0.751428	0.130746	0.102565	0.863767	3.77815	3.80966	0.129012	100	7.92901
Sept16_2021	UA 3753-11	77.1984	0.0439948	13.1548	0.820257	0.152262	0.0933826	0.897496	3.71738	3.82921	0.119928	100	7.88005
Sept16_2021	UA 3753-8	77.204	0.0559201	13.2577	0.727727	0.124669	0.0593612	0.892384	3.94516	3.63773	0.123068	100	6.83309
Sept16_2021	UA 3753-16	77.2646	0.279942	13.1498	1.677	0.0768552	0.251511	1.40797	3.84198	1.93975	0.142865	100	7.83833
Sept16_2021	UA 3753-28	78.0182	0.172407	12.5287	1.06512	0.0486827	0.173379	1.07099	4.29542	2.48553	0.182839	100	6.84575
Sept16_2021	UA 3753-24	78.0991	0.113122	12.4365	0.804014	0.226167	0.0415169	0.659262	3.27086	4.16762	0.234876	100	7.24492
Sept16_2021	UA 3753-7	78.144	0.17385	12.7104	1.10455	0.0827545	0.211655	1.10136	4.02256	2.34219	0.137906	100	7.57237
Sept16_2021	UA 3753-19	78.2036	0.162025	12.4494	1.06167	0.0745892	0.157749	1.08438	4.231	2.42684	0.191954	100	6.85651
Sept16_2021	UA 3753-45	78.219	0.10196	12.4656	1.0906	0.0645156	0.173053	1.11385	4.11478	2.53743	0.154035	100	7.69051
Sept16_2021	UA 3753-2	78.2378	0.154411	12.6411	1.09451	0.0439289	0.192034	1.03937	4.057	2.4188	0.156419	100	6.51492
Sept16_2021	UA 3753-39	78.3052	0.200255	12.4087	1.13239	0.0677807	0.180992	1.07781	4.08059	2.41792	0.165865	100	7.996
Sept16_2021	UA 3753-35	78.4608	0.195306	12.2579	1.07614	0.0363768	0.164111	1.06445	4.20443	2.4176	0.158733	100	6.5091
Sept16_2021	UA 3753-42	78.5871	0.214706	12.2215	1.16143	0.0735084	0.167865	1.09678	3.90426	2.4521	0.155852	100	7.42287
Sept16_2021	UA 3753-18	78.6636	0.151475	12.4776	1.13888	0.0276504	0.12822	0.999793	3.95467	2.34138	0.150747	100	7.69021	50
Sept16_2021	UA 3756-4	67.5965	0.549028	15.6846	4.81025	0.178311	0.595623	2.5827	5.20743	2.65894	0.176446	100	2.81284		256.6 ka
Sept16_2021	UA 3756-23	68.698	0.796859	15.2363	4.21358	0.158919	0.881415	2.76212	4.74087	2.41428	0.126083	100	2.39895
Sept16_2021	UA 3756-12	70.1359	0.388744	14.9141	4.4816	0.198229	0.322463	2.01359	4.41662	2.95973	0.218271	100	7.52335
Sept16_2021	UA 3756-13	71.3284	0.435821	14.6258	3.27964	0.153596	0.282701	1.4527	4.9589	3.28277	0.25795	100	7.14736
Sept16_2021	UA 3756-19	71.3671	0.572314	14.8071	2.73431	0.173722	0.593343	2.23668	4.65344	2.75654	0.136326	100	5.64372
Sept16_2021	UA 3756-6	72.3674	0.14099	16.0184	2.21389	0.0815058	0.363349	1.59753	4.2341	2.87503	0.139109	100	8.00527
Sept16_2021	UA 3756-11	72.7458	0.353283	14.0644	2.65905	0.0848133	0.232221	1.02251	3.87216	4.7715	0.250884	100	6.67026
Sept16_2021	UA 3756-14	73.023	0.328273	13.6497	2.69339	0.0468647	0.25006	1.37401	3.68004	4.76257	0.248091	100	6.49456
Sept16_2021	UA 3756-20	74.3647	0.281969	13.6882	1.93616	0.0725123	0.216255	1.06581	3.78595	4.41763	0.220597	100	6.33307
Sept16_2021	UA 3756-16	74.4071	0.228835	13.2311	1.91194	0	0.214376	1.03941	4.29388	4.48649	0.241209	100	5.74682
Sept16_2021	UA 3756-18	74.7794	0.31993	13.2687	1.71262	0.0568639	0.203171	1.12502	3.73019	4.61035	0.250227	100	5.40749
Sept16_2021	UA 3756-21	74.927	0.305784	13.2321	1.74669	0.0398946	0.221232	1.26808	3.68066	4.41575	0.210287	100	4.20005
Sept16_2021	UA 3756-1	75.0407	0.319742	13.143	1.70721	0.00749908	0.143898	1.11288	3.83772	4.51355	0.224473	100	5.61506
Sept16_2021	UA 3756-5	75.1383	0.0737071	13.9402	1.62277	0.193862	0.286675	1.49311	3.87733	3.26639	0.139114	100	9.43203
Sept16_2021	UA 3756-22	75.2919	0.126872	14.4414	0.948776	0.149278	0.155205	1.43177	3.87341	3.38146	0.258148	100	16.4718
Sept16_2021	UA 3756-7	77.5692	0.18751	12.5202	1.25666	0.0288589	0.161081	1.31548	3.70701	3.1493	0.135276	100	6.67
Sept16_2021	UA 3756-8	77.7833	0.192258	12.5305	1.23255	0.022892	0.171576	1.28631	3.47155	3.22114	0.113456	100	7.10281
Sept16_2021	UA 3756-9	78.0118	0.230414	12.1201	1.21107	0.056168	0.178931	1.25897	3.31044	3.47818	0.185934	100	9.12089
Sept16_2021	UA 3756-10	78.1871	0.110007	12.3281	1.03738	0.0528117	0.150096	1.14822	3.52763	3.34514	0.146617	100	6.0056
Sept16_2021	UA 3756-2	78.221	0.249825	12.3743	1.13129	0.0944947	0.204274	1.08397	4.11545	2.41485	0.142738	100	6.98946
Sept16_2021	UA 3756-15	78.4247	0.194437	12.6192	1.05235	0.0524476	0.157789	1.10775	3.87718	2.38459	0.167247	100	8.01097
Sept16_2021	UA 3756-24	78.5246	0.2099	12.4045	1.09633	0.0639656	0.207102	1.07347	3.90275	2.38947	0.16513	100	6.93428
Sept16_2021	UA 3756-25	78.5811	0.237262	12.3128	1.07519	0.039373	0.143443	1.09172	4.06756	2.34091	0.142978	100	6.40292
Sept16_2021	UA 3756-3	78.585	0.15905	12.3061	1.07864	0.0365531	0.156356	1.06372	4.11814	2.36686	0.167399	100	6.90243
Sept16_2021	UA 3756-17	78.6397	0.225697	12.2085	1.10877	0.107883	0.182271	1.09028	3.80832	2.48965	0.179272	100	6.67758	25
Sept16_2021	ID 3506_012	74.43	0.06	13	1.57	0.06	0.02	0.76	3.92	5.23	0.29	99.26	0.74
Sept16_2021	ID 3506_013	74.45	0.06	13.29	1.6	0.08	0.07	0.73	4.06	5.12	0.35	99.74	0.26
Sept16_2021	ID 3506_014	74.22	0.11	13.23	1.57	0.05	0.02	0.71	4.06	5.17	0.3	99.37	0.63
Sept16_2021	ID 3506_015	74.25	0.06	13.22	1.61	0.06	0.05	0.78	4.18	5.21	0.36	99.68	0.32
Sept16_2021	ID 3506_016	74.64	0.06	13.16	1.65	0.02	0.05	0.76	4.02	5.41	0.33	100.02	-0.02
	Mean	74.398	0.07	13.18	1.6	0.054	0.042	0.748	4.048	5.228	0.326	99.614	0.386	5
	StDev	0.170206	0.0223607	0.11068	0.0331662	0.0219089	0.0216795	0.0277489	0.0933809	0.110091	0.0304959	0.304105	0.304105
Sept16_2021	OldCrow_012	75.2609	0.322495	13.0872	1.81204	0.0609941	0.285005	1.5219	3.79875	3.64773	0.262218	100	4.87117
Sept16_2021	OldCrow_013	75.8393	0.305177	13.1167	1.70953	0.057354	0.283778	1.53758	3.2806	3.63572	0.302473	100	3.73288
Sept16_2021	OldCrow_014	75.4404	0.385095	12.8532	1.66539	0.0831792	0.286237	1.50537	3.76417	3.79319	0.288974	100	4.71053
Sept16_2021	OldCrow_015	75.3441	0.31364	13.1153	1.72581	0.0730848	0.250529	1.51471	3.64401	3.81609	0.261731	100	5.11704
Sept16_2021	OldCrow_016	75.5595	0.308309	13.1988	1.6533	0.0831823	0.238518	1.43202	3.73527	3.59104	0.258393	100	3.01179
	Mean	75.4888	0.326943	13.0742	1.71322	0.0715589	0.268813	1.50232	3.64456	3.69675	0.274758	100	4.28868	5
	StDev	0.225313	0.033164	0.130442	0.0628783	0.0121022	0.0225935	0.0410228	0.21141	0.101052	0.0197799	0	0.886398
Sept16_2021	UA 3756-26	61.2722	1.38323	15.8055	7.5803	0.195355	1.93452	4.83093	4.74774	2.11959	0.168705	100	2.32666		256.6 ka
Sept16_2021	UA 3756-27	64.2235	1.08299	15.3889	6.83718	0.134733	1.65617	4.6372	4.41832	1.50949	0.144119	100	2.99871
Sept16_2021	UA 3756-47	64.4026	0.892425	15.71	6.10887	0.158526	1.44151	4.26905	4.62878	2.25078	0.177532	100	3.54908
Sept16_2021	UA 3756-37	68.3132	0.638441	15.4379	4.58827	0.168508	0.699641	2.48502	4.75179	2.76461	0.197051	100	2.9965
Sept16_2021	UA 3756-46	68.9725	0.512962	15.036	4.22428	0.20039	0.509807	2.07362	5.46468	2.85046	0.200692	100	3.8671
Sept16_2021	UA 3756-39	69.0796	0.587838	15.3028	4.23457	0.1734	0.525973	2.05752	5.01488	2.88004	0.185264	100	7.33038
Sept16_2021	UA 3756-32	69.7189	0.566803	15.2087	4.16186	0.150523	0.47373	1.92273	4.82173	2.81175	0.21086	100	8.19649
Sept16_2021	UA 3756-33	69.8773	0.517331	15.0869	4.09231	0.223909	0.399258	1.85053	4.86494	2.90017	0.242059	100	8.05584
Sept16_2021	UA 3756-40	70.1649	0.435283	15.4975	2.66029	0.116353	0.270253	1.37736	6.22966	3.0768	0.221447	100	13.839
Sept16_2021	UA 3756-29	70.1971	0.462871	15.1888	3.77983	0.0753529	0.394145	1.25017	5.20135	3.21426	0.304914	100	4.52921
Sept16_2021	UA 3756-52	70.8396	0.404443	15.0394	3.20177	0.206047	0.336342	1.52041	5.1418	3.13328	0.228636	100	6.99027
Sept16_2021	UA 3756-49	73.5551	0.292252	13.264	2.64477	0.0510614	0.228546	1.29765	3.8586	4.60158	0.266408	100	6.13257
Sept16_2021	UA 3756-35	73.662	0.339588	14.3174	2.04012	0.107804	0.455676	2.00152	4.32047	2.58084	0.225491	100	6.82987
Sept16_2021	UA 3756-28	74.2748	0.283781	13.3892	1.99699	0.0673376	0.126259	0.982592	4.1942	4.48428	0.259099	100	5.48069
Sept16_2021	UA 3756-50	74.4481	0.298665	13.2721	2.00096	0.0641281	0.204163	0.935191	4.14629	4.43792	0.248429	100	5.4049
Sept16_2021	UA 3756-38	74.6088	0.326716	13.692	1.73252	0.0349233	0.263529	1.3172	4.25789	3.62217	0.18629	100	6.80156
Sept16_2021	UA 3756-34	74.7785	0.327497	13.3102	1.6127	0.0309732	0.183694	1.12983	3.88527	4.54782	0.249902	100	4.03314
Sept16_2021	UA 3756-45	75.1356	0.256554	13.2351	1.76829	0.00452133	0.231192	1.12012	3.7348	4.33645	0.228999	100	6.28871
Sept16_2021	UA 3756-44	76.2323	0.149032	13.6424	1.21406	0.0954464	0.330469	1.89442	3.66272	2.6669	0.144938	100	6.62713
Sept16_2021	UA 3756-41	76.7231	0.0540338	13.6228	0.723037	0.146246	0.110667	1.16108	3.64121	3.72683	0.117738	100	7.96878
Sept16_2021	UA 3756-43	78.0533	0.219067	12.5793	1.11725	0.0287373	0.211473	1.10756	4.17232	2.40122	0.14165	100	6.38989
Sept16_2021	UA 3756-51	78.1453	0.229214	12.4775	1.11423	0.0316273	0.187054	1.10317	3.93936	2.60456	0.216804	100	11.1748
Sept16_2021	UA 3756-31	78.2681	0.21597	12.3157	1.09874	0.0556433	0.198283	1.06832	4.18639	2.46409	0.166338	100	5.75506
Sept16_2021	UA 3756-30	78.336	0.170668	12.35	1.04507	0.0756028	0.183212	1.08355	4.14741	2.44188	0.215194	100	6.23761
Sept16_2021	UA 3756-42	78.3606	0.134573	12.4625	1.09795	0.0978592	0.197134	1.03845	3.97197	2.51663	0.157869	100	7.37301
Sept16_2021	UA 3756-36	78.4314	0.144334	12.8196	0.858947	0.147178	0.244931	1.14406	3.47759	2.63656	0.123201	100	7.49626
Sept16_2021	UA 3756-48	78.7685	0.184564	12.2647	1.09258	0.0708775	0.164799	1.08977	3.73217	2.50279	0.167036	100	8.22903	27
Sept16_2021	UA 3757-14	61.3525	1.38368	15.6953	7.24822	0.14431	1.94105	4.92838	5.0465	2.13202	0.165387	100	4.79227		260.2 ka
Sept16_2021	UA 3757-44	61.9339	1.31609	16.0833	6.2144	0.0904645	2.24818	5.23117	4.13521	2.70031	0.0606666	100	3.43614
Sept16_2021	UA 3757-39	62.3905	1.10318	16.1177	6.72165	0.160574	1.67817	4.69368	4.93823	2.07774	0.153156	100	4.04035
Sept16_2021	UA 3757-45	64.2847	1.10568	14.6811	6.88204	0.154023	1.9324	5.08423	4.33077	1.34816	0.254236	100	16.3431
Sept16_2021	UA 3757-34	64.6801	0.978332	14.6737	6.64328	0.172173	1.25651	3.8533	4.24236	3.36667	0.172497	100	4.43085
Sept16_2021	UA 3757-1	65.041	0.797302	15.3748	5.53826	0.0874708	1.59002	5.18762	4.25681	2.01399	0.145578	100	2.68637
Sept16_2021	UA 3757-25	66.3699	0.818898	15.6345	4.84885	0.150879	1.1572	3.43908	4.72414	2.59007	0.34424	100	14.0164
Sept16_2021	UA 3757-6	66.5714	0.96394	15.8118	4.37391	0.0666066	1.25184	3.73493	4.95996	2.10343	0.209437	100	7.27201
Sept16_2021	UA 3757-4	68.6034	0.959331	14.7924	4.00904	0.0913892	0.993308	2.68845	4.04019	3.76239	0.0776176	100	4.9133
Sept16_2021	UA 3757-9	68.6244	0.523216	15.3745	4.24853	0.155162	0.532139	2.0622	5.24733	2.97212	0.336388	100	17.4919
Sept16_2021	UA 3757-40	68.8265	0.56262	15.2299	4.28834	0.162688	0.535587	2.07539	5.51169	2.61638	0.246557	100	7.5722
Sept16_2021	UA 3757-2	68.9059	0.529231	15.3287	4.06549	0.143844	0.429484	1.91391	5.69675	2.81138	0.226537	100	6.66962
Sept16_2021	UA 3757-50	69.0684	0.483043	15.2381	3.96277	0.135113	0.470769	2.15995	5.33813	2.9783	0.213619	100	7.28346
Sept16_2021	UA 3757-31	69.2553	0.530524	15.2499	3.98123	0.216081	0.427779	1.66472	5.66708	2.83827	0.218426	100	5.99017
Sept16_2021	UA 3757-16	69.6377	0.537069	15.0037	4.10037	0.178336	0.483398	1.96286	4.7352	3.20081	0.207301	100	6.8887
Sept16_2021	UA 3757-29	69.9408	0.44372	14.8883	3.81093	0.180886	0.380657	1.89258	5.50569	2.79158	0.212939	100	6.84502
Sept16_2021	UA 3757-33	70.454	0.352725	15.6028	2.6188	0.121556	0.350849	1.74222	4.81923	3.71958	0.28186	100	8.16714
Sept16_2021	UA 3757-23	70.4849	0.283351	15.4751	2.68225	0.122802	0.326027	1.81644	4.70531	3.88167	0.28669	100	7.54889
Sept16_2021	UA 3757-3	70.4937	0.37791	15.5193	2.64353	0.117259	0.274357	1.68045	4.74693	3.93744	0.269961	100	6.73382
Sept16_2021	UA 3757-8	71.4016	0.281353	14.5076	3.16312	0.0627241	0.204114	1.43145	5.20299	3.57883	0.214857	100	5.69814
Sept16_2021	UA 3757-20	71.6593	0.374385	14.6031	3.34346	0.0871318	0.350136	1.96752	5.19903	2.2609	0.200081	100	8.0738
Sept16_2021	UA 3757-30	73.7792	0.38946	13.4765	2.2253	0.0480164	0.259745	1.09239	4.16208	4.37273	0.251101	100	9.89749
Sept16_2021	UA 3757-11	73.93	0.344752	13.6663	1.94053	0.0765226	0.180687	1.0841	4.25018	4.31043	0.279616	100	5.83692
Sept16_2021	UA 3757-21	73.9605	0.274402	13.6052	1.93594	0.0738079	0.214557	1.0729	4.28537	4.39263	0.238707	100	6.62376
Sept16_2021	UA 3757-38	74.0452	0.314144	13.4819	1.99438	0.0349594	0.181684	0.976012	4.16118	4.62854	0.235225	100	8.02751
Sept16_2021	UA 3757-35	74.0504	0.287681	13.4129	2.07212	0.0512096	0.200476	1.01143	4.22548	4.48215	0.266287	100	7.18545
Sept16_2021	UA 3757-51	74.1241	0.285558	13.439	2.21899	0.0526767	0.166564	1.0261	4.11783	4.37425	0.251804	100	7.15067
Sept16_2021	UA 3757-49	74.1374	0.290238	13.3712	2.152	0.0749401	0.200874	1.06208	4.1806	4.34845	0.235356	100	6.93362
Sept16_2021	UA 3757-5	74.1583	0.312353	13.5646	1.8673	0.0651987	0.182216	1.04028	4.40171	4.24903	0.205547	100	5.00424
Sept16_2021	UA 3757-10	74.1749	0.314167	13.454	2.01867	0.0497836	0.168746	1.04563	4.19464	4.38063	0.256795	100	6.37285
Sept16_2021	UA 3757-12	74.1871	0.193743	13.9029	0.928094	0.0344226	0.134145	0.69499	3.52841	6.36913	0.0350341	100	5.47493
Sept16_2021	UA 3757-17	74.193	0.328925	13.2961	2.0009	0.0537231	0.160201	1.01162	4.35361	4.41712	0.238684	100	5.47092
Sept16_2021	UA 3757-15	74.2062	0.288127	13.5219	1.94291	0.0194625	0.207663	1.05344	4.08356	4.51943	0.203181	100	5.64403
Sept16_2021	UA 3757-27	74.242	0.261529	13.4411	1.99869	0.047861	0.19856	1.0451	4.13415	4.46118	0.219472	100	6.46657
Sept16_2021	UA 3757-32	74.2651	0.24938	13.5108	1.99371	0.0530724	0.173779	1.00895	4.09877	4.49309	0.198043	100	7.88999
Sept16_2021	UA 3757-28	74.2748	0.262698	13.4218	1.99983	0.0286062	0.167434	1.00419	4.21587	4.44261	0.23531	100	7.15995
Sept16_2021	UA 3757-42	74.3031	0.320756	13.2874	2.12383	0.0581973	0.199225	0.999952	4.11496	4.41706	0.226654	100	6.42869
Sept16_2021	UA 3757-46	74.3178	0.137739	15.2797	1.02968	0.0925272	0.288532	1.51478	4.17658	2.98668	0.227283	100	20.0192
Sept16_2021	UA 3757-47	74.3536	0.25505	13.3699	2.00821	0.0602723	0.215595	1.03316	4.20523	4.32	0.23113	100	7.45658
Sept16_2021	UA 3757-36	75.1398	0.328444	13.464	1.99831	0.0989799	0.383397	2.14797	4.07032	2.25251	0.150144	100	8.12685
Sept16_2021	UA 3757-13	75.3415	0.0969364	13.5081	1.47355	0.0506329	0.0198632	0.765995	3.86748	4.83534	0.052467	100	5.02024
Sept16_2021	UA 3757-7	75.6053	0.217649	12.9526	1.844	0.043772	0.177463	1.1764	4.14899	3.613	0.285115	100	6.52478
Sept16_2021	UA 3757-18	75.8181	0.199329	12.9685	1.28725	0.072266	0.213737	1.14105	3.53864	4.47809	0.365662	100	6.2588
Sept16_2021	UA 3757-48	75.8375	0.192407	13.3902	1.48308	0.0548468	0.315473	1.68278	4.03702	2.83234	0.22529	100	8.35204
Sept16_2021	UA 3757-24	76.0728	0.357134	12.8335	1.70632	0.0679367	0.361072	1.80149	3.48263	3.19426	0.158673	100	7.00903
Sept16_2021	UA 3757-37	76.1797	0.240867	12.5066	1.39481	0.0765427	0.172383	1.17289	3.24383	4.68772	0.419369	100	6.75006
Sept16_2021	UA 3757-43	76.2886	0.0978606	13.6056	0.804783	0.167198	0.096314	1.16325	3.49501	4.18092	0.129646	100	9.6756
Sept16_2021	UA 3757-19	76.7232	0.137024	13.2348	0.983893	0.102632	0.203595	1.64503	3.4689	3.40772	0.120291	100	5.10643
Sept16_2021	UA 3757-41	76.8746	0.212287	12.4683	1.5381	0	0.111361	0.850566	3.9883	3.85642	0.129259	100	6.09925
Sept16_2021	UA 3757-22	77.2972	0.0396329	13.0036	0.850034	0.029685	0.0783183	0.845149	3.70987	4.0824	0.0827208	100	9.87034
Sept16_2021	UA 3757-26	77.7396	0.177275	12.4589	1.21668	0.0227473	0.219093	1.32065	4.17377	2.51562	0.201152	100	7.50544	51
Sept16_2021	ID3506_018	73.6176	0.090263	12.874	1.62459	0.082651	0.039942	0.713856	4.08464	5.26461	0.289579	98.6164	1.3836
Sept16_2021	ID3506_019	73.55	0.08	12.99	1.63	0.06	0.04	0.75	4.17	5.28	0.3	98.79	1.21
Sept16_2021	ID3506_020	73.44	0.13	12.93	1.66	0.1	0.02	0.72	4.34	5.27	0.3	98.84	1.16
Sept16_2021	ID3506_021	74.23	0.08	12.98	1.58	0.08	0.04	0.76	4.18	5.1	0.31	99.26	0.74
Sept16_2021	ID3506_022	73.75	0.1	13.17	1.51	0.1	0.04	0.75	4.14	5.18	0.35	99.01	0.99
Sept16_2021	ID3506_022	73.63	0.05	13.12	1.69	0.08	0.04	0.75	3.85	5.25	0.33	98.72	1.28
	Mean	73.7029	0.0883772	13.0107	1.61576	0.0837752	0.036657	0.740643	4.12744	5.2241	0.313263	98.8727	1.12727	6
	StDev	0.277539	0.026398	0.113043	0.0635822	0.0149768	0.00816026	0.0188734	0.160448	0.0705537	0.022597	0.230551	0.230551
Sept16_2021	OldCrow_017	75.3722	0.375662	12.8939	1.77839	0.0512522	0.28223	1.46062	3.90047	3.65708	0.294666	100	3.88504
Sept16_2021	OldCrow_018	75.3305	0.344712	12.8379	1.67476	0.0639343	0.283731	1.55473	3.83272	3.86058	0.279436	100	3.06292
Sept16_2021	OldCrow_019	75.272	0.301245	13.0503	1.78827	0.0253691	0.258779	1.48992	3.7955	3.81248	0.266258	100	5.57808
Sept16_2021	OldCrow_020	75.2875	0.279919	13.1641	1.69146	0.0374446	0.256099	1.49383	3.84498	3.72742	0.280478	100	5.84214
Sept16_2021	OldCrow_021	75.3845	0.289971	13.1586	1.69324	0.0602608	0.291174	1.48193	3.74453	3.69445	0.260024	100	6.3322
Sept16_2021	OldCrow_022	75.3823	0.270162	12.9387	1.74222	0.0841237	0.252298	1.48153	3.75821	3.87352	0.280134	100	6.00509
	Mean	75.3382	0.310278	13.0072	1.72806	0.0537308	0.270718	1.49376	3.81274	3.77092	0.276833	100	5.11758	6
	StDev	0.0494998	0.0411962	0.138256	0.0484823	0.0207184	0.0168278	0.0320009	0.0584105	0.0905458	0.0121929	0	1.32218
All analyses on this day were focussed on Old Crow like morphologies.
Sept 17 2021	ID3506_001	75.496	0.093299	13.2176	1.5757	0.084599	0.049428	0.755046	4.16738	5.41142	0.331759	101.107	-1.107
Sept 17 2021	ID3506_002	75.0205	0.126971	13.3211	1.5662	0.087392	0.044969	0.743846	4.04801	4.97541	0.305394	100.171	-0.171
Sept 17 2021	ID3506_003	75.0202	0.098494	13.1641	1.55369	0.05271	0.06422	0.758972	3.95877	5.09665	0.370055	100.054	-0.054
Sept 17 2021	ID3506_004	75.1696	0.104409	13.3042	1.54016	0.040229	0.023439	0.79689	4.11029	4.99362	0.355754	100.358	-0.358
Sept 17 2021	ID3506_005	75.5433	0.157615	13.3346	1.51419	0.081851	0.036443	0.71255	4.0336	5.04908	0.2859	100.685	-0.685
Sept 17 2021	ID3506_006	75.4885	0.068218	13.3574	1.57906	0.070761	0.044067	0.799755	4.07889	5.10195	0.303375	100.824	-0.824
	Mean	75.2897	0.108168	13.2832	1.55483	0.0695903	0.043761	0.761177	4.06616	5.10469	0.325373	100.533	-0.533167	6
	StDev	0.247353	0.0307355	0.0755158	0.0245766	0.019188	0.0135556	0.0330789	0.0711016	0.158933	0.0328678	0.407031	0.407031
Sept 17 2021	OldCrow_001	75.405	0.284732	12.8999	1.74038	0.0439112	0.23298	1.52391	3.79657	3.86342	0.270128	100	2.0273
Sept 17 2021	OldCrow_002	75.4773	0.289565	13.0342	1.6579	0.0587275	0.252366	1.48108	3.87352	3.68572	0.244984	100	0.7348
Sept 17 2021	OldCrow_003	75.4127	0.346595	13.0578	1.62241	0.0574709	0.270711	1.49702	3.77187	3.74049	0.287926	100	3.3859
Sept 17 2021	OldCrow_004	75.6102	0.256137	12.9507	1.68971	0.0405143	0.247815	1.52385	3.68482	3.80087	0.2524	100	4.0562
Sept 17 2021	OldCrow_005	75.4079	0.318725	13.0751	1.697	0.0679347	0.275342	1.48067	3.63061	3.85055	0.253177	100	3.9401
Sept 17 2021	OldCrow_006	75.3445	0.358255	13.2657	1.62025	0.0595349	0.261069	1.50977	3.64157	3.75653	0.236052	100	4.3822
Sept 17 2021	OldCrow_007	75.18	0.335221	13.191	1.73752	0.0451528	0.248116	1.48337	3.69809	3.86144	0.28429	100	4.6947
Sept 17 2021	OldCrow_008	75.2204	0.316187	13.2065	1.71262	0.0750161	0.248502	1.44032	3.8146	3.74869	0.28056	100	1.9211
	Mean	75.3823	0.313177	13.0851	1.68473	0.0560328	0.254613	1.4925	3.73896	3.78846	0.26369	100	3.14279	8
	StDev	0.137138	0.0344233	0.127822	0.0472046	0.0121288	0.0137804	0.027684	0.0878764	0.0659138	0.0196014	0	1.41467
Sept 17 2021	UA 3749-29	66.8535	1.17453	14.9142	4.77197	0.039281	1.28185	3.37347	4.25069	3.25138	0.115129	100	2.8844		134.2 ka
Sept 17 2021	UA 3749-25	67.5651	0.674449	15.6126	4.82846	0.133169	0.786778	2.78251	5.07867	2.4049	0.172337	100	3.8142
Sept 17 2021	UA 3749-22	67.7984	0.681849	15.0861	4.44167	0.169157	0.681296	2.51961	5.57474	2.8652	0.234952	100	3.9433
Sept 17 2021	UA 3749-32	67.893	0.940664	15.3077	4.65728	0.203965	0.88533	2.71853	5.05528	2.2406	0.1263	100	3.1331
Sept 17 2021	UA 3749-40	68.4724	0.603901	15.4246	4.49449	0.154527	0.656695	2.29592	5.41865	2.3616	0.15133	100	2.9676
Sept 17 2021	UA 3749-14	68.55	0.647457	15.2156	4.28372	0.17461	0.535569	2.07371	5.96822	2.42731	0.159957	100	1.8954
Sept 17 2021	UA 3749-30	68.5628	0.654746	15.2257	4.44341	0.1804	0.616449	2.24006	5.59972	2.3552	0.156838	100	2.5551
Sept 17 2021	UA 3749-8	68.6928	0.768372	15.4893	3.76516	0.079502	0.871369	2.95334	4.82513	2.42999	0.161513	100	6.0087
Sept 17 2021	UA 3749-41	68.8554	0.552213	15.2848	4.33971	0.163033	0.49261	1.94392	5.79844	2.4366	0.172212	100	4.684
Sept 17 2021	UA 3749-46	69.189	0.551585	15.2203	4.13307	0.210698	0.53749	1.9801	5.50413	2.53632	0.177356	100	2.2314
Sept 17 2021	UA 3749-16	69.2785	0.529394	15.4294	3.35369	0.0638977	0.689425	2.37927	4.7888	3.29517	0.248604	100	4.7603
Sept 17 2021	UA 3749-23	69.778	0.654245	14.7446	4.7003	0.19764	0.597024	2.28901	4.63903	2.29488	0.136039	100	5.8127
Sept 17 2021	UA 3749-48	69.7883	0.607656	14.9475	4.17199	0.102263	0.706349	2.85124	4.70551	2.0087	0.142634	100	2.5619
Sept 17 2021	UA 3749-34	70.0613	0.690878	15.6697	4.65712	0.204925	0.681399	2.27937	3.27753	2.36642	0.14386	100	4.1804
Sept 17 2021	UA 3749-19	70.085	0.592162	14.6445	3.42168	0.075781	0.478705	2.01152	4.5643	3.97088	0.200777	100	5.4591
Sept 17 2021	UA 3749-38	70.5222	0.625428	14.7588	3.42169	0.113217	0.479318	1.94416	4.1211	3.84432	0.219131	100	7.1552
Sept 17 2021	UA 3749-31	70.6443	0.487016	14.6999	3.86353	0.116622	0.340903	1.6482	5.57074	2.49595	0.171335	100	5.2588
Sept 17 2021	UA 3749-11	70.8435	0.343188	14.8825	3.75051	0.143645	0.382825	1.70481	4.99003	2.81221	0.189502	100	5.6371
Sept 17 2021	UA 3749-37	70.8848	0.366947	14.6906	3.55202	0.161292	0.317786	1.59546	4.96417	3.24174	0.290855	100	6.9248
Sept 17 2021	UA 3749-9	71.1796	0.455082	14.9026	3.53668	0.130614	0.39689	1.51584	5.00714	2.76907	0.137444	100	5.6733
Sept 17 2021	UA 3749-12	71.1851	0.320619	15.0436	2.74564	0.114078	0.345588	1.50014	5.19586	3.37199	0.229117	100	5.3144
Sept 17 2021	UA 3749-27	71.6927	0.466387	14.7064	3.23367	0.114962	0.297571	1.37981	4.68388	3.24872	0.227093	100	6.183
Sept 17 2021	UA 3749-7	71.9023	0.409996	14.4603	3.46996	0.0894669	0.395991	2.01271	4.9457	2.17915	0.173409	100	5.536
Sept 17 2021	UA 3749-39	72.2276	0.437052	14.2586	3.37424	0.0864958	0.346664	2.00145	4.89969	2.2541	0.147292	100	6.8221
Sept 17 2021	UA 3749-50	72.2848	0.404877	14.3975	3.48795	0.100965	0.35656	1.88096	4.62011	2.33632	0.167781	100	6.6221
Sept 17 2021	UA 3749-44	72.6764	0.262499	14.3166	2.81943	0.119546	0.183321	1.00683	4.81907	3.57721	0.282986	100	6.2421
Sept 17 2021	UA 3749-49	72.8492	0.269552	14.3209	2.57987	0.100679	0.140419	1.03359	4.86488	3.59718	0.314705	100	6.2791
Sept 17 2021	UA 3749-10	73.4506	0.187484	14.0484	2.47421	0.0993472	0.140019	0.915635	4.84001	3.56683	0.358334	100	5.1619
Sept 17 2021	UA 3749-43	74.0711	0.364003	13.5216	2.10389	0.0303516	0.189371	0.995719	4.15344	4.39595	0.225417	100	5.3296
Sept 17 2021	UA 3749-1	74.2774	0.39261	14.0864	1.77302	0.0686093	0.307317	1.72019	4.47875	2.78145	0.147581	100	4.8861
Sept 17 2021	UA 3749-21	74.4085	0.279848	13.6383	2.00739	0.0569228	0.16013	1.00594	3.8835	4.37906	0.232968	100	5.876
Sept 17 2021	UA 3749-36	74.4995	0.266044	13.4551	1.9259	0.0738136	0.186861	1.02679	3.90762	4.49027	0.21717	100	1.7444
Sept 17 2021	UA 3749-13	74.8008	0.36093	13.8993	1.82033	0.0742811	0.317752	1.69172	4.1676	2.72139	0.188517	100	4.7403
Sept 17 2021	UA 3749-26	74.9273	0.292033	13.7797	1.6535	0.0263202	0.321553	1.58218	4.55187	2.72897	0.17631	100	6.3495
Sept 17 2021	UA 3749-35	74.9637	0.29575	13.0555	1.92002	0.0393783	0.185233	1.01635	3.94152	4.40058	0.235049	100	6.1665
Sept 17 2021	UA 3749-18	74.9814	0.288439	13.1134	1.79511	0.100118	0.181692	1.15828	3.67483	4.46591	0.311152	100	4.5939
Sept 17 2021	UA 3749-33	75.2013	0.297024	12.9944	1.68873	0.040656	0.203108	1.08597	3.746	4.54917	0.250075	100	5.7261
Sept 17 2021	UA 3749-47	75.252	0.274688	13.0728	1.78066	0.0717927	0.27627	1.54153	3.51164	3.97998	0.308055	100	6.5281
Sept 17 2021	UA 3749-15	75.2754	0.252063	13.1096	1.80993	0.0625895	0.220184	1.44847	3.80977	3.80436	0.268099	100	4.698
Sept 17 2021	UA 3749-20	75.2845	0.323222	13.1523	1.75215	0.0586438	0.259811	1.45287	3.62715	3.84989	0.309217	100	5.9832
Sept 17 2021	UA 3749-45	75.3903	0.282831	13.0817	1.79464	0.0526165	0.309745	1.4373	3.65153	3.80678	0.248799	100	6.2993
Sept 17 2021	UA 3749-4	75.4323	0.328529	13.1619	1.96475	0.0290492	0.388108	1.84148	4.07891	2.62944	0.187964	100	4.3795
Sept 17 2021	UA 3749-17	75.6798	0.269837	13.0642	1.78682	0.0445868	0.286448	1.45273	3.41576	3.77927	0.284847	100	6.7414
Sept 17 2021	UA 3749-28	75.68	0.291457	12.9727	1.69952	0.0366464	0.268528	1.50035	3.63016	3.72753	0.249435	100	6.602
Sept 17 2021	UA 3749-3	75.6914	0.346207	12.9125	1.79203	0.018903	0.260611	1.35069	3.64386	3.77559	0.268864	100	4.4808
Sept 17 2021	UA 3749-24	76.6028	0.105247	13.3792	0.878314	0.0594942	0.143791	0.812198	4.15596	3.79268	0.090709	100	5.4967
Sept 17 2021	UA 3749-6	78.4422	0.134209	12.3782	1.06498	0.0873418	0.188035	1.06582	4.12213	2.4019	0.14873	100	4.457
Sept 17 2021	UA 3749-5	78.8013	0.177056	12.5548	1.05022	0.0432193	0.16099	1.0266	3.80588	2.24822	0.170125	100	6.5949
	Mean	72.3631	0.43713	14.2101	2.93406	0.0983149	0.404953	1.73009	4.51102	3.15101	0.206831	100	5.07031	48
	StDev	3.08129	0.212253	0.947404	1.19369	0.0533985	0.241212	0.608434	0.696461	0.772136	0.0620127	0	1.43206
Sept 17 2021	ID3506_007	74.1544	0.060461	12.8137	1.48397	0.082174	0.044653	0.713025	3.96073	5.05849	0.325376	98.6236	1.3764
Sept 17 2021	ID3506_008	73.9242	0.084245	13.1492	1.48769	0.046564	0.017424	0.752422	4.16833	4.90606	0.292899	98.7629	1.2371
Sept 17 2021	ID3506_009	74.2706	0.035986	13.2054	1.56121	0.050667	0.032156	0.720948	4.08007	5.17172	0.311058	99.3696	0.6304
Sept 17 2021	ID3506_010	74.4786	0.075161	13.0257	1.57215	0.075309	0.036778	0.774688	4.00924	5.10222	0.331374	99.4064	0.5936
	Mean	74.207	0.0639632	13.0485	1.52625	0.0636785	0.0327527	0.740271	4.05459	5.05962	0.315177	99.0406	0.959375
	StDev	0.23134	0.0210692	0.173598	0.0469165	0.0176971	0.0114476	0.0285651	0.0902817	0.112492	0.0171235	0.405404	0.405404
Sept 17 2021	OldCrow_009	75.3776	0.32615	13.0506	1.67291	0.076236	0.305262	1.45328	3.7279	3.80835	0.260508	100	6.556
Sept 17 2021	OldCrow_010	75.4826	0.32272	12.992	1.80965	0.0611284	0.289841	1.42421	3.66892	3.76222	0.241033	100	3.6406
Sept 17 2021	OldCrow_011	75.718	0.272269	12.986	1.58313	0.0943318	0.273984	1.47599	3.51868	3.87698	0.258967	100	5.5822
Sept 17 2021	OldCrow_012	75.6607	0.30533	13.1988	1.56056	0.0565355	0.277038	1.50034	3.45997	3.78457	0.253324	100	5.4558
Sept 17 2021	OldCrow_013	75.1241	0.379902	13.1702	1.78648	0.0499615	0.313805	1.49804	3.82239	3.63657	0.282367	100	4.008
Sept 17 2021	OldCrow_014	75.2929	0.339911	12.9419	1.70235	0.0726528	0.30227	1.50829	3.83817	3.78005	0.285967	100	3.7973
	Mean	75.4426	0.324381	13.0566	1.68585	0.0684743	0.2937	1.47669	3.67267	3.77479	0.263694	100	4.83998
	StDev	0.225003	0.0358004	0.105316	0.102119	0.0160346	0.0160785	0.0326088	0.156093	0.0786816	0.0173109	0	1.19103
Sept 17 2021	UA 3751-44	67.8538	0.602648	15.3716	4.70322	0.212144	0.656454	2.32738	5.90251	2.25128	0.153645	100	3.9234		167.7 ka
Sept 17 2021	UA 3751-14	68.1218	0.6145	15.3574	4.59197	0.14599	0.591037	2.41272	5.77281	2.28396	0.139106	100	3.63
Sept 17 2021	UA 3751-11	68.166	0.517548	15.2463	4.59366	0.194374	0.563597	2.32669	5.72027	2.50333	0.217226	100	3.7709
Sept 17 2021	UA 3751-8	68.1872	0.621139	15.338	4.57377	0.193319	0.572296	2.25625	5.77328	2.34522	0.180189	100	5.3805
Sept 17 2021	UA 3751-15	68.296	0.660487	15.204	4.58289	0.157566	0.674184	2.2237	5.67749	2.39594	0.165089	100	4.6392
Sept 17 2021	UA 3751-26	68.3912	0.586196	15.5159	4.40848	0.22763	0.582256	2.0607	5.52404	2.52228	0.234363	100	9.2567
Sept 17 2021	UA 3751-31	68.5388	0.576194	15.2024	4.38455	0.216786	0.553721	2.02817	5.99945	2.39074	0.141041	100	4.6886
Sept 17 2021	UA 3751-7	68.6302	0.70017	15.402	4.38504	0.181358	0.600091	2.13886	5.441	2.4112	0.142224	100	3.6395
Sept 17 2021	UA 3751-37	68.6883	0.62553	15.4574	4.57543	0.179614	0.657513	2.2597	4.93571	2.44821	0.222738	100	8.5953
Sept 17 2021	UA 3751-30	68.7409	0.688734	15.5964	4.38876	0.133299	0.625878	2.21929	5.07761	2.43269	0.124522	100	7.5913
Sept 17 2021	UA 3751-12	68.7684	0.672458	15.4697	4.41914	0.19051	0.585671	2.18853	5.16024	2.4248	0.155626	100	5.3551
Sept 17 2021	UA 3751-29	68.9952	0.506916	15.3835	4.12385	0.202353	0.57025	2.07559	5.45101	2.59673	0.122197	100	6.6404
Sept 17 2021	UA 3751-4	69.0417	0.594167	15.2346	4.2489	0.179486	0.536915	2.12642	5.50488	2.40019	0.171455	100	6.4203
Sept 17 2021	UA 3751-19	69.5851	0.61929	15.1208	4.06644	0.159926	0.500794	1.95687	5.35464	2.51693	0.153937	100	6.7808
Sept 17 2021	UA 3751-5	69.908	0.544704	14.9283	4.17543	0.127179	0.624613	2.61321	4.82908	2.09571	0.198636	100	3.3156
Sept 17 2021	UA 3751-9	70.0855	0.547453	14.7588	3.39045	0.079327	0.408401	1.9824	4.60616	3.99244	0.192581	100	5.1949
Sept 17 2021	UA 3751-10	70.2084	0.579044	14.9049	3.8293	0.129607	0.641078	2.73696	4.86096	2.0078	0.13166	100	1.8838
Sept 17 2021	UA 3751-13	70.281	0.491108	14.9936	4.16039	0.186712	0.352479	1.77027	5.21381	2.39338	0.203111	100	6.29
Sept 17 2021	UA 3751-38	70.829	0.550253	14.8872	3.44523	0.156388	0.437591	1.55064	5.25196	2.73687	0.200016	100	7.1096
Sept 17 2021	UA 3751-34	70.851	0.406733	14.5661	3.86731	0.169499	0.194662	1.4864	5.71456	2.59539	0.191644	100	6.2897
Sept 17 2021	UA 3751-16	71.0008	0.635086	13.7485	3.8434	0.0754737	0.524251	2.12468	4.25325	3.65781	0.176707	100	5.7394
Sept 17 2021	UA 3751-33	71.26	0.369473	14.6487	3.2353	0.128765	0.288731	1.49604	5.19354	3.20141	0.22982	100	6.3162
Sept 17 2021	UA 3751-35	71.414	0.326967	14.6398	3.87276	0.208274	0.213053	1.47181	5.1387	2.55969	0.200108	100	6.6287
Sept 17 2021	UA 3751-40	72.1366	0.569748	14.7421	3.33101	0.0778891	0.521926	1.90387	2.64444	3.91184	0.207532	100	6.6712
Sept 17 2021	UA 3751-6	72.4205	0.332974	15.8446	1.67491	0.0591164	0.571125	2.39278	4.21668	2.45065	0.0473031	100	7.2153
Sept 17 2021	UA 3751-1	72.7955	0.252221	14.0316	2.91873	0.144578	0.200563	1.10959	4.84237	3.51259	0.248085	100	7.2751
Sept 17 2021	UA 3751-3	73.3457	0.251882	14.2052	2.3962	0.0982001	0.17479	0.926091	4.92852	3.48839	0.238966	100	6.5816
Sept 17 2021	UA 3751-36	73.6052	0.407463	14.8473	3.39582	0.159588	0.356436	1.63151	2.14612	3.28015	0.22015	100	7.1923
Sept 17 2021	UA 3751-39	74.1116	0.318217	13.7035	2.01144	0.0678544	0.158505	1.02811	4.00928	4.41136	0.232619	100	6.8888
Sept 17 2021	UA 3751-47	74.1894	0.382627	14.1146	2.20507	0.11162	0.512417	2.66565	4.28293	1.40226	0.172274	100	8.8705
Sept 17 2021	UA 3751-25	74.3829	0.287544	13.5376	1.94013	0.065462	0.167105	1.01846	4.06233	4.35921	0.231523	100	5.6063
Sept 17 2021	UA 3751-42	74.3837	0.308939	13.3002	2.05388	0.0517351	0.183479	1.07219	4.1061	4.37325	0.214894	100	4.3995
Sept 17 2021	UA 3751-43	74.7616	0.366191	13.504	2.0105	0.0643752	0.50584	2.24592	3.71139	2.65071	0.231848	100	10.3226
Sept 17 2021	UA 3751-50	74.8228	0.305815	13.2485	1.61675	0.0687519	0.202573	1.16609	3.92544	4.47384	0.218734	100	5.9779
Sept 17 2021	UA 3751-17	74.9527	0.392444	13.8044	1.89247	0.0654795	0.38111	1.94293	4.71301	1.76055	0.122715	100	5.6834
Sept 17 2021	UA 3751-22	75.176	0.289191	13.1709	1.74249	0.0159504	0.190482	1.13008	3.59918	4.52116	0.212377	100	5.2999
Sept 17 2021	UA 3751-2	75.2591	0.292488	13.1375	1.72541	0.0244418	0.239971	1.13997	3.32252	4.60826	0.323406	100	10.2438
Sept 17 2021	UA 3751-49	75.2788	0.348024	13.1379	1.6811	0	0.201875	1.09995	3.72412	4.36722	0.207986	100	6.4957
Sept 17 2021	UA 3751-45	76.9201	0.132014	13.3345	0.763871	0.120263	0.0607064	0.874465	4.0021	3.68568	0.137336	100	7.2865
Sept 17 2021	UA 3751-27	77.4886	0.228587	12.6281	1.29073	0.0429901	0.219523	1.17663	3.63002	3.15436	0.181361	100	7.2111
Sept 17 2021	UA 3751-21	77.5706	0.286702	12.6071	1.20921	0.0523192	0.191476	1.18886	3.7648	3.01068	0.152876	100	5.4095
Sept 17 2021	UA 3751-46	77.6817	0.179523	12.8687	1.62777	0.0561364	0.304604	1.69024	3.88514	1.56586	0.181272	100	6.8466
Sept 17 2021	UA 3751-48	77.6921	0.210479	12.5361	1.18862	0.0472219	0.156823	1.16766	3.98007	2.91073	0.142173	100	6.7127
Sept 17 2021	UA 3751-28	77.8347	0.178333	12.6532	1.22703	0	0.134783	1.12862	3.92669	2.81672	0.129086	100	6.0741
Sept 17 2021	UA 3751-18	78.0798	0.273766	11.978	1.2688	0.0450434	0.232046	1.4134	3.31157	3.27159	0.16246	100	5.4068
Sept 17 2021	UA 3751-20	78.2479	0.189643	12.4964	1.12328	0.100286	0.173317	1.08756	4.05924	2.40716	0.148786	100	5.3995
Sept 17 2021	UA 3751-32	78.5236	0.202111	12.2461	1.04287	0.042696	0.170533	1.13258	4.02186	2.47106	0.18924	100	6.5065
Sept 17 2021	UA 3751-23	78.7204	0.133722	12.2992	1.03385	0.0117375	0.15586	1.05808	3.98694	2.46516	0.174339	100	6.2153
Sept 17 2021	UA 3751-24	78.8782	0.168524	12.2651	1.04485	0	0.176919	1.01967	4.00053	2.33214	0.147245	100	7.0688
	Mean	72.7572	0.414816	14.1473	2.88332	0.110802	0.377557	1.69886	4.55429	2.91483	0.182127	100	6.20288	49
	StDev	3.63607	0.173733	1.14843	1.34707	0.0671656	0.192154	0.553253	0.891429	0.830324	0.0455907	0	1.65896
Sept 17 2021	ID3506_011	73.6042	0.035134	12.8644	1.6222	0.023375	0.043837	0.725617	4.1022	5.06518	0.311854	98.3276	1.6724
Sept 17 2021	ID3506_012	74.224	0.073732	13.1305	1.5054	0.071523	0.034335	0.728017	3.98931	5.12342	0.293544	99.1075	0.8925
Sept 17 2021	ID3506_013	73.815	0.056663	13.2447	1.65565	0.068753	0.056742	0.737086	4.04483	5.06645	0.309839	98.9858	1.0142
Sept 17 2021	ID3506_014	73.8726	0.0724	13.1508	1.53122	0.04401	0.032945	0.752355	4.04165	5.05935	0.300692	98.7902	1.2098
	Mean	73.879	0.0594823	13.0976	1.57862	0.0519152	0.0419647	0.735769	4.0445	5.0786	0.303982	98.8028	1.19722	4
	StDev	0.257343	0.017988	0.163231	0.0717421	0.0226937	0.0109764	0.0121104	0.0461283	0.0300395	0.00848624	0.342688	0.342688
Sept 17 2021	OldCrow_015	75.4084	0.3758	12.9992	1.69425	0.0452601	0.27266	1.49414	3.84347	3.66451	0.261266	100	2.7378
Sept 17 2021	OldCrow_016	75.2482	0.23484	13.058	1.70034	0.052437	0.250611	1.46709	3.99145	3.78266	0.276635	100	5.5647
Sept 17 2021	OldCrow_017	75.5507	0.290323	12.8884	1.62837	0.0819689	0.291601	1.45845	3.84072	3.76949	0.258147	100	4.3247
Sept 17 2021	OldCrow_018	75.4792	0.298238	13.0927	1.64879	0.0668724	0.315704	1.41323	3.69067	3.78414	0.271816	100	5.3676
Sept 17 2021	OldCrow_019	75.227	0.371133	13.0244	1.69794	0.0963828	0.266766	1.44495	3.88237	3.79535	0.250183	100	2.9412
Sept 17 2021	OldCrow_020	75.4219	0.301099	13.1548	1.63916	0.0289277	0.280712	1.45959	3.76709	3.73312	0.275836	100	4.8802
Sept 17 2021	OldCrow_021	76.8067	0.246431	13.0601	1.75197	0.0410426	0.29549	1.54294	2.13466	3.92111	0.257754	100	6.1025
Sept 17 2021	OldCrow_022	75.9522	0.294614	12.7523	1.6636	0.021641	0.25665	1.41979	3.74925	3.68012	0.270935	100	4.6161
	Mean	75.6368	0.30156	13.0037	1.67805	0.0543166	0.278774	1.46252	3.61246	3.76631	0.265322	100	4.56685	8
	StDev	0.523412	0.0507492	0.127527	0.0408206	0.0258178	0.0216324	0.0415369	0.604104	0.0795474	0.00975839	0	1.20372
Sept 17 2021	UA 3752-50	67.6141	0.647339	15.6189	4.8582	0.237431	0.716895	2.41149	5.49777	2.24032	0.203394	100	7.0499		201.8 ka
Sept 17 2021	UA 3752-44	68.7414	0.636171	15.5409	4.49427	0.181782	0.635499	2.20664	5.03642	2.39065	0.176002	100	6.474
Sept 17 2021	UA 3752-3	68.875	0.540229	15.1387	4.39512	0.204237	0.535082	2.13739	5.60643	2.44607	0.157339	100	2.1007
Sept 17 2021	UA 3752-8	68.8758	0.530831	15.6614	4.38908	0.223731	0.539454	2.0949	5.39369	2.16201	0.166796	100	5.1421
Sept 17 2021	UA 3752-10	68.8819	0.592431	15.3997	4.11203	0.211075	0.577408	2.03292	5.56444	2.49889	0.166884	100	4.6289
Sept 17 2021	UA 3752-33	68.9647	0.636347	15.321	4.04864	0.171215	0.566396	2.01301	5.68304	2.46262	0.171954	100	3.1829
Sept 17 2021	UA 3752-11	69.3461	0.646574	15.1371	4.35091	0.129694	0.46584	2.1347	4.57174	3.04871	0.217725	100	9.1971
Sept 17 2021	UA 3752-32	69.519	0.526284	15.0891	4.29669	0.208989	0.556766	1.99523	5.38196	2.27678	0.192784	100	3.0056
Sept 17 2021	UA 3752-41	69.7659	0.467256	15.4839	3.85089	0.221333	0.390926	1.7073	5.71206	2.27419	0.163078	100	6.4436
Sept 17 2021	UA 3752-24	69.8759	0.542593	15.4076	4.39441	0.193947	0.502485	2.09203	4.34004	2.54568	0.135906	100	6.0721
Sept 17 2021	UA 3752-39	70.7282	0.403771	15.1913	3.81897	0.196802	0.33315	1.60517	5.20616	2.35784	0.204894	100	8.0226
Sept 17 2021	UA 3752-20	70.7926	0.501286	15.184	3.42697	0.220761	0.378284	1.55376	5.0699	2.72293	0.193025	100	6.2289
Sept 17 2021	UA 3752-25	70.8231	0.415466	14.9983	3.28197	0.161849	0.372396	1.57881	5.60184	2.60875	0.203455	100	5.9489
Sept 17 2021	UA 3752-30	71.3757	0.461465	14.8198	3.44968	0.133246	0.384393	1.49386	4.93097	2.82085	0.167933	100	7.3694
Sept 17 2021	UA 3752-38	71.652	0.606668	14.5244	2.83024	0.162822	0.549058	1.74977	4.9602	2.8394	0.161935	100	6.4019
Sept 17 2021	UA 3752-5	71.8806	0.40828	14.5425	3.57579	0.186926	0.148129	1.29965	5.10618	2.63941	0.274518	100	8.3109
Sept 17 2021	UA 3752-1	72.4171	0.353522	14.7794	2.87018	0.0903579	0.287872	1.27037	4.4672	3.31016	0.198709	100	8.8182
Sept 17 2021	UA 3752-14	73.1186	0.37205	14.1745	2.30503	0.0318134	0.290701	1.29602	3.80083	4.42194	0.24349	100	9.3464
Sept 17 2021	UA 3752-12	73.1562	0.36727	13.6436	2.6157	0.0397738	0.22525	1.31969	3.84686	4.60402	0.234463	100	6.793
Sept 17 2021	UA 3752-13	73.2239	0.498717	14.3934	2.24467	0.0923773	0.348639	1.14668	4.96059	2.98686	0.134549	100	7.8009
Sept 17 2021	UA 3752-18	73.3308	0.209618	15.4095	1.478	0.0840256	0.520999	1.99502	4.2624	2.67634	0.0429055	100	6.6927
Sept 17 2021	UA 3752-29	73.4642	0.494804	15.3398	3.38003	0.168011	0.374263	1.58543	2.28908	2.74708	0.203215	100	7.7028
Sept 17 2021	UA 3752-35	73.785	0.244913	13.9905	2.41017	0.0808217	0.137405	0.904228	4.43418	3.77318	0.309332	100	8.2165
Sept 17 2021	UA 3752-37	74.1922	0.254587	13.4332	1.96507	0.0733357	0.199983	1.06595	4.24796	4.36792	0.257925	100	6.2708
Sept 17 2021	UA 3752-16	74.5678	0.218429	13.3331	2.00602	0.0530303	0.198238	1.0402	4.16566	4.22128	0.253527	100	6.7081
Sept 17 2021	UA 3752-40	74.6178	0.297075	13.2976	1.9587	0.0605464	0.150083	0.798959	4.1237	4.5017	0.250368	100	4.5971
Sept 17 2021	UA 3752-6	75.0766	0.281162	13.0736	1.74925	0.0695616	0.193725	1.18684	3.81189	4.386	0.221178	100	5.1316
Sept 17 2021	UA 3752-47	75.1828	0.335978	13.1965	1.53367	0.0249879	0.209008	1.13605	3.87548	4.22649	0.360515	100	6.2828
Sept 17 2021	UA 3752-42	75.242	0.329861	13.1026	1.75579	0.00147937	0.17272	1.14044	3.79861	4.24565	0.27234	100	6.9201
Sept 17 2021	UA 3752-49	76.1179	0.237974	12.5454	1.44755	0.0628508	0.199922	1.24235	3.27995	4.55919	0.396451	100	5.7069
Sept 17 2021	UA 3752-31	76.1219	0.197316	13.1808	1.52808	0.091881	0.346849	1.87938	3.95176	2.56111	0.181979	100	5.641
Sept 17 2021	UA 3752-45	76.3672	0.203375	13.4927	0.781843	0.0629718	0.150191	0.808586	4.23282	3.82481	0.0973626	100	5.8468
Sept 17 2021	UA 3752-19	76.8584	0.0351345	13.389	0.731529	0.176819	0.0841811	0.864065	3.97433	3.78423	0.132024	100	7.3474
Sept 17 2021	UA 3752-9	76.9014	0.126393	13.4593	0.817027	0.132273	0.0767675	0.856724	3.89521	3.65153	0.107637	100	7.3605
Sept 17 2021	UA 3752-34	76.9089	0.112432	13.3036	0.739884	0.115092	0.0613092	0.832392	4.11052	3.73734	0.101411	100	6.6616
Sept 17 2021	UA 3752-27	76.9118	0.0957748	13.4002	0.849024	0.155266	0.079907	0.832559	3.89388	3.67811	0.133659	100	6.8868
Sept 17 2021	UA 3752-23	77.0282	0.0902946	13.3284	0.784312	0.150607	0.0771513	0.905103	3.96239	3.58053	0.12015	100	5.8227
Sept 17 2021	UA 3752-22	77.1198	0.0515792	13.2271	0.817535	0.120633	0.064193	0.89112	3.69929	3.91237	0.124529	100	7.5616
Sept 17 2021	UA 3752-48	77.1629	0.242009	13.3633	1.24154	0.142264	0.27983	1.35776	3.8681	2.26164	0.104319	100	6.9374
Sept 17 2021	UA 3752-7	77.1757	0.0725275	13.0574	0.744674	0.147259	0.0820336	0.846153	3.78361	4.01655	0.0955926	100	6.4907
Sept 17 2021	UA 3752-21	77.4303	0.0835032	13.0787	0.768328	0.168691	0.0344	0.866582	3.7468	3.75137	0.092026	100	6.1222
Sept 17 2021	UA 3752-4	77.5001	0.121397	12.9067	0.738843	0	0.0825433	0.578308	3.68743	4.29094	0.120994	100	5.727
Sept 17 2021	UA 3752-15	77.5798	0.0713038	13.0139	0.821613	0.151679	0.0788417	0.870456	3.62594	3.71356	0.094213	100	8.3163
Sept 17 2021	UA 3752-17	78.3239	0.192523	12.5903	1.16639	0.0427809	0.173612	1.07082	3.9416	2.39466	0.133618	100	6.6522
Sept 17 2021	UA 3752-26	78.5169	0.253921	12.3601	1.09195	0.037974	0.192202	1.05403	3.94383	2.40942	0.18042	100	5.7012
Sept 17 2021	UA 3752-2	78.7076	0.16761	12.2132	1.07574	0.0809166	0.157195	1.04938	4.05475	2.39133	0.132113	100	6.3517
Sept 17 2021	UA 3752-43	78.7373	0.182225	12.1803	1.13426	0.0370263	0.151254	1.04806	4.19936	2.21327	0.15095	100	6.8825
Sept 17 2021	UA 3752-28	78.881	0.0379479	13.3049	0.796439	0.141761	0.0733918	0.911308	2.10905	3.65099	0.120484	100	7.6681
Sept 17 2021	UA 3752-46	79.8513	0.164738	12.4891	1.02495	0.0957685	0.170584	1.0631	2.64284	2.3525	0.187332	100	7.7755
	UA 3752-36	80.9246	0.244486	12.4569	1.11466	0.0296717	0.170581	1.08966	1.39674	2.4393	0.172364	100	7.0664
	Mean	74.2043	0.316109	13.9313	2.24125	0.121203	0.27496	1.33821	4.23495	3.19957	0.178395	100	6.54774	50
	StDev	3.55409	0.187644	1.09502	1.36685	0.0659905	0.183051	0.48057	0.922705	0.812461	0.069578	0	1.43702
Sept 17 2021	ID3506_015	74.3013	0.070091	12.8792	1.49729	0.059253	0.024124	0.719432	4.0359	5.12163	0.323331	98.9586	1.0414
Sept 17 2021	ID3506_016	74.4131	0.079986	13.0142	1.56021	0.038577	0.026125	0.772611	4.06361	5.00784	0.350008	99.2473	0.7527
Sept 17 2021	ID3506_017	74.2272	0.101591	12.8802	1.68047	0.070271	0.046109	0.70903	4.03264	5.19589	0.333516	99.2017	0.7983
Sept 17 2021	ID3506_018	74.3106	0.083945	12.9122	1.50244	0.084064	0.024236	0.717129	3.98089	5.14551	0.299768	98.9931	1.0069
	Mean	74.3131	0.0839032	12.9215	1.5601	0.0630412	0.0301485	0.72955	4.02826	5.11772	0.326656	99.1002	0.899825	4
	StDev	0.0764292	0.0131527	0.0637044	0.085164	0.01921	0.0106799	0.0290515	0.0345017	0.079523	0.0210269	0.145444	0.145444
Sept 17 2021	OldCrow_023	76.8732	0.247686	13.1403	1.72372	0.0658768	0.24708	1.52013	2.13654	3.82968	0.278653	100	5.8106
Sept 17 2021	OldCrow_024	76.7477	0.287936	13.1333	1.80435	0.04511	0.283648	1.54594	2.17897	3.76975	0.262661	100	8.2931
Sept 17 2021	OldCrow_025	75.4344	0.354109	13.1232	1.72652	0.0454184	0.291506	1.49268	3.53516	3.75238	0.315909	100	5.9081
Sept 17 2021	OldCrow_026	75.6116	0.312947	13.0534	1.72437	0.0536408	0.290757	1.54652	3.40741	3.76282	0.305431	100	2.3336
Sept 17 2021	OldCrow_027	75.4235	0.24996	13.1153	1.64774	0.0259797	0.254984	1.46682	3.83	3.8021	0.236949	100	4.4562
Sept 17 2021	OldCrow_028	75.4258	0.253863	13.0018	1.75895	0.0662796	0.239442	1.44772	3.91664	3.6713	0.28177	100	4.3114
Sept 17 2021	OldCrow_029	75.0015	0.368799	13.0819	1.74841	0.073262	0.244316	1.48663	3.80848	3.95683	0.296747	100	4.0185
Sept 17 2021	OldCrow_030	75.4145	0.299136	13.0218	1.67118	0.102811	0.248905	1.50035	3.76979	3.73881	0.300573	100	2.0908
	Mean	75.7415	0.296805	13.0839	1.72565	0.0597972	0.26258	1.50085	3.32287	3.78546	0.284837	100	4.65279	8
	StDev	0.682383	0.0466947	0.053048	0.0490819	0.0230354	0.022131	0.0353355	0.738087	0.0833744	0.0256675	0	2.02372
Sept 17 2021	UA 3750-28	67.9525	0.665834	15.4428	4.57942	0.225502	0.568662	2.21761	5.75011	2.46638	0.169385	100	6.1512		141.6 ka
Sept 17 2021	UA 3750-40	69.9106	0.450342	15.0478	3.96058	0.138518	0.420771	1.68778	5.57042	2.67881	0.173636	100	4.7083
Sept 17 2021	UA 3750-49	70.1524	0.477284	14.9237	3.83145	0.201173	0.41446	1.66737	5.53559	2.65975	0.176573	100	5.672
Sept 17 2021	UA 3750-18	70.9389	0.543991	15.0309	3.85753	0.188192	0.342928	1.61629	4.83942	2.47883	0.21045	100	8.5925
Sept 17 2021	UA 3750-48	70.992	0.351217	14.7765	3.18211	0.121345	0.425274	1.57456	5.09782	3.31646	0.210046	100	6.9997
Sept 17 2021	UA 3750-39	71.5021	0.373867	14.8439	3.10844	0.121557	0.252465	1.36076	4.67261	3.5355	0.295602	100	7.1387
Sept 17 2021	UA 3750-35	71.5559	0.605249	14.5356	2.69915	0.0802962	0.524327	1.8679	4.9698	2.94164	0.284258	100	7.3431
Sept 17 2021	UA 3750-15	71.5709	0.419388	14.7455	2.93049	0.0864954	0.349558	1.64271	4.63889	3.42208	0.250497	100	6.0389
Sept 17 2021	UA 3750-2	72.853	0.293398	14.3903	2.55026	0.133522	0.200889	1.05371	4.65343	3.67856	0.249201	100	7.1744
Sept 17 2021	UA 3750-7	73.1462	0.25916	14.2731	2.55847	0.0723549	0.137721	0.995261	4.72654	3.63748	0.250345	100	6.6822
Sept 17 2021	UA 3750-3	74.1759	0.288259	13.5203	2.55833	0.0621444	0.258239	1.3912	4.86207	2.75411	0.167071	100	6.8781
Sept 17 2021	UA 3750-1	74.2571	0.363366	13.7927	2.57407	0.0747898	0.19285	1.35142	4.57611	2.67634	0.182344	100	7.8992
Sept 17 2021	UA 3750-36	74.2974	0.415644	13.8754	1.86574	0.107837	0.348628	1.51273	4.59247	2.88905	0.122664	100	6.5767
Sept 17 2021	UA 3750-4	74.3347	0.320651	13.5749	2.62779	0.0830781	0.200468	1.3714	4.57002	2.80709	0.142002	100	7.1199
Sept 17 2021	UA 3750-41	74.5405	0.289041	13.4133	2.54558	0.118931	0.20359	1.35177	4.66882	2.745	0.159407	100	6.1112
Sept 17 2021	UA 3750-42	74.7282	0.350145	13.5865	2.52028	0.0619227	0.226989	1.32327	4.28208	2.81386	0.13799	100	6.4931
Sept 17 2021	UA 3750-32	74.8272	0.47703	12.9883	2.23538	0.0263277	0.38042	1.76442	3.91576	3.23585	0.192776	100	21.3793
Sept 17 2021	UA 3750-26	74.851	0.272966	13.7544	2.59411	0.0921716	0.217782	1.43108	3.9055	2.73621	0.18694	100	7.2057
Sept 17 2021	UA 3750-34	74.8653	0.329426	13.1947	1.79246	0.0642866	0.335814	1.51066	3.6964	3.99677	0.27677	100	7.6775
Sept 17 2021	UA 3750-29	74.8751	0.324694	13.1509	1.76556	0.061994	0.293328	1.4929	3.80542	3.99985	0.297447	100	6.4732
Sept 17 2021	UA 3750-21	75.0143	0.267311	13.1164	1.8733	0.0460198	0.268533	1.43714	3.78361	3.93718	0.330902	100	10.0169
Sept 17 2021	UA 3750-24	75.0152	0.319001	13.2355	1.75228	0.0102015	0.297783	1.54367	3.90885	3.70782	0.270953	100	5.2689
Sept 17 2021	UA 3750-50	75.02	0.370819	13.0673	1.72128	0.0500389	0.266405	1.52169	3.80795	3.93708	0.306657	100	6.2449
Sept 17 2021	UA 3750-25	75.107	0.314773	13.0311	1.75014	0.0993806	0.270896	1.5649	3.90039	3.74711	0.276859	100	6.9205
Sept 17 2021	UA 3750-10	75.1414	0.321124	13.216	2.47825	0.0488957	0.23506	1.30781	4.42083	2.70874	0.157439	100	6.9202
Sept 17 2021	UA 3750-14	75.1464	0.281977	13.2293	1.75511	0.029531	0.237804	1.48796	3.68501	3.93105	0.278781	100	6.5118
Sept 17 2021	UA 3750-13	75.17	0.321756	13.2631	1.71316	0.0506104	0.296174	1.4182	3.77864	3.77414	0.276698	100	7.2661
Sept 17 2021	UA 3750-43	75.1775	0.315345	13.2194	1.70446	0.0683978	0.247996	1.46519	3.6155	3.97584	0.271712	100	5.1724
Sept 17 2021	UA 3750-31	75.2114	0.365737	13.1556	1.84958	0.0504829	0.260197	1.44597	3.71641	3.76167	0.236219	100	7.0319
Sept 17 2021	UA 3750-8	75.2201	0.372218	13.2745	1.73303	0.0615037	0.258655	1.47636	3.60007	3.80934	0.250774	100	8.0104
Sept 17 2021	UA 3750-37	75.252	0.355303	13.1925	1.76377	0.0235709	0.290603	1.4683	3.76252	3.68524	0.266356	100	6.304
Sept 17 2021	UA 3750-33	75.2583	0.235525	13.1401	1.70562	0.0596249	0.2587	1.4746	3.65245	3.97294	0.312721	100	5.0682
Sept 17 2021	UA 3750-20	75.2594	0.321936	13.0946	1.7477	0.0747507	0.257198	1.43177	3.8242	3.76551	0.287823	100	5.8096
Sept 17 2021	UA 3750-23	75.2657	0.316897	13.2373	1.69412	0.065577	0.280994	1.41667	3.58596	3.9197	0.280396	100	7.3517
Sept 17 2021	UA 3750-5	75.2734	0.257276	13.2396	1.74542	0.0817626	0.293574	1.52381	3.43249	3.92695	0.291707	100	7.1874
Sept 17 2021	UA 3750-47	75.2792	0.320796	13.3398	1.72221	0.0430013	0.269146	1.3882	3.68325	3.73387	0.284818	100	6.9424
Sept 17 2021	UA 3750-17	75.2848	0.349842	13.0806	1.75279	0.033786	0.236315	1.44043	3.78961	3.80675	0.290594	100	6.0174
Sept 17 2021	UA 3750-46	75.334	0.292944	13.0683	1.71189	0.0571314	0.235694	1.48208	3.70957	3.8991	0.270298	100	5.8083
Sept 17 2021	UA 3750-51	75.3389	0.240372	13.0453	1.72771	0.0712333	0.247092	1.54155	3.73008	3.81561	0.312696	100	7.0294
Sept 17 2021	UA 3750-16	75.3389	0.268095	13.1603	1.75746	0.0749471	0.247982	1.52056	3.68983	3.73284	0.26991	100	6.0657
Sept 17 2021	UA 3750-19	75.4131	0.284951	13.2359	1.65822	0.0693909	0.240265	1.4538	3.68975	3.73088	0.288859	100	6.4733
Sept 17 2021	UA 3750-38	75.4348	0.257066	13.1569	1.6296	0.0662261	0.253941	1.43481	3.65933	3.88523	0.286927	100	6.2016
Sept 17 2021	UA 3750-22	75.4742	0.261362	13.1087	1.75483	0.0176464	0.23762	1.4605	3.76745	3.71961	0.255901	100	6.0998
Sept 17 2021	UA 3750-44	75.4888	0.280531	13.0305	1.6657	0.0735341	0.272982	1.44821	3.73355	3.79684	0.270332	100	6.1673
Sept 17 2021	UA 3750-45	75.5348	0.278281	12.8928	1.71221	0.0867133	0.267799	1.44585	3.71462	3.91058	0.202046	100	6.1055
Sept 17 2021	UA 3750-27	76.0687	0.109579	14.2869	0.976213	0.131913	0.285122	1.72401	4.05234	2.28516	0.103323	100	7.7701
Sept 17 2021	UA 3750-11	76.7948	0.0686295	13.4507	0.823666	0.137249	0.061467	0.874905	4.02187	3.70728	0.0769905	100	7.3795
Sept 17 2021	UA 3750-6	77.1688	0.0341884	13.257	0.755408	0.129598	0.0647498	0.858636	3.91109	3.72043	0.129232	100	7.1704
Sept 17 2021	UA 3750-30	77.9138	0.0951098	12.817	1.19372	0.0390725	0.154284	1.09534	4.13787	2.41757	0.175845	100	8.0147
Sept 17 2021	UA 3750-9	78.6939	0.154113	12.4212	1.0693	0.0537105	0.170067	1.09496	3.76245	2.46335	0.150994	100	7.3551
Sept 17 2021	UA 3750-12	78.8037	0.138671	12.181	0.990441	0.0326541	0.155263	1.06292	4.06165	2.4547	0.153575	100	6.8449
	Mean	74.573	0.314558	13.5315	2.08286	0.0796195	0.268932	1.44109	4.13566	3.39431	0.230466	100	7.03618	51
	StDev	2.08133	0.118078	0.721486	0.802357	0.0452244	0.0930234	0.232553	0.573804	0.564446	0.0646239	0	2.24756
Sept 17 2021	ID3506_019	73.9602	0.060852	12.8386	1.60464	0.07173	0.018077	0.747158	4.01956	5.18333	0.34167	98.7687	1.2313
Sept 17 2021	ID3506_020	74.06	0.063855	12.9949	1.65457	0.04139	0.048393	0.733943	3.90982	5.29234	0.287156	99.0215	0.9785
Sept 17 2021	ID3506_021	73.9406	0.08304	13.198	1.46619	0.078654	0.05837	0.705105	3.81324	5.26802	0.28518	98.8321	1.1679
Sept 17 2021	ID3506_022	74.5876	0.051712	13.0774	1.54592	0.051064	0.028014	0.723286	4.04015	5.13734	0.302833	99.477	0.523
Sept 17 2021	ID3506_023	74.1558	0.125144	13.0012	1.56553	0.088312	0.007531	0.773781	4.07755	5.16445	0.32739	99.2128	0.7872
	Mean	74.1408	0.0769206	13.022	1.56737	0.06623	0.032077	0.736655	3.97206	5.2091	0.308846	99.0624	0.93758	5
	StDev	0.26414	0.0292717	0.131194	0.0701673	0.0194888	0.0210508	0.0258367	0.108534	0.0674679	0.0249399	0.289605	0.289605
Sept 17 2021	OldCrow_031	75.6155	0.271487	13.032	1.64557	0.0453545	0.24506	1.48579	3.65864	3.82278	0.22966	100	5.6235
Sept 17 2021	OldCrow_032	75.6396	0.349201	12.9942	1.74392	0.0190728	0.241112	1.46093	3.56329	3.7602	0.295021	100	5.8973
Sept 17 2021	OldCrow_033	76.49	0.315213	13.3837	1.74247	0.0469189	0.290592	1.53002	2.29333	3.71587	0.247772	100	2.8536
Sept 17 2021	OldCrow_034	75.3121	0.357908	13.0803	1.64058	0.0566131	0.303306	1.4594	3.71289	3.87535	0.260362	100	4.8666
Sept 17 2021	OldCrow_035	75.1486	0.308658	13.2381	1.7046	0.0862375	0.258945	1.54982	3.80122	3.7084	0.252393	100	5.5225
Sept 17 2021	OldCrow_036	75.2317	0.345733	13.0109	1.73922	0.060723	0.260085	1.49284	3.88067	3.76641	0.273436	100	6.752
Sept 17 2021	OldCrow_037	75.5543	0.315927	13.0148	1.64605	0.0393528	0.26008	1.4622	3.74089	3.74538	0.285503	100	5.2189
Sept 17 2021	OldCrow_038	75.3728	0.364414	13.061	1.79499	0.0529942	0.280391	1.46493	3.74764	3.66406	0.25427	100	6.1596
	Mean	75.5456	0.328568	13.1019	1.70718	0.0509083	0.267446	1.48824	3.54982	3.75731	0.262302	100	5.36175	8
	StDev	0.42194	0.0313026	0.137559	0.0577054	0.0191802	0.0219237	0.0345658	0.516262	0.0668246	0.0213002	0	1.16539
Sept 17 2021	UA 3753-5	62.9942	0.684822	22.1045	4.1615	0.133967	0.647238	2.0485	4.76477	2.19382	0.344433	100	13.8197		210.0 ka
Sept 17 2021	UA 3753-36	67.5161	0.592761	14.7115	5.60533	0.291088	0.582616	2.71214	5.35373	2.47897	0.201186	100	5.4117
Sept 17 2021	UA 3753-30	67.8848	0.653271	15.6541	4.58371	0.184505	0.671826	2.25111	5.58519	2.39261	0.179259	100	5.143
Sept 17 2021	UA 3753-50	68.1175	0.793031	14.9919	5.00674	0.167673	0.668558	2.32419	5.26034	2.55409	0.149837	100	2.9573
Sept 17 2021	UA 3753-39	68.1881	0.646129	15.1983	4.63992	0.180753	0.66368	2.23629	5.79871	2.32949	0.153334	100	3.1369
Sept 17 2021	UA 3753-43	68.3351	0.625156	15.5597	4.65017	0.191013	0.658873	2.23845	5.22061	2.41363	0.138462	100	7.5846
Sept 17 2021	UA 3753-11	68.4726	0.610248	15.0865	4.62158	0.192711	0.59589	2.19217	5.75348	2.35412	0.155908	100	4.3654
Sept 17 2021	UA 3753-21	68.506	0.641934	15.4859	4.45025	0.141804	0.587748	2.20081	5.43389	2.43557	0.149952	100	3.8231
Sept 17 2021	UA 3753-16	68.674	0.652463	15.4559	4.57955	0.222472	0.613802	2.22631	5.12263	2.31982	0.171674	100	2.8529
Sept 17 2021	UA 3753-27	68.7509	0.734837	15.3879	4.52905	0.189594	0.615809	2.17807	5.11761	2.38203	0.147357	100	6.949
Sept 17 2021	UA 3753-13	68.79	0.496917	15.3334	4.50624	0.192991	0.493033	2.01016	5.46825	2.59633	0.145425	100	7.311
Sept 17 2021	UA 3753-20	68.8594	0.59122	15.2647	4.44879	0.188536	0.612554	2.04493	5.53687	2.33357	0.154183	100	5.7495
Sept 17 2021	UA 3753-31	68.9978	0.608401	15.1267	4.313	0.146625	0.565077	2.02741	5.69323	2.38101	0.181797	100	4.0807
Sept 17 2021	UA 3753-26	69.0196	0.623721	15.2928	3.892	0.161791	0.62438	2.07416	5.47571	2.67751	0.20455	100	6.2038
Sept 17 2021	UA 3753-38	69.331	0.530871	15.444	4.04732	0.186026	0.498529	1.8326	5.45867	2.52633	0.186802	100	6.5495
Sept 17 2021	UA 3753-10	69.5901	0.575214	15.3055	3.98042	0.203295	0.521177	1.86622	5.18617	2.49753	0.354367	100	18.0948
Sept 17 2021	UA 3753-34	70.918	0.414991	14.7296	3.75525	0.103505	0.349221	1.73797	5.0034	2.82977	0.204386	100	7.9834
Sept 17 2021	UA 3753-49	71.264	0.365875	14.8563	3.24555	0.110688	0.283749	1.38656	4.99722	3.29661	0.249754	100	7.5893
Sept 17 2021	UA 3753-7	72.0194	0.465867	14.8053	2.79422	0.205476	0.486959	2.28527	4.7724	1.99029	0.225787	100	6.7044
Sept 17 2021	UA 3753-45	72.1757	0.500936	15.0123	2.28053	0.0791264	0.486269	1.50873	5.00726	2.90316	0.0592885	100	7.2838
Sept 17 2021	UA 3753-9	72.3651	0.529217	14.5123	2.80433	0.152383	0.512321	2.26865	4.45741	2.20509	0.249563	100	8.5815
Sept 17 2021	UA 3753-40	72.5244	0.528018	14.3702	2.29041	0.120199	0.343337	1.18695	5.38578	3.07815	0.22291	100	5.6355
Sept 17 2021	UA 3753-46	72.8184	0.449632	14.3373	2.22435	0.0645668	0.354875	1.33429	5.02768	3.35988	0.0373683	100	5.6527
Sept 17 2021	UA 3753-35	74.0469	0.316724	13.4157	2.05265	0.0966104	0.169235	1.04328	4.19692	4.45917	0.261956	100	4.0445
Sept 17 2021	UA 3753-1	74.2626	0.271881	14.7408	1.40614	0.0236951	0.410732	1.75199	4.20157	2.89192	0.0498933	100	6.6769
Sept 17 2021	UA 3753-48	74.277	0.33269	13.4163	2.04612	0.0455575	0.181273	1.02058	4.01945	4.50021	0.207747	100	5.7675
Sept 17 2021	UA 3753-4	74.3402	0.314703	13.3008	1.99664	0.057878	0.190653	1.05992	4.02673	4.51757	0.251621	100	6.9854
Sept 17 2021	UA 3753-28	74.4203	0.340058	13.4708	1.88337	0.0947502	0.162356	0.996681	4.1564	4.3029	0.22254	100	6.5321
Sept 17 2021	UA 3753-41	74.4996	0.30205	13.5513	2.01974	0.0343675	0.198751	1.02058	3.95812	4.24227	0.223623	100	7.3368
Sept 17 2021	UA 3753-47	74.8012	0.330899	13.3012	2.01446	0.016469	0.227681	1.03269	3.92982	4.15278	0.248787	100	7.4808
Sept 17 2021	UA 3753-8	76.427	0.245896	12.9268	1.56417	0.00653269	0.213768	1.27693	3.79481	3.23164	0.403678	100	15.3794
Sept 17 2021	UA 3753-37	76.6641	0.0619557	13.5214	0.788381	0.17479	0.0766341	0.904949	4.07662	3.65061	0.103952	100	7.9665
Sept 17 2021	UA 3753-23	76.7583	0.0486537	13.6003	0.761723	0.159575	0.0641724	0.864867	3.90847	3.74832	0.11058	100	7.9495
Sept 17 2021	UA 3753-42	76.9168	0.0857719	13.2485	0.820277	0.147049	0.0867043	0.940372	4.01713	3.65734	0.103527	100	7.5455
Sept 17 2021	UA 3753-17	77.0006	0.0261693	13.2523	0.782432	0.170221	0.065297	0.904012	3.55543	4.13179	0.144386	100	8.0677
Sept 17 2021	UA 3753-3	77.0198	0.101503	13.4154	0.815561	0.1653	0.0765187	0.892526	3.80234	3.6142	0.124977	100	7.9545
Sept 17 2021	UA 3753-14	77.069	0.0579729	13.4251	0.736687	0.169682	0.0747457	0.886363	3.66779	3.84039	0.0933814	100	7.8328
Sept 17 2021	UA 3753-24	77.077	0.0932723	13.1997	0.808759	0.192594	0.0705041	0.880975	4.02197	3.5653	0.116198	100	7.8891
Sept 17 2021	UA 3753-29	77.0809	0.0949521	13.2837	0.775362	0.148781	0.0906563	0.926255	3.76352	3.7442	0.118284	100	7.7472
Sept 17 2021	UA 3753-19	77.1279	0.0865732	13.1738	0.828881	0.164144	0.0708468	0.864409	4.00457	3.5663	0.145429	100	7.1814
Sept 17 2021	UA 3753-33	77.1298	0.0653538	13.1144	0.747785	0.152622	0.0886162	0.879411	3.9168	3.82104	0.108803	100	7.3397
Sept 17 2021	UA 3753-44	77.1592	0.0420202	13.2237	0.770457	0.150342	0.0913097	0.859225	4.00266	3.61201	0.115048	100	7.7086
Sept 17 2021	UA 3753-32	77.1645	0.102474	13.0588	0.760459	0.156675	0.0465848	0.867123	3.76881	3.96205	0.145361	100	7.0898
Sept 17 2021	UA 3753-15	77.2796	0.0194787	13.0769	0.735479	0.123519	0.0640928	0.851164	3.96371	3.82476	0.0791791	100	6.9755
Sept 17 2021	UA 3753-6	77.2935	0.0814891	13.3268	0.869235	0.13346	0.068562	0.828242	3.8094	3.49797	0.118034	100	7.7521
Sept 17 2021	UA 3753-12	77.5453	0.0465199	12.9721	0.78607	0.193558	0.0770493	0.903526	3.65092	3.74479	0.103445	100	7.7707
Sept 17 2021	UA 3753-2	77.9001	0.219894	12.7006	1.23579	0.0426269	0.230569	1.11275	4.37457	2.09672	0.111525	100	5.8974
Sept 17 2021	UA 3753-22	77.9726	0.182374	12.7516	1.1536	0.0854129	0.18697	1.05112	4.16417	2.30124	0.194792	100	7.528
Sept 17 2021	UA 3753-18	78.0356	0.195634	12.6403	1.23732	0.0617143	0.166745	1.10304	3.98599	2.44687	0.163932	100	8.0067
Sept 17 2021	UA 3753-25	98.6052	0.0532411	0.237787	0.3465	0.0117085	0.0171013	0.0734246	0.442308	0.0947364	0.152445	100	16.6846
	Mean	73.6397	0.348715	13.9875	2.44309	0.135808	0.318113	1.43937	4.48124	3.07497	0.169814	100	7.33108	50
	StDev	5.32553	0.239905	2.48159	1.60512	0.0627427	0.229846	0.612626	0.912679	0.867389	0.0744992	0	2.99693
Sept 17 2021	ID3506_024	73.8006	0.100747	13.1271	1.56118	0.069284	0.068261	0.742019	4.05907	5.09369	0.315924	98.8666	1.1334
Sept 17 2021	ID3506_025	73.6297	0.044936	13.1152	1.50736	0.117769	0.050717	0.722522	4.08602	5.26305	0.291999	98.7633	1.2367
Sept 17 2021	ID3506_026	73.6833	0.029845	13.1586	1.63227	0.052653	0.056085	0.727011	4.04007	5.27712	0.297206	98.8871	1.1129
Sept 17 2021	ID3506_027	73.5205	0.086467	13.1573	1.67684	0.045715	0.050963	0.739171	4.1082	5.24746	0.314717	98.8763	1.1237
Sept 17 2021	ID3506_028	74.0037	0.085755	13.1748	1.57118	0.060965	0.039856	0.732391	4.12622	5.02096	0.306686	99.0533	0.9467
	Mean	73.7276	0.06955	13.1466	1.58977	0.0692772	0.0531764	0.732623	4.08392	5.18046	0.305306	98.8893	1.11068	4
	StDev	0.184389	0.0304318	0.0245964	0.0658442	0.0285135	0.0103003	0.00813541	0.0350841	0.115783	0.0105582	0.104237	0.104237
Sept 17 2021	OldCrow_039	75.2005	0.286155	13.0789	1.66107	0.0422442	0.279303	1.47017	3.89607	3.88305	0.261724	100	4.8531
Sept 17 2021	OldCrow_040	75.2973	0.325184	12.8483	1.7492	0.0673191	0.311109	1.48258	3.75565	3.93779	0.291378	100	5.3047
Sept 17 2021	OldCrow_041	75.1637	0.283943	13.2067	1.7039	0.0485037	0.268112	1.54496	3.859	3.71831	0.261951	100	5.7123
Sept 17 2021	OldCrow_042	75.0497	0.293085	13.1589	1.72952	0.0982023	0.277889	1.4482	3.7577	3.95398	0.300626	100	5.4727
Sept 17 2021	OldCrow_043	75.5566	0.337285	13.0617	1.73032	0.0674504	0.221195	1.4073	3.70563	3.72623	0.240552	100	5.5069
Sept 17 2021	OldCrow_044	75.4296	0.243009	13.1331	1.63279	0.0460956	0.266077	1.46277	3.72868	3.86895	0.243871	100	6.8068
Sept 17 2021	OldCrow_045	74.8412	0.301297	13.3414	1.81379	0.0731911	0.274901	1.53438	3.81895	3.8269	0.224799	100	7.2674
Sept 17 2021	OldCrow_046	75.3807	0.291905	13.05	1.76251	0.0576765	0.288641	1.49725	3.55752	3.91841	0.252476	100	6.3223
Sept 17 2021	OldCrow_047	75.0811	0.335351	13.2827	1.70868	0.0279361	0.275273	1.49472	3.81292	3.7528	0.295104	100	5.7779
Sept 17 2021	OldCrow_048	75.3274	0.316903	12.9687	1.8108	0	0.280409	1.43905	3.77395	3.88355	0.257274	100	5.232
Sept 17 2021	OldCrow_049	75.5455	0.323932	12.9919	1.67913	0.0411582	0.271102	1.44204	3.71682	3.78114	0.267569	100	5.749
Sept 17 2021	OldCrow_050	75.457	0.275492	12.9931	1.73923	0.0798244	0.271368	1.52105	3.69417	3.74325	0.291217	100	6.2993
	Mean	75.2775	0.301129	13.0929	1.72675	0.0541335	0.273782	1.47871	3.75642	3.83286	0.265712	100	5.8587	12
	StDev	0.21707	0.0278477	0.139846	0.054653	0.0258523	0.0204022	0.0417472	0.088313	0.0858283	0.0242261	0	0.695181
Oct22_2021	ID3506-1	74.3282	0.075133	13.0294	1.63016	0.06559	0.034634	0.715964	4.13456	5.21558	0.347054	99.498	0.502
Oct22_2021	ID3506-1	74.0405	0.079314	13.0945	1.59361	0.051345	0.03719	0.721545	3.98649	5.15376	0.320495	99.0065	0.9935
Oct22_2021	ID3506-1	74.5715	0.078901	13.1207	1.57052	0.049914	0.0487	0.740884	4.27537	5.21883	0.31509	99.9193	0.0807
Oct22_2021	ID3506-1	74.5917	0.047422	13.1496	1.47511	0.057054	0.014146	0.751898	4.03827	5.11916	0.356902	99.5207	0.4793
Oct22_2021	ID3506-1	74.9625	0.034086	13.1815	1.5198	0.061333	0.037741	0.723049	4.12962	5.15244	0.321676	100.051	-0.051
Oct22_2021	ID3506-1	75.2226	0.012209	13.256	1.62179	0.087001	0.026807	0.719415	4.13822	5.1517	0.347324	100.505	-0.505
	Mean	74.6195	0.0545108	13.1386	1.5685	0.0620395	0.033203	0.728792	4.11709	5.16858	0.334757	99.7501	0.249917	6
	StDev	0.425336	0.0279006	0.0773745	0.0606131	0.0135826	0.0116857	0.0142695	0.0992272	0.0398534	0.0176684	0.521184	0.521184
Oct22_2021	OldCrow-1	75.5557	0.308229	12.704	1.70201	0.0586695	0.268799	1.43639	3.84345	3.92167	0.259668	100	2.72284
Oct22_2021	OldCrow-1	75.3844	0.363148	12.8087	1.73774	0.0836029	0.271712	1.46411	3.82346	3.8446	0.282222	100	4.45433
Oct22_2021	OldCrow-1	75.5632	0.324815	13.0174	1.65511	0.0748928	0.24211	1.41789	3.78816	3.72053	0.252947	100	4.75315
Oct22_2021	OldCrow-1	75.2233	0.295766	13.0478	1.72948	0.0354398	0.244376	1.46756	4.10328	3.59802	0.329167	100	3.42776
Oct22_2021	OldCrow-1	75.2895	0.295635	12.9493	1.78517	0.0639293	0.257324	1.53367	3.81816	3.81478	0.248748	100	4.08158
Oct22_2021	OldCrow-1	75.2204	0.329132	13.0186	1.72793	0.0544387	0.331311	1.50445	4.04502	3.53961	0.295727	100	0.45683
Oct22_2021	OldCrow-1	75.7416	0.307777	13.0227	1.73615	0.065173	0.281798	1.51251	3.23938	3.87936	0.275639	100	3.71782
Oct22_2021	OldCrow-1	75.3558	0.259529	12.905	1.64042	0.0857525	0.257434	1.44281	3.9273	3.88965	0.305069	100	3.54339
Oct22_2021	OldCrow-1	75.3736	0.300318	13.02	1.79418	0.0308704	0.283099	1.40862	3.85574	3.73704	0.2538	100	2.98464
Oct22_2021	OldCrow-1	75.3171	0.361346	12.8822	1.70601	0.0598157	0.270587	1.43366	3.85451	3.89242	0.287225	100	4.62207
	Mean	75.4025	0.314569	12.9376	1.72142	0.0612585	0.270855	1.46217	3.82985	3.78377	0.279021	100	3.47644	10
	StDev	0.167656	0.0314393	0.112831	0.0489012	0.0181136	0.0254302	0.0423562	0.231562	0.131711	0.0261792	0	1.25865
Oct22_2021	UA3833-39	69.0648	0.602091	15.1612	4.41337	0.16977	0.575498	1.94396	5.32791	2.61764	0.15998	100	4.75635		145.3 ka
Oct22_2021	UA3833-42	69.0831	0.610843	15.231	4.37674	0.178959	0.574773	1.95409	5.42102	2.44283	0.163393	100	4.68539
Oct22_2021	UA3833-17	69.4091	0.639295	15.1637	4.2559	0.176529	0.567495	1.99175	5.36775	2.30034	0.165487	100	2.39981
Oct22_2021	UA3833-9	69.5889	0.575201	15.2422	3.98232	0.176007	0.55774	1.8659	5.48175	2.42236	0.138922	100	4.58039
Oct22_2021	UA3833-6	70.3533	0.646207	14.5365	4.1736	0.192143	0.504945	1.81206	5.02133	2.6439	0.149695	100	1.52517
Oct22_2021	UA3833-7	70.5089	0.439152	14.9562	4.0489	0.150045	0.394837	1.71663	5.12537	2.49676	0.210833	100	5.14912
Oct22_2021	UA3833-35	72.1886	0.315468	14.1003	3.45599	0.147187	0.138706	1.14669	5.52147	2.83327	0.196657	100	5.23657
Oct22_2021	UA3833-38	72.3011	0.478348	14.2634	3.25931	0.0790047	0.392172	1.91388	4.98003	2.18164	0.195186	100	4.54872
Oct22_2021	UA3833-31	73.4341	0.523799	14.3347	2.4835	0.16291	0.431941	2.11152	4.11703	2.21605	0.238099	100	8.11247
Oct22_2021	UA3833-48	74.2424	0.231999	14.8005	1.16134	0.062977	0.275819	1.61833	4.0289	3.56554	0.0157829	100	6.11335
Oct22_2021	UA3833-20	74.6566	0.329903	13.2439	2.01622	0.0767453	0.183751	0.9691	3.95666	4.3503	0.280101	100	5.1017
Oct22_2021	UA3833-41	74.9581	0.306379	13.2016	1.77557	0.0689583	0.271139	1.49517	3.91237	3.80593	0.264646	100	5.30359
Oct22_2021	UA3833-36	74.9889	0.255565	13.0854	1.68472	0.085886	0.279178	1.49967	3.96357	3.93458	0.287399	100	5.3012
Oct22_2021	UA3833-37	75.0975	0.353925	13.0869	1.76369	0.0194913	0.260318	1.43789	3.95783	3.81314	0.270301	100	4.84985
Oct22_2021	UA3833-50	75.1014	0.303869	13.2263	1.7926	0.075265	0.2526	1.40264	3.81467	3.81073	0.283962	100	6.60468
Oct22_2021	UA3833-8	75.1344	0.351447	13.3185	1.7281	0.00745597	0.256347	1.44831	3.71706	3.83376	0.264143	100	4.21101
Oct22_2021	UA3833-33	75.1487	0.288946	13.0824	1.81952	0.07517	0.275613	1.49398	3.74733	3.86638	0.260826	100	5.09112
Oct22_2021	UA3833-28	75.185	0.311209	12.8995	1.89728	0.0622972	0.257127	1.48561	3.91194	3.77346	0.279606	100	3.74682
Oct22_2021	UA3833-15	75.215	0.313429	12.9613	1.78202	0.0565512	0.28855	1.50607	3.76084	3.87136	0.316103	100	3.94727
Oct22_2021	UA3833-4	75.3038	0.326904	12.9973	1.73924	0.144358	0.265653	1.44928	3.80236	3.76267	0.269214	100	4.09796
Oct22_2021	UA3833-13	75.3183	0.338625	13.1216	1.80988	0.0877987	0.300625	1.44417	3.54429	3.84014	0.251367	100	3.97006
Oct22_2021	UA3833-44	75.3281	0.330055	13.0893	1.72991	0.0718938	0.229758	1.4199	3.99239	3.58648	0.287113	100	5.85971
Oct22_2021	UA3833-22	75.3513	0.314369	13.0377	1.79211	0.0314724	0.231601	1.45874	3.77061	3.81253	0.257723	100	4.68144
Oct22_2021	UA3833-47	75.3611	0.267854	13.0777	1.82343	0.00757133	0.296423	1.50109	3.70126	3.76181	0.260599	100	7.05734
Oct22_2021	UA3833-43	75.3646	0.284865	13.0293	1.63951	0.0435655	0.33691	1.49154	3.78918	3.79244	0.294603	100	5.99675
Oct22_2021	UA3833-49	75.4072	0.331428	13.003	1.72914	0.0993786	0.261358	1.50016	3.79879	3.6969	0.222978	100	5.18986
Oct22_2021	UA3833-21	75.4352	0.258552	13.0211	1.73358	0.0740959	0.242181	1.43926	3.78115	3.82777	0.241505	100	3.583
Oct22_2021	UA3833-27	75.4388	0.283475	12.783	1.93017	0.0437003	0.269227	1.48909	3.67338	3.88595	0.262531	100	5.22713
Oct22_2021	UA3833-46	75.4668	0.331649	13.0772	1.70055	0.0331107	0.289423	1.41859	3.7643	3.71788	0.259058	100	6.44105
Oct22_2021	UA3833-23	75.4875	0.305939	13.0291	1.6804	0.0569366	0.270719	1.43204	3.73937	3.78626	0.273456	100	4.63595
Oct22_2021	UA3833-32	75.5455	0.246115	12.9777	1.70847	0.0587026	0.278695	1.40212	3.57826	3.98815	0.27923	100	5.18313
Oct22_2021	UA3833-3	75.5484	0.318329	13.1513	1.73135	0.0407482	0.249514	1.43816	3.65155	3.67329	0.254963	100	5.42166
Oct22_2021	UA3833-10	75.5576	0.313588	12.902	1.79569	0.0583556	0.26438	1.41117	3.80292	3.69246	0.260687	100	4.51473
Oct22_2021	UA3833-51	75.5716	0.317138	13.1334	1.62993	0.0585279	0.295359	1.46943	3.58305	3.70492	0.305719	100	6.30623
Oct22_2021	UA3833-45	75.6114	0.257375	13.2241	1.77616	0.0597087	0.262066	1.40475	3.48726	3.71639	0.259229	100	5.63015
Oct22_2021	UA3833-24	75.6339	0.308199	12.9539	1.63465	0.094361	0.266867	1.3998	3.77957	3.70749	0.285732	100	1.57056
Oct22_2021	UA3833-11	75.6371	0.291408	13.1619	1.68168	0.0365469	0.272776	1.43822	3.59018	3.6759	0.276763	100	6.13707
Oct22_2021	UA3833-29	75.6578	0.260915	12.9354	1.85178	0.0222441	0.249383	1.44218	3.75164	3.62767	0.259658	100	3.70052
Oct22_2021	UA3833-25	75.658	0.290175	12.7631	1.69164	0.07286	0.289423	1.47124	3.87536	3.69267	0.252446	100	3.91164
Oct22_2021	UA3833-14	75.6787	0.376051	12.9664	1.77023	0.0546487	0.270596	1.43606	3.56858	3.66596	0.274761	100	5.83313
Oct22_2021	UA3833-1	75.7234	0.245605	12.963	1.68005	0.0526554	0.261862	1.46461	3.69697	3.67483	0.306099	100	5.16262
Oct22_2021	UA3833-16	75.7285	0.309381	13.1677	1.73815	0.0869151	0.241317	1.47956	3.27706	3.74924	0.286977	100	4.60465
Oct22_2021	UA3833-5	75.7666	0.270287	13.0591	1.74584	0.0466305	0.254175	1.41021	3.45696	3.7663	0.289136	100	5.07496
Oct22_2021	UA3833-19	74.9975	0.303225	13.1175	1.71753	0	0.217063	1.14563	3.92234	4.36604	0.275405	100	4.62813
Oct22_2021	UA3833-18	75.0799	0.246795	13.0486	1.81465	0.0371903	0.238484	1.09101	3.66318	4.5477	0.300207	100	3.94545
Oct22_2021	UA3833-30	76.0926	0.0440579	13.9252	0.542898	0.140794	0.113777	0.998739	3.50282	4.57243	0.0859983	100	7.58069
Oct22_2021	UA3833-2	76.1546	0	14.1578	0.517048	0.160322	0.0645339	0.991864	4.13704	3.75084	0.08528	100	5.51006
Oct22_2021	UA3833-34	76.2771	0.226954	12.8481	1.30545	0.0150039	0.191185	1.02192	3.42798	4.62	0.0856288	100	4.81819
Oct22_2021	UA3833-26	76.6311	0.240705	12.4886	1.30429	0.0391398	0.167686	1.06737	3.36688	4.63127	0.0813709	100	5.02499
Oct22_2021	UA3833-12	77.2081	0.069028	13.3104	0.80547	0.106232	0.0817951	0.880495	3.7899	3.64689	0.131309	100	5.70343
Oct22_2021	UA3833-40	77.2121	0.0838191	13.1872	0.794155	0.16698	0.0770468	0.864565	3.85003	3.67929	0.109577	100	7.03317	51
Oct22_2021	UA3834-9	67.6642	0.643766	15.4984	4.84649	0.177093	0.687283	2.42355	5.65054	2.28329	0.16187	100	5.27559		147.8 ka
Oct22_2021	UA3834-4	69.3704	0.627619	14.9031	4.239	0.17416	0.58156	2.07159	5.46306	2.41868	0.194685	100	5.9799
Oct22_2021	UA3834-1	69.6822	0.487497	14.9926	3.94311	0.210098	0.442081	1.92523	5.66693	2.50388	0.188884	100	4.69006
Oct22_2021	UA3834-14	71.111	0.459267	14.5914	2.80624	0.0807365	0.345785	1.50355	4.47747	4.42483	0.25791	100	6.24063
Oct22_2021	UA3834-10	71.9152	0.422997	14.4038	2.91672	0.101689	0.372429	1.71151	4.52133	3.44287	0.247182	100	6.23862
Oct22_2021	UA3834-16	74.3154	0.25017	13.3061	1.91156	0.0838828	0.182006	1.08515	4.18555	4.4973	0.236294	100	6.25249
Oct22_2021	UA3834-15	74.4965	0.342354	13.3436	1.92135	0.0549364	0.207131	1.04758	4.02667	4.36458	0.252126	100	5.42702
Oct22_2021	UA3834-23	75.1037	0.372825	13.1662	1.69643	0.0461976	0.286624	1.49445	3.95065	3.68935	0.249927	100	5.71594
Oct22_2021	UA3834-22	75.1483	0.333235	13.3502	1.74897	0.0755134	0.246834	1.50983	3.69573	3.68829	0.262388	100	6.9794
Oct22_2021	UA3834-13	75.2147	0.353307	13.1488	1.67342	0.0761218	0.259892	1.65418	3.56278	3.81539	0.311817	100	5.8679
Oct22_2021	UA3834-21	75.295	0.300123	13.2074	1.67547	0.0709653	0.24522	1.49556	3.63761	3.894	0.230454	100	6.94885
Oct22_2021	UA3834-2	75.3101	0.316183	12.936	1.64821	0.0696591	0.286923	1.57128	3.82438	3.79165	0.31739	100	5.18403
Oct22_2021	UA3834-20	75.3493	0.226244	12.986	1.68538	0.071406	0.308204	1.62251	3.75905	3.77793	0.27627	100	5.54712
Oct22_2021	UA3834-11	75.3801	0.292921	13.004	1.72938	0.0654129	0.271875	1.45259	3.81649	3.78389	0.262667	100	5.48804
Oct22_2021	UA3834-8	75.4267	0.28081	13.1285	1.64789	0.0788893	0.277964	1.45389	3.73985	3.72446	0.311395	100	7.38411
Oct22_2021	UA3834-3	75.4591	0.336351	13.0744	1.65171	0.101979	0.260112	1.51103	3.69589	3.68336	0.291983	100	6.28001
Oct22_2021	UA3834-5	75.4651	0.296511	13.0883	1.57177	0.0734488	0.26056	1.45461	3.90818	3.68602	0.252454	100	6.25309
Oct22_2021	UA3834-12	75.4738	0.216678	13.1168	1.83026	0.0777429	0.274399	1.49368	3.72002	3.58076	0.278904	100	6.02868
Oct22_2021	UA3834-6	75.4923	0.288089	13.1596	1.71068	0.0434527	0.254465	1.5441	3.59284	3.70688	0.2681	100	6.21516
Oct22_2021	UA3834-17	75.5127	0.331436	13.1152	1.62645	0.113415	0.248132	1.51533	3.43468	3.90011	0.26146	100	7.05528
Oct22_2021	UA3834-24	75.5314	0.262666	13.0586	1.75296	0.088095	0.305429	1.47689	3.66971	3.6515	0.261802	100	4.32485
Oct22_2021	UA3834-7	75.5792	0.268175	13.1261	1.67762	0.0250575	0.258505	1.53624	3.66974	3.68329	0.22721	100	4.6674
Oct22_2021	UA3834-19	75.6082	0.330825	12.879	1.72028	0.0207496	0.259411	1.53376	3.69196	3.7056	0.323216	100	5.17892
Oct22_2021	UA3834-25	75.6721	0.279882	12.9791	1.7184	0.0419033	0.274825	1.48859	3.59693	3.73387	0.276939	100	6.11721
Oct22_2021	UA3834-18	75.716	0.324608	13.0151	1.62491	0.043593	0.288748	1.56587	3.52385	3.66189	0.304102	100	6.49423	25
Oct22_2021	ID3506-2	73.7858	0.099838	12.9412	1.55825	0.075828	0.02871	0.701629	4.15919	5.04967	0.29425	98.628	1.372
Oct22_2021	ID3506-2	73.8043	0.072093	12.9479	1.55454	0.070213	0.025243	0.703955	4.23246	5.05386	0.321681	98.7137	1.2863
Oct22_2021	ID3506-2	74.458	0.10225	12.6995	1.45419	0.08708	0.0525	0.707705	3.94979	5.05331	0.339719	98.8273	1.1727
Oct22_2021	ID3506-2	74.1631	0.092575	12.8775	1.59114	0.051961	0.024944	0.736146	4.0524	5.06271	0.351244	98.9245	1.0755
Oct22_2021	ID3506-2	74.182	0.1037	12.8616	1.61108	0.098292	0.03537	0.731164	4.06107	5.10792	0.329033	99.047	0.953
Oct22_2021	Mean	74.0786	0.0940912	12.8655	1.55384	0.0766748	0.0333534	0.71612	4.09098	5.06549	0.327185	98.8281	1.1719	5
Oct22_2021	StDev	0.284055	0.0130206	0.100294	0.060452	0.0175272	0.0114969	0.0162492	0.108382	0.0241967	0.0215311	0.166086	0.166086
Oct22_2021	OldCrow-2	75.2669	0.249419	12.9188	1.70869	0.0755934	0.324172	1.49012	3.80772	3.94977	0.269729	100	5.22849
Oct22_2021	OldCrow-2	75.8295	0.292827	12.7728	1.65276	0.0302475	0.279154	1.44075	3.71612	3.76823	0.281061	100	7.08985
Oct22_2021	OldCrow-2	75.5373	0.29605	13.1237	1.70925	0.0389418	0.279934	1.45554	3.65678	3.69128	0.272745	100	6.19589
Oct22_2021	OldCrow-2	75.408	0.230913	12.9951	1.83031	0.0607499	0.288032	1.45134	3.81407	3.72645	0.251982	100	5.19653
Oct22_2021	OldCrow-2	75.1504	0.34192	13.1582	1.71943	0.0700657	0.270975	1.46255	3.82048	3.83344	0.222894	100	3.75179
Oct22_2021	OldCrow-2	75.652	0.260527	12.9641	1.7014	0.00148815	0.304799	1.54949	3.64059	3.71132	0.276642	100	5.58761
Oct22_2021	OldCrow-2	75.5925	0.305144	12.9412	1.75221	0.0344469	0.278784	1.45466	3.76885	3.65386	0.281792	100	6.15131
Oct22_2021	OldCrow-2	75.4325	0.302276	12.9221	1.6511	0.0546445	0.25476	1.4772	3.92955	3.77017	0.265566	100	4.80096
Oct22_2021	Mean	75.4836	0.284885	12.9745	1.71564	0.0457722	0.285076	1.47271	3.76927	3.76307	0.265301	100	5.5003	8
Oct22_2021	StDev	0.21682	0.0356925	0.121988	0.0572133	0.0243766	0.0211972	0.034683	0.0954933	0.0933408	0.0196389	0	1.01097
Oct22_2021	UA3834-35	65.8179	0.903503	15.3914	5.63058	0.180278	1.13146	3.37687	4.96637	2.4825	0.153761	100	3.77654		147.8 ka
Oct22_2021	UA3834-48	70.5137	0.553027	14.4026	3.4259	0.101229	0.504228	1.99125	4.31476	4.04277	0.194357	100	2.9039
Oct22_2021	UA3834-37	70.9698	0.420382	14.6677	3.79162	0.155611	0.409168	1.7406	5.12066	2.56731	0.202887	100	6.22379
Oct22_2021	UA3834-33	71.0362	0.485465	14.8036	3.6652	0.115421	0.489588	1.83065	4.7377	2.71028	0.162521	100	6.39454
Oct22_2021	UA3834-51	71.1912	0.512706	14.5932	3.2926	0.165727	0.364821	1.45748	5.51074	2.77457	0.176827	100	4.21475
Oct22_2021	UA3834-47	74.5671	0.337255	13.1378	1.93202	0.0744533	0.192252	1.05427	4.17129	4.35062	0.236374	100	5.49242
Oct22_2021	UA3834-42	75.1975	0.289661	12.9976	1.69672	0.0711234	0.293576	1.509	3.88204	3.84797	0.277651	100	4.98761
Oct22_2021	UA3834-45	75.2157	0.271553	13.0503	1.73305	0.0385648	0.280247	1.59764	3.74681	3.82148	0.315886	100	5.07933
Oct22_2021	UA3834-34	75.3127	0.2368	13.1128	1.6427	0.0671918	0.24569	1.5398	3.72437	3.91357	0.263987	100	5.73553
Oct22_2021	UA3834-27	75.3615	0.30256	12.9274	1.75066	0.100798	0.271408	1.52423	3.61645	3.92682	0.281752	100	6.52386
Oct22_2021	UA3834-50	75.4007	0.28343	13.2065	1.74199	0.0715568	0.257912	1.4779	3.60844	3.72645	0.290744	100	5.52677
Oct22_2021	UA3834-39	75.4592	0.257922	13.0568	1.74691	0.0580463	0.270445	1.54016	3.56479	3.8289	0.280032	100	5.42031
Oct22_2021	UA3834-41	75.4795	0.313937	12.9554	1.56936	0.0608596	0.316266	1.58631	3.67989	3.80322	0.303826	100	5.14565
Oct22_2021	UA3834-36	75.5972	0.260375	13.0626	1.74163	0.0325956	0.258498	1.5383	3.637	3.62567	0.317889	100	4.98425
Oct22_2021	UA3834-32	75.5987	0.302359	13.1155	1.69843	0.0432212	0.24698	1.5751	3.64193	3.5727	0.264775	100	5.56254
Oct22_2021	UA3834-46	75.5989	0.307748	12.9123	1.67835	0.0689851	0.291724	1.57632	3.53839	3.82902	0.25623	100	6.08985
Oct22_2021	UA3834-30	75.6721	0.308185	13.1158	1.67646	0.0165736	0.24611	1.54822	3.51093	3.6957	0.271015	100	6.59864
Oct22_2021	UA3834-28	75.6934	0.258166	13.075	1.81358	0.040761	0.231667	1.50935	3.39381	3.77039	0.276072	100	6.80802
Oct22_2021	UA3834-40	77.0091	0.352292	13.0281	1.74326	0.0462193	0.275733	1.57514	2.11241	3.6612	0.253798	100	5.53512
Oct22_2021	UA3834-26	77.088	0.227578	12.7203	1.37633	0.0343368	0.371374	1.6762	3.67383	2.66376	0.217325	100	5.71923
Oct22_2021	UA3834-38	77.0913	0.156896	13.096	1.1908	0.0186739	0.315586	1.77416	3.57572	2.58441	0.253627	100	9.4352
Oct22_2021	UA3834-49	77.3675	0.0540227	12.849	0.81946	0.155896	0.0985498	0.933688	4.12311	3.50689	0.118774	100	5.93584
Oct22_2021	UA3834-43	77.5255	0.321302	13.0127	1.81826	0.033568	0.221087	1.56587	1.48475	3.77762	0.309177	100	7.67087
Oct22_2021	UA3834-29	78.5338	0.156292	12.3924	1.04392	0.0545406	0.161375	1.08466	4.00299	2.43788	0.170593	100	6.99035
Oct22_2021	UA3834-44	79.0748	0.210272	12.7573	1.36184	0.0880581	0.31835	1.7654	1.55476	2.72706	0.183424	100	7.10787	25
Oct22_2021	UA3835-44	60.0617	1.3863	15.9316	7.94001	0.218907	2.47377	5.74884	4.51752	1.62893	0.119323	100	3.9325		153.3 ka
Oct22_2021	UA3835-50	63.499	0.993777	15.8496	6.72407	0.199608	1.72304	4.27504	4.49615	2.11613	0.159567	100	3.52961
Oct22_2021	UA3835-41	65.5768	0.918679	15.6657	5.71599	0.182496	1.2271	3.49234	4.62658	2.46562	0.16622	100	2.79086
Oct22_2021	UA3835-14	66.0904	0.735476	15.7441	5.38093	0.146151	1.09058	3.15234	5.14926	2.36175	0.192437	100	3.26455
Oct22_2021	UA3835-12	67.3532	0.610955	15.5865	4.94863	0.215012	0.69713	2.45061	5.69717	2.29196	0.192215	100	2.91467
Oct22_2021	UA3835-7	69.06	0.541789	15.1989	4.25474	0.213479	0.498648	1.9533	5.70624	2.43328	0.180351	100	2.75045
Oct22_2021	UA3835-20	69.1459	0.547723	14.5438	4.94231	0.19892	0.438419	2.26676	5.19001	2.57328	0.197521	100	2.89849
Oct22_2021	UA3835-26	69.1498	0.518022	15.198	4.24192	0.201284	0.525004	2.07326	5.54634	2.42204	0.16047	100	4.00376
Oct22_2021	UA3835-32	69.1597	0.630857	14.9833	4.19076	0.146846	0.476299	2.12866	5.61295	2.49853	0.222334	100	3.68822
Oct22_2021	UA3835-17	69.6185	0.599388	15.3601	4.21054	0.18388	0.517838	1.99289	5.01473	2.4001	0.131814	100	6.25145
Oct22_2021	UA3835-3	69.7965	0.534033	15.1441	4.20803	0.188341	0.54378	1.82654	5.08045	2.55886	0.154175	100	5.37596
Oct22_2021	UA3835-38	70.1933	0.475727	15.017	3.79131	0.0918908	0.369882	1.76944	5.23512	2.89278	0.21112	100	5.47916
Oct22_2021	UA3835-19	70.8377	0.460255	14.755	3.69906	0.23107	0.435807	1.62977	5.09107	2.6845	0.227019	100	5.9565
Oct22_2021	UA3835-30	71.0933	0.417153	15.0605	2.6933	0.150597	0.505519	2.46584	4.41387	3.00356	0.25363	100	5.881
Oct22_2021	UA3835-6	71.7572	0.407978	14.5399	3.87024	0.13314	0.185841	1.49204	4.94948	2.49971	0.212272	100	7.1908
Oct22_2021	UA3835-25	71.8472	0.317054	14.4761	3.83802	0.187521	0.185455	1.39042	4.96363	2.61822	0.227829	100	8.06807
Oct22_2021	UA3835-11	74.8969	0.281509	13.1615	1.92498	0.0777239	0.201437	0.995909	3.97119	4.31627	0.222824	100	5.81276
Oct22_2021	UA3835-35	75.1214	0.286697	13.5157	1.88759	0.0965762	0.407353	2.02043	3.8641	2.57881	0.285957	100	5.38148
Oct22_2021	UA3835-47	75.3323	0.306515	13.2118	1.63588	0.0654788	0.310454	1.43975	3.75133	3.7187	0.293984	100	5.53735
Oct22_2021	UA3835-31	75.349	0.269188	12.775	1.70715	0.0547062	0.19166	1.07249	4.00681	4.37223	0.260581	100	4.9175
Oct22_2021	UA3835-48	75.3751	0.300918	13.2365	1.71802	0.0536794	0.290101	1.45904	3.68787	3.66627	0.274371	100	5.72726
Oct22_2021	UA3835-36	75.3753	0.294288	13.106	1.61257	0.00737161	0.262869	1.43742	3.80696	3.88468	0.274423	100	4.63411
Oct22_2021	UA3835-46	75.4126	0.318065	13.2097	1.72915	0.0434217	0.283029	1.44186	3.61556	3.72203	0.290148	100	6.12293
Oct22_2021	UA3835-5	75.4588	0.265275	13.1643	1.74422	0.029967	0.245434	1.42859	3.62259	3.80846	0.30015	100	5.99662
Oct22_2021	UA3835-37	75.4984	0.272886	13.1263	1.8049	0.0538858	0.27598	1.45298	3.50651	3.84646	0.208728	100	6.08837
Oct22_2021	UA3835-39	75.5053	0.34065	12.9875	1.68507	0.0556328	0.240624	1.43192	3.94008	3.61997	0.249419	100	6.50833
Oct22_2021	UA3835-21	75.5326	0.299028	12.9201	1.81583	0.0619394	0.25292	1.42277	3.51711	3.93801	0.309504	100	6.91388
Oct22_2021	UA3835-16	75.5425	0.34903	12.9966	1.71698	0.0487048	0.281529	1.50087	3.42623	3.90428	0.301186	100	4.64809
Oct22_2021	UA3835-42	75.5558	0.297741	13.0061	1.77519	0.0641104	0.257901	1.45778	3.63304	3.73385	0.282138	100	5.72676
Oct22_2021	UA3835-23	75.6157	0.282874	13.121	1.63059	0.0391213	0.283767	1.38999	3.51576	3.93247	0.243725	100	6.53434
Oct22_2021	UA3835-24	75.6459	0.326323	12.9854	1.74345	0.104894	0.244942	1.42482	3.49974	3.78581	0.30824	100	6.17723
Oct22_2021	UA3835-2	75.6546	0.365877	13.0075	1.83444	0.0584018	0.304109	1.40325	3.52027	3.67331	0.230115	100	5.92063
Oct22_2021	UA3835-15	75.6591	0.338373	12.9728	1.76222	0.0603587	0.262398	1.45478	3.49202	3.7674	0.297815	100	6.71763
Oct22_2021	UA3835-22	75.6766	0.309367	12.926	1.84107	0.0105251	0.262992	1.44105	3.53006	3.78726	0.277575	100	6.48093
Oct22_2021	UA3835-9	75.7103	0.314516	12.9895	1.7167	0.0760241	0.246721	1.40614	3.57417	3.74593	0.284101	100	5.49975
Oct22_2021	UA3835-1	75.7179	0.2772	12.9983	1.73207	0.0422155	0.278615	1.43173	3.61367	3.71043	0.255512	100	6.5556
Oct22_2021	UA3835-34	75.7437	0.269169	12.9709	1.65344	0.0148861	0.272676	1.40831	3.57333	3.88165	0.273747	100	5.52911
Oct22_2021	UA3835-8	75.7471	0.270532	12.8248	1.73491	0.059841	0.236167	1.44917	3.6933	3.75891	0.290727	100	5.83051
Oct22_2021	UA3835-49	75.7606	0.349189	13.0067	1.72521	0	0.275624	1.36281	3.50015	3.82266	0.254508	100	6.67866
Oct22_2021	UA3835-4	75.7657	0.307949	13.1259	1.7821	0.0572919	0.222806	1.44447	3.28164	3.81342	0.256622	100	6.55753
Oct22_2021	UA3835-13	75.866	0.283124	12.7745	1.72103	0.0366936	0.281641	1.36816	3.56569	3.90168	0.260274	100	7.89669
Oct22_2021	UA3835-18	76.1454	0.319001	12.8695	1.4128	0.0431655	0.228834	1.09664	3.34091	4.46571	0.10088	100	5.43843
Oct22_2021	UA3835-40	77.2355	0.0599445	13.2883	0.734387	0.130442	0.0495015	0.844173	3.74589	3.80973	0.131726	100	7.20084
Oct22_2021	UA3835-27	77.2957	0.0814473	13.0545	0.686381	0.113262	0.0826387	0.869871	3.81445	3.91529	0.111693	100	6.75561
Oct22_2021	UA3835-43	77.3818	0.0238527	13.0693	0.827988	0.16489	0.0931528	0.854564	3.92616	3.54957	0.140458	100	6.10268
Oct22_2021	UA3835-10	78.432	0.198512	12.5278	1.13234	0.0613223	0.142549	1.05295	3.74559	2.55699	0.193604	100	7.98454
Oct22_2021	UA3835-29	78.4691	0.211838	12.349	1.02657	0.0270453	0.181742	1.00012	4.21807	2.40558	0.143292	100	6.2757
Oct22_2021	UA3835-45	78.5546	0.148663	12.37	1.14912	0.0469527	0.166062	1.0262	3.97687	2.4373	0.160566	100	7.06187
Oct22_2021	UA3835-28	78.9132	0.158224	12.2847	1.00756	0.0587481	0.166313	1.0438	3.83772	2.41408	0.149372	100	6.50936
Oct22_2021	UA3835-33	79.0043	0.2165	12.078	0.999141	0.0891428	0.193086	1.00777	4.00413	2.28875	0.154124	100	5.20942	50
Oct22_2021	ID3506-3	73.9668	0.073482	12.9182	1.4859	0.078715	0.052328	0.737647	3.87467	5.1982	0.3301	98.6415	1.3585
Oct22_2021	ID3506-3	74.1032	0.098445	12.9769	1.55942	0.097012	0.031016	0.695675	3.76515	5.11138	0.333456	98.6964	1.3036
Oct22_2021	ID3506-3	74.1113	0.107978	12.9802	1.62505	0.056241	0.036844	0.690867	3.7357	5.19633	0.324959	98.7922	1.2078
Oct22_2021	ID3506-3	74.2673	0.082986	12.853	1.50585	0.06892	0.039791	0.754218	3.87252	5.10112	0.336764	98.8066	1.1934
Oct22_2021	ID3506-3	74.1657	0.089019	12.8312	1.65183	0.080156	0.037825	0.730723	3.92231	5.05543	0.337794	98.8258	1.1742
	Mean	74.1229	0.090382	12.9119	1.56561	0.0762088	0.0395608	0.721826	3.83407	5.13249	0.332615	98.7525	1.2475	5
	StDev	0.109056	0.0133866	0.0687591	0.0723365	0.0150539	0.00784955	0.027482	0.0795922	0.062772	0.00523648	0.079599	0.079599
Oct22_2021	OldCrow-3	75.6966	0.309911	13.035	1.62837	0.071562	0.280167	1.46743	3.60782	3.65845	0.316002	100	5.61465
Oct22_2021	OldCrow-3	75.4968	0.348926	12.8762	1.77727	0.0413206	0.273741	1.49321	3.76028	3.71074	0.286019	100	4.65294
Oct22_2021	OldCrow-3	75.5145	0.260057	12.9603	1.71326	0.0655199	0.271308	1.46064	3.84208	3.69144	0.285302	100	5.47914
Oct22_2021	OldCrow-3	75.6556	0.279234	12.9107	1.63617	0.031175	0.280939	1.40212	3.87681	3.71307	0.276618	100	5.16438
Oct22_2021	OldCrow-3	75.3227	0.285766	13.1827	1.79996	0.0393843	0.2963	1.47462	3.77658	3.62986	0.247992	100	7.05952
Oct22_2021	OldCrow-3	75.3846	0.335669	13.1666	1.69598	0.0439797	0.262732	1.45445	3.70474	3.74664	0.26428	100	3.94202
Oct22_2021	OldCrow-3	75.3451	0.294818	13.0313	1.69801	0.0429638	0.315895	1.47192	3.81109	3.80635	0.23577	100	4.93622
	Mean	75.488	0.302054	13.0233	1.707	0.0479865	0.283012	1.46063	3.76849	3.70808	0.273141	100	5.26412	7
	StDev	0.147667	0.0315989	0.118641	0.064576	0.0147511	0.0178161	0.0285546	0.0903491	0.0577847	0.0266786	0	0.968808
Oct22_2021	UA3836-49	64.7639	1.10771	15.5972	6.0051	0.203764	1.27206	3.62556	5.03013	2.25481	0.180486	100	3.31065		156.8 ka
Oct22_2021	UA3836-8	65.3234	0.968145	15.9378	4.84173	0.0809705	1.18988	3.42296	4.95919	3.21198	0.0824861	100	3.07826
Oct22_2021	UA3836-22	67.3639	0.722732	15.5505	4.90464	0.207167	0.777849	2.53256	5.42808	2.37801	0.173879	100	4.58504
Oct22_2021	UA3836-20	68.4549	0.646492	15.154	5.00179	0.133837	0.787949	2.25203	4.88615	2.5355	0.190402	100	7.79999
Oct22_2021	UA3836-43	68.8339	0.465591	14.6666	5.21816	0.208511	0.44485	2.32495	4.95101	2.687	0.25753	100	9.40272
Oct22_2021	UA3836-31	68.8576	0.5689	15.144	4.37971	0.207739	0.637206	2.15311	5.6673	2.25445	0.16781	100	3.46184
Oct22_2021	UA3836-40	68.888	0.678509	15.1559	4.41257	0.168822	0.631026	2.24254	5.45201	2.27354	0.125302	100	2.10384
Oct22_2021	UA3836-7	69.184	0.944455	14.6463	4.66059	0.208248	0.832312	2.20485	4.81305	2.38888	0.151572	100	3.05052
Oct22_2021	UA3836-13	69.3635	0.517029	14.6735	4.76696	0.1765	0.497354	2.26632	4.9033	2.66847	0.215843	100	5.45111
Oct22_2021	UA3836-46	69.3997	0.619717	14.999	4.43507	0.204784	0.578685	2.05502	5.0173	2.56648	0.160357	100	7.6724
Oct22_2021	UA3836-44	69.9869	0.972541	14.2681	3.90344	0.029741	0.894617	2.49154	3.74186	3.66579	0.0586354	100	1.00867
Oct22_2021	UA3836-37	70.2275	0.461707	14.9309	3.87827	0.14194	0.357455	1.80099	4.53616	3.46441	0.259143	100	6.1597
Oct22_2021	UA3836-35	70.2693	0.686172	14.6558	3.92484	0.0823134	0.722491	2.71891	4.87936	1.9434	0.151558	100	2.84573
Oct22_2021	UA3836-38	70.2794	0.426872	15.0862	4.19426	0.189916	0.451032	1.78945	4.88339	2.54334	0.20159	100	7.01628
Oct22_2021	UA3836-6	70.4817	0.429377	14.8058	3.73712	0.199457	0.390735	1.70708	5.42105	2.68243	0.187624	100	5.69406
Oct22_2021	UA3836-23	70.6416	0.445914	14.9417	3.9055	0.162159	0.424007	1.6274	5.13813	2.55087	0.210179	100	5.60692
Oct22_2021	UA3836-50	70.7535	0.382454	14.9273	3.36257	0.16655	0.393292	1.58298	5.51743	2.74449	0.218876	100	6.52443
Oct22_2021	UA3836-3	70.857	0.543912	14.7557	3.73822	0.133781	0.559268	2.4364	4.66166	2.1672	0.189706	100	4.4844
Oct22_2021	UA3836-47	72.2207	0.42453	14.3523	3.26765	0.095072	0.382942	1.81807	4.94904	2.37826	0.143816	100	5.51371
Oct22_2021	UA3836-19	72.6739	0.724255	13.3172	3.44079	0.0777562	0.620544	2.35014	3.52738	3.14342	0.160896	100	7.78872
Oct22_2021	UA3836-28	74.7242	0.283598	13.3947	1.89876	0.0266976	0.152306	0.965949	3.97731	4.39892	0.229399	100	5.04009
Oct22_2021	UA3836-24	74.7772	0.305031	13.4674	1.82171	0.0164617	0.294514	1.14754	3.69921	4.28389	0.241579	100	5.8665
Oct22_2021	UA3836-4	74.8457	0.268324	13.414	1.96938	0.0609543	0.195947	0.957225	3.86702	4.24168	0.232124	100	5.31753
Oct22_2021	UA3836-42	75.0725	0.303208	13.0748	1.92464	0.0733989	0.202648	1.01643	3.54619	4.57536	0.272363	100	6.13888
Oct22_2021	UA3836-18	75.2736	0.301207	13.3652	1.77898	0.105571	0.26534	1.37681	3.51508	3.80046	0.281145	100	6.58141
Oct22_2021	UA3836-34	75.2857	0.257541	13.2011	1.6502	0.0801632	0.300838	1.48212	3.74026	3.79654	0.265609	100	5.17347
Oct22_2021	UA3836-33	75.3074	0.30887	13.2284	1.79643	0.0792855	0.339734	1.43017	3.36019	3.9033	0.317994	100	9.43992
Oct22_2021	UA3836-9	75.3082	0.278762	12.967	1.76128	0.101393	0.313315	1.48933	3.64823	3.90867	0.289016	100	5.54715
Oct22_2021	UA3836-36	75.3378	0.313322	13.2093	1.75715	0.0718698	0.238151	1.45203	3.62051	3.75663	0.314273	100	6.01473
Oct22_2021	UA3836-10	75.3745	0.262589	13.1111	1.8101	0.064471	0.25823	1.44969	3.7138	3.75759	0.255686	100	6.07246
Oct22_2021	UA3836-1	75.3858	0.308154	13.1329	1.69351	0.043358	0.308371	1.4535	3.77076	3.71935	0.237993	100	5.80295
Oct22_2021	UA3836-25	75.4006	0.247189	13.1371	1.73172	0.0612117	0.252634	1.44918	3.5527	3.88773	0.361646	100	5.62265
Oct22_2021	UA3836-15	75.4418	0.356778	13.1425	1.69042	0.0316864	0.377196	1.45793	3.41362	3.85533	0.300527	100	6.63188
Oct22_2021	UA3836-26	75.4706	0.312419	13.247	1.73702	0.0777561	0.283914	1.41074	3.41761	3.8228	0.284259	100	7.57899
Oct22_2021	UA3836-45	75.4722	0.289504	13.1623	1.75506	0.0463552	0.256728	1.44922	3.59198	3.78855	0.242819	100	5.93287
Oct22_2021	UA3836-5	75.4905	0.296379	12.9689	1.71522	0.079003	0.25261	1.42803	3.6626	3.89268	0.276579	100	5.5048
Oct22_2021	UA3836-29	75.4944	0.30025	13.1645	1.67445	0.0103767	0.304578	1.45305	3.75586	3.61895	0.288815	100	4.93149
Oct22_2021	UA3836-17	75.559	0.280908	13.2163	1.5828	0.0434033	0.312757	1.40668	3.43129	3.94565	0.285699	100	5.8343
Oct22_2021	UA3836-14	75.6082	0.352848	12.9881	1.69023	0.0599647	0.279876	1.47781	3.51887	3.81301	0.272589	100	6.02807
Oct22_2021	UA3836-30	75.7028	0.293372	13.0672	1.64843	0.0405977	0.278413	1.42055	3.61344	3.72055	0.27703	100	6.29268
Oct22_2021	UA3836-41	75.7428	0.272958	13.0088	1.72345	0.0552202	0.31116	1.46879	3.35564	3.82996	0.298656	100	5.73555
Oct22_2021	UA3836-2	75.7451	0.290806	12.8939	1.61747	0.0239277	0.281836	1.45127	3.53277	3.94898	0.276313	100	5.81211
Oct22_2021	UA3836-21	75.7625	0.334357	12.9186	1.70888	0.0375299	0.281164	1.48007	3.35681	3.91656	0.262793	100	6.12013
Oct22_2021	UA3836-32	75.8652	0.172016	13.9139	1.09473	0.0402217	0.366445	1.48951	3.96353	3.07702	0.0225371	100	5.36951
Oct22_2021	UA3836-27	75.9754	0.323208	13.0693	1.7258	0.00759203	0.276092	1.45439	3.29225	3.66198	0.276321	100	7.1658
Oct22_2021	UA3836-12	76.7037	0.244092	13.2522	1.36579	0.0466404	0.365329	1.97657	3.34462	2.56805	0.17178	100	6.28089
Oct22_2021	UA3836-16	76.9765	0.0435263	13.1891	0.766459	0.134112	0.0945711	0.883376	4.09431	3.74656	0.0922754	100	6.39003
Oct22_2021	UA3836-39	77.091	0.118493	13.2152	0.781198	0.166898	0.0911862	0.821893	3.87028	3.76023	0.10806	100	6.30707
Oct22_2021	UA3836-11	77.377	0.081494	13.1046	0.766457	0.176045	0.0710066	0.848719	3.96737	3.50059	0.137739	100	7.06927
Oct22_2021	UA3836-48	77.4383	0.036129	13.9532	1.18594	0.0427327	0.0538126	0.622717	2.24768	4.34161	0.100572	100	11.0189	50
Oct22_2021	UA3837-24	64.8337	0.665883	15.8017	5.70985	0.24602	1.0574	3.16666	4.7485	3.62625	0.186057	100	3.34864		168.3 ka
Oct22_2021	UA3837-18	68.247	0.714119	15.3948	4.3939	0.174393	0.606815	2.19566	5.74935	2.42283	0.130595	100	5.22855
Oct22_2021	UA3837-3	68.3634	0.660466	15.4364	4.64405	0.230695	0.610297	2.24255	5.22797	2.42981	0.199537	100	8.37623
Oct22_2021	UA3837-12	68.3908	0.600028	15.4796	4.32941	0.226657	0.595122	2.15547	5.65671	2.44556	0.155921	100	3.02286
Oct22_2021	UA3837-1	68.5452	0.518007	15.07	4.87532	0.158496	0.656617	2.63555	5.0301	2.33996	0.220577	100	3.71935
Oct22_2021	UA3837-22	68.6088	0.585942	15.4331	4.41152	0.236596	0.644428	2.12774	5.44057	2.42012	0.117711	100	4.63822
Oct22_2021	UA3837-17	68.8985	0.544513	15.1416	4.26652	0.207271	0.588994	2.02213	5.76935	2.47016	0.117468	100	2.6963
Oct22_2021	UA3837-25	68.9038	0.93926	15.0578	5.06977	0.0283993	0.776131	0.928245	5.15504	2.9848	0.202302	100	6.26545
Oct22_2021	UA3837-10	69.0455	0.528915	15.162	4.29028	0.160663	0.555559	1.93688	5.71095	2.48347	0.162586	100	2.3768
Oct22_2021	UA3837-4	69.3238	0.513322	15.4599	4.3923	0.232108	0.58495	2.01841	4.84031	2.48679	0.191308	100	7.09282
Oct22_2021	UA3837-9	69.3558	0.768171	14.9549	3.70952	0.153593	0.669426	2.17198	4.41505	3.64758	0.198856	100	6.0308
Oct22_2021	UA3837-13	69.5254	0.569012	15.1314	4.21774	0.214041	0.525216	1.80012	5.40698	2.5138	0.124374	100	3.83854
Oct22_2021	UA3837-15	70.4833	0.473751	15.4861	3.69698	0.168281	0.420308	1.6037	5.23515	2.29246	0.18061	100	8.39892
Oct22_2021	UA3837-8	71.6102	0.374925	14.333	3.70601	0.183828	0.192373	1.26014	5.48202	2.7213	0.176105	100	5.45028
Oct22_2021	UA3837-20	71.6375	0.462097	14.396	3.89729	0.1957	0.209386	1.41317	5.02518	2.63583	0.165067	100	6.12225
Oct22_2021	UA3837-11	71.6754	0.401043	14.4357	3.93226	0.195095	0.216818	1.47235	5.02409	2.50477	0.183992	100	6.62541
Oct22_2021	UA3837-14	72.1259	0.564012	14.0945	3.50004	0.0933626	0.50037	2.26613	4.28448	2.42105	0.194085	100	3.85448
Oct22_2021	UA3837-23	72.8523	0.273135	14.3038	2.52401	0.149731	0.144905	1.01078	4.92568	3.62423	0.247025	100	7.07449
Oct22_2021	UA3837-19	73.9876	0.207052	13.86	2.53939	0.0737338	0.165845	1.34648	4.0678	3.64713	0.135385	100	6.60594
Oct22_2021	UA3837-6	75.5216	0.353803	13.1108	1.91641	0.0948998	0.402127	1.83135	3.92676	2.67815	0.21205	100	5.1789
Oct22_2021	UA3837-16	77.1386	0.0213089	13.1432	0.72228	0.104823	0.0959525	0.745917	4.19136	3.76198	0.0961465	100	4.61744
Oct22_2021	UA3837-21	77.493	0.0976505	13.2526	0.728254	0.111319	0.0961856	0.875939	3.52677	3.73159	0.112015	100	7.57345
Oct22_2021	UA3837-2	77.8898	0.247572	12.7391	1.00725	0.0519556	0.192735	1.26455	3.89367	2.61933	0.121515	100	5.10542
Oct22_2021	UA3837-5	77.9568	0.197547	12.2521	1.19969	0.0431665	0.130475	1.21616	3.75638	3.13412	0.146543	100	5.4197
Oct22_2021	UA3837-7	78.3592	0.220378	12.2387	1.07073	0.0415402	0.168704	1.02324	4.50082	2.24316	0.172264	100	5.07999	25
Oct22_2021	ID3506-4	73.348	0.051697	13.1393	1.57967	0.054908	0.042496	0.736388	3.97728	5.18428	0.330354	98.3698	1.6302
Oct22_2021	ID3506-4	72.9914	0.063928	13.0064	1.56347	0.061955	0.025664	0.661401	3.93188	5.14076	0.336829	97.7077	2.2923
Oct22_2021	ID3506-4	73.4126	0.051933	13.1919	1.52056	0.066181	0.031095	0.72299	4.02473	5.11554	0.319856	98.3852	1.6148
	Mean	73.2507	0.0558527	13.1125	1.55457	0.0610147	0.033085	0.706926	3.97796	5.14686	0.329013	98.1542	1.84577	3
	StDev	0.226843	0.00699444	0.0956028	0.0305442	0.00569502	0.00859064	0.0399912	0.0464288	0.0347736	0.00856559	0.386786	0.386786
Oct22_2021	Old Crow-4	75.2862	0.385361	13.0186	1.67766	0.0220039	0.303082	1.4871	3.93323	3.65826	0.294953	100	3.96689
Oct22_2021	Old Crow-4	75.0205	0.271356	13.223	1.70291	0.014774	0.30834	1.50402	3.8998	3.82534	0.29699	100	4.64981
Oct22_2021	Old Crow-4	75.5278	0.316819	13.0885	1.71068	0.0973102	0.276624	1.44148	3.75951	3.59851	0.236162	100	3.00096
Oct22_2021	Old Crow-4	75.149	0.326734	13.1229	1.74545	0.0681171	0.275578	1.42119	3.8402	3.84455	0.266385	100	4.86822
Oct22_2021	Old Crow-4	75.5479	0.290055	12.927	1.63334	0.0678759	0.294064	1.39181	3.86503	3.76183	0.285613	100	4.50654
	Mean	66.9761	0.182073	11.7926	1.47189	0.0519835	0.159862	1.01133	3.52561	3.93107	0.270472	89.3004	2.87623	5
	StDev	23.4763	0.147014	4.11086	0.512111	0.0286443	0.139408	0.503789	1.22486	1.53942	0.0972829	31.255	1.55351
Oct22_2021	UA3837-38	53.6301	1.58142	15.4702	11.9284	0.195668	3.84069	8.78878	3.65513	0.844686	0.0838067	100	3.41817		168.3 ka
Oct22_2021	UA3837-49	62.3598	1.04385	15.3725	7.26616	0.0878283	2.31433	5.4483	4.12559	1.90084	0.104342	100	1.30398
Oct22_2021	UA3837-26	64.8483	1.08379	15.3627	6.38508	0.183685	1.42727	3.88635	4.53591	2.15204	0.174303	100	6.29618
Oct22_2021	UA3837-43	67.4805	0.765724	15.1181	5.32143	0.154073	0.962744	3.44615	4.78124	1.82733	0.184214	100	1.68865
Oct22_2021	UA3837-50	68.1339	0.608823	15.5182	4.42777	0.165729	0.684697	2.3164	5.66943	2.34425	0.168897	100	2.65026
Oct22_2021	UA3837-42	68.4108	0.704073	15.3456	4.52767	0.190006	0.654604	2.1456	5.52697	2.38696	0.13921	100	4.71522
Oct22_2021	UA3837-46	68.4717	0.577486	15.2482	4.6425	0.15354	0.711974	2.38157	4.99785	2.6292	0.240156	100	8.60315
Oct22_2021	UA3837-48	68.6089	0.718095	15.4324	4.47101	0.198485	0.64837	2.16474	5.377	2.28275	0.126783	100	4.55032
Oct22_2021	UA3837-36	68.6119	0.59426	15.4591	4.48341	0.22589	0.607442	2.189	5.52952	2.17563	0.159905	100	3.09098
Oct22_2021	UA3837-40	68.8947	0.643696	15.3252	4.40368	0.184739	0.61838	2.08114	5.29537	2.41762	0.174917	100	6.56024
Oct22_2021	UA3837-29	69.2802	0.804182	14.9938	3.63502	0.097193	0.930742	2.58872	4.1262	3.46287	0.104827	100	6.07558
Oct22_2021	UA3837-28	69.5752	0.644774	15.2043	4.34063	0.156529	0.629715	2.00037	4.88505	2.42766	0.175284	100	6.75529
Oct22_2021	UA3837-41	69.6752	0.517409	14.894	4.46243	0.198402	0.33174	1.87872	5.49755	2.40799	0.176299	100	6.61666
Oct22_2021	UA3837-47	69.9057	0.468352	15.2086	3.99232	0.146916	0.431601	1.79964	5.2086	2.68243	0.201419	100	3.44286
Oct22_2021	UA3837-31	70.9923	0.483225	14.7173	3.73044	0.104342	0.585889	2.40092	4.71191	2.12819	0.187914	100	4.40888
Oct22_2021	UA3837-30	71.086	0.501743	14.5524	3.68637	0.124945	0.425663	1.52078	5.08812	2.88393	0.167919	100	4.461
Oct22_2021	UA3837-37	71.6493	0.586099	14.3685	3.41481	0.0865943	0.477272	2.08673	4.84078	2.34805	0.183269	100	4.20962
Oct22_2021	UA3837-27	76.3834	0.255423	12.8645	1.27414	0.0595708	0.208021	0.991119	3.21922	4.67483	0.0900349	100	5.32446
Oct22_2021	UA3837-44	76.9454	0.0806728	13.0896	0.835408	0.206726	0.111741	0.862514	3.95286	3.74891	0.214518	100	5.79354
Oct22_2021	UA3837-45	77.1015	0.075799	13.3075	0.716046	0.132388	0.0821427	0.69365	3.82997	3.95506	0.136794	100	6.15839
Oct22_2021	UA3837-33	77.1903	0.0542496	13.0531	0.802734	0.125128	0.0592852	0.846924	4.05402	3.73194	0.106227	100	6.40668
Oct22_2021	UA3837-35	77.2261	0.113553	13.1234	0.818292	0.18525	0.0646002	0.814605	3.73785	3.82336	0.119969	100	5.54207
Oct22_2021	UA3837-39	78.3665	0.153068	12.5767	1.08808	0.0541806	0.169275	1.07591	3.98378	2.38279	0.193202	100	6.21548
Oct22_2021	UA3837-32	78.3803	0.165896	12.3495	1.15438	0.070998	0.150374	1.07066	3.96456	2.5627	0.168581	100	6.6086
Oct22_2021	UA3837-34	78.9254	0.131333	12.1913	1.06817	0.0569251	0.146631	1.02257	3.98807	2.32415	0.187792	100	5.76913
Oct22_2021	OldCrow-5	75.5503	0.306385	13.0013	1.68398	0.105423	0.294761	1.44666	3.6565	3.76146	0.249597	100	6.54317
Oct22_2021	OldCrow-5	75.6253	0.251293	13.0481	1.75091	0.0765999	0.284442	1.4344	3.52677	3.83665	0.213696	100	6.30662
Oct22_2021	OldCrow-5	75.5553	0.314257	13.0232	1.72983	0.0267297	0.263638	1.49748	3.67761	3.71272	0.25736	100	5.24037
Oct22_2021	OldCrow-5	75.5615	0.310377	12.8838	1.77163	0	0.267196	1.46757	3.76785	3.77477	0.252152	100	4.9817
Oct22_2021	OldCrow-5	75.5155	0.337951	12.9179	1.63276	0.0486158	0.295379	1.47426	3.71667	3.84358	0.280887	100	4.47958
Oct22_2021	OldCrow-5	75.2814	0.343823	13.0333	1.77727	0.102794	0.269829	1.40539	3.77572	3.79052	0.284146	100	1.4755
	Mean	75.5149	0.310681	12.9846	1.7244	0.060027	0.279207	1.45429	3.68685	3.78662	0.256306	100	4.83782
	StDev	0.119817	0.0328643	0.0674902	0.0561967	0.042442	0.0141807	0.0325153	0.0916306	0.0489842	0.0255274	0	1.82657
Oct22_2021	ID3506-5	74.0508	0.041599	13.0405	1.64661	0.045067	0.012233	0.729912	4.01924	5.22703	0.307392	99.051	0.949
Oct22_2021	ID3506-5	74.1132	0.102759	12.9609	1.59084	0.091534	0.05359	0.751223	4.1123	5.06918	0.297859	99.0762	0.9238
Oct22_2021	ID3506-5	73.9899	0.078487	13.0747	1.51199	0.097137	0.024172	0.710609	4.18275	5.16252	0.256281	99.0307	0.9693
Oct22_2021	ID3506-5	73.9779	0.094881	12.9315	1.57498	0.049266	0.039288	0.721027	3.9498	5.21165	0.330623	98.8063	1.1937
Oct22_2021	ID3506-5	74.4867	0.113387	12.8982	1.57225	0.045036	0.064708	0.710933	3.88673	5.13864	0.317911	99.1627	0.8373
Oct22_2021	ID3506-5	73.7882	0.073864	13.1326	1.61119	0.054879	0.046011	0.717257	3.98169	5.26246	0.274198	98.8805	1.1195
	Mean	74.0678	0.0841628	13.0064	1.58464	0.0638198	0.0400003	0.723494	4.02209	5.17858	0.297377	99.0012	0.998767
	StDev	0.232445	0.0255527	0.0907101	0.0449633	0.0239765	0.0192528	0.015355	0.108755	0.0697114	0.0277619	0.132372	0.132372
Oct25_2021	ID3506 1	73.7124	0.100549	12.9785	1.47354	0.102486	0.059563	0.734	4.04223	5.15764	0.329387	98.6159	1.3841
Oct25_2021	ID3506 2	73.5756	0.064383	13.1058	1.53695	0.086784	0.008702	0.747835	4.13129	5.08778	0.31426	98.5884	1.4116
Oct25_2021	ID3506 3	73.7753	0.109273	13.1021	1.56422	0.079625	0.040016	0.750554	3.96411	5.09958	0.359076	98.7628	1.2372
Oct25_2021	ID3506 4	74.1132	0.054646	13.2018	1.62188	0.078139	0.034065	0.748039	4.1849	5.17322	0.317016	99.4554	0.5446
Oct25_2021	ID3506 5	74.1268	0.102202	13.0738	1.56044	0.055368	0.006678	0.717759	3.97039	5.07013	0.317946	98.9298	1.0702
Oct25_2021	ID3506 6	73.363	0.114451	13.1375	1.57186	0.067538	0.034412	0.735931	4.1013	5.07302	0.277932	98.4142	1.5858
	Mean	73.7777	0.0909173	13.0999	1.55481	0.0783233	0.0305727	0.73902	4.0657	5.11023	0.31927	98.7944	1.20558
	StDev	0.300507	0.0250222	0.0738325	0.048648	0.0161271	0.0200291	0.0124808	0.0891442	0.0443294	0.0261826	0.367451	0.367451
Oct25_2021	Old Crow 1	75.4195	0.350459	12.9467	1.70798	0.0358236	0.29173	1.4419	3.93382	3.68434	0.242387	100	5.7745
Oct25_2021	Old Crow 2	75.241	0.265497	13.0299	1.71341	0.0979863	0.30081	1.54337	3.7265	3.85329	0.294768	100	5.3439
Oct25_2021	Old Crow 3	75.3902	0.283649	12.8791	1.82709	0.0208906	0.335081	1.47209	3.72857	3.83996	0.288431	100	5.8715
Oct25_2021	Old Crow 4	75.6582	0.34995	12.9614	1.68515	0.0496236	0.310541	1.4679	3.56011	3.74954	0.268022	100	6.6251
Oct25_2021	Old Crow 5	75.4713	0.285277	13.003	1.7103	0.0308817	0.313299	1.50735	3.76865	3.70184	0.268786	100	4.5681
Oct25_2021	Old Crow 6	75.4991	0.236595	12.8938	1.82715	0.0532946	0.328226	1.52625	3.58583	3.82551	0.289532	100	5.2605
Oct25_2021	Old Crow 7	75.2677	0.233341	13.0654	1.77525	0.0698526	0.272492	1.50229	3.69947	3.91704	0.254717	100	5.67
Oct25_2021	Old Crow 8	75.3747	0.309505	13.0917	1.73155	0.0898299	0.269591	1.46516	3.69669	3.75161	0.283807	100	6.3664
Oct25_2021	Old Crow 9	75.6727	0.324979	13.0228	1.68282	0.0267766	0.288409	1.44245	3.65951	3.63329	0.318035	100	5.7347
Oct25_2021	Old Crow 10	75.3114	0.255693	13.2196	1.72444	0.0461157	0.304836	1.52262	3.83963	3.56244	0.275356	100	5.7414
	Mean	75.4306	0.289495	13.0113	1.73851	0.0521075	0.301502	1.48914	3.71988	3.75189	0.278384	100	5.69561
	StDev	0.148458	0.0431444	0.100703	0.0533379	0.0262849	0.021605	0.0360107	0.110906	0.109423	0.021499	0	0.571514
Oct25_2021	UA3838-25	65.9254	0.718976	15.6719	5.20665	0.193975	0.870071	2.7866	4.77711	3.67544	0.224657	100	0.737		206.6 ka
Oct25_2021	UA3838-35	66.575	0.806737	15.1781	5.45533	0.159214	0.85155	3.06009	5.17322	2.63509	0.136452	100	3.5935
Oct25_2021	UA3838-45	67.4455	0.771507	15.2743	4.95759	0.185981	0.749869	2.46988	5.73557	2.31937	0.116798	100	5.234
Oct25_2021	UA3838-11	67.7449	0.711941	15.4911	4.7706	0.201579	0.784022	2.45552	5.47506	2.24925	0.149892	100	6.0126
Oct25_2021	UA3838-50	68.5276	0.562003	15.1344	4.57196	0.157663	0.642537	2.27688	5.75129	2.27994	0.123573	100	4.2501
Oct25_2021	UA3838-22	68.562	0.59271	15.25	4.41468	0.228184	0.7118	2.32705	5.36729	2.43022	0.149759	100	5.6696
Oct25_2021	UA3838-5	68.5663	0.629429	15.24	4.33386	0.228595	0.631196	2.23266	5.63308	2.38303	0.157387	100	2.7332
Oct25_2021	UA3838-30	68.6406	0.613761	15.2732	4.42189	0.159808	0.661424	2.14825	5.58311	2.37531	0.158364	100	3.8887
Oct25_2021	UA3838-49	68.9305	0.625695	15.3568	4.493	0.185234	0.679451	2.2619	4.98057	2.35567	0.169236	100	1.7174
Oct25_2021	UA3838-15	69.1807	0.569743	15.0405	4.53963	0.160989	0.605166	2.13514	5.31291	2.35778	0.125925	100	1.2694
Oct25_2021	UA3838-28	69.8852	0.604658	15.2583	3.94143	0.162759	0.507409	1.93335	5.18473	2.39635	0.162521	100	5.6284
Oct25_2021	UA3838-37	70.233	0.471998	15.0124	3.53868	0.160885	0.399811	1.69676	5.64273	2.67323	0.220265	100	6.9767
Oct25_2021	UA3838-9	70.6569	0.52401	15.0485	3.44022	0.177111	0.42062	1.66715	5.28056	2.63944	0.187853	100	5.6653
Oct25_2021	UA3838-21	70.927	0.45471	14.609	3.37835	0.194337	0.461559	1.58104	5.47693	2.72195	0.251981	100	5.7518
Oct25_2021	UA3838-46	70.9499	0.322209	14.4715	3.89717	0.235491	0.209207	1.50234	5.57888	2.6664	0.215578	100	5.8397
Oct25_2021	UA3838-31	70.9503	0.406986	14.7438	3.91753	0.252823	0.211868	1.49531	5.36858	2.50641	0.189012	100	5.7234
Oct25_2021	UA3838-3	71.063	0.415437	14.5724	3.9856	0.163407	0.173738	1.47422	5.49042	2.50489	0.202551	100	7.5812
Oct25_2021	UA3838-14	71.0752	0.403737	14.6836	3.92327	0.123713	0.198993	1.51081	5.46625	2.46262	0.196192	100	5.5251
Oct25_2021	UA3838-44	71.1655	0.342394	14.2343	4.05128	0.127082	0.225277	1.50231	5.49662	2.70114	0.198961	100	4.4451
Oct25_2021	UA3838-6	71.2334	0.337147	14.6736	3.83204	0.216628	0.204274	1.4873	5.35559	2.55247	0.138833	100	6.9118
Oct25_2021	UA3838-27	71.2881	0.38751	14.2825	3.87903	0.148161	0.216359	1.43684	5.53921	2.65388	0.217474	100	3.9151
Oct25_2021	UA3838-39	71.3201	0.378658	14.194	4.00124	0.199511	0.192801	1.43084	5.4435	2.66788	0.221434	100	3.0651
Oct25_2021	UA3838-19	71.3629	0.309853	14.2663	3.87119	0.188365	0.22956	1.45069	5.65396	2.53078	0.176182	100	5.0659
Oct25_2021	UA3838-48	71.4101	0.515545	14.361	3.85348	0.137899	0.400755	1.74839	4.64088	2.75543	0.227981	100	6.7601
Oct25_2021	UA3838-10	71.8371	0.347715	14.4372	3.98786	0.200222	0.246176	1.47779	4.78937	2.52849	0.191118	100	8.807
Oct25_2021	UA3838-20	72.4943	0.419443	14.0616	3.41548	0.109885	0.235235	1.27096	4.80052	3.03128	0.208311	100	6.3738
Oct25_2021	UA3838-23	72.5067	0.386045	13.9414	2.37778	0.0642454	0.412479	1.80779	3.98958	4.10594	0.526996	100	5.5403
Oct25_2021	UA3838-38	72.6851	0.373943	14.0146	3.29747	0.179695	0.13313	1.15098	5.09927	2.9118	0.198831	100	6.4262
Oct25_2021	UA3838-18	72.7221	0.701792	13.645	2.71479	0.0286849	0.50471	1.75071	3.77124	4.10454	0.0728434	100	6.5571
Oct25_2021	UA3838-43	72.7394	0.415818	13.9843	3.19128	0.0922471	0.265516	1.24239	5.00782	2.89905	0.209398	100	6.5087
Oct25_2021	UA3838-47	72.906	0.262685	13.9826	3.15511	0.171593	0.127476	1.03138	5.21302	2.99964	0.194271	100	5.2221
Oct25_2021	UA3838-41	74.3416	0.327434	13.2154	1.96172	0.0451373	0.227247	1.02066	4.1502	4.53012	0.232986	100	2.7479
Oct25_2021	UA3838-26	74.9148	0.257446	13.3104	1.95191	0.0505074	0.164846	1.00973	3.76836	4.39903	0.223381	100	2.0697
Oct25_2021	UA3838-2	75.0907	0.340183	13.187	1.61434	0.017591	0.213166	1.35698	3.44742	4.56063	0.222216	100	4.2808
Oct25_2021	UA3838-32	75.491	0.25485	13.0934	1.67646	0.0299893	0.208129	1.10999	3.58567	4.38476	0.214012	100	5.5962
Oct25_2021	UA3838-7	75.6846	0.413117	12.2903	2.14333	0.00738176	0.158953	0.632257	3.20145	5.33318	0.174776	100	4.8195
Oct25_2021	UA3838-33	76.0535	0.222814	13.7342	1.39532	0.104037	0.287948	1.32265	4.3817	2.39522	0.132591	100	6.0323
Oct25_2021	UA3838-42	76.1054	0.280874	12.8618	1.17801	0.0416204	0.128147	0.607737	3.76887	4.97979	0.0617371	100	4.6213
Oct25_2021	UA3838-8	76.7425	0.100652	13.372	0.797346	0.166241	0.0782524	0.887943	4.09528	3.66228	0.125798	100	6.8003
Oct25_2021	UA3838-4	76.9774	0.0433272	13.3212	0.785962	0.139233	0.0820337	0.902959	4.02294	3.61963	0.135968	100	6.1191
Oct25_2021	UA3838-1	77.3804	0.10448	12.5473	1.18362	0	0.050781	0.603051	2.01354	6.04543	0.0921534	100	9.2752
Oct25_2021	UA3838-17	77.4702	0.0921135	13.2454	0.769368	0.144972	0.104471	0.829599	3.39214	3.85717	0.122156	100	5.3157
Oct25_2021	UA3838-34	77.4891	0.0762227	13.1158	0.925336	0.132136	0.0828748	0.86636	3.5546	3.66941	0.113694	100	5.578
Oct25_2021	UA3838-24	77.7917	0.566656	11.7973	1.84869	0.0469384	0.145966	0.994573	1.42986	5.28722	0.117631	100	6.6137
Oct25_2021	UA3838-13	78.1802	0.221495	12.4558	0.714503	0.0222605	0.128914	0.652582	3.06153	4.55138	0.0145858	100	4.6742
Oct25_2021	UA3838-29	78.516	0.111553	12.5281	1.075	0.0719663	0.18349	1.04587	3.9649	2.39417	0.140607	100	7.4678
Oct25_2021	UA3838-16	78.5236	0.212457	12.3676	1.05659	0.0286906	0.209504	1.07084	4.10936	2.31038	0.143221	100	6.2933
Oct25_2021	UA3838-12	78.59	0.0513889	12.2793	0.642949	0.109231	0.063388	0.591418	3.38044	4.17091	0.156131	100	6.7931
Oct25_2021	UA3838-36	78.7166	0.192334	12.2398	1.07911	0.0871889	0.175864	1.10235	3.92219	2.366	0.153225	100	7.2818
Oct25_2021	UA3838-40	79.0208	0.00423415	15.4575	0.170124	0.0322827	0.245088	0.24666	1.28162	3.5284	0.0171547	100	11.9776	50
Focus on OCt-type morphologies
Oct25_2021	UA3838OCt-13	68.2421	0.625004	15.3812	4.54551	0.159928	0.631627	2.20162	5.76558	2.33263	0.148294	100	2.9117		206.6 ka
Oct25_2021	UA3838OCt-2	68.4796	0.612634	15.185	4.30571	0.166123	0.616731	2.09324	5.98387	2.42371	0.172139	100	3.991
Oct25_2021	UA3838OCt-1	68.5587	0.510488	14.6093	5.1682	0.199079	0.448915	2.51259	5.26151	2.59293	0.178376	100	1.5644
Oct25_2021	UA3838OCt-24	68.8643	0.533699	15.5461	4.24796	0.17789	0.54184	2.02249	5.44057	2.48159	0.185574	100	4.0723
Oct25_2021	UA3838OCt-12	68.8708	0.611388	15.1507	4.37001	0.193244	0.579834	2.14304	5.58028	2.36151	0.179809	100	2.1118
Oct25_2021	UA3838OCt-21	69.9514	0.542005	15.5797	3.1033	0.123248	0.750495	2.59083	5.14053	2.06904	0.193139	100	5.9585
Oct25_2021	UA3838OCt-17	70.5284	0.399218	14.6267	4.01468	0.18527	0.215115	1.48397	5.81351	2.58171	0.195576	100	5.4742
Oct25_2021	UA3838OCt-4	70.8704	0.425387	14.6122	3.97997	0.167377	0.227105	1.41613	5.63592	2.50969	0.201309	100	5.4917
Oct25_2021	UA3838OCt-11	70.9017	0.40372	14.541	3.91453	0.165771	0.222325	1.52391	5.43939	2.74459	0.184662	100	6.2367
Oct25_2021	UA3838OCt-3	71.0237	0.431001	14.4705	3.93163	0.179475	0.222884	1.42395	5.62016	2.53616	0.207172	100	7.1293
Oct25_2021	UA3838OCt-5	71.1072	0.442312	14.4557	3.94875	0.153845	0.188368	1.46315	5.62633	2.47907	0.174648	100	4.5025
Oct25_2021	UA3838OCt-22	71.9887	0.355316	14.2315	3.04579	0.108355	0.260856	1.25104	5.80103	2.79947	0.203923	100	3.4925
Oct25_2021	UA3838OCt-20	72.3655	0.37882	14.1389	3.39921	0.123665	0.149668	1.08368	5.49219	2.69065	0.229566	100	6.2884
Oct25_2021	UA3838OCt-9	72.535	0.287003	14.0225	3.40068	0.150182	0.131138	1.13472	5.34003	2.84056	0.204218	100	3.0234
Oct25_2021	UA3838OCt-25	72.5372	0.309623	13.9898	3.47671	0.143194	0.121981	1.13764	5.36275	2.75663	0.21232	100	6.3341
Oct25_2021	UA3838OCt-15	72.6114	0.421632	13.8487	3.2729	0.143871	0.122713	1.08943	5.49855	2.82477	0.214467	100	4.64
Oct25_2021	UA3838OCt-16	72.9971	0.328379	13.9629	3.3951	0.15402	0.14239	1.1454	4.98323	2.7332	0.204428	100	7.2527
Oct25_2021	UA3838OCt-10	74.173	0.297862	13.5114	1.98154	0.0558761	0.190688	1.0185	4.1838	4.38596	0.260016	100	6.1906
Oct25_2021	UA3838OCt-8	74.2293	0.284215	13.4262	1.99257	0.0523906	0.15898	1.05207	4.31046	4.3118	0.235145	100	5.3686
Oct25_2021	UA3838OCt-14	74.5705	0.333571	13.3219	1.86997	0.0359856	0.24533	1.07524	4.05438	4.301	0.248017	100	5.476
Oct25_2021	UA3838OCt-23	75.1714	0.285087	13.2043	2.1603	0.0485913	0.0542837	0.84267	3.8714	4.22222	0.180345	100	3.8717
Oct25_2021	UA3838OCt-19	76.8628	0.0822473	13.4153	0.826891	0.171448	0.110777	0.874649	4.02483	3.55228	0.101791	100	8.1332
Oct25_2021	UA3838OCt-6	77.2123	0.0304575	12.313	1.26568	0.0178376	0.0345373	0.724439	3.41181	4.88462	0.13591	100	4.5554
Oct25_2021	UA3838OCt-7	77.2998	0.0657686	13.1885	0.698902	0.157711	0.0991458	0.861788	3.82315	3.72074	0.109091	100	6.3763
Oct25_2021	UA3838OCt-18	77.47	0.115092	12.3906	0.806541	0.0613603	0.124362	0.43125	3.63833	4.82944	0.172001	100	5.1634	25
Oct25_2021	ID3506 7	74.062	0.047232	13.0214	1.6113	0.04387	0.066992	0.757326	3.99336	5.00604	0.304463	98.8453	1.1547
Oct25_2021	ID3506 8	74.0491	0.108535	13.1402	1.57433	0.045286	0.052008	0.766368	4.03754	5.06633	0.348172	99.1093	0.8907
Oct25_2021	ID3506 9	74.5309	0.062912	13.0887	1.67459	0.083485	0.03941	0.746678	3.92162	5.11115	0.363112	99.5406	0.4594
Oct25_2021	ID3506 10	74.268	0.078925	13.1617	1.59169	0.10753	0.049451	0.739059	4.11215	5.02217	0.301195	99.3639	0.6361
	Mean	74.2275	0.074401	13.103	1.61298	0.0700428	0.0519652	0.752358	4.01617	5.05142	0.329236	99.2148	0.785225	4
	StDev	0.225764	0.0261773	0.0624302	0.0437634	0.0310048	0.0113983	0.0119734	0.0798516	0.0472754	0.0311242	0.303335	0.303335
Oct25_2021	Old Crow 11	75.4158	0.29959	12.865	1.64475	0.0902662	0.264786	1.50507	3.91992	3.77479	0.284082	100	4.3706
Oct25_2021	Old Crow 12	75.3405	0.319203	13.0837	1.73901	0.0626729	0.322564	1.47442	3.66308	3.76517	0.296646	100	5.2062
Oct25_2021	Old Crow 13	75.2643	0.338985	13.1749	1.76542	0.028599	0.281602	1.54116	3.78648	3.59515	0.288652	100	1.1048
Oct25_2021	Old Crow 14	75.5501	0.341894	13.1321	1.5994	0.0446179	0.255682	1.39817	3.68455	3.78713	0.266479	100	4.9194
Oct25_2021	Old Crow 15	75.2254	0.309307	13.0902	1.67029	0.0327996	0.308338	1.51348	3.95357	3.68279	0.27613	100	5.2002
Oct25_2021	Old Crow 16	75.1306	0.261895	12.9995	1.69564	0.0713377	0.307966	1.53058	3.85253	3.91265	0.30657	100	4.9409
Oct25_2021	Old Crow 17	75.4418	0.306801	12.9287	1.71432	0.0869408	0.325846	1.45555	3.76839	3.75252	0.282955	100	4.167
Oct25_2021	Old Crow 18	75.3405	0.311938	13.1583	1.66457	0.0336913	0.288461	1.43116	3.85199	3.72892	0.245869	100	3.6338
	Mean	75.3386	0.311202	13.0541	1.68667	0.0563657	0.294406	1.4812	3.81006	3.74989	0.280923	100	4.19286	8
	StDev	0.132525	0.0249784	0.112237	0.0533406	0.0248611	0.0260097	0.0503525	0.104114	0.0907311	0.018667	0	1.36329
Focus on OCt-type morphologies
Oct25_2021	UA3838OCt-49	68.3261	0.566056	15.1693	4.5864	0.210648	0.61748	2.20352	5.91667	2.2881	0.149511	100	1.6337		206.6 ka
Oct25_2021	UA3838OCt-39	68.5599	0.572795	15.1826	4.47373	0.218956	0.66704	2.21076	5.66822	2.32301	0.158988	100	2.4257
Oct25_2021	UA3838OCt-37	68.7204	0.637818	15.0638	4.35485	0.170535	0.675742	2.23177	5.68432	2.36015	0.129989	100	2.8144
Oct25_2021	UA3838OCt-36	68.9661	0.529871	14.969	4.33806	0.200387	0.567999	2.01868	5.77618	2.52243	0.143747	100	4.0481
Oct25_2021	UA3838OCt-46	69.0052	0.587378	15.3549	4.31437	0.199289	0.6166	2.10158	5.30621	2.39256	0.157495	100	5.9356
Oct25_2021	UA3838OCt-30	69.1891	0.520807	15.1202	4.20027	0.192158	0.51241	1.96016	5.67407	2.50715	0.159815	100	5.1313
Oct25_2021	UA3838OCt-27	69.1985	0.532549	15.1413	4.2763	0.157086	0.546543	2.0456	5.2666	2.64733	0.242965	100	4.3767
Oct25_2021	UA3838OCt-28	70.1052	0.727399	14.7147	3.43546	0.172512	0.893784	2.55474	4.57391	2.70942	0.145838	100	4.7307
Oct25_2021	UA3838OCt-48	70.5016	0.494527	14.8175	3.43196	0.172599	0.498907	1.68058	5.62304	2.60427	0.226059	100	2.6738
Oct25_2021	UA3838OCt-44	71.0324	0.452455	14.8099	3.18671	0.170839	0.386927	1.54572	5.73964	2.52732	0.191224	100	3.3721
Oct25_2021	UA3838OCt-34	71.1945	0.410773	14.3681	3.84942	0.152121	0.217594	1.47999	5.66622	2.52194	0.179885	100	3.1405
Oct25_2021	UA3838OCt-42	71.2087	0.371876	14.373	3.96141	0.173476	0.260978	1.40158	5.43132	2.52909	0.372572	100	15.5384
Oct25_2021	UA3838OCt-47	72.0892	0.26296	14.275	3.03086	0.0878635	0.243884	1.14362	4.92906	3.66492	0.352095	100	3.564
Oct25_2021	UA3838OCt-32	72.414	0.2316	14.284	2.83721	0.0564201	0.187435	1.14308	5.10489	3.4672	0.354061	100	7.9122
Oct25_2021	UA3838OCt-33	72.5338	0.258945	14.448	3.02075	0.132334	0.252681	1.32493	4.83923	3.02517	0.211989	100	8.7349
Oct25_2021	UA3838OCt-43	72.5639	0.300752	14.1228	3.28813	0.115482	0.12661	1.05252	5.30722	2.93594	0.240816	100	5.9395
Oct25_2021	UA3838OCt-40	72.9461	0.278054	13.7992	3.23049	0.132918	0.128405	0.978004	5.36273	2.98293	0.208233	100	6.7156
Oct25_2021	UA3838OCt-35	74.4536	0.234573	13.4967	1.7585	0.0369498	0.13724	1.0022	4.05938	4.64367	0.228829	100	4.7113
Oct25_2021	UA3838OCt-41	74.4589	0.305594	13.5357	1.92149	0.0180095	0.215298	1.00536	3.98163	4.35247	0.265384	100	5.8941
Oct25_2021	UA3838OCt-29	76.437	0.295394	13.2291	1.77213	0.036276	0.231016	1.27624	4.64776	1.90805	0.215757	100	6.8144
Oct25_2021	UA3838OCt-38	77.125	0.0484973	13.1669	0.776053	0.196745	0.059933	0.89792	3.96628	3.66496	0.126298	100	5.935
Oct25_2021	UA3838OCt-31	77.161	0.0999943	13.1571	0.749568	0.140494	0.0792707	0.839873	3.73663	3.94226	0.121251	100	6.6957
Oct25_2021	UA3838OCt-26	78.3349	0.19035	12.4824	1.154	0.0486023	0.197511	1.07488	3.99379	2.39774	0.162597	100	7.0002
Oct25_2021	UA3838OCt-45	78.4877	0.200406	12.5243	1.06821	0.0227175	0.187961	1.05669	3.95977	2.36834	0.159886	100	6.4246
Oct25_2021	UA3838OCt-50	78.6469	0.183647	12.201	1.06948	0.0210978	0.162954	1.02467	4.31118	2.26036	0.153415	100	5.8765	25
Focus on Old Crow morphologies
Oct25_2021	UA3837-16	67.793	0.659551	14.6313	5.56976	0.241817	0.633126	2.71962	5.10831	2.51588	0.164885	100	4.4983		168.3 ka
Oct25_2021	UA3837-12	67.9139	0.668223	15.3616	4.63696	0.201874	0.765849	2.28312	5.76967	2.29787	0.130325	100	4.7309
Oct25_2021	UA3837-26	68.0209	0.634471	15.9076	4.67754	0.0922661	1.0643	2.1942	4.67052	2.50333	0.303524	100	18.2517
Oct25_2021	UA3837-34	68.1102	0.755804	15.0823	4.59814	0.234061	0.672076	2.24534	5.8943	2.30071	0.138253	100	4.2907
Oct25_2021	UA3837-43	68.2427	0.644139	15.2869	4.45641	0.211934	0.61287	2.20753	5.876	2.32303	0.178812	100	2.5543
Oct25_2021	UA3837-35	68.307	0.690746	15.237	4.41301	0.210781	0.64694	2.13871	5.88446	2.33663	0.174094	100	6.3035
Oct25_2021	UA3837-1	68.5478	0.665754	15.2706	4.35326	0.194624	0.596979	2.14246	5.60024	2.5017	0.163561	100	2.9291
Oct25_2021	UA3837-21	68.5863	0.647172	15.0717	4.34861	0.232691	0.581403	2.19594	5.85088	2.33965	0.188185	100	5.0217
Oct25_2021	UA3837-10	68.5893	0.574291	15.3102	4.18056	0.204335	0.687843	2.10026	5.9186	2.31148	0.158947	100	3.6644
Oct25_2021	UA3837-47	68.6586	0.698374	15.2242	4.42475	0.165619	0.614778	2.12765	5.54969	2.39249	0.1857	100	3.0988
Oct25_2021	UA3837-28	68.7245	0.637059	15.3519	4.40277	0.227928	0.606878	2.23874	5.49102	2.1916	0.164824	100	2.4744
Oct25_2021	UA3837-39	68.7703	0.618424	15.2649	4.24108	0.199288	0.500514	1.9344	5.90429	2.4466	0.1552	100	4.3497
Oct25_2021	UA3837-19	68.7801	0.416236	14.7039	5.11079	0.234145	0.425769	2.35301	5.2208	2.58625	0.218226	100	2.6451
Oct25_2021	UA3837-18	68.8516	0.648223	15.1333	4.4045	0.194578	0.606229	2.05097	5.65895	2.30016	0.195868	100	4.3008
Oct25_2021	UA3837-9	69.0185	0.628649	15.2829	4.23741	0.181055	0.571229	1.9573	5.62915	2.39443	0.128187	100	2.8726
Oct25_2021	UA3837-20	69.2145	0.679462	15.1522	4.31147	0.192652	0.634148	2.01479	5.19221	2.42046	0.242843	100	10.6534
Oct25_2021	UA3837-11	69.4971	0.572152	15.4445	3.89301	0.206751	0.575236	1.96869	5.23381	2.46609	0.184123	100	4.1103
Oct25_2021	UA3837-45	70.1171	0.506254	15.1538	3.49065	0.147781	0.475604	1.85234	5.23612	2.84463	0.226952	100	5.6593
Oct25_2021	UA3837-36	70.4308	0.61217	14.6728	4.01903	0.109744	0.65557	2.55409	4.78211	2.02239	0.182482	100	2.8718
Oct25_2021	UA3837-37	70.5172	0.511541	14.7825	3.93224	0.117069	0.588891	2.38136	4.86297	2.1576	0.191974	100	6.5418
Oct25_2021	UA3837-15	71.1732	0.498244	14.9119	3.2508	0.103968	0.395314	1.50122	5.43209	2.57305	0.20693	100	5.4293
Oct25_2021	UA3837-8	71.3394	0.438729	14.4102	2.82826	0.0723155	0.346549	1.43939	4.39929	4.53129	0.251154	100	6.3893
Oct25_2021	UA3837-5	71.7667	0.453884	14.1408	3.42923	0.117168	0.526088	2.11813	5.00035	2.31922	0.165996	100	6.0596
Oct25_2021	UA3837-30	72.1233	0.452383	14.2856	3.34184	0.0913033	0.389966	1.95824	5.14419	2.10523	0.139464	100	3.2127
Oct25_2021	UA3837-24	72.2388	0.244842	14.0733	2.83674	0.0545625	0.166713	1.27412	4.20706	4.78247	0.156715	100	7.5574
Oct25_2021	UA3837-25	72.7537	0.255413	14.2944	2.60473	0.179267	0.162316	0.993397	5.1332	3.4493	0.22506	100	6.2145
Oct25_2021	UA3837-46	74.0778	0.227357	13.8086	2.51434	0.0576353	0.163568	1.29883	4.01223	3.73915	0.129717	100	6.9476
Oct25_2021	UA3837-13	74.0797	0.277258	13.3751	2.20298	0.0889696	0.215002	1.00568	4.16734	4.41701	0.22076	100	5.017
Oct25_2021	UA3837-27	74.4067	0.328536	13.2636	1.86699	0.081461	0.16178	1.0043	4.2255	4.49654	0.212666	100	5.3167
Oct25_2021	UA3837-3	74.5598	0.311188	13.2258	1.95257	0.0615651	0.170931	0.979501	4.07862	4.4685	0.247348	100	5.7827
Oct25_2021	UA3837-23	74.7119	0.298074	13.0906	2.03559	0.0295183	0.230124	1.06556	4.05788	4.31236	0.217576	100	4.9063
Oct25_2021	UA3837-44	74.7541	0.273793	13.0991	1.9904	0.0733158	0.176028	0.964231	4.04548	4.4055	0.28161	100	3.7643
Oct25_2021	UA3837-17	74.9129	0.25976	13.2744	1.78677	0.0555489	0.236182	1.13231	3.83782	4.30225	0.261022	100	6.3005
Oct25_2021	UA3837-50	75.0439	0.316502	13.3387	1.81182	0.0373484	0.241271	1.10065	3.61991	4.27912	0.272288	100	5.1017
Oct25_2021	UA3837-14	75.1926	0.309432	13.0582	1.7553	0.0936849	0.264294	1.08545	3.68033	4.39272	0.216933	100	5.2537
Oct25_2021	UA3837-40	75.6241	0.39783	13.0057	1.85933	0.06409	0.37012	1.80666	4.10858	2.60266	0.207836	100	5.5079
Oct25_2021	UA3837-31	75.6568	0.407369	12.8588	1.93115	0.106283	0.377599	1.84031	4.0094	2.65151	0.207549	100	6.0459
Oct25_2021	UA3837-29	76.2303	0.241236	12.6707	1.4546	0.0373964	0.221959	1.22612	3.30229	4.30527	0.40034	100	6.0071
Oct25_2021	UA3837-42	77.0036	0.397562	13.2004	1.90599	0.0755343	0.417972	1.9075	2.22579	2.70949	0.201557	100	6.5841
Oct25_2021	UA3837-2	77.2006	0.052481	13.2786	0.762618	0.116541	0.0923831	0.855411	3.89916	3.65871	0.107818	100	6.3108
Oct25_2021	UA3837-7	77.4646	0.222147	12.5001	1.22782	0.0363003	0.125519	0.819704	3.87661	3.60125	0.162764	100	6.4196
Oct25_2021	UA3837-48	77.6123	0.184107	12.4532	1.1951	0.00897701	0.132226	0.832499	3.78159	3.71225	0.11342	100	5.2691
Oct25_2021	UA3837-38	77.7809	0.249079	12.3893	1.10944	0.0730233	0.172852	1.14457	4.11855	2.82295	0.179807	100	5.4494
Oct25_2021	UA3837-4	78.1957	0.147448	12.4949	1.10164	0.0645536	0.190721	1.07746	4.20786	2.37757	0.183567	100	5.601
Oct25_2021	UA3837-49	78.2159	0.0961986	12.6199	1.00238	0.0657666	0.197535	1.32226	3.74829	2.65266	0.102145	100	5.0308
Oct25_2021	UA3837-6	78.2639	0.228653	12.3026	1.1902	0.0716343	0.2098	1.23318	4.07814	2.30868	0.146193	100	5.0958
Oct25_2021	UA3837-33	78.3571	0.173248	12.1986	1.05926	0.0475829	0.223336	1.04013	4.42825	2.3176	0.199976	100	5.2517
Oct25_2021	UA3837-32	78.5664	0.167065	12.2728	1.06985	0.0527622	0.162948	1.0408	4.15506	2.39617	0.150047	100	6.5448
Oct25_2021	UA3837-41	78.6142	0.117213	12.4559	1.01197	0.0182717	0.205944	1.10141	4.00729	2.34068	0.164321	100	7.2882
Oct25_2021	UA3837-22	78.7717	0.163062	12.1369	1.14339	0.0688178	0.197019	1.05513	4.00952	2.33127	0.159197	100	8.0252	50
Oct25_2021	ID3506 11	74.1379	0.067759	13.2185	1.58605	0.080821	0.036273	0.744724	4.09633	5.05792	0.324592	99.2776	0.7224
Oct25_2021	ID3506 12	74.0976	0.114379	12.9407	1.62103	0.079378	0.023961	0.750318	4.16572	5.15423	0.346867	99.2158	0.7842
Oct25_2021	ID3506 13	74.8601	0.123064	13.1343	1.61883	0.077978	0.050028	0.732588	4.10559	5.02769	0.294628	99.9582	0.0418
Oct25_2021	ID3506 14	74.1227	0.082499	13.1218	1.61627	0.075145	0.042722	0.722699	4.14535	5.01245	0.348175	99.2112	0.7888
	Mean	74.3046	0.0969252	13.1038	1.61055	0.0783305	0.038246	0.737582	4.12825	5.06307	0.328566	99.4157	0.5843	4
	StDev	0.370723	0.0261193	0.116922	0.0164454	0.00242016	0.0110575	0.0123782	0.0328064	0.0636417	0.02508	0.362932	0.362932
Oct25_2021	Old Crow 19	75.1014	0.287046	12.9677	1.69691	0.0776108	0.266618	1.48565	4.19398	3.69746	0.291396	100	3.1514
Oct25_2021	Old Crow 20	74.9278	0.261922	13.0153	1.76153	0.0963542	0.294253	1.49717	4.20665	3.71671	0.287115	100	4.3093
Oct25_2021	Old Crow 21	75.4677	0.271807	12.9205	1.62719	0.0657562	0.233	1.44119	3.97742	3.79932	0.253308	100	5.0569
Oct25_2021	Old Crow 22	75.4446	0.290284	12.9171	1.70565	0.0876657	0.283542	1.4182	4.00192	3.67516	0.227182	100	4.5134
Oct25_2021	Old Crow 23	75.3604	0.287423	12.9705	1.71236	0.0730404	0.234812	1.47752	3.96197	3.72983	0.248161	100	4.8294
Oct25_2021	Old Crow 24	75.5612	0.238671	13.0589	1.73396	0.0612662	0.271352	1.41232	3.81716	3.64556	0.257931	100	5.0569
Oct25_2021	Old Crow 25	75.3311	0.314249	12.8312	1.6797	0.0607606	0.264525	1.48556	4.05203	3.7837	0.254528	100	4.2603
Oct25_2021	Old Crow 26	75.9594	0.318289	13.0356	1.65093	0.0600198	0.286545	1.38771	3.49116	3.5825	0.294272	100	5.4395
	Mean	75.3942	0.283711	12.9646	1.69603	0.0728092	0.266831	1.45066	3.96279	3.70378	0.264236	100	4.57714	8
	StDev	0.307914	0.0262987	0.0741823	0.0433083	0.0135747	0.0227265	0.0412342	0.228744	0.07103	0.024048	0	0.704735
Focus on Old Crow morphologies
Oct25_2021	UA3833-23	65.8356	0.718552	15.5587	5.14074	0.114237	0.712152	2.662	5.18228	3.90714	0.217831	100	2.4084		145.3 ka
Oct25_2021	UA3833-9	70.7444	0.439957	14.7752	3.72324	0.181048	0.417792	1.66808	5.24677	2.63372	0.219389	100	6.2419
Oct25_2021	UA3833-19	70.7481	0.508241	14.6559	3.67048	0.168811	0.371293	1.64613	5.60422	2.46028	0.215044	100	5.2234
Oct25_2021	UA3833-50	70.8941	0.505939	14.8656	3.32352	0.121432	0.408414	1.72745	5.38717	2.59228	0.224893	100	5.6068
Oct25_2021	UA3833-27	71.0875	0.390566	14.3902	3.93106	0.1029	0.415925	2.1316	4.87435	2.51246	0.211176	100	5.1806
Oct25_2021	UA3833-46	71.1935	0.407982	14.4605	2.99596	0.070547	0.299789	1.27353	4.43751	4.69046	0.219911	100	5.7012
Oct25_2021	UA3833-28	72.4038	0.27768	14.0094	3.32109	0.22108	0.107654	1.10971	5.58068	2.81267	0.201868	100	5.9944
Oct25_2021	UA3833-48	72.8408	0.24506	14.0627	2.6918	0.0769447	0.173594	0.9986	5.0853	3.57025	0.329154	100	6.1105
Oct25_2021	UA3833-18	73.0754	0.260238	13.8247	2.45979	0.118729	0.164655	0.902357	5.496	3.50145	0.254078	100	4.4317
Oct25_2021	UA3833-12	74.5982	0.297813	13.4259	2.05529	0.0768463	0.151324	1.04133	3.90708	4.27563	0.220247	100	4.0019
Oct25_2021	UA3833-37	74.7939	0.261427	13.1769	2.06964	0.0401424	0.167886	0.959287	4.14449	4.19987	0.240842	100	4.7914
Oct25_2021	UA3833-16	74.9142	0.317301	13.1311	1.67717	0.0523249	0.206724	1.09655	3.82972	4.57271	0.261081	100	4.9993
Oct25_2021	UA3833-8	74.9779	0.286545	13.4219	1.78988	0.102285	0.297629	1.46147	3.66167	3.78058	0.284196	100	7.0693
Oct25_2021	UA3833-17	75.0445	0.291299	13.0022	1.81107	0.0552748	0.310059	1.4767	3.99747	3.79435	0.280359	100	4.9114
Oct25_2021	UA3833-44	75.1021	0.258081	13.2653	1.78331	0.0467202	0.191636	1.12253	3.76896	4.30512	0.201884	100	5.9165
Oct25_2021	UA3833-38	75.161	0.26958	13.0587	1.77821	0.0493935	0.275086	1.45059	3.97692	3.76377	0.279879	100	5.358
Oct25_2021	UA3833-33	75.1675	0.263726	13.0588	1.73818	0.0511222	0.287149	1.50876	3.8056	3.85405	0.342489	100	5.8022
Oct25_2021	UA3833-40	75.1757	0.362284	13.1881	1.83436	0.034756	0.292377	1.3836	3.89502	3.63881	0.251765	100	6.2176
Oct25_2021	UA3833-25	75.1858	0.3627	13.1195	1.69258	0.0617793	0.28348	1.45742	3.81428	3.77705	0.317014	100	5.8487
Oct25_2021	UA3833-35	75.1908	0.333504	13.2994	1.7617	0.0345438	0.285198	1.47812	3.71348	3.72096	0.235375	100	5.6994
Oct25_2021	UA3833-36	75.2035	0.307524	13.0839	1.83001	0.0641106	0.319011	1.48072	3.87751	3.63597	0.255434	100	7.2119
Oct25_2021	UA3833-21	75.2061	0.266922	12.9922	1.81186	0.0448759	0.283721	1.45018	4.10895	3.63259	0.261613	100	5.0894
Oct25_2021	UA3833-42	75.2295	0.281395	13.2137	1.79451	0.0822858	0.247156	1.4784	3.71051	3.71779	0.316029	100	5.2388
Oct25_2021	UA3833-24	75.2348	0.293932	13.0659	1.79065	0.071821	0.254059	1.08017	3.83443	4.20236	0.221941	100	5.1837
Oct25_2021	UA3833-4	75.288	0.348538	13.1597	1.62071	0.0496294	0.339653	1.52707	3.68801	3.75308	0.291306	100	5.6567
Oct25_2021	UA3833-5	75.2988	0.249519	13.1669	1.66922	0.0466244	0.215768	1.15271	3.63779	4.38561	0.22864	100	5.6696
Oct25_2021	UA3833-15	75.319	0.287224	12.9648	1.79888	0.0654775	0.29083	1.45816	3.84841	3.72903	0.307488	100	4.5641
Oct25_2021	UA3833-20	75.3221	0.344652	13.2248	1.72058	0.065859	0.296992	1.46627	3.73104	3.64518	0.235705	100	5.117
Oct25_2021	UA3833-2	75.3393	0.282845	13.2914	1.67036	0.0758887	0.288893	1.44499	3.61976	3.78171	0.264637	100	4.6617
Oct25_2021	UA3833-34	75.374	0.320082	12.8841	1.80584	0.0778583	0.284866	1.4462	3.74581	3.84705	0.276517	100	5.4153
Oct25_2021	UA3833-29	75.4295	0.323062	12.9604	1.73249	0.0316622	0.245891	1.48758	3.80491	3.77591	0.269331	100	6.0014
Oct25_2021	UA3833-32	75.4312	0.350036	13.0374	1.72335	0.0581365	0.295627	1.49696	3.63243	3.73637	0.308046	100	4.9995
Oct25_2021	UA3833-11	75.4344	0.262812	13.0243	1.73799	0.0686696	0.301285	1.46934	3.70075	3.77568	0.290362	100	4.9245
Oct25_2021	UA3833-13	75.4369	0.292889	13.1192	1.69705	0.0344287	0.273558	1.45554	3.8602	3.60379	0.292387	100	5.1401
Oct25_2021	UA3833-39	75.4382	0.276278	13.0316	1.71616	0.0606142	0.231832	1.43798	3.77767	3.80578	0.289098	100	6.4988
Oct25_2021	UA3833-43	75.4384	0.365361	12.9499	1.76242	0.0104806	0.259556	1.36397	3.94715	3.70787	0.251716	100	5.2921
Oct25_2021	UA3833-45	75.4886	0.215649	13.8082	1.11165	0.0407246	0.157366	0.749807	4.44492	3.96806	0.0194363	100	5.8825
Oct25_2021	UA3833-26	75.5209	0.307518	12.9144	1.85591	0.0752919	0.296509	1.45632	3.81745	3.54189	0.275972	100	5.8318
Oct25_2021	UA3833-14	75.5242	0.221337	12.9762	1.76834	0.0916076	0.277621	1.51108	3.55177	3.87897	0.256841	100	5.4347
Oct25_2021	UA3833-1	75.5507	0.310826	12.8922	1.7628	0.0420874	0.294297	1.4546	3.67702	3.78111	0.302561	100	5.6201
Oct25_2021	UA3833-6	75.5635	0.261695	12.8738	1.78289	0.0570829	0.28939	1.4327	3.8125	3.69752	0.295641	100	5.5531
Oct25_2021	UA3833-49	75.5759	0.326244	12.8927	1.8256	0.0446743	0.277389	1.4277	3.58396	3.82143	0.28976	100	4.7192
Oct25_2021	UA3833-10	75.579	0.290068	12.9634	1.66916	0.0391407	0.28259	1.41339	3.93715	3.61436	0.273548	100	5.7017
Oct25_2021	UA3833-41	75.6156	0.396528	12.8757	1.85548	0.0714694	0.343647	1.71569	4.20743	2.70138	0.280392	100	8.768
Oct25_2021	UA3833-31	75.6381	0.285162	12.9291	1.71752	0.102222	0.262355	1.46923	3.67421	3.69477	0.293414	100	7.1435
Oct25_2021	UA3833-22	75.7193	0.224447	12.9472	1.72641	0.0760081	0.263782	1.40902	3.82865	3.60235	0.261871	100	4.7378
Oct25_2021	UA3833-3	75.7304	0.277302	12.8373	1.74086	0.0864321	0.283096	1.4005	3.74418	3.70865	0.247056	100	4.79
Oct25_2021	UA3833-30	75.8177	0.2391	12.8253	1.74615	0.0744171	0.29575	1.4664	3.66474	3.64961	0.285158	100	4.7893
Oct25_2021	UA3833-47	77.4796	0.167241	12.4368	1.29119	0.0136772	0.14867	0.806832	3.98984	3.55546	0.142999	100	6.5159
Oct25_2021	UA3833-7	78.6272	0.158798	12.2439	1.0783	0.0272855	0.212285	1.10315	4.03693	2.38555	0.163613	100	6.2469	50
Oct25_2021	ID3506 15	74.1483	0	13.2268	1.60718	0.103568	0.074724	0.72378	4.14219	5.11036	0.321799	99.3861	0.6139
Oct25_2021	ID3506 16	74.1006	0.069746	13.0245	1.48952	0.073793	0.047398	0.726004	4.02415	4.98622	0.344469	98.8087	1.1913
Oct25_2021	ID3506 17	74.4119	0.118603	13.3104	1.64176	0.055347	0.04895	0.751402	4.04402	5.07232	0.306869	99.6923	0.3077
Oct25_2021	ID3506 18	74.196	0.065791	13.1237	1.61139	0.107866	0.043558	0.766349	4.0644	5.16861	0.314343	99.391	0.609
Oct25_2021	ID3506 19	74.0163	0.077193	13.1172	1.55341	0.072404	0.05013	0.719857	4.07043	5.12812	0.335933	99.0652	0.9348
Oct25_2021	ID3506 20	73.9689	0.066904	13.0782	1.58144	0.08519	0.012434	0.75073	4.1488	5.12204	0.299473	99.0465	0.9535
	Mean	74.1403	0.0663728	13.1468	1.58078	0.083028	0.046199	0.739687	4.08233	5.09795	0.320481	99.2316	0.768367	6
	StDev	0.157012	0.0381115	0.104152	0.0537223	0.0200394	0.0199258	0.0189923	0.0516084	0.0628934	0.0172059	0.31696	0.31696
Oct25_2021	Old Crow 27	75.4739	0.297416	13.0001	1.7404	0.030114	0.293185	1.40553	3.80319	3.7522	0.263421	100	5.6486
Oct25_2021	Old Crow 28	75.3073	0.315	12.9907	1.58914	0.0879205	0.253601	1.49442	3.99642	3.75575	0.270785	100	4.6502
Oct25_2021	Old Crow 29	75.5419	0.347863	13.0127	1.70478	0.0284439	0.2329	1.46617	3.74238	3.69207	0.298169	100	5.0694
Oct25_2021	Old Crow 30	75.5536	0.265371	12.9999	1.61477	0.0538386	0.26231	1.47789	3.83119	3.73407	0.267294	100	4.9418
Oct25_2021	Old Crow 31	75.344	0.288692	12.9999	1.71827	0.0670112	0.265166	1.43916	3.8463	3.81076	0.285276	100	4.5443
Oct25_2021	Old Crow 32	75.4899	0.299107	12.9817	1.73792	0.0354622	0.255403	1.45019	3.90986	3.62291	0.280937	100	3.782
Oct25_2021	Old Crow 33	75.4551	0.279274	12.8994	1.74798	0.0645949	0.263094	1.42867	3.86583	3.77651	0.283272	100	5.3594
Oct25_2021	Old Crow 34	75.5169	0.228192	13.0332	1.71353	0.0519803	0.293769	1.45127	3.90546	3.61313	0.248672	100	4.2714
Oct25_2021	Old Crow 35	75.3191	0.308572	13.161	1.74632	0.0479907	0.265342	1.39255	3.92274	3.65059	0.239723	100	5.2233
Oct25_2021	Old Crow 36	75.2373	0.321459	13.068	1.59734	0.0728097	0.291967	1.48182	3.8741	3.84181	0.275621	100	4.3287
	Mean	75.4239	0.295095	13.0147	1.69105	0.0540166	0.267674	1.44877	3.86974	3.72498	0.271317	100	4.78191	10
	StDev	0.11206	0.0328796	0.0668375	0.0644188	0.0194178	0.0198362	0.0331039	0.0702877	0.0781587	0.0175108	0	0.570315
Nov29_2021	ID3506_1_6-1	74.4477	0.131662	12.9798	1.4956	0.04606	0.05048	0.715631	3.86422	5.058	0.322471	99.0388	0.9612
Nov29_2021	ID3506_1_6-2	73.8284	0.084308	12.9979	1.60745	0.080592	0.052315	0.724949	3.90595	5.14398	0.344032	98.6922	1.3078
Nov29_2021	ID3506_1_6-3	74.3809	0.068698	13.1468	1.53008	0.03454	0.030078	0.734837	4.0077	5.26867	0.316111	99.4471	0.5529
Nov29_2021	ID3506_1_6-4	73.8915	0.032361	12.9862	1.49149	0.086355	0.033633	0.660096	3.90868	5.1623	0.337942	98.5143	1.4857
Nov29_2021	ID3506_1_6-5	74.0111	0.087807	13.0015	1.59809	0.015829	0.055709	0.745376	3.96383	5.26567	0.299541	98.9768	1.0232
Nov29_2021	ID3506_1_6-6	73.8204	0.025951	13.0217	1.63555	0.07627	0.048152	0.73747	3.92563	5.19315	0.331653	98.7411	1.2589
	Mean	74.0633	0.0717978	13.0223	1.55971	0.0566077	0.0450612	0.719727	3.92934	5.18196	0.325292	98.9017	1.09828	6
	StDev	0.281088	0.0391493	0.0626707	0.0618803	0.0286632	0.0105831	0.0309868	0.0501162	0.0798076	0.0161681	0.329138	0.329138
Nov29_2021	Old Crow_1_10-1	75.5137	0.311447	12.991	1.76819	0.0588171	0.338061	1.44739	3.72629	3.63425	0.272343	100	4.5567
Nov29_2021	Old Crow_1_10-2	75.2495	0.328634	13.1345	1.66324	0.0408979	0.30337	1.54289	3.81881	3.72829	0.245107	100	4.9779
Nov29_2021	Old Crow_1_10-3	75.0567	0.270279	13.0236	1.71945	0.105902	0.317915	1.49718	3.99068	3.81453	0.263281	100	4.9047
Nov29_2021	Old Crow_1_10-4	75.4106	0.332729	13.1061	1.70116	0.0244304	0.321838	1.45027	3.61638	3.8042	0.299816	100	5.7812
Nov29_2021	Old Crow_1_10-5	75.2979	0.240935	12.9977	1.72683	0.0299174	0.297402	1.50697	3.89241	3.77079	0.308794	100	3.8585
Nov29_2021	Old Crow_1_10-6	75.3603	0.368465	13.0758	1.69581	0.0258557	0.316487	1.46188	3.74503	3.72923	0.285559	100	5.4638
Nov29_2021	Old Crow_1_10-7	75.3921	0.324063	12.9578	1.70233	0.0687977	0.295655	1.4892	3.85877	3.68133	0.296972	100	3.8573
Nov29_2021	Old Crow_1_10-8	75.4126	0.353463	12.8569	1.67878	0.0608169	0.331436	1.51537	3.80795	3.75497	0.294191	100	5.421
Nov29_2021	Old Crow_1_10-9	75.4056	0.300043	13.09	1.73974	0.0442238	0.290574	1.45738	3.66162	3.82471	0.240264	100	5.7363
	Mean	75.3443	0.314451	13.0259	1.71061	0.0510732	0.312527	1.48539	3.79088	3.74914	0.278481	100	4.95082	9
	StDev	0.131301	0.0397482	0.0866426	0.0318965	0.0260266	0.0166589	0.0332388	0.116909	0.0633925	0.0246372	0	0.736365
Nov29_2021	UA 3861-12	60.5307	1.19772	14.8031	8.90918	0.143436	2.68946	5.73609	3.40185	2.51321	0.0971852	100	1.735		159.7 ka
Nov29_2021	UA 3861-15	62.4459	1.00441	16.2483	6.78031	0.174838	2.00638	4.82809	4.61132	1.80434	0.124161	100	2.849
Nov29_2021	UA 3861-46	64.8815	1.1044	15.3987	6.03126	0.205662	1.3869	3.42273	5.1145	2.32853	0.162471	100	2.5058
Nov29_2021	UA 3861-6	65.8102	0.952152	15.5329	5.48629	0.197762	1.30002	3.3831	5.02016	2.21245	0.135649	100	1.7207
Nov29_2021	UA 3861-14	66.6149	0.825388	15.2229	4.90829	0.158779	1.21585	3.23975	4.34807	3.33392	0.170674	100	2.6754
Nov29_2021	UA 3861-27	66.9055	0.660988	15.2284	4.73367	0.194969	0.681228	2.25825	5.09429	4.06086	0.234866	100	5.9591
Nov29_2021	UA 3861-3	67.5543	0.4811	17.245	2.77693	0.0971995	0.501	3.89898	5.28684	2.07477	0.108408	100	4.087
Nov29_2021	UA 3861-35	67.7397	0.662796	15.5183	4.23951	0.12327	0.790604	2.31604	5.08296	3.33776	0.244115	100	4.5468
Nov29_2021	UA 3861-24	67.8983	0.706881	15.3085	4.58414	0.203264	0.737816	2.29192	5.72374	2.41397	0.169749	100	3.4644
Nov29_2021	UA 3861-32	68.2473	0.574433	15.2881	4.58455	0.172519	0.786702	2.30352	5.57992	2.35624	0.137917	100	1.8914
Nov29_2021	UA 3861-1	68.2721	0.653964	15.1983	4.6645	0.195824	0.748573	2.26548	5.57086	2.31645	0.147245	100	3.5689
Nov29_2021	UA 3861-21	68.4463	0.637336	15.2553	4.64934	0.162847	0.69168	2.15815	5.46966	2.39799	0.169702	100	7.6998
Nov29_2021	UA 3861-20	68.5065	0.70282	15.0895	4.54784	0.208772	0.685423	2.24205	5.54799	2.36004	0.140802	100	1.9498
Nov29_2021	UA 3861-25	68.7412	0.678481	14.8312	4.95287	0.13767	0.780296	3.02821	4.64365	2.05797	0.191569	100	5.2945
Nov29_2021	UA 3861-44	68.89	0.593341	15.0772	4.15167	0.210862	0.618243	2.0475	5.86653	2.407	0.177826	100	3.9849
Nov29_2021	UA 3861-41	68.9015	0.564646	15.1504	4.43391	0.20406	0.659577	2.06861	5.54172	2.34917	0.163177	100	3.6401
Nov29_2021	UA 3861-30	69.2726	0.577858	15.0558	4.04737	0.134936	0.501947	2.00507	5.45134	2.80004	0.197544	100	5.3306
Nov29_2021	UA 3861-36	69.2733	0.631807	15.0334	4.21953	0.177913	0.620225	2.01088	5.4851	2.41719	0.168737	100	5.5965
Nov29_2021	UA 3861-47	70.2546	0.664817	14.5031	3.50042	0.110029	0.527014	1.98998	4.17309	4.09247	0.238305	100	5.9371
Nov29_2021	UA 3861-16	70.3574	0.596641	14.658	3.31673	0.0988757	0.579442	1.89481	4.25667	4.057	0.238093	100	5.632
Nov29_2021	UA 3861-34	70.421	0.478671	14.9413	3.69424	0.122205	0.38989	1.70706	5.5052	2.5749	0.213804	100	3.6069
Nov29_2021	UA 3861-50	70.5992	0.405122	15.064	3.50384	0.18361	0.371635	1.68721	4.99227	3.03328	0.206266	100	6.0344
Nov29_2021	UA 3861-13	70.7968	0.484985	14.6188	3.82714	0.177283	0.443074	1.68812	5.11602	2.67127	0.227866	100	6.2174
Nov29_2021	UA 3861-8	70.8603	0.477561	14.8879	3.34523	0.151271	0.42358	1.57773	5.38655	2.74501	0.187074	100	6.1789
Nov29_2021	UA 3861-43	70.9961	0.480057	15.0076	3.07867	0.165314	0.421491	1.51282	5.48446	2.70212	0.195428	100	6.0652
Nov29_2021	UA 3861-26	71.4209	0.419647	14.8071	3.31377	0.125897	0.468296	1.51002	5.09257	2.68819	0.198363	100	7.6016
Nov29_2021	UA 3861-48	72.2699	0.370081	14.256	2.92022	0.175506	0.242019	1.24015	4.95378	3.32187	0.323553	100	5.7341
Nov29_2021	UA 3861-19	72.6729	0.639811	14.0905	2.38205	0.031864	0.490071	1.82385	3.83001	3.9858	0.0687087	100	5.3352
Nov29_2021	UA 3861-22	73.0433	0.259675	14.1311	2.6724	0.110122	0.185175	1.0312	4.92357	3.45831	0.239209	100	6.118
Nov29_2021	UA 3861-40	73.1126	0.29176	13.7285	3.08626	0.130334	0.128154	1.14807	4.86257	3.32386	0.242669	100	5.0817
Nov29_2021	UA 3861-10	73.8085	0.233518	15.2629	1.37225	0.0575488	0.574846	2.02194	4.03313	2.63373	0.00218345	100	5.0128
Nov29_2021	UA 3861-2	74.3484	0.338007	13.2242	1.92183	0.0759503	0.211583	1.04808	4.10143	4.5318	0.256559	100	5.4381
Nov29_2021	UA 3861-11	74.5124	0.33764	13.3249	1.95337	0.0410539	0.242931	0.992329	4.06286	4.32247	0.271271	100	5.4828
Nov29_2021	UA 3861-33	74.5172	0.370009	14.4788	2.02392	0.0787396	0.387241	1.75125	4.51137	1.7712	0.142304	100	8.5086
Nov29_2021	UA 3861-7	74.5535	0.28856	13.1984	1.95834	0.0909527	0.234967	0.965832	4.01206	4.53631	0.208002	100	3.6444
Nov29_2021	UA 3861-29	74.6123	0.283029	13.1399	1.91345	0.0666771	0.200493	1.02483	4.28404	4.31573	0.206201	100	4.9868
Nov29_2021	UA 3861-49	75.2592	0.332613	12.9823	1.74673	0.0533144	0.277322	1.08327	3.80988	4.27945	0.227216	100	5.3577
Nov29_2021	UA 3861-4	75.5706	0.213701	13.4619	1.04165	0.0351653	0.0684035	0.814149	2.85348	5.85337	0.113026	100	5.9185
Nov29_2021	UA 3861-39	77.0078	0.156227	11.8757	1.31795	0.0986315	0.164414	1.20628	2.26655	5.70803	0.256242	100	4.932
Nov29_2021	UA 3861-28	77.0365	0.0368008	13.2926	0.756999	0.188135	0.0770646	0.89218	3.86823	3.76972	0.105468	100	7.2492
Nov29_2021	UA 3861-37	77.1367	0.0721512	13.2412	0.750005	0.154649	0.0869484	0.86509	3.76072	3.84791	0.109391	100	6.6918
Nov29_2021	UA 3861-5	77.3338	0.0718782	13.2849	0.831954	0.111118	0.111937	0.847876	3.74615	3.56558	0.122458	100	6.7255
Nov29_2021	UA 3861-9	77.351	0.0603185	13.2978	0.762346	0.118769	0.0942048	0.868386	3.65602	3.70055	0.116812	100	6.6555
Nov29_2021	UA 3861-42	77.7597	0.0800735	12.3374	0.934909	0.058397	0.112799	0.705459	3.66281	4.1389	0.270586	100	6.0825
Nov29_2021	UA 3861-17	78.192	0.23381	12.4139	1.11486	0.0485356	0.164335	1.03247	4.23811	2.41072	0.195189	100	5.0677
Nov29_2021	UA 3861-18	78.2771	0.19374	12.4485	1.07508	0.099037	0.202678	1.02441	4.12251	2.43222	0.161127	100	6.9509
Nov29_2021	UA 3861-38	78.2861	0.154892	12.3212	1.1033	0.0354459	0.247697	1.06699	4.23288	2.4236	0.165051	100	6.3446
Nov29_2021	UA 3861-31	78.319	0.222009	12.5863	1.2508	0.0404622	0.185416	1.03386	3.92423	2.32024	0.152031	100	7.2789
Nov29_2021	UA 3861-45	78.3408	0.252749	12.2407	1.0645	0.0213823	0.150233	1.08683	4.33935	2.38114	0.158074	100	5.4593
Nov29_2021	UA 3861-23	78.582	0.197136	12.3724	1.05531	0.0124256	0.187043	1.03997	4.05037	2.38242	0.156165	100	7.2398	50
Nov29_2021	UA 3862-2-23	59.4099	1.35612	16.3732	8.13872	0.269731	1.86571	5.24027	5.28787	1.9298	0.166134	100	2.3946		162.6 ka
Nov29_2021	UA 3862-13	63.1975	1.17335	14.8553	7.42135	0.184513	1.46428	4.18501	4.16653	3.23774	0.147754	100	1.6903
Nov29_2021	UA 3862-2-11	65.1235	0.816595	15.6715	5.48976	0.180657	1.11652	2.97192	4.8086	3.69049	0.168552	100	1.5245
Nov29_2021	UA 3862-2-10	66.8928	0.792089	14.6926	5.84758	0.117672	0.613928	2.72797	4.55386	3.61568	0.188317	100	2.4761
Nov29_2021	UA 3862-22	67.1663	0.830347	15.3046	5.17533	0.165187	0.830761	2.73495	5.20771	2.44622	0.178975	100	2.0113
Nov29_2021	UA 3862-2-7	67.7219	0.782545	15.4302	5.01114	0.198189	0.787843	2.49639	4.90156	2.54988	0.155632	100	2.2047
Nov29_2021	UA 3862-3	68.3809	0.612982	15.2481	4.5866	0.198405	0.720359	2.2022	5.59356	2.32721	0.167379	100	2.3014
Nov29_2021	UA 3862-6	68.654	0.584126	15.2569	4.48774	0.195507	0.713166	2.31772	5.4202	2.25228	0.152791	100	3.7792
Nov29_2021	UA 3862-21	68.6904	0.714953	15.3076	4.3044	0.204602	0.658744	2.09285	5.59208	2.3411	0.120475	100	4.6983
Nov29_2021	UA 3862-2-18	68.8084	0.600836	15.3009	4.53066	0.170624	0.651463	2.20249	5.29135	2.30052	0.184371	100	3.0931
Nov29_2021	UA 3862-8	68.9068	0.601506	15.3219	4.39421	0.223589	0.676351	2.07732	5.37567	2.30752	0.14854	100	2.3818
Nov29_2021	UA 3862-10	68.9226	0.419729	15.1311	4.2656	0.15295	0.596676	2.10976	5.56181	2.69473	0.187321	100	3.3316
Nov29_2021	UA 3862-2-5	68.9819	0.581704	15.0751	4.42834	0.175819	0.669999	2.12031	5.48545	2.36181	0.154476	100	1.9178
Nov29_2021	UA 3862-11	68.9877	0.62491	14.8488	4.44829	0.176021	0.638275	2.16017	5.47711	2.56265	0.0983414	100	2.1785
Nov29_2021	UA 3862-16	69.0834	0.629375	14.9427	4.32024	0.230281	0.626605	2.12453	5.29758	2.61521	0.168155	100	2.841
Nov29_2021	UA 3862-2-2	69.0922	0.587635	15.2185	4.09599	0.163732	0.620963	2.09357	5.5904	2.40175	0.174613	100	4.3219
Nov29_2021	UA 3862-18	69.1855	0.616188	15.3105	4.33867	0.163102	0.604791	2.21415	4.95461	2.47105	0.182749	100	1.5191
Nov29_2021	UA 3862-19	69.2237	0.536628	15.3501	3.31034	0.142699	0.609582	2.11202	5.28339	3.22416	0.267861	100	5.4395
Nov29_2021	UA 3862-2-21	69.2276	0.472041	15.2787	4.07136	0.197355	0.515675	1.90313	5.83895	2.36873	0.163373	100	4.5204
Nov29_2021	UA 3862-2-13	69.2969	0.549049	15.0551	4.17866	0.181086	0.610425	1.83255	5.72685	2.43002	0.179935	100	4.7169
Nov29_2021	UA 3862-2-9	69.3718	0.525657	15.4299	4.26715	0.238679	0.544644	1.96595	5.30469	2.21708	0.173629	100	6.6436
Nov29_2021	UA 3862-20	69.5743	0.44784	15.1248	4.08065	0.0979187	0.54723	2.04225	5.22705	2.6922	0.214096	100	6.2253
Nov29_2021	UA 3862-2-20	70.169	0.440744	14.6625	3.96788	0.129063	0.439101	1.62284	5.8383	2.60129	0.166886	100	5.2435
Nov29_2021	UA 3862-2-22	70.3824	0.488508	14.6962	3.90153	0.145524	0.432438	1.67458	5.62827	2.51931	0.1695	100	6.0554
Nov29_2021	UA 3862-2-16	70.4107	0.424965	14.304	4.15943	0.146822	0.338148	1.76401	4.31713	3.92462	0.271398	100	7.9255
Nov29_2021	UA 3862-2-8	70.4526	0.426662	15.0376	3.56385	0.114386	0.405292	1.75082	5.09564	2.95272	0.25882	100	5.6491
Nov29_2021	UA 3862-1	70.5303	0.455053	14.907	3.77529	0.163017	0.44669	1.62763	5.33723	2.623	0.174255	100	4.7843
Nov29_2021	UA 3862-2	70.5571	0.461894	14.6401	3.80852	0.148963	0.435981	1.65422	5.48597	2.61123	0.253317	100	5.4425
Nov29_2021	UA 3862-2-25	70.7305	0.421703	14.9708	3.71055	0.191118	0.421836	1.64547	5.26238	2.4998	0.18846	100	6.6076
Nov29_2021	UA 3862-9	70.8369	0.554956	14.5966	3.86516	0.0873241	0.59687	2.49253	4.72734	2.13473	0.138815	100	2.8813
Nov29_2021	UA 3862-2-4	70.8712	0.456249	14.3547	4.00812	0.0974668	0.454387	2.18296	4.83594	2.57295	0.214453	100	5.5617
Nov29_2021	UA 3862-2-24	70.9424	0.52165	14.8797	3.25056	0.152194	0.410195	1.5392	5.46407	2.70824	0.17011	100	6.2996
Nov29_2021	UA 3862-2-17	72.9863	0.302586	15.2188	1.72596	0.0602229	0.496325	1.68541	4.88341	2.5908	0.0648162	100	6.5157
Nov29_2021	UA 3862-2-14	73.1075	0.237844	14.0347	2.68522	0.0659004	0.167177	0.996611	4.85918	3.60651	0.309064	100	5.9626
Nov29_2021	UA 3862-15	74.3972	0.260296	13.4937	1.98054	0.0366123	0.221285	0.994241	3.9563	4.46398	0.252911	100	5.6411
Nov29_2021	UA 3862-2-6	74.5021	0.400065	12.741	2.91527	0.0587297	0.238177	1.08374	3.61001	4.31518	0.175124	100	6.7695
Nov29_2021	UA 3862-2-3	74.53	0.350653	13.2711	1.88287	0.0444213	0.217839	1.05577	4.0381	4.4174	0.247836	100	2.6053
Nov29_2021	UA 3862-12	75.2039	0.228298	13.906	1.1605	0.0427492	0.226268	1.19523	4.16412	3.7824	0.116802	100	5.5726
Nov29_2021	UA 3862-5	75.5614	0.025385	13.1857	1.37396	0.0949565	0.0404286	0.674162	3.20028	5.80641	0.0481666	100	7.3155
Nov29_2021	UA 3862-24	75.5916	0.411258	12.9266	1.94491	0.0772624	0.380216	1.77676	4.03506	2.72494	0.169711	100	4.9253
Nov29_2021	UA 3862-25	76.0795	0.137636	14.0441	0.833061	0.191978	0.162837	1.38025	4.10352	3.00682	0.0778926	100	7.6177
Nov29_2021	UA 3862-4	76.2367	0.365928	12.9205	1.66744	0.0668501	0.327882	1.62707	3.9378	2.68155	0.217353	100	5.0383
Nov29_2021	UA 3862-2-12	76.4835	0.0231255	14.079	0.77512	0.179099	0.087266	0.666134	3.95445	3.69217	0.077805	100	7.1975
Nov29_2021	UA 3862-2-19	76.4872	0.132625	12.3826	1.84043	0.0335732	0.0466256	0.84802	3.88568	4.11945	0.289104	100	5.3589
Nov29_2021	UA 3862-17	76.4927	0.206738	13.6547	1.12548	0.099447	0.318453	1.49161	3.78288	2.71133	0.150606	100	7.2159
Nov29_2021	UA 3862-2-15	76.8503	0.274659	12.7018	1.16663	0.0708338	0.191147	1.24043	3.86086	3.48103	0.209417	100	6.1663
Nov29_2021	UA 3862-23	77.1389	0.295825	12.5376	1.02001	0.068881	0.134472	0.861546	3.16919	4.50912	0.341398	100	3.7354
Nov29_2021	UA 3862-2-1	77.9011	0.147481	12.8894	0.761278	0.0491082	0.261473	1.2403	4.06514	2.62954	0.0711704	100	5.8162
Nov29_2021	UA 3862-14	77.9804	0.134542	12.59	1.0786	0.041273	0.227809	1.27244	3.91578	2.67695	0.10622	100	5.621
Nov29_2021	UA 3862-7	78.9541	0.159351	12.1404	1.09138	0.0507098	0.197213	1.01777	3.94717	2.33159	0.14251	100	5.9945	50
Nov29_2021	ID3506_7_10-1	74.0507	0.054196	13.2632	1.54936	0.059025	0.030893	0.75035	4.13114	5.15213	0.307019	99.2787	0.7213
Nov29_2021	ID3506_7_10-2	73.8622	0.040633	12.9584	1.54822	0.063352	0.020525	0.710507	4.37744	5.2918	0.274839	99.0859	0.9141
Nov29_2021	ID3506_7_10-3	73.8699	0.003113	12.9263	1.56473	0.106534	0.02855	0.72527	4.09534	5.20561	0.287331	98.7479	1.2521
Nov29_2021	ID3506_7_10-4	74.1058	0.016648	13.0997	1.53802	0.00432	0.046155	0.707819	4.09159	5.27582	0.32576	99.1381	0.8619
	Mean	73.9721	0.0286475	13.0619	1.55008	0.0583078	0.0315308	0.723486	4.17388	5.23134	0.298737	99.0627	0.93735
	StDev	0.124601	0.0230389	0.153894	0.0110158	0.0418983	0.0107127	0.019483	0.136874	0.0647306	0.022361	0.225077	0.225077
Nov29_2021	Old Crow_11_18-1	74.6376	0.32293	12.9967	1.82838	0.072889	0.309117	1.48763	4.08128	4.03703	0.292528	100	9.1344
Nov29_2021	Old Crow_11_18-4	75.5351	0.294932	12.9628	1.71017	0.0839607	0.304228	1.52011	3.78733	3.59462	0.266966	100	2.1221
Nov29_2021	Old Crow_11_18-5	75.1246	0.306921	13.0554	1.70508	0.0637456	0.334039	1.50357	3.87337	3.82117	0.27384	100	5.0036
Nov29_2021	Old Crow_11_18-6	75.3482	0.268793	13.0566	1.78638	0.0397012	0.313726	1.55259	3.6053	3.79828	0.297588	100	5.5596
Nov29_2021	Old Crow_11_18-7	75.4068	0.298335	13.0468	1.65438	0.0431183	0.307139	1.47117	3.89842	3.65192	0.286665	100	2.9717
Nov29_2021	Old Crow_11_18-8	75.5727	0.313293	13.1952	1.74998	0.0520132	0.307709	1.51467	3.5627	3.54522	0.240895	100	5.6817
	Mean	75.2708	0.300867	13.0523	1.73906	0.059238	0.31266	1.50829	3.8014	3.74137	0.276414	100	5.07885
	StDev	0.348656	0.0186988	0.0794866	0.0624435	0.0173874	0.0109255	0.0281777	0.194193	0.181676	0.0208353	0	2.45887
Nov29_2021	UA 3863-22	63.1347	0.990368	15.4034	7.18901	0.136168	2.22157	5.19167	3.7526	1.8933	0.112676	100	2.2425		164.6 ka
[truncated: 507 more rows]

## Sheet: Data Set S2
Data Set S2. Output of machine learning predictions for each analysed point, including reference sample analyses (details on classifiers used see Appendix DR1 and Bolton et al., 2020)
SAMPLE	UA	Age	SiO2	TiO2	Al2O3	FeO	MnO	MgO	CaO	Na2O	K2O	Cl	TOTAL	H2O diff	comment	OC_prob	OC_label
OldCrow_000	OldCro	NA	75.2275	0.307554	13.0903	1.72345	0.055904	0.263805	1.45863	3.91023	3.76991	0.248925	100	3.98186	NA	0.999146	1
OldCrow_000	OldCro	NA	74.8893	0.250594	13.3268	1.77455	0.0393232	0.260777	1.49667	3.96769	3.76619	0.294513	100	6.63007	NA	0.904803	1
OldCrow_000	OldCro	NA	75.3676	0.275084	12.8931	1.86993	0.0442196	0.231434	1.50183	3.91974	3.68471	0.274213	100	4.19851	NA	0.996768	1
OldCrow_000	OldCro	NA	75.3269	0.363885	12.9937	1.76782	0.0462471	0.244931	1.47002	3.84592	3.70805	0.300376	100	5.35409	NA	0.999714	1
OldCrow_000	OldCro	NA	75.152	0.310079	13.0618	1.67499	0.0674983	0.262893	1.43084	4.09885	3.70967	0.298771	100	5.85684	NA	0.962384	1
OldCrow_000	OldCro	NA	75.4065	0.323595	13.0597	1.75826	0.0858069	0.295944	1.44297	3.82417	3.60559	0.254931	100	6.22895	NA	0.99973	1
UA3744-8	UA3744	14.71	57.439	1.75114	15.2192	9.84594	0.176519	3.08418	6.41728	3.67989	2.29535	0.118172	100	2.73292	14.71 ka	0	0
UA3744-36	UA3744	14.71	59.8795	1.45477	15.9047	8.25732	0.178727	2.34744	5.43851	4.75967	1.68785	0.118188	100	4.31552	NA	0	0
UA3744-11	UA3744	14.71	61.7935	1.08219	16.2911	6.65583	0.213233	1.74573	4.37909	4.93663	2.72717	0.226747	100	4.02086	NA	0	0
UA3744-34	UA3744	14.71	62.8487	0.38475	20.6363	2.35612	0.065684	0.496669	6.16695	5.43785	1.55028	0.0732706	100	3.27634	NA	1.32928e-05	0
UA3744-49	UA3744	14.71	64.7764	0.997616	16.5591	4.72533	0.177968	1.40053	3.97549	4.64116	2.6376	0.140516	100	4.27905	NA	0	0
UA3744-25	UA3744	14.71	64.892	0.97294	15.975	4.95814	0.144045	1.36724	3.56915	5.08033	2.93494	0.137248	100	5.24641	NA	0	0
UA3744-26	UA3744	14.71	65.3352	0.962973	16.1227	4.647	0.123601	1.22065	3.3333	5.12785	2.98391	0.184262	100	4.38955	NA	0	0
UA3744-42	UA3744	14.71	66.0655	0.820985	15.5079	5.31532	0.194976	1.11774	3.27403	5.23801	2.33783	0.164897	100	3.9676	NA	0	0
UA3744-41	UA3744	14.71	66.3038	0.619122	16.501	4.89532	0.0947307	0.918212	3.29411	4.6479	2.63199	0.121063	100	4.82181	NA	0	0
UA3744-44	UA3744	14.71	66.3122	0.955366	15.6774	5.30486	0.208063	0.96704	2.90506	5.09441	2.47447	0.130633	100	3.93129	NA	0	0
UA3744-16	UA3744	14.71	66.5352	0.792123	15.6313	4.91993	0.180626	0.867123	3.0602	5.32711	2.54098	0.187886	100	3.48775	NA	0	0
UA3744-32	UA3744	14.71	66.9623	0.692275	15.7198	5.08527	0.0933628	1.01591	3.47225	4.39243	2.46513	0.130937	100	3.49048	NA	0	0
UA3744-17	UA3744	14.71	67.3242	0.731314	15.4961	4.70399	0.216718	0.771185	2.66436	5.53614	2.39945	0.202227	100	4.60601	NA	0	0
UA3744-14	UA3744	14.71	67.3244	0.678157	15.7473	4.66378	0.147548	0.793266	2.84951	5.11099	2.54184	0.185039	100	4.68194	NA	0	0
UA3744-39	UA3744	14.71	67.9024	0.676339	15.394	4.35282	0.140075	0.753112	2.61549	5.3772	2.64667	0.183224	100	4.40432	NA	0	0
UA3744-28	UA3744	14.71	68.1428	1.13635	14.5349	4.37161	0.0789537	0.993897	3.02881	4.23567	3.421	0.0724162	100	3.67904	NA	0	0
UA3744-9	UA3744	14.71	68.5852	0.574232	15.3335	4.50839	0.193098	0.582641	2.19944	5.46473	2.43065	0.165347	100	3.15043	NA	0	0
UA3744-35	UA3744	14.71	68.7108	0.504676	15.3377	4.3305	0.120979	0.455622	2.00549	5.05858	3.27108	0.264114	100	7.99397	NA	5.19366e-06	0
UA3744-50	UA3744	14.71	70.2168	0.641902	14.8647	3.07635	0.126825	0.659843	2.38074	4.86702	3.02801	0.178075	100	4.29026	NA	0	0
UA3744-48	UA3744	14.71	70.4469	0.325652	15.4855	2.42001	0.106332	0.377069	1.3997	5.35482	3.90671	0.229018	100	7.02247	NA	0.008	0
UA3744-10	UA3744	14.71	70.7685	0.35668	14.5118	4.14949	0.134466	0.307859	1.98598	4.79312	2.8657	0.163318	100	3.68796	NA	0	0
UA3744-24	UA3744	14.71	72.0477	0.629727	14.0279	3.16702	0.0424441	0.738421	2.57192	4.22647	2.43409	0.147675	100	3.57668	NA	0	0
UA3744-31	UA3744	14.71	73.2702	0.316785	13.7808	2.26161	0.0693469	0.319412	1.47127	4.42829	3.94417	0.178564	100	6.2654	NA	0.00300061	0
UA3744-7	UA3744	14.71	73.2746	0.389873	14.6235	2.01318	0.0969418	0.427904	1.79966	5.34006	1.92254	0.144082	100	3.90933	NA	0	0
UA3744-22	UA3744	14.71	73.4286	0.280608	13.9349	2.17897	0.0608002	0.267643	1.18999	4.41122	4.0219	0.291019	100	7.07757	NA	0.007	0
UA3744-38	UA3744	14.71	73.4695	0.283291	14.0255	2.06791	0.0710884	0.281615	1.37631	4.38945	3.8562	0.231366	100	6.50379	NA	0.00400112	0
UA3744-3	UA3744	14.71	73.5161	0.355043	14.0106	2.04374	0.0137758	0.266719	1.38698	4.19313	4.05221	0.208738	100	7.84541	NA	0.00200188	0
UA3744-33	UA3744	14.71	73.5598	0.302758	14.1656	1.8831	0.0505423	0.295433	1.34789	4.35831	3.88221	0.199447	100	7.65167	NA	0.00800043	0
UA3744-12	UA3744	14.71	73.5768	0.37586	13.9799	1.94063	0.0516011	0.289087	1.34946	4.25075	4.02295	0.210479	100	6.95747	NA	0.0100013	0
UA3744-6	UA3744	14.71	73.7162	0.347172	13.8233	1.9108	0.0945136	0.2688	1.32077	4.32592	4.0064	0.240267	100	4.44756	NA	0.0110024	0
UA3744-19	UA3744	14.71	73.8289	0.334829	14.0954	2.21561	0.122724	0.405228	1.76761	4.88649	2.20631	0.176567	100	4.45753	NA	1.84665e-07	0
UA3744-29	UA3744	14.71	73.9463	0.284856	14.008	1.86523	0.0243984	0.258547	1.32524	4.18704	3.95278	0.190709	100	7.28499	NA	0.00400346	0
UA3744-46	UA3744	14.71	74.4894	0.380559	13.953	1.92825	0.108904	0.29871	1.64483	4.83455	2.22932	0.171109	100	6.44485	NA	0	0
UA3744-15	UA3744	14.71	74.6025	0.244677	14.2188	1.62993	0.0478521	0.300122	1.47117	5.06249	2.28064	0.183242	100	8.44919	NA	0	0
UA3744-37	UA3744	14.71	74.6544	0.367573	13.2838	1.88667	0.036507	0.298446	1.5213	3.85249	3.89284	0.266012	100	6.97668	NA	0.922984	1
UA3744-45	UA3744	14.71	74.6859	0.280731	13.1931	1.96858	0.0443015	0.261439	1.54613	3.99835	3.82046	0.259565	100	4.17485	NA	0.865103	0
UA3744-47	UA3744	14.71	74.7157	0.303429	13.1844	1.72111	0.0796617	0.281654	1.55898	4.03365	3.88971	0.299255	100	4.0756	NA	0.919297	1
UA3744-23	UA3744	14.71	74.8046	0.335504	13.1908	1.6145	0.062806	0.248037	1.08604	3.85012	4.5139	0.379262	100	7.71742	NA	0.0150353	0
UA3744-30	UA3744	14.71	74.8528	0.24274	13.9753	1.83153	0.0727695	0.287355	1.40571	5.0261	2.17895	0.163664	100	8.6513	NA	0.001	0
UA3744-18	UA3744	14.71	74.8531	0.325173	14.0844	1.74374	0.06722	0.276316	1.43233	4.84075	2.25736	0.154553	100	7.46797	NA	0.001	0
UA3744-43	UA3744	14.71	74.9273	0.311227	13.3395	1.74329	0.0396454	0.318554	1.46768	3.90385	3.77864	0.220029	100	7.15444	NA	0.863123	0
UA3744-1	UA3744	14.71	74.951	0.199578	14.4131	1.26368	0.119755	0.357753	1.3345	4.49496	2.83475	0.0399198	100	6.81571	NA	0	0
UA3744-27	UA3744	14.71	75.104	0.25754	13.3191	1.79037	0.0503781	0.2159	1.47665	3.8292	3.75631	0.259074	100	7.38438	NA	0.938152	1
UA3744-21	UA3744	14.71	75.2737	0.277272	13.093	1.80631	0.0517358	0.269054	1.48073	3.74591	3.78347	0.28254	100	7.0933	NA	0.999628	1
UA3744-40	UA3744	14.71	75.3987	0.244182	14.0803	1.50332	0.0533979	0.308464	1.77759	4.45472	2.05879	0.155754	100	9.7999	NA	0	0
UA3744-4	UA3744	14.71	75.8792	0.185273	13.7967	1.57069	0.0835371	0.294766	1.76814	4.29322	2.00395	0.160897	100	8.67408	NA	0	0
UA3744-20	UA3744	14.71	76.8927	0.228046	12.9371	1.154	0.0717072	0.263792	1.27761	3.92659	3.10811	0.181065	100	7.2352	NA	0.00100029	0
UA3744-2	UA3744	14.71	77.5975	0.181835	12.7484	1.08866	0.0726674	0.14155	0.989858	4.12966	2.93597	0.14716	100	8.58903	NA	0	0
UA3744-13	UA3744	14.71	77.6591	0.147882	12.7925	1.06998	0.0198534	0.20494	1.09343	4.39505	2.48631	0.169127	100	7.34072	NA	0	0
UA3744-5	UA3744	14.71	78.091	0.111404	12.7074	1.05385	0.0680209	0.130849	1.1	4.05072	2.53144	0.200552	100	8.53838	NA	0	0
UA3749-12	UA3749	134.21	63.6129	0.992988	16.2034	6.09752	0.200849	1.56953	4.08892	5.21467	1.91915	0.129262	100	6.33683	137.2 ka	0	0
UA3749-19	UA3749	134.21	64.0159	1.06134	16.0044	5.91268	0.188694	1.45416	3.96984	5.23231	2.03146	0.166859	100	4.02172	NA	0	0
UA3749-24	UA3749	134.21	66.0405	0.651713	15.585	4.94806	0.184697	0.772241	2.53721	5.05776	4.07259	0.193952	100	4.13896	NA	1.84406e-06	0
UA3749-1	UA3749	134.21	67.5151	0.491545	14.7949	5.6312	0.25152	0.429039	2.54672	5.57859	2.59493	0.21479	100	6.04206	NA	0	0
UA3749-3	UA3749	134.21	68.1609	0.583031	15.5342	4.32084	0.166382	0.520283	2.08659	6.08124	2.42596	0.156009	100	6.04125	NA	0	0
UA3749-10	UA3749	134.21	68.8486	0.623861	14.9204	4.40431	0.21775	0.54434	1.83081	5.9159	2.53933	0.199677	100	4.33304	NA	0	0
UA3749-20	UA3749	134.21	68.8803	0.606424	15.1172	4.09171	0.160371	0.488232	1.87935	5.71755	2.88096	0.229835	100	6.08821	NA	2.92601e-06	0
UA3749-5	UA3749	134.21	68.8906	0.629787	15.6979	3.57567	0.0799675	0.715484	2.25835	4.63314	3.34856	0.220277	100	10.1035	NA	4.65475e-07	0
UA3749-17	UA3749	134.21	69.1893	0.632827	14.4926	3.86683	0.0667507	0.610357	2.2193	4.8302	3.95446	0.177301	100	2.98824	NA	1.61864e-06	0
UA3749-13	UA3749	134.21	70.0692	0.442565	15.0687	3.40554	0.164096	0.406636	1.61164	6.00084	2.6493	0.234336	100	6.40547	NA	0	0
UA3749-11	UA3749	134.21	70.1215	0.303783	14.7815	4.07382	0.17767	0.293069	1.47471	5.90571	2.69011	0.230049	100	9.63129	NA	0.00100015	0
UA3749-25	UA3749	134.21	71.4259	0.564729	13.8145	3.70494	0.0539306	0.407681	1.90755	4.35429	3.65888	0.138989	100	3.34421	NA	1.52524e-05	0
UA3749-7	UA3749	134.21	71.6479	0.312642	14.5012	3.50662	0.157279	0.170157	1.26147	5.52912	2.75452	0.205514	100	6.77097	NA	0	0
UA3749-16	UA3749	134.21	71.7341	0.185951	14.5511	3.13728	0.0784882	0.227585	1.22774	5.1315	3.50838	0.281476	100	6.6306	NA	0.003	0
UA3749-18	UA3749	134.21	73.3013	0.558769	15.4928	3.54011	0.219603	0.375127	1.65581	1.87928	2.79963	0.229218	100	8.18511	NA	0.001	0
UA3749-21	UA3749	134.21	73.854	0.407754	14.7756	4.09031	0.192921	0.230305	1.53157	2.07237	2.6589	0.240569	100	11.6073	NA	0.016	0
UA3749-23	UA3749	134.21	74.2996	0.338543	14.0592	1.64456	0.113653	0.390595	1.63673	4.70035	2.71396	0.132673	100	6.75884	NA	0	0
UA3749-14	UA3749	134.21	74.8231	0.260298	13.0989	1.84065	0.0438846	0.235951	1.14501	3.91742	4.43807	0.254108	100	6.64617	NA	0.0114393	0
UA3749-6	UA3749	134.21	75.073	0.270235	13.1973	1.69991	0.0708804	0.230527	1.11072	3.767	4.38522	0.25201	100	6.15595	NA	0.0177141	0
UA3749-4	UA3749	134.21	75.3774	0.282079	13.589	1.55546	0.0336285	0.263432	1.49731	4.63078	2.6439	0.164016	100	7.43269	NA	0	0
UA3749-2	UA3749	134.21	76.8802	0.164167	12.6965	1.27915	0.0465912	0.122435	0.803101	4.24454	3.65133	0.144621	100	5.7869	NA	6.60888e-07	0
UA3749-15	UA3749	134.21	77.4033	0.0552777	13.2605	0.52675	0.155198	0.0628395	0.660822	3.40481	4.43377	0.0474216	100	7.87961	NA	0	0
UA3749-8	UA3749	134.21	77.6677	0.119851	12.8072	1.09471	0.0230123	0.235565	1.01272	4.44545	2.4599	0.172892	100	7.72324	NA	0	0
UA3749-9	UA3749	134.21	77.7514	0.208788	12.6862	1.15991	0.0470675	0.203048	1.07112	4.35063	2.38668	0.174471	100	6.75305	NA	0	0
UA3749-22	UA3749	134.21	80.2008	0.176785	12.5433	1.20599	0.0679324	0.157243	1.10798	1.94775	2.45732	0.174347	100	8.29112	NA	0	0
OldCrow	OldCro	NA	75.3161	0.294241	13.1525	1.66294	0.101508	0.281567	1.45311	3.82025	3.69598	0.286401	100	5.50595	NA	0.999633	1
OldCrow	OldCro	NA	75.2377	0.22639	13.0195	1.74494	0.0119607	0.314875	1.496	4.03626	3.70984	0.261584	100	5.70809	NA	0.992875	1
OldCrow	OldCro	NA	75.542	0.374426	12.9776	1.73508	0.0212727	0.231406	1.45652	3.5982	3.86462	0.256865	100	7.26144	NA	0.995749	1
OldCrow	OldCro	NA	75.4196	0.280959	12.9439	1.72087	0.00749331	0.280864	1.53439	3.84442	3.74149	0.291972	100	5.99613	NA	0.999769	1
UA3749-25	UA3749	134.21	66.6236	0.775432	15.9897	4.85181	0.167279	0.791591	2.84439	5.41739	2.38486	0.198798	100	5.97769	NA	0	0
UA3749-8	UA3749	134.21	67.8513	0.587012	15.2254	4.56868	0.194116	0.629467	2.31566	6.11031	2.40165	0.15022	100	3.98394	NA	0	0
UA3749-15	UA3749	134.21	67.8894	0.628039	15.6311	4.41648	0.179406	0.618275	2.1278	6.01563	2.36582	0.165303	100	3.57161	NA	0	0
UA3749-21	UA3749	134.21	67.962	0.557629	15.6665	4.3905	0.145848	0.532813	2.58201	5.5732	2.45435	0.174507	100	4.4331	NA	0	0
UA3749-28	UA3749	134.21	68.398	0.757966	15.1193	4.51774	0.153399	0.926577	3.10501	5.1913	1.7358	0.122583	100	3.09412	NA	0	0
UA3749-5	UA3749	134.21	68.5048	0.749125	15.2347	4.45778	0.175558	0.861161	3.08139	4.97629	1.84201	0.151416	100	3.35834	NA	0	0
UA3749-23	UA3749	134.21	69.8463	0.528817	14.7065	3.81593	0.150777	0.339076	1.56636	6.25508	2.65251	0.178867	100	1.92659	NA	0	0
UA3749-13	UA3749	134.21	70.0003	0.438488	14.9233	3.78916	0.183785	0.425713	1.7991	5.52196	2.76838	0.193418	100	2.04963	NA	2.34092e-07	0
UA3749-7	UA3749	134.21	70.438	0.464935	14.9651	3.31063	0.18182	0.312009	1.51175	5.52296	3.12516	0.216635	100	6.58378	NA	0	0
UA3749-19	UA3749	134.21	72.6963	0.196092	14.1882	2.75906	0.110554	0.161866	0.987117	5.07799	3.5834	0.309125	100	6.78373	NA	0.01	0
UA3749-3	UA3749	134.21	72.917	0.230709	14.0757	2.75288	0.105423	0.152605	0.958422	5.08224	3.459	0.343627	100	6.65629	NA	0.009	0
UA3749-18	UA3749	134.21	73.1255	0.0609805	14.1695	2.17368	0.0775207	0.00454687	1.3422	3.24391	5.69471	0.138793	100	8.88236	NA	0.001	0
UA3749-16	UA3749	134.21	73.2508	0.233234	15.6613	1.66969	0.0612677	0.52141	2.16935	4.4454	1.98404	0.00452166	100	7.68879	NA	8.24216e-07	0
UA3749-26	UA3749	134.21	74.1494	0.353174	13.9811	1.85472	0.0754712	0.370221	1.69107	4.69266	2.67953	0.197179	100	6.5802	NA	4.49547e-07	0
UA3749-17	UA3749	134.21	74.1839	0.352611	13.544	2.03266	0.0586821	0.209659	1.04804	4.05614	4.30161	0.274573	100	6.09396	NA	0.00902826	0
UA3749-12	UA3749	134.21	74.2167	0.17841	15.1275	1.0935	0.0255921	0.34858	1.70897	4.66738	2.55515	0.101041	100	6.2563	NA	0	0
UA3749-2	UA3749	134.21	74.3294	0.290456	13.8865	1.78864	0.108734	0.419697	1.67225	4.64435	2.72745	0.171285	100	6.74757	NA	0.00100021	0
UA3749-14	UA3749	134.21	74.5523	0.331558	13.285	1.80401	0.03872	0.281109	1.54267	4.14472	3.82392	0.253114	100	5.21188	NA	0.577863	0
UA3749-22	UA3749	134.21	75.1345	0.294474	13.2765	1.7565	0.0559306	0.255181	1.48917	3.81639	3.70751	0.276178	100	6.48944	NA	0.998266	1
UA3749-29	UA3749	134.21	75.1681	0.2157	14.1515	0.657725	0.0164703	0.0319604	0.590702	4.30504	4.81073	0.0673045	100	5.9335	NA	0	0
UA3749-11	UA3749	134.21	75.2223	0.184991	13.8037	1.48599	0.0652708	0.338784	1.71986	3.98805	3.06159	0.167238	100	4.96206	NA	2.46882e-06	0
UA3749-1	UA3749	134.21	75.2732	0.354473	12.9704	1.74291	0.0695521	0.264888	1.45946	3.7976	3.86262	0.264517	100	6.84828	NA	0.999099	1
UA3749-4	UA3749	134.21	75.488	0.129598	14.2495	0.922073	0.183772	0.174368	1.40812	4.28721	3.08399	0.0947908	100	7.96263	NA	0	0
UA3749-20	UA3749	134.21	76.2279	0.209388	12.5302	1.80318	0.0626078	0.116263	0.932099	3.6018	4.33799	0.230588	100	2.85711	NA	0.0187317	0
UA3749-10	UA3749	134.21	76.635	0.142934	13.4338	1.20376	0.0418417	0.34439	2.04272	3.56839	2.41045	0.228162	100	5.62753	NA	8.35389e-07	0
UA3749-9	UA3749	134.21	76.7134	0.117661	13.1592	1.1377	0.0625346	0.127447	0.991435	3.96856	3.50106	0.285361	100	5.34515	NA	0.0105913	0
UA3749-24	UA3749	134.21	77.0509	0.12318	13.4845	1.06409	0.145082	0.278262	1.42811	3.79191	2.53859	0.123061	100	7.39418	NA	0	0
UA3749-30	UA3749	134.21	78.9486	0.190428	12.35	0.591608	0	0.0323308	0.407503	3.4034	4.05199	0.0312617	100	6.74207	NA	0	0
UA3751-31	UA3751	167.67	54.8363	1.99362	15.8038	10.7542	0.283288	3.36384	7.60043	4.1678	1.1279	0.0887311	100	4.31091	168.89 ka	0	0
UA3751-44	UA3751	167.67	60.0799	1.51538	15.6399	8.15388	0.152063	2.24663	5.32216	5.12722	1.68289	0.103323	100	2.46366	NA	0	0
UA3751-1	UA3751	167.67	64.1591	1.18237	15.76	6.50327	0.228009	1.37838	3.67119	5.05015	1.97	0.125903	100	3.9856	NA	0	0
UA3751-6	UA3751	167.67	64.3039	1.02917	16.0739	5.96325	0.148226	1.39271	3.92173	4.78698	2.27272	0.138748	100	4.36271	NA	0	0
UA3751-29	UA3751	167.67	64.541	0.909486	16.028	5.95481	0.20932	1.23562	3.65482	5.12127	2.21464	0.169149	100	4.41229	NA	0	0
UA3751-30	UA3751	167.67	65.3714	1.05285	16.0223	6.08316	0.132449	1.45733	4.22111	4.09478	1.4571	0.138985	100	10.7206	NA	0	0
UA3751-46	UA3751	167.67	65.5042	0.903857	15.9422	5.66252	0.144404	1.11535	3.2123	5.07691	2.31978	0.153043	100	1.78303	NA	0	0
UA3751-12	UA3751	167.67	66.3236	0.636449	15.5454	4.82608	0.183544	0.663023	2.37773	5.16285	4.07574	0.265445	100	3.00864	NA	0.00100439	0
UA3751-7	UA3751	167.67	66.7483	0.651495	16.2696	4.57867	0.172885	0.71571	2.56769	5.67327	2.46477	0.203515	100	5.88169	NA	0	0
UA3751-35	UA3751	167.67	66.8739	0.83121	15.1952	5.22577	0.145157	0.825273	2.64175	5.83026	2.33212	0.128173	100	6.60516	NA	0	0
UA3751-28	UA3751	167.67	67.5095	0.683156	15.5136	4.72107	0.209082	0.677299	2.51598	5.73867	2.31143	0.155441	100	4.23611	NA	0	0
UA3751-5	UA3751	167.67	67.6441	0.690027	15.3978	4.6248	0.184878	0.677912	2.34566	5.85936	2.44676	0.166245	100	4.28242	NA	0	0
UA3751-9	UA3751	167.67	67.774	0.738603	15.6938	4.12802	0.175592	0.892624	2.98608	5.19484	2.29658	0.154767	100	3.31796	NA	0	0
UA3751-17	UA3751	167.67	68.1125	0.553021	15.5621	4.40875	0.213981	0.594668	2.05844	5.97607	2.40237	0.152517	100	5.71366	NA	0	0
UA3751-36	UA3751	167.67	68.1445	0.655515	15.289	4.54777	0.141628	0.646347	2.32293	5.28571	2.78991	0.228099	100	7.08526	NA	7.4596e-07	0
UA3751-10	UA3751	167.67	68.1627	0.638018	15.2381	4.41964	0.207527	0.669046	2.16136	6.00671	2.39204	0.135444	100	6.78759	NA	0	0
UA3751-25	UA3751	167.67	68.2706	0.634944	15.4959	4.25532	0.212024	0.57792	1.98953	5.96118	2.46846	0.173159	100	7.01608	NA	0	0
UA3751-3	UA3751	167.67	68.3327	0.55749	15.4454	4.34485	0.208737	0.570911	2.06523	6.02737	2.31703	0.168115	100	5.68134	NA	0	0
UA3751-18	UA3751	167.67	68.4808	0.615658	15.1983	4.43231	0.217496	0.533911	2.10949	5.82576	2.46769	0.153047	100	4.08475	NA	0	0
UA3751-37	UA3751	167.67	68.5294	0.559102	15.3481	4.31343	0.191408	0.548759	2.01604	5.93689	2.43623	0.155836	100	5.55676	NA	0	0
UA3751-32	UA3751	167.67	68.5396	0.582912	15.1865	4.43131	0.176059	0.569233	2.0316	5.8855	2.45538	0.183282	100	4.84474	NA	0	0
UA3751-23	UA3751	167.67	68.5848	0.524282	15.337	4.32617	0.142057	0.52862	2.07884	5.91907	2.4147	0.186665	100	7.15813	NA	0	0
UA3751-41	UA3751	167.67	68.5871	0.558608	15.3725	4.31905	0.180127	0.593893	2.12245	5.52506	2.62942	0.144312	100	6.41024	NA	0	0
UA3751-40	UA3751	167.67	68.6168	0.671367	15.3026	4.38497	0.233934	0.551965	2.1312	5.63514	2.33297	0.179502	100	3.38693	NA	0	0
UA3751-38	UA3751	167.67	68.6436	0.61619	15.2019	4.13833	0.208808	0.5013	2.10327	6.05417	2.40096	0.169648	100	4.61366	NA	0	0
UA3751-26	UA3751	167.67	68.6946	0.644342	15.0776	4.50448	0.187332	0.579181	2.05992	5.57585	2.5644	0.145009	100	7.33158	NA	0	0
UA3751-21	UA3751	167.67	69.0338	0.624412	15.3389	4.1985	0.198195	0.540417	2.05329	5.45296	2.43924	0.15532	100	8.14152	NA	0	0
UA3751-22	UA3751	167.67	69.1072	0.584605	15.0381	4.07091	0.131098	0.784603	2.99145	5.10868	2.05981	0.159435	100	6.72378	NA	0	0
UA3751-39	UA3751	167.67	69.6179	0.622978	14.6712	4.37441	0.14701	0.543143	1.90685	5.50841	2.49981	0.139861	100	6.43876	NA	0	0
UA3751-27	UA3751	167.67	70.0725	0.548986	14.9176	3.93365	0.0986916	0.586215	2.5503	4.9927	2.20055	0.127634	100	4.11245	NA	0	0
UA3751-42	UA3751	167.67	70.3348	0.603687	14.4754	3.3266	0.0945746	0.45754	1.95671	4.6633	3.92094	0.214952	100	6.23169	NA	1.35372e-06	0
UA3751-49	UA3751	167.67	70.4828	0.452008	14.8698	3.34381	0.1292	0.324048	1.52613	5.57828	3.14488	0.192414	100	5.14429	NA	0	0
UA3751-20	UA3751	167.67	70.5337	0.575859	14.3644	3.98938	0.123	0.318515	1.54002	4.91608	3.47698	0.209182	100	7.27472	NA	0.00600094	0
UA3751-2	UA3751	167.67	70.5664	0.414468	14.8342	3.99364	0.165871	0.235491	1.51239	5.63788	2.48834	0.195486	100	8.1082	NA	0.001	0
UA3751-47	UA3751	167.67	70.7204	0.460255	14.7301	3.34093	0.159665	0.318103	1.49366	5.35107	3.22485	0.259547	100	5.5982	NA	2.23771e-07	0
UA3751-16	UA3751	167.67	70.7993	0.377957	14.5912	4.12326	0.187474	0.202866	1.53126	5.50678	2.52238	0.203333	100	9.36134	NA	0	0
UA3751-4	UA3751	167.67	72.189	0.333628	14.2019	3.40748	0.144871	0.113301	1.08724	5.49879	2.86339	0.207344	100	7.39414	NA	1.61722e-07	0
UA3751-48	UA3751	167.67	72.6058	0.283118	14.3313	2.74785	0.0585301	0.152236	1.00408	4.79721	3.84188	0.230034	100	6.02618	NA	0.001	0
UA3751-50	UA3751	167.67	74.4355	0.325558	13.7003	1.81825	0.105058	0.207016	0.962433	4.11802	4.16559	0.209703	100	7.24967	NA	6.29572e-05	0
UA3751-33	UA3751	167.67	75.1703	0.392904	13.3149	1.93821	0.0611546	0.33593	1.78229	4.14296	2.71596	0.187776	100	5.891	NA	0.00100213	0
UA3751-19	UA3751	167.67	75.3935	0.325807	13.0282	1.9006	0.00606549	0.338003	1.95737	4.18477	2.69631	0.218663	100	7.88867	NA	0.00300742	0
UA3751-15	UA3751	167.67	75.633	0.34393	13.1362	1.84492	0.0346545	0.41768	1.81209	4.021	2.61935	0.177173	100	7.1348	NA	0	0
UA3751-14	UA3751	167.67	76.3557	0.127934	13.3883	0.89022	0.0621774	0.152355	0.815038	4.25305	3.88591	0.0896834	100	7.66738	NA	0	0
UA3751-8	UA3751	167.67	76.8082	0.115098	13.4713	0.763738	0.169054	0.0920339	0.872572	4.03197	3.59498	0.104711	100	8.16642	NA	0	0
UA3751-43	UA3751	167.67	77.1111	0.117255	12.9999	0.876056	0.095481	0.2178	1.21243	4.20682	3.00976	0.198151	100	5.21361	NA	0	0
UA3751-24	UA3751	167.67	77.4537	0.240594	12.6219	1.23332	0.0744031	0.202276	1.19431	4.05269	2.80826	0.153031	100	8.09249	NA	0	0
UA3751-45	UA3751	167.67	77.7478	0.141493	12.6711	1.12441	0.077077	0.198844	1.09569	4.4217	2.41404	0.139295	100	6.40787	NA	0	0
UA3751-11	UA3751	167.67	78.0237	0.205334	12.3527	1.07164	0.0620044	0.18553	1.09589	4.36548	2.4884	0.192697	100	7.41625	NA	0	0
UA3751-13	UA3751	167.67	78.0334	0.195933	12.5213	1.15526	0.062549	0.193479	1.11955	4.15123	2.44297	0.160539	100	8.19205	NA	0	0
UA3751-34	UA3751	167.67	78.4434	0.102698	12.3435	1.09678	0.0652119	0.191725	1.04993	4.21455	2.37975	0.145321	100	7.23326	NA	0	0
ID3506_3	ID3506	NA	74.5459	0.083114	13.4208	1.56886	0.0297431	0.0464463	0.754375	4.20368	5.10863	0.30794	100	0.252647	NA	0.00500274	0
ID3506_3	ID3506	NA	74.8792	0.0522203	13.1576	1.56468	0.0185441	0.0579244	0.738633	4.15968	5.12306	0.320749	100	0.965722	NA	0.0290049	0
ID3506_3	ID3506	NA	74.3061	0.0803223	12.9736	2.24291	0.0949746	0.0645344	0.932229	3.98596	5.06864	0.32389	100	0.411218	NA	0.015	0
ID3506_3	ID3506	NA	75.0168	0.0643498	13.0608	1.63069	0.0284254	0.0392025	0.710196	4.0446	5.15737	0.319642	100	0.585522	NA	0.0350015	0
OldCrow_3	OldCro	NA	75.6138	0.260582	13.2053	1.65542	0.0106684	0.247926	1.39856	3.66484	3.73039	0.274489	100	7.24959	NA	0.998795	1
OldCrow_3	OldCro	NA	75.0844	0.343462	13.0394	1.762	0.0904787	0.272687	1.52439	3.9253	3.73913	0.282399	100	4.71461	NA	0.999426	1
OldCrow_3	OldCro	NA	75.1194	0.29916	12.9101	1.77933	0.0473922	0.280832	1.49405	3.87629	3.98364	0.270926	100	4.556	NA	0.972912	1
OldCrow_3	OldCro	NA	75.5568	0.244663	12.8675	1.7435	0.0783792	0.320346	1.4458	3.79058	3.75552	0.254314	100	4.39043	NA	0.999634	1
UA3752-10	UA3752	201.82	62.8048	1.15358	16.5367	5.96635	0.166744	1.95667	5.05689	4.6617	1.57903	0.151918	100	3.07357	199.29 ka	0	0
UA3752-4	UA3752	201.82	67.0517	0.740789	15.5787	5.28306	0.176507	0.740914	2.58486	5.36884	2.3005	0.224958	100	2.80009	NA	0	0
UA3752-20	UA3752	201.82	67.0996	0.738697	15.7148	4.71979	0.168066	0.801345	2.53961	5.74423	2.34079	0.171893	100	2.8323	NA	0	0
UA3752-1	UA3752	201.82	67.6436	0.806662	15.2325	4.88138	0.194365	0.768975	2.3303	5.66196	2.36801	0.144982	100	1.56787	NA	0	0
UA3752-18	UA3752	201.82	67.7134	0.608512	15.6544	4.5954	0.178245	0.793825	2.44875	5.47527	2.38404	0.191309	100	2.84061	NA	0	0
UA3752-31	UA3752	201.82	67.9967	0.654383	15.5255	4.47245	0.190921	0.581571	2.33131	5.59924	2.52603	0.157383	100	6.51679	NA	0	0
UA3752-33	UA3752	201.82	68.0258	0.659878	15.2599	4.78891	0.153834	0.595492	2.55631	5.34526	2.48816	0.163308	100	2.42777	NA	0	0
UA3752-49	UA3752	201.82	68.0732	0.804914	14.9729	4.966	0.241695	0.695367	2.32163	5.52624	2.29897	0.127983	100	2.35987	NA	0	0
UA3752-13	UA3752	201.82	68.1466	0.595836	15.1892	4.54479	0.159813	0.64433	2.31483	5.9916	2.27829	0.174054	100	2.20846	NA	0	0
UA3752-25	UA3752	201.82	68.2312	0.686361	15.56	4.35713	0.170449	0.519667	2.10375	5.7063	2.52075	0.186583	100	2.47908	NA	0	0
UA3752-42	UA3752	201.82	68.4332	0.506895	15.767	4.18042	0.198662	0.595332	1.92734	5.6992	2.47115	0.28519	100	10.3367	NA	0	0
UA3752-47	UA3752	201.82	68.4707	0.52813	15.6926	4.21533	0.155431	0.547537	2.0448	5.72138	2.49227	0.170229	100	5.20099	NA	0	0
UA3752-7	UA3752	201.82	68.7488	0.7974	15.6064	5.40842	0.216219	0.807135	2.64027	3.34602	2.28498	0.186228	100	3.69538	NA	0	0
UA3752-40	UA3752	201.82	68.8588	0.602761	15.3493	4.19441	0.169827	0.557837	2.05591	5.63046	2.47016	0.14278	100	5.57737	NA	0	0
UA3752-27	UA3752	201.82	68.8604	0.530469	15.3377	4.25431	0.16232	0.602419	1.94163	5.62554	2.55759	0.164734	100	2.78832	NA	0	0
UA3752-46	UA3752	201.82	69.0227	0.498886	14.9068	4.40658	0.153772	0.465514	2.10811	5.19115	3.09582	0.194634	100	8.69169	NA	1.81858e-06	0
UA3752-21	UA3752	201.82	69.0654	0.637736	15.2198	4.22982	0.190954	0.551517	2.08923	5.59288	2.31291	0.141808	100	1.84375	NA	0	0
UA3752-5	UA3752	201.82	69.5061	0.467639	16.1913	1.94547	0.119911	0.317603	0.706065	6.18781	4.49703	0.0788965	100	4.63841	NA	0	0
UA3752-28	UA3752	201.82	69.7382	0.478131	15.0762	3.78335	0.114839	0.420174	1.7706	5.79893	2.65775	0.208983	100	4.28108	NA	0	0
UA3752-37	UA3752	201.82	69.8078	0.565902	14.4449	4.1347	0.152214	0.486865	1.69157	5.79909	2.81223	0.135166	100	5.32307	NA	0	0
UA3752-41	UA3752	201.82	70.4021	0.45337	15.176	3.21266	0.202478	0.356506	1.50981	5.78036	2.73466	0.222169	100	7.01298	NA	0.001	0
UA3752-39	UA3752	201.82	70.5183	0.520045	14.5669	3.84879	0.148825	0.380089	1.69682	5.32858	2.82609	0.213663	100	6.14087	NA	2.07679e-07	0
UA3752-19	UA3752	201.82	71.5295	0.401644	14.2768	2.81211	0.0417849	0.332737	1.3311	4.42172	4.64904	0.263012	100	5.40598	NA	0.001	0
UA3752-8	UA3752	201.82	71.9995	0.255203	14.3179	3.43453	0.142587	0.109409	1.0737	5.76856	2.75359	0.187377	100	6.01746	NA	0	0
UA3752-29	UA3752	201.82	72.0567	0.249296	14.112	3.54127	0.154859	0.15872	1.10511	5.53321	2.91298	0.227153	100	6.24474	NA	2.13397e-07	0
UA3752-26	UA3752	201.82	74.1676	0.275726	13.442	2.06042	0.0825401	0.191692	1.01347	4.23533	4.35692	0.225057	100	5.80093	NA	0.0030087	0
UA3752-24	UA3752	201.82	74.274	0.333372	13.5149	1.90818	0.0747408	0.190058	1.04625	4.32297	4.19286	0.184233	100	5.40507	NA	0.0020128	0
UA3752-43	UA3752	201.82	74.5213	0.255347	13.4596	2.06275	0.0912707	0.206004	0.992976	4.13124	4.10367	0.227113	100	6.70066	NA	0.00461296	0
UA3752-23	UA3752	201.82	74.6938	0.297454	13.3388	1.78271	0.037396	0.236058	1.14495	3.78991	4.47799	0.259694	100	5.44701	NA	0.0431157	0
UA3752-48	UA3752	201.82	74.701	0.292058	13.475	1.68424	0.0665393	0.20622	1.0814	4.04296	4.27547	0.226158	100	7.74322	NA	0.0101476	0
UA3752-50	UA3752	201.82	74.7317	0.370168	13.3344	1.63188	0.00593743	0.201907	1.14385	3.84416	4.55989	0.227399	100	6.01988	NA	0.0281004	0
UA3752-16	UA3752	201.82	74.893	0.275412	13.2084	1.70594	0.0614311	0.197455	1.14525	3.90324	4.42225	0.242226	100	5.61126	NA	0.00892043	0
UA3752-35	UA3752	201.82	75.0687	0.251583	13.3162	1.58865	0.0166355	0.171755	1.10924	3.88959	4.3354	0.325867	100	6.96385	NA	0.0186419	0
UA3752-38	UA3752	201.82	75.2403	0.250495	13.1377	1.69511	0.0469213	0.198233	1.09134	3.85589	4.29312	0.246431	100	7.31924	NA	0.0340598	0
UA3752-3	UA3752	201.82	75.7051	0.133316	13.3757	1.675	0.0824544	0.0574216	0.596524	3.04106	5.23279	0.130058	100	7.38153	NA	0.008	0
UA3752-22	UA3752	201.82	75.7624	0.143552	14.1956	0.780203	0.191764	0.134672	1.31816	4.22532	3.16674	0.105311	100	6.92935	NA	0	0
UA3752-32	UA3752	201.82	75.9831	0.16242	13.6562	0.909293	0.0390456	0.137802	0.824883	4.30861	3.90941	0.0894142	100	5.9612	NA	0	0
UA3752-17	UA3752	201.82	76.2099	0.0954344	13.6915	0.844323	0.0211622	0.127488	0.784253	4.30305	3.84465	0.101146	100	6.29061	NA	0	0
UA3752-9	UA3752	201.82	76.4083	0.0803935	13.1367	1.16499	0.0399589	0.061402	0.864665	2.92388	5.27722	0.054824	100	4.34669	NA	0	0
UA3752-15	UA3752	201.82	76.812	0.083618	12.4602	1.04634	0.00603506	0.0117152	0.659488	2.91813	5.94009	0.0804465	100	6.16498	NA	0	0
UA3752-11	UA3752	201.82	77.0287	0.103479	13.1447	0.816432	0.141421	0.089484	0.835119	3.99152	3.73547	0.146927	100	6.86151	NA	0	0
UA3752-36	UA3752	201.82	77.1708	0.228867	12.5168	1.29686	0.0344826	0.11992	0.812903	4.03966	3.66127	0.153014	100	6.15266	NA	3.75087e-05	0
UA3752-44	UA3752	201.82	77.2252	0.0294246	13.3598	0.825775	0.082336	0.0750532	0.875238	3.79566	3.63552	0.123943	100	8.26368	NA	0.001	0
UA3752-30	UA3752	201.82	77.7771	0.244688	12.6709	1.10907	0.0651779	0.157038	1.06243	4.38111	2.40721	0.161737	100	6.66615	NA	0	0
UA3752-34	UA3752	201.82	78.2155	0.190879	12.431	1.07682	0.0762734	0.179154	1.05636	4.25162	2.39621	0.163021	100	5.70629	NA	0	0
UA3752-6	UA3752	201.82	78.3707	0.131145	12.376	1.08198	0.0474887	0.202914	1.10146	4.0969	2.46947	0.157416	100	7.53801	NA	0	0
UA3752-45	UA3752	201.82	78.389	0.20417	12.4242	1.09255	0.0654871	0.183309	1.04976	4.05748	2.41155	0.158216	100	8.19115	NA	0	0
UA3752-14	UA3752	201.82	78.3937	0.161474	12.3385	1.04249	0.0903973	0.173144	1.05087	4.1593	2.45623	0.172903	100	5.97834	NA	0	0
UA3752-2	UA3752	201.82	78.4344	0.167192	12.3054	1.0938	0.0574577	0.178518	0.997681	4.31908	2.32973	0.150874	100	6.34844	NA	0	0
UA3752-12	UA3752	201.82	78.4976	0.213639	12.1833	1.06448	0.0723388	0.162124	1.07047	4.19189	2.4286	0.149338	100	6.00205	NA	0	0
UA3754-3	UA3754	219.78	62.5933	1.08859	15.7899	6.49621	0.251354	1.78639	4.55198	5.43967	1.89815	0.134845	100	4.09019	213.04 ka	0	0
UA3754-10	UA3754	219.78	66.227	0.744677	14.8473	6.11973	0.179762	0.745876	3.11713	5.50205	2.34759	0.218069	100	3.07507	NA	0	0
UA3754-4	UA3754	219.78	68.2404	0.794883	15.3595	4.11767	0.189358	0.843164	2.73144	5.15957	2.40964	0.199301	100	4.50832	NA	0	0
UA3754-8	UA3754	219.78	68.6663	0.432729	17.1204	3.11093	0.10946	0.237789	3.44088	5.47709	1.3172	0.112853	100	6.79919	NA	6.99666e-07	0
UA3754-2	UA3754	219.78	69.3701	0.552961	15.0583	4.23672	0.203756	0.520723	1.89424	5.55354	2.47191	0.177973	100	5.17498	NA	0	0
UA3754-6	UA3754	219.78	70.9692	0.408253	14.5231	3.75999	0.139808	0.262639	1.59535	5.34953	2.79633	0.252755	100	6.29155	NA	0	0
UA3754-9	UA3754	219.78	73.4004	0.418895	14.7051	2.23671	0.0916797	0.53579	1.96918	4.87631	1.67665	0.115335	100	8.29154	NA	0	0
UA3754-5	UA3754	219.78	74.3084	0.294288	13.495	2.16569	0.0491072	0.157615	1.02596	3.9969	4.30881	0.25591	100	6.17466	NA	0.00206647	0
UA3754-12	UA3754	219.78	74.4019	0.317404	13.3636	1.95478	0	0.16688	1.05483	4.07238	4.4817	0.240941	100	6.24568	NA	0.0180425	0
UA3754-1	UA3754	219.78	74.8946	0.3331	13.3301	1.71827	0.031782	0.221118	1.15741	3.83425	4.29526	0.237616	100	7.82819	NA	0.0502541	0
UA3754-11	UA3754	219.78	78.0239	0.214784	12.7247	1.06663	0.0487969	0.183898	1.03122	4.15096	2.4378	0.15179	100	7.78307	NA	0	0
UA3754-7	UA3754	219.78	78.2023	0.149923	12.5947	1.13026	0.0777051	0.175236	1.05104	4.1498	2.35964	0.141382	100	8.01382	NA	0	0
OldCrow_4	OldCro	NA	75.2833	0.278518	13.0126	1.71364	0.0821577	0.273868	1.44886	3.88529	3.80492	0.280097	100	3.7996	NA	0.999428	1
OldCrow_4	OldCro	NA	75.3647	0.295317	12.7942	1.76428	0.0663821	0.236044	1.4567	3.98908	3.82558	0.268438	100	4.28895	NA	0.984135	1
OldCrow_4	OldCro	NA	75.5389	0.271426	12.7444	1.73606	0.0836196	0.284058	1.43551	3.87723	3.82035	0.269204	100	3.74388	NA	0.998434	1
OldCrow_4	OldCro	NA	75.6165	0.339282	12.7723	1.66634	0.0653412	0.280411	1.44922	3.73753	3.84562	0.293538	100	4.8976	NA	0.998517	1
OldCrow_4	OldCro	NA	76.5891	0.258907	12.8962	1.76335	0.0604191	0.250369	1.42739	2.85786	3.67523	0.285708	100	1.80762	NA	0.745616	0
OldCrow_4	OldCro	NA	75.69	0.318097	12.7256	1.56115	0.0491074	0.29873	1.52019	3.6444	3.95821	0.302987	100	5.07946	NA	0.986843	1
OldCrow_001	OldCro	NA	78.0106	0.0454664	13.4657	1.7694	0.0642921	0.287269	1.56918	4.20072	0.331594	0.330436	100	7.38216	NA	0.0130011	0
OldCrow_001	OldCro	NA	76.7653	0.228294	13.2099	1.77775	0.0245681	0.318297	1.47996	3.96556	2.0083	0.286823	100	4.27031	NA	0.047026	0
OldCrow_001	OldCro	NA	75.7107	0.292634	13.0766	1.68855	0.0624229	0.276168	1.47826	3.72392	3.4768	0.276338	100	4.81532	NA	0.999061	1
OldCrow_001	OldCro	NA	75.8071	0.31095	12.8898	1.67367	0.0476683	0.286855	1.45944	3.78323	3.54754	0.250137	100	4.40807	NA	0.99845	1
OldCrow_001	OldCro	NA	75.3284	0.364705	12.9923	1.71141	0.053243	0.301259	1.48493	3.84415	3.72021	0.257623	100	4.10384	NA	0.999723	1
OldCrow_001	OldCro	NA	75.0455	0.347813	13.0177	1.76076	0.0549676	0.24956	1.50151	3.86087	3.9124	0.321372	100	4.64936	NA	0.995074	1
UA3754-38	UA3754	219.78	56.9231	1.95386	16.1186	9.26664	0.255303	2.91378	6.74049	4.52166	1.22145	0.109964	100	3.26514	213.04 ka	0	0
UA3754-39	UA3754	219.78	59.3206	1.68959	15.4385	9.09585	0.208328	2.2728	5.38367	4.63773	1.82878	0.160363	100	2.50363	NA	0	0
UA3754-21	UA3754	219.78	64.082	0.846041	16.361	5.65695	0.190694	1.14491	3.33285	4.87435	3.40817	0.133128	100	1.64023	NA	0	0
UA3754-15	UA3754	219.78	65.4919	0.759475	16.9522	4.34188	0.0838918	0.729732	3.69292	5.90991	1.9625	0.0977533	100	1.43969	NA	0	0
UA3754-3	UA3754	219.78	66.3266	0.904085	15.2099	5.3967	0.20487	1.01891	2.96517	5.42673	2.43216	0.148256	100	2.35651	NA	0	0
UA3754-14	UA3754	219.78	67.389	0.557863	15.1556	4.68375	0.172531	0.535046	2.08678	5.03301	4.21154	0.225914	100	5.8772	NA	1.98611e-06	0
UA3754-27	UA3754	219.78	68.3339	0.602266	15.3082	4.63431	0.178363	0.637394	2.20023	5.62386	2.36057	0.156187	100	2.38289	NA	0	0
UA3754-34	UA3754	219.78	68.494	0.56847	15.3048	4.45134	0.156938	0.625304	2.08	5.87568	2.34632	0.125611	100	4.02878	NA	0	0
UA3754-23	UA3754	219.78	68.7857	0.52224	15.1453	4.19537	0.188538	0.436286	1.97837	5.80868	2.76203	0.229249	100	2.48466	NA	3.29792e-06	0
UA3754-33	UA3754	219.78	69.2839	0.96324	14.4851	4.02296	0.0699815	0.872714	2.49274	4.0838	3.6925	0.0426431	100	1.19386	NA	0	0
UA3754-40	UA3754	219.78	69.3239	0.603352	15.0764	3.93416	0.177894	0.65231	2.04932	5.33783	2.67706	0.216736	100	2.10326	NA	0	0
UA3754-35	UA3754	219.78	69.3535	0.518583	15.2964	3.95978	0.245339	0.42728	1.85496	5.6974	2.4728	0.224622	100	5.90961	NA	0	0
UA3754-28	UA3754	219.78	69.8294	0.530197	15.1587	3.97792	0.199321	0.356216	1.78776	5.42721	2.59527	0.178204	100	5.65206	NA	0	0
UA3754-25	UA3754	219.78	70.7564	0.504199	14.8884	3.37624	0.154003	0.401661	1.56129	5.48659	2.70268	0.217687	100	6.52643	NA	0	0
UA3754-11	UA3754	219.78	71.095	0.459446	14.961	3.30568	0.140074	0.360269	1.53847	5.44759	2.52958	0.210306	100	6.61262	NA	0.001	0
UA3754-2	UA3754	219.78	72.0251	0.386383	13.8485	3.43688	0.168936	0.184222	1.41459	5.21081	3.15373	0.22062	100	5.59823	NA	1.84365e-06	0
UA3754-19	UA3754	219.78	74.2813	0.276923	13.346	1.97704	0.0523391	0.172357	1.04503	4.13052	4.50016	0.281869	100	7.28915	NA	0.00900728	0
UA3754-30	UA3754	219.78	74.3782	0.373805	13.5431	1.95184	0.0437781	0.175912	0.993089	4.06543	4.25763	0.280599	100	4.95018	NA	0.00211962	0
UA3754-4	UA3754	219.78	74.4267	0.32905	13.471	1.94161	0.0292738	0.171037	1.02118	4.09638	4.35651	0.202955	100	5.89203	NA	0.00209387	0
UA3754-10	UA3754	219.78	74.5107	0.260903	13.3637	1.98219	0.039458	0.169864	0.999037	4.17047	4.31208	0.247327	100	5.62874	NA	0.0121768	0
UA3754-9	UA3754	219.78	74.6331	0.299772	13.3629	2.02	0.048662	0.162261	1.01426	3.8841	4.36733	0.268217	100	6.47519	NA	0.025158	0
UA3754-18	UA3754	219.78	74.8315	0.311142	13.2557	1.78442	0.0424757	0.195271	1.14972	3.89175	4.36217	0.22704	100	5.36005	NA	0.0073831	0
UA3754-29	UA3754	219.78	75.0585	0.319144	13.0103	1.69794	0.0683342	0.216924	1.12638	3.94069	4.36804	0.250259	100	4.54708	NA	0.014806	0
UA3754-36	UA3754	219.78	75.4879	0.0471558	13.5093	1.2386	0.0984518	0.0498471	1.01829	3.03693	5.44843	0.0842011	100	5.51315	NA	0.001	0
UA3754-17	UA3754	219.78	76.5778	0.114809	13.5677	1.34234	0.0655086	0.0189818	0.506914	3.34239	4.43	0.0433564	100	6.85798	NA	0	0
UA3754-32	UA3754	219.78	77.6815	0.16072	13.0501	0.933478	0.104717	0.190228	1.2438	4.0964	2.47574	0.0816512	100	4.42024	NA	0	0
UA3754-24	UA3754	219.78	77.9166	0.180156	12.6886	1.15671	0.0476807	0.209614	1.04168	4.14954	2.48154	0.165128	100	6.66044	NA	0	0
UA3754-6	UA3754	219.78	77.9444	0.180531	12.5919	1.08924	0.0204541	0.167582	1.01673	4.43449	2.43103	0.159779	100	5.52973	NA	0	0
UA3754-13	UA3754	219.78	78.0197	0.21881	12.6403	0.879544	0	0.13494	0.772701	3.8189	3.49815	0.0219193	100	5.52601	NA	0	0
UA3754-16	UA3754	219.78	78.0438	0.196549	12.5856	1.06891	0.0283024	0.200704	1.08569	4.20802	2.45297	0.167322	100	6.88783	NA	0	0
UA3754-5	UA3754	219.78	78.0512	0.16395	12.6162	1.13415	0.0558471	0.182524	1.07497	4.17225	2.41331	0.17504	100	6.09713	NA	0	0
UA3754-1	UA3754	219.78	78.1221	0.190958	12.523	1.17025	0.106575	0.205879	1.21365	3.74075	2.62812	0.127443	100	6.71428	NA	0	0
UA3754-31	UA3754	219.78	78.1531	0.214668	12.5478	1.07173	0.0633378	0.150575	1.06965	4.21173	2.41146	0.136773	100	5.63145	NA	0	0
UA3754-20	UA3754	219.78	78.4384	0.193426	12.3274	1.07447	0.0732746	0.160612	0.988096	4.09975	2.52574	0.153431	100	7.04554	NA	0	0
UA3754-7	UA3754	219.78	78.5106	0.211782	12.1581	1.12796	0.0292668	0.166736	1.04155	4.31087	2.32178	0.156783	100	5.64381	NA	0	0
UA3754-37	UA3754	219.78	78.5367	0.139891	12.4988	1.03276	0	0.179913	1.04127	4.0831	2.37334	0.147501	100	7.53401	NA	0	0
UA3754-26	UA3754	219.78	78.8744	0.186557	12.1139	1.13325	0.0311993	0.142333	1.0684	4.02468	2.29167	0.17252	100	6.41445	NA	0	0
UA3755-23	UA3755	238.17	63.5548	1.02995	15.5989	6.5704	0.251396	1.43376	3.96681	5.19578	2.24978	0.191784	100	3.14769	236.36 ka	0	0
UA3755-12	UA3755	238.17	67.0868	0.734539	15.7179	4.81989	0.149809	0.81115	2.76175	5.48194	2.31658	0.154634	100	2.37105	NA	0	0
UA3755-7	UA3755	238.17	69.0941	0.619056	15.464	3.87154	0.195278	0.660729	2.12451	5.38682	2.45511	0.16635	100	5.89981	NA	0	0
UA3755-8	UA3755	238.17	69.3773	0.382598	14.7832	4.46124	0.217476	0.263581	1.92847	5.3865	3.02123	0.230512	100	5.40979	NA	4.80613e-06	0
UA3755-11	UA3755	238.17	69.502	0.644766	14.9556	3.53856	0.110042	0.507664	2.01419	4.71363	3.85563	0.203973	100	5.78912	NA	3.54227e-07	0
UA3755-18	UA3755	238.17	69.5431	1.02601	14.217	3.98862	0.0561335	0.855364	2.55092	4.04451	3.65939	0.0760945	100	1.56322	NA	0	0
UA3755-2	UA3755	238.17	70.4916	0.417177	14.9518	3.62861	0.139118	0.425832	1.47504	5.5248	2.80151	0.186612	100	6.58707	NA	0	0
UA3755-9	UA3755	238.17	70.5362	0.474635	14.6624	4.02862	0.0766708	0.366025	2.17525	4.81627	2.70359	0.207013	100	4.46825	NA	0	0
UA3755-1	UA3755	238.17	70.6252	0.501427	15.2014	3.3927	0.17608	0.377153	1.52084	5.31577	2.75531	0.173326	100	6.50739	NA	0	0
UA3755-5	UA3755	238.17	74.1586	0.377112	13.4727	2.07716	0.0911122	0.19224	1.04766	4.02616	4.37006	0.241926	100	5.70531	NA	0.00200978	0
UA3755-6	UA3755	238.17	74.1629	0.276876	13.5101	1.97579	0.053139	0.199115	1.03389	4.02841	4.55471	0.264921	100	6.11608	NA	0.00400273	0
UA3755-14	UA3755	238.17	74.2153	0.295404	13.3843	2.18364	0.0762713	0.156643	0.996584	4.09151	4.41114	0.244415	100	3.74233	NA	0.0090073	0
UA3755-25	UA3755	238.17	74.3234	0.265024	13.538	1.98074	0.0679666	0.217147	1.04014	4.10243	4.27517	0.245474	100	6.24957	NA	0.00408659	0
UA3755-3	UA3755	238.17	74.3381	0.295276	13.3426	1.90032	0.0862035	0.242754	0.989117	4.07575	4.57058	0.20568	100	5.12447	NA	0.00500305	0
UA3755-15	UA3755	238.17	74.3565	0.276274	13.5027	1.95281	0.0622768	0.174157	1.00314	4.08387	4.3787	0.27063	100	6.54631	NA	0.00303806	0
UA3755-21	UA3755	238.17	74.5463	0.350928	13.5974	1.86709	0.0444478	0.425263	1.69168	3.73743	3.56331	0.227475	100	6.48365	NA	0.550208	0
UA3755-16	UA3755	238.17	75.4158	0.422033	12.7717	1.41882	0.0101511	0.154824	0.278679	3.16358	6.36437	0	100	4.39441	NA	0	0
UA3755-4	UA3755	238.17	75.6295	0.283659	13.0577	1.77664	0.0481867	0.177789	1.08771	3.43101	4.35262	0.200253	100	5.01938	NA	0.0530822	0
UA3755-22	UA3755	238.17	76.0979	0.151465	13.3956	1.41867	0.0530186	0.227559	1.31385	4.00422	3.12902	0.269459	100	5.83303	NA	0.00509686	0
UA3755-17	UA3755	238.17	76.5056	0.232384	13.1049	1.47133	0.0685865	0.218608	1.3164	4.36487	2.56369	0.19844	100	6.96124	NA	0	0
UA3755-20	UA3755	238.17	77.7682	0.086701	12.8675	0.53245	0.149706	0.0939712	0.526516	3.02374	4.91657	0.0446556	100	7.25246	NA	0	0
UA3755-10	UA3755	238.17	77.7792	0.146	12.7833	1.29454	0.0946029	0.261787	1.48363	4.16219	1.89013	0.135059	100	6.07687	NA	0	0
UA3755-13	UA3755	238.17	77.971	0.195392	12.7337	1.09406	0.0235584	0.169642	1.00923	4.36249	2.34103	0.128994	100	5.69389	NA	0	0
UA3755-24	UA3755	238.17	78.0143	0.269518	12.5921	1.12022	0.0550415	0.194539	1.03767	4.21711	2.39954	0.129165	100	6.69945	NA	0	0
UA3755-19	UA3755	238.17	78.2521	0.134065	12.4442	1.11779	0.053247	0.192292	1.06703	4.23747	2.37909	0.158354	100	6.15254	NA	0	0
OldCrow_002	OldCro	NA	77.4373	0.0829416	13.7234	1.7675	0.0568795	0.302135	1.51631	4.07143	0.803092	0.308573	100	4.82343	NA	0.028032	0
OldCrow_002	OldCro	NA	75.2495	0.302588	13.0732	1.64711	0.0653166	0.262283	1.50664	3.90212	3.78774	0.262835	100	4.42403	NA	0.999351	1
OldCrow_002	OldCro	NA	75.3986	0.259611	13.1012	1.75792	0.0610321	0.300015	1.49237	3.7709	3.63779	0.28491	100	4.52245	NA	0.999774	1
OldCrow_002	OldCro	NA	75.3914	0.320394	13.1294	1.63628	0.0512567	0.303834	1.45594	3.77104	3.71529	0.290773	100	2.51809	NA	0.999673	1
UA3755-44	UA3755	238.17	67.9298	0.770277	15.2328	4.77214	0.193567	0.672502	2.47398	5.47006	2.33283	0.196372	100	4.11747	236.36 ka	0	0
UA3755-47	UA3755	238.17	69.6361	0.580414	15.2484	3.59165	0.187001	0.554138	1.91222	5.57235	2.56438	0.197941	100	7.22893	NA	0	0
UA3755-36	UA3755	238.17	70.6264	0.456753	14.64	3.8999	0.0991924	0.404242	2.15354	4.75189	2.78862	0.231737	100	8.06147	NA	0	0
UA3755-35	UA3755	238.17	70.7195	0.451462	14.9073	3.29579	0.127712	0.41739	1.42266	5.74075	2.76993	0.190493	100	4.69798	NA	0	0
UA3755-39	UA3755	238.17	70.839	0.433856	14.2317	4.09644	0.102258	0.409875	2.20881	4.94283	2.56157	0.224304	100	4.20501	NA	0	0
UA3755-45	UA3755	238.17	70.8673	0.456167	15.0713	3.39206	0.158841	0.371376	1.50833	5.49836	2.51065	0.213957	100	6.36183	NA	0	0
UA3755-28	UA3755	238.17	71.0252	0.455759	14.1469	4.13948	0.0928104	0.394448	2.2369	4.73142	2.62383	0.197911	100	3.14664	NA	0	0
UA3755-50	UA3755	238.17	72.6702	0.299139	14.4018	2.62571	0.0928924	0.14152	0.988523	5.18837	3.40022	0.247393	100	6.33461	NA	0	0
UA3755-42	UA3755	238.17	72.801	0.412992	13.9009	3.51095	0.135676	0.3364	1.95333	4.96297	1.83906	0.189598	100	5.47942	NA	0	0
UA3755-27	UA3755	238.17	73.8533	0.292749	13.1893	2.4197	0.0353082	0.159049	1.09504	3.77229	5.00709	0.227568	100	5.77817	NA	0.003	0
UA3755-31	UA3755	238.17	74.0582	0.306695	13.5188	2.02452	0.07972	0.241396	1.09982	4.12101	4.38389	0.214346	100	6.05875	NA	0.00100771	0
UA3755-41	UA3755	238.17	74.2252	0.283777	13.4399	2.01285	0.0927084	0.177022	0.999699	4.14196	4.43516	0.247614	100	6.09696	NA	0.00400615	0
UA3755-29	UA3755	238.17	74.2769	0.278614	13.437	2.07951	0.0483851	0.192669	0.968302	4.13487	4.39935	0.238054	100	5.42126	NA	0.00601756	0
UA3755-38	UA3755	238.17	74.5985	0.353232	13.3695	2.03407	0.0295851	0.212451	1.01157	4.05782	4.1439	0.244657	100	6.4226	NA	0.0308427	0
UA3755-33	UA3755	238.17	74.6795	0.284293	13.162	1.92777	0.0781566	0.188773	1.01985	4.03289	4.43968	0.241586	100	5.94272	NA	0.0240765	0
UA3755-34	UA3755	238.17	74.963	0.152375	13.6421	1.54837	0.0578315	0.0997443	0.962483	3.25989	5.26421	0.0645338	100	8.83686	NA	0.004	0
UA3755-49	UA3755	238.17	75.0169	0.279271	13.1613	1.81778	0.0763609	0.19214	1.06404	3.82441	4.3706	0.254779	100	5.86415	NA	0.0112894	0
UA3755-37	UA3755	238.17	75.0379	0.265352	14.3225	1.30431	0.0281203	0.378236	1.6213	4.04518	2.96806	0.0375596	100	6.30614	NA	0	0
UA3755-30	UA3755	238.17	75.3125	0.227301	13.6833	1.3753	0.0748869	0.124564	0.475797	4.60807	4.06976	0.0625883	100	7.32294	NA	0	0
UA3755-40	UA3755	238.17	76.812	0.0722714	13.3982	0.273391	0.0629618	0	0.659012	3.43535	5.26006	0.0346037	100	7.53598	NA	0	0
UA3755-46	UA3755	238.17	76.9642	0.0156957	13.6492	0.576031	0.105567	0.111737	0.7678	3.75114	4.01508	0.0562783	100	8.28081	NA	0	0
UA3755-26	UA3755	238.17	77.56	0.189655	12.3373	1.29816	0.0894042	0.186533	1.20098	3.82256	3.18998	0.162038	100	5.23264	NA	1.32091e-05	0
UA3755-43	UA3755	238.17	77.9947	0.200982	12.5887	1.10459	0.0968391	0.161364	1.05646	4.25346	2.41776	0.161635	100	7.12537	NA	0	0
UA3755-48	UA3755	238.17	78.0673	0.196458	12.5568	1.12527	0.0148511	0.156019	1.02835	4.37266	2.35663	0.162254	100	6.81478	NA	0	0
UA3745-5	UA3745	69.57	62.4762	1.29766	16.4286	6.16913	0.163817	1.89202	4.58749	4.75809	2.10371	0.159313	100	3.33996	69.57 ka	0	0
UA3745-4	UA3745	69.57	62.8016	1.12637	16.2233	6.26532	0.18252	1.70317	4.36527	4.64189	2.6038	0.1121	100	2.75097	NA	0	0
UA3745-26	UA3745	69.57	62.8291	1.27962	16.0856	6.39209	0.220828	1.75225	4.61858	4.70775	2.00879	0.13612	100	4.19419	NA	0	0
UA3745-41	UA3745	69.57	64.8095	0.997051	15.3418	6.24143	0.168295	1.13742	3.52226	4.94496	2.74233	0.12267	100	3.59256	NA	0	0
UA3745-31	UA3745	69.57	65.5745	0.895454	15.9485	4.90078	0.174148	1.30179	3.25586	4.90035	2.90197	0.189516	100	4.37385	NA	0	0
UA3745-38	UA3745	69.57	65.8701	0.823787	16.0699	5.35576	0.188913	0.879759	3.07324	5.24422	2.37919	0.148768	100	4.02898	NA	0	0
UA3745-24	UA3745	69.57	71.2789	0.584347	14.509	2.85203	0.00427023	0.551423	1.98068	4.58538	3.57353	0.103726	100	3.5181	NA	0	0
UA3745-37	UA3745	69.57	72.5229	0.31766	14.0102	2.67604	0.0533746	0.223261	1.42339	4.77647	3.81555	0.234024	100	5.1872	NA	0.004	0
UA3745-15	UA3745	69.57	72.5731	0.285567	14.002	2.5421	0.0952781	0.225677	1.48082	4.66234	3.93927	0.250367	100	7.3271	NA	0.005	0
UA3745-47	UA3745	69.57	72.6596	0.29972	14.2485	2.57623	0.0697816	0.221425	1.36459	4.41387	3.96953	0.228229	100	5.61124	NA	0.003	0
UA3745-35	UA3745	69.57	72.6954	0.270035	14.1404	2.51507	0.0719691	0.244266	1.40369	4.72767	3.74177	0.244909	100	6.83639	NA	0.005	0
UA3745-27	UA3745	69.57	72.7026	0.283718	13.9622	2.48913	0.087725	0.206193	1.44729	4.70895	3.94765	0.212677	100	3.01282	NA	0.005	0
UA3745-7	UA3745	69.57	72.8293	0.25773	14.082	2.55549	0.0297002	0.232914	1.37949	4.691	3.78246	0.206435	100	2.06799	NA	0.001	0
UA3745-33	UA3745	69.57	72.9315	0.302238	14.0242	2.58027	0.0511957	0.194906	1.37597	4.59716	3.75903	0.237148	100	3.71269	NA	0.004	0
UA3745-8	UA3745	69.57	72.9479	0.339186	14.0198	2.56838	0.0850379	0.225463	1.37003	4.36632	3.91814	0.2063	100	5.54564	NA	0.0020002	0
UA3745-30	UA3745	69.57	72.9727	0.241601	13.9942	2.54791	0.0940905	0.215313	1.31184	4.4945	3.98979	0.178373	100	6.76422	NA	0	0
UA3745-13	UA3745	69.57	73.021	0.259137	13.843	2.56031	0.039694	0.213881	1.33095	4.5769	3.97947	0.226897	100	2.57963	NA	0.003	0
UA3745-22	UA3745	69.57	73.1336	0.259339	13.9216	2.4886	0.0730192	0.199628	1.32003	4.4545	3.99729	0.196764	100	5.8467	NA	0	0
UA3745-49	UA3745	69.57	73.4601	0.369679	13.4614	2.29027	0.113328	0.309984	1.43467	4.51603	3.88782	0.202374	100	3.07463	NA	0.0150369	0
UA3745-3	UA3745	69.57	74.0197	0.289829	13.8721	1.79232	0.0437532	0.276955	1.32291	4.42854	3.79153	0.209691	100	5.03085	NA	0.0150037	0
UA3745-46	UA3745	69.57	74.0992	0.288273	13.7995	1.86896	0.032564	0.261093	1.34269	4.24054	3.88375	0.236899	100	7.19814	NA	0.00605786	0
UA3745-19	UA3745	69.57	74.1156	0.27917	13.5505	1.96653	0.0768763	0.260919	1.38286	4.26454	3.9317	0.221249	100	6.79705	NA	0.0105433	0
UA3745-14	UA3745	69.57	74.1464	0.36509	13.6966	1.8809	0.0590182	0.222246	1.35622	4.31019	3.80633	0.202619	100	3.98727	NA	0.00108622	0
UA3745-32	UA3745	69.57	74.1594	0.312776	13.6913	1.97281	0.0160727	0.268056	1.34732	4.22388	3.84419	0.212161	100	6.15791	NA	0.00231594	0
UA3745-34	UA3745	69.57	74.2131	0.287904	13.7261	1.84331	0.0737529	0.244355	1.32841	4.47221	3.62765	0.236662	100	3.3991	NA	0.00704875	0
UA3745-44	UA3745	69.57	74.6858	0.310614	13.7007	1.6713	0.0361406	0.279571	1.43659	4.1861	3.61803	0.0969183	100	4.96844	NA	0.00600571	0
UA3745-50	UA3745	69.57	74.7566	0.151211	13.9003	1.70783	0.0431399	0.256964	1.3306	4.11966	3.65903	0.0964347	100	7.55195	NA	0.00400068	0
UA3745-48	UA3745	69.57	74.8179	0.252456	13.6717	1.64901	0.0592273	0.245463	1.3854	4.15601	3.68262	0.10368	100	7.17801	NA	0.00400485	0
UA3745-6	UA3745	69.57	74.8333	0.215736	13.7565	1.61943	0.0974996	0.218852	1.44143	4.11977	3.61561	0.105708	100	6.11137	NA	0.00701229	0
UA3745-23	UA3745	69.57	74.9252	0.327284	13.7176	1.90416	0.0619639	0.2836	1.53758	4.7284	2.40413	0.142119	100	6.72627	NA	0	0
UA3745-9	UA3745	69.57	75.0832	0.261215	13.8362	1.70623	0.0589442	0.329734	1.34313	5.06197	2.17443	0.187255	100	5.88387	NA	0.002	0
UA3745-29	UA3745	69.57	75.0865	0.206669	13.547	1.69885	0.036768	0.205776	1.38198	4.06433	3.7018	0.0909659	100	6.61441	NA	0.00601023	0
UA3745-1	UA3745	69.57	75.1008	0.249464	13.5638	1.69048	0.0435372	0.196355	1.35186	4.14839	3.57729	0.100633	100	4.62184	NA	7.6318e-06	0
UA3745-39	UA3745	69.57	75.1075	0.234954	13.4899	1.78197	0.0690456	0.224328	1.371	4.12373	3.51282	0.109495	100	6.58054	NA	0.00408547	0
UA3745-16	UA3745	69.57	75.1714	0.297689	12.873	1.73012	0.053951	0.278843	1.44222	3.99655	3.90316	0.326801	100	5.29546	NA	0.982029	1
UA3745-17	UA3745	69.57	75.1883	0.258108	13.3645	1.64609	0.0429566	0.207258	1.41178	4.18954	3.59478	0.124865	100	3.60505	NA	0.049058	0
UA3745-12	UA3745	69.57	75.2806	0.212247	13.8192	1.67716	0.113958	0.260909	1.43554	5.02584	2.0451	0.16712	100	5.22378	NA	0	0
UA3745-28	UA3745	69.57	75.2843	0.209935	13.4667	1.6403	0.0585419	0.223619	1.3045	4.15587	3.57214	0.108573	100	3.77154	NA	0.00600546	0
UA3745-2	UA3745	69.57	75.3036	0.261144	13.5914	1.5111	0.0707732	0.19021	1.39293	3.97915	3.59406	0.136305	100	6.05479	NA	0.00925088	0
UA3745-36	UA3745	69.57	75.375	0.325734	13.2378	1.77895	0.0531569	0.267569	1.46465	3.55174	3.78366	0.208945	100	7.21251	NA	0.97836	1
UA3745-45	UA3745	69.57	75.4123	0.227553	13.5721	1.69089	0.0524176	0.26363	1.32849	3.72625	3.62272	0.133938	100	8.23892	NA	0.0475157	0
UA3745-40	UA3745	69.57	75.6401	0.289045	13.7898	1.57962	0.0711904	0.272705	1.33488	4.84555	2.06461	0.145233	100	7.3948	NA	0.002	0
UA3745-18	UA3745	69.57	76.4308	0.123549	12.9161	1.23722	0.0732637	0.0869743	0.92263	3.93146	4.19422	0.108127	100	5.79515	NA	8.36445e-07	0
UA3745-11	UA3745	69.57	76.4511	0.185406	13.3711	1.51545	0.0914963	0.304862	1.68108	4.33436	1.97466	0.116972	100	6.02568	NA	0	0
UA3745-21	UA3745	69.57	76.4856	0.245633	13.5913	1.51654	0.0493386	0.280703	1.62259	4.21829	1.86877	0.156537	100	7.81257	NA	0	0
UA3745-43	UA3745	69.57	76.5457	0.0995727	12.9593	1.31371	0.0777318	0.161722	1.04485	3.78332	3.93124	0.106978	100	8.06213	NA	4.84792e-06	0
UA3745-42	UA3745	69.57	76.7348	0.182982	13.4734	1.50631	0.119749	0.240392	1.67638	3.99198	1.94675	0.164493	100	8.18284	NA	0	0
UA3745-10	UA3745	69.57	77.4144	0.101809	13.0128	0.748438	0.0976775	0.178582	1.09108	3.7482	3.51116	0.123731	100	6.13494	NA	0	0
UA3745-25	UA3745	69.57	77.4314	0.131061	12.938	0.86602	0.0587098	0.117525	1.14271	3.57555	3.59292	0.188683	100	8.50762	NA	0.0051066	0
UA3745-20	UA3745	69.57	77.6229	0.0886161	12.9439	0.782367	0.0694809	0.0998676	0.941802	3.68874	3.67255	0.115857	100	6.6434	NA	0	0
OldCrow_003	OldCro	NA	75.2451	0.332657	12.9846	1.72461	0.0623419	0.277427	1.50635	3.86122	3.79759	0.268716	100	5.03183	NA	0.99958	1
OldCrow_003	OldCro	NA	75.4177	0.298422	13.1438	1.71139	0.0700649	0.268919	1.47597	3.87585	3.52918	0.269646	100	5.57466	NA	0.999226	1
OldCrow_003	OldCro	NA	75.2767	0.32901	12.8472	1.75098	0.0593599	0.258646	1.50772	3.85784	3.90139	0.272589	100	4.70668	NA	0.99896	1
OldCrow_003	OldCro	NA	75.0298	0.352171	13.1537	1.77048	0.0817945	0.302539	1.45259	3.79585	3.85657	0.264169	100	5.48511	NA	0.99818	1
UA3746-41	UA3746	93.84	59.2332	1.38069	17.1461	7.58876	0.166477	2.22127	6.13528	4.73245	1.34414	0.0667675	100	4.14796	NA	0	0
UA3746-18	UA3746	93.84	63.0564	1.25658	15.9246	6.01775	0.0699268	1.86857	4.8165	4.54149	2.39756	0.0654279	100	3.26455	95.3 ka	0	0
UA3746-50	UA3746	93.84	65.4715	0.87806	15.9476	4.943	0.19779	1.3444	3.36405	4.88867	2.80402	0.207714	100	3.27884	NA	0	0
UA3746-34	UA3746	93.84	69.2241	0.807373	14.0266	4.60954	0.115652	0.599408	2.41356	4.17831	3.90809	0.151627	100	1.98188	NA	7.24783e-07	0
UA3746-16	UA3746	93.84	70.6901	0.66698	14.6065	3.10964	0.0142786	0.623288	2.22565	4.41387	3.57317	0.0986283	100	2.92437	NA	0	0
UA3746-3	UA3746	93.84	72.6473	0.301476	14.1825	2.59987	0.0511101	0.268045	1.37518	4.48702	3.91924	0.217276	100	5.48448	NA	0.004	0
UA3746-42	UA3746	93.84	72.8102	0.288174	14.0266	2.55892	0.0537673	0.221917	1.39572	4.59932	3.87468	0.220448	100	4.66699	NA	0.003	0
UA3746-22	UA3746	93.84	73.4413	0.434692	13.9419	2.31381	0.0732199	0.323044	1.39108	4.13328	3.79217	0.200807	100	3.33776	NA	0.00810665	0
UA3746-17	UA3746	93.84	73.4603	0.450757	13.7883	2.22406	0.0399971	0.274088	1.4265	4.29244	3.88823	0.200535	100	6.31323	NA	0.00501668	0
UA3746-26	UA3746	93.84	73.5471	0.405603	13.7267	2.20377	0.0673956	0.3317	1.43154	4.27018	3.82867	0.241931	100	5.26832	NA	0.00321096	0
UA3746-15	UA3746	93.84	73.6792	0.388777	13.5443	2.25284	0.065278	0.317802	1.47684	4.19133	3.94959	0.173245	100	6.44471	NA	0.00272458	0
UA3746-19	UA3746	93.84	73.6915	0.453319	13.6221	2.21027	0.0877489	0.282615	1.36531	4.22209	3.89005	0.226281	100	5.0848	NA	0.00373847	0
UA3746-7	UA3746	93.84	73.708	0.457797	13.7089	2.25152	0.0248378	0.289499	1.43817	4.17003	3.79297	0.20438	100	5.12854	NA	0.00783121	0
UA3746-1	UA3746	93.84	73.7273	0.349468	13.7873	2.13128	0.0793368	0.295152	1.45865	4.23128	3.80469	0.17494	100	6.02725	NA	0.00107721	0
UA3746-49	UA3746	93.84	73.7457	0.394138	13.5997	2.17483	0.0851281	0.290658	1.37449	4.25287	3.91598	0.215005	100	5.7749	NA	0.00638838	0
UA3746-28	UA3746	93.84	73.7989	0.401532	13.6345	2.2729	0.010203	0.276755	1.43924	4.34751	3.64791	0.220183	100	4.78286	NA	0.00712028	0
UA3746-37	UA3746	93.84	73.8155	0.390779	13.4752	2.27601	0.00890168	0.283039	1.43113	4.29266	3.84736	0.231724	100	6.51207	NA	0.012216	0
UA3746-45	UA3746	93.84	73.8346	0.308871	13.9881	1.85064	0.0778194	0.271003	1.29188	4.19041	4.01085	0.227133	100	5.65466	NA	0.00600424	0
UA3746-33	UA3746	93.84	73.8691	0.340355	13.9565	1.84342	0.0882645	0.269894	1.33433	4.36262	3.77712	0.204693	100	5.65178	NA	0.00600533	0
UA3746-6	UA3746	93.84	73.8789	0.284504	13.7126	1.89455	0.053061	0.243046	1.35023	4.45305	3.93813	0.247854	100	6.01765	NA	0.00400431	0
UA3746-23	UA3746	93.84	73.9042	0.327747	13.8126	1.90971	0.012995	0.258285	1.3369	4.36421	3.88614	0.241716	100	3.83259	NA	0.00300942	0
UA3746-20	UA3746	93.84	73.9082	0.312682	13.9931	1.83113	0.0471396	0.262202	1.33096	4.21675	3.95354	0.186325	100	5.72055	NA	0.00300221	0
UA3746-4	UA3746	93.84	73.9289	0.330033	13.6658	1.86886	0.0650251	0.237193	1.39729	4.37867	3.94785	0.233099	100	6.45157	NA	0.00201867	0
UA3746-9	UA3746	93.84	73.9313	0.320906	14.2886	1.77407	0.0405714	0.250582	1.30206	4.15179	3.74429	0.252807	100	7.62452	NA	0.00900946	0
UA3746-32	UA3746	93.84	74.0104	0.254171	13.7728	1.84342	0.0645891	0.277987	1.34834	4.39036	3.83333	0.264311	100	5.44231	NA	0.00601252	0
UA3746-48	UA3746	93.84	74.0761	0.374073	13.5087	2.15226	0.088388	0.331738	1.47953	4.15714	3.70391	0.16548	100	6.08119	NA	0.0186389	0
UA3746-8	UA3746	93.84	74.0811	0.244918	13.6598	1.89411	0.00442715	0.253958	1.34868	4.35281	3.98668	0.223994	100	5.96659	NA	0.00602265	0
UA3746-10	UA3746	93.84	74.091	0.316298	13.8713	1.8358	0.0655563	0.24505	1.31631	4.3108	3.78983	0.204068	100	6.83576	NA	0.00401352	0
UA3746-40	UA3746	93.84	74.1987	0.295202	13.6323	1.87511	0.008529	0.260907	1.31216	4.31201	3.94709	0.204088	100	2.41534	NA	0.00604553	0
UA3746-35	UA3746	93.84	74.2243	0.369133	13.7619	1.79863	0	0.268325	1.25172	4.09466	4.05941	0.22212	100	7.96894	NA	0.0103208	0
UA3746-44	UA3746	93.84	74.2528	0.352194	13.8342	1.90423	0.0241553	0.257854	1.33611	4.06391	3.79187	0.23589	100	8.20632	NA	0.0213607	0
UA3746-30	UA3746	93.84	74.2826	0.448107	13.5669	2.08327	0.0243174	0.291322	1.3595	4.26913	3.54616	0.166123	100	2.95445	NA	0.00374951	0
UA3746-25	UA3746	93.84	74.3138	0.265644	13.7595	1.838	0.0486859	0.25842	1.31549	4.17045	3.89385	0.175674	100	5.86599	NA	0.00104931	0
UA3746-27	UA3746	93.84	74.4122	0.410781	13.4753	2.16477	0.0429225	0.266424	1.24136	3.83023	4.00607	0.19381	100	6.20529	NA	0.0445437	0
UA3746-43	UA3746	93.84	74.4235	0.276037	13.4989	1.88431	0.0310835	0.279892	1.30799	4.19307	3.96362	0.182789	100	6.32968	NA	0.00280941	0
UA3746-5	UA3746	93.84	74.4357	0.280537	13.9288	1.90157	0.0810869	0.220245	1.30611	3.70213	3.96318	0.233446	100	9.54645	NA	0.0681581	0
UA3746-38	UA3746	93.84	74.538	0.464609	12.2859	3.03218	0.10927	0.131885	1.02437	3.59696	4.6724	0.186547	100	6.17213	NA	0.00700961	0
UA3746-12	UA3746	93.84	74.607	0.334558	13.6587	1.96868	0.0534279	0.312235	1.68277	5.02621	2.22377	0.17134	100	3.84984	NA	0.002	0
UA3746-14	UA3746	93.84	74.6191	0.222103	13.6241	1.83142	0	0.236385	1.24105	4.16424	3.89304	0.217673	100	6.89932	NA	0.0157341	0
UA3746-2	UA3746	93.84	74.6407	0.317004	13.7906	1.92774	0.0513644	0.347313	1.54299	5.02866	2.21604	0.177492	100	5.85501	NA	0	0
UA3746-36	UA3746	93.84	75.1087	0.361481	13.2294	1.74426	0.0559621	0.262015	1.46243	3.76669	3.81986	0.244342	100	5.74329	NA	0.998642	1
UA3746-11	UA3746	93.84	75.1709	0.43975	12.5579	2.22613	0.0638801	0.192056	0.913173	3.35988	4.98058	0.123671	100	6.59526	NA	0	0
UA3746-46	UA3746	93.84	75.1868	0.364114	13.2075	1.62182	0.0696669	0.296077	1.47011	3.75586	3.80347	0.290005	100	6.52088	NA	0.999173	1
UA3746-39	UA3746	93.84	75.7956	0.310687	12.8035	1.82125	0.0647397	0.224258	1.20154	3.862	3.64667	0.348405	100	5.67454	NA	0.695284	0
UA3746-31	UA3746	93.84	75.8404	0.264472	13.7866	1.90351	0.0553312	0.280727	1.43515	2.21246	3.99813	0.28826	100	7.11575	NA	0.779292	0
UA3746-29	UA3746	93.84	76.1341	0.289316	14.0176	1.95448	0.0280361	0.295898	1.30106	2.04997	3.76254	0.215809	100	10.8148	NA	0.248524	0
UA3746-13	UA3746	93.84	76.364	0.299397	12.7771	0.75403	0.00146429	0.0252101	0.700639	2.60439	6.39305	0.104309	100	5.07365	NA	0	0
UA3746-47	UA3746	93.84	76.968	0.00380007	12.7924	0.76839	0.00295858	0.000821234	0.387324	3.45231	5.59431	0.0384871	100	6.23869	NA	0	0
UA3746-24	UA3746	93.84	77.8416	0.132008	12.6786	1.0351	0.0296786	0.144534	0.944243	4.08706	2.97754	0.167328	100	6.24894	NA	0	0
UA3747-22	UA3747	115	69.3286	0.444937	14.6138	4.29852	0.0999683	0.366665	2.05207	4.20896	4.42358	0.210271	100	6.25729	117.82 ka	0.00103264	0
UA3747-5	UA3747	115	70.589	0.59763	14.9204	3.13958	0.0895296	0.646146	2.11564	4.72273	3.05578	0.159495	100	3.09467	NA	0	0
UA3747-12	UA3747	115	70.8861	0.543593	14.7671	3.02741	0.126429	0.647014	2.35978	4.51032	3.00537	0.163859	100	6.35486	NA	0	0
UA3747-8	UA3747	115	72.3671	0.252453	14.3128	2.57281	0.124114	0.221347	1.43068	4.54574	3.99828	0.225729	100	5.67015	NA	0.003	0
UA3747-7	UA3747	115	72.4715	0.346603	14.2833	2.60562	0.0956798	0.218358	1.42249	4.51732	3.83833	0.259343	100	6.44735	NA	0.005	0
UA3747-25	UA3747	115	72.4888	0.338138	14.0944	2.61364	0.0817595	0.253834	1.42321	4.55215	3.95917	0.251681	100	5.33945	NA	0.003	0
UA3747-20	UA3747	115	72.6735	0.357785	14.042	2.64904	0.0770669	0.206072	1.35937	4.65957	3.80223	0.223874	100	3.2633	NA	0.001	0
UA3747-1	UA3747	115	72.7551	0.221736	14.2582	2.47149	0.0571983	0.255211	1.35037	4.68414	3.77263	0.224723	100	5.80486	NA	0.003	0
UA3747-24	UA3747	115	72.7559	0.254294	14.2685	2.56973	0.0452301	0.227754	1.42252	4.32895	3.93736	0.245082	100	5.27775	NA	0.002	0
UA3747-21	UA3747	115	72.7816	0.291963	14.3329	2.52141	0.0441703	0.216483	1.39707	4.61413	3.63329	0.215726	100	6.15645	NA	0.00100015	0
UA3747-6	UA3747	115	72.8874	0.300608	14.0854	2.55605	0.0711197	0.216305	1.27538	4.38158	4.07923	0.189904	100	5.11208	NA	0	0
UA3747-15	UA3747	115	72.9134	0.32885	14.1421	2.41491	0.0692808	0.22184	1.43187	4.35678	3.96057	0.207073	100	6.48498	NA	0.004	0
UA3747-11	UA3747	115	73.0874	0	18.7713	0.103385	0.0109707	0.584115	1.96869	1.92031	3.54388	0.0128311	100	11.7925	NA	0	0
UA3747-9	UA3747	115	73.0952	0.299285	14.0954	2.24837	0.0444839	0.300796	1.27774	4.76011	3.6335	0.316587	100	7.0586	NA	0.0200003	0
UA3747-16	UA3747	115	73.4847	0.398155	14.3555	2.0493	0.168387	0.388423	1.82651	5.36997	1.84506	0.147256	100	4.94844	NA	1.55091e-07	0
UA3747-23	UA3747	115	74.6155	0.311996	13.2941	1.80533	0.0543534	0.202095	1.16303	3.86228	4.52654	0.212833	100	5.83477	NA	0.0170413	0
UA3747-13	UA3747	115	74.9098	0.298685	13.3888	1.73295	0.0559315	0.271698	1.47935	3.74071	3.88215	0.309752	100	6.2746	NA	0.948941	1
UA3747-19	UA3747	115	75.3263	0.335773	12.9624	1.77684	0.11593	0.271233	1.46684	3.71587	3.7926	0.305092	100	7.00144	NA	0.997241	1
UA3747-10	UA3747	115	75.3339	0.359495	13.0288	1.71557	0.0345761	0.243693	1.49379	3.74428	3.82337	0.287343	100	8.22563	NA	0.999493	1
UA3747-14	UA3747	115	75.3824	0.319239	13.0475	1.79771	0.0422665	0.256605	1.45362	3.8182	3.70622	0.227727	100	5.31028	NA	0.999547	1
UA3747-4	UA3747	115	75.5017	0.289328	13.0515	1.75661	0.0888381	0.264386	1.47574	3.75353	3.6238	0.251249	100	6.65831	NA	0.999757	1
UA3747-18	UA3747	115	76.3513	0.0940271	13.2958	0.634395	0.0117015	0.0653104	0.891666	3.40865	5.20086	0.0597747	100	5.39645	NA	0	0
UA3747-3	UA3747	115	77.2129	0.144566	12.9827	1.12774	0.0673378	0.216086	1.26607	3.67706	3.14914	0.201976	100	7.5037	NA	4.87055e-06	0
UA3747-17	UA3747	115	77.4609	0.103189	12.8828	0.785879	0.0599763	0.10385	1.03327	3.4678	3.97258	0.167505	100	7.74517	NA	1.83349e-05	0
UA3747-2	UA3747	115	78.0489	0.156833	12.5775	1.01942	0.0310474	0.153303	0.922097	4.05368	2.93215	0.135773	100	6.3272	NA	0	0
OldCrow_004	OldCro	NA	75.2912	0.338788	13.0321	1.8179	0.0658824	0.269908	1.43719	3.81274	3.74884	0.23957	100	5.26759	NA	0.999542	1
OldCrow_004	OldCro	NA	75.6288	0.307343	12.9555	1.68976	0.0455687	0.304349	1.49602	3.77559	3.58369	0.275602	100	5.59532	NA	0.999777	1
OldCrow_004	OldCro	NA	75.5046	0.292358	12.9034	1.72895	0.0657192	0.28157	1.45057	3.85099	3.7293	0.248769	100	4.95466	NA	0.999675	1
OldCrow_004	OldCro	NA	75.769	0.245109	12.9794	1.66041	0.0625513	0.292116	1.49937	3.66559	3.61115	0.278163	100	4.52793	NA	0.999739	1
UA3747-42	UA3747	115	67.1282	0.775136	15.4186	5.07596	0.155133	0.874152	2.63289	5.07633	2.69838	0.213307	100	2.85977	117.82 ka	0	0
UA3747-49	UA3747	115	70.7246	0.565383	14.903	2.97915	0.113064	0.641292	2.28771	4.58174	3.05498	0.192365	100	3.09883	NA	0	0
UA3747-50	UA3747	115	70.7634	0.357487	14.7802	3.20618	0.0700553	0.326526	1.64301	4.1519	4.46244	0.308334	100	6.9978	NA	0.001	0
UA3747-32	UA3747	115	70.8211	0.399659	14.9973	3.26015	0.207831	0.384344	1.50936	5.48591	2.77216	0.209522	100	5.99719	NA	2.44963e-07	0
UA3747-38	UA3747	115	71.1996	0.573511	14.6834	2.93875	0.102433	0.589226	2.22299	4.59783	2.98787	0.134817	100	5.21982	NA	0	0
UA3747-26	UA3747	115	71.3935	0.554559	14.4163	2.87328	0.068329	0.558104	1.97237	4.35277	3.7264	0.109009	100	4.68622	NA	0	0
UA3747-45	UA3747	115	72.1178	0.430127	14.4031	2.86807	0.104921	0.468395	1.85985	4.23342	3.41886	0.123268	100	1.67185	NA	0	0
UA3747-34	UA3747	115	72.2702	0.462567	14.1651	3.03313	0.0380089	0.438907	1.79869	4.16857	3.55356	0.0920533	100	1.49402	NA	8.36849e-07	0
UA3747-28	UA3747	115	72.2829	0.327125	14.3476	2.59527	0.0883145	0.22323	1.47001	4.55827	3.9482	0.205581	100	5.80713	NA	0.004	0
UA3747-48	UA3747	115	72.376	0.25285	14.3023	2.578	0.102432	0.200219	1.49938	4.48002	4.04031	0.217499	100	3.82055	NA	0.003	0
UA3747-29	UA3747	115	72.541	0.249386	14.2685	2.46158	0.0437198	0.207098	1.44439	4.53402	4.10023	0.193781	100	4.82112	NA	0.001	0
UA3747-33	UA3747	115	72.605	0.240863	14.2642	2.47635	0.0638902	0.2103	1.35092	4.49631	4.10082	0.247029	100	4.44851	NA	0.001	0
UA3747-30	UA3747	115	72.623	0.269387	14.1137	2.53647	0.0397362	0.242698	1.41644	4.59969	3.97255	0.240569	100	5.73582	NA	0.005	0
UA3747-37	UA3747	115	72.7074	0.294697	14.2938	2.38754	0.0350471	0.228375	1.38939	4.57965	3.91618	0.217021	100	4.95364	NA	0.003	0
UA3747-35	UA3747	115	72.7552	0.32378	14.3133	2.31297	0.0861462	0.286267	1.3836	4.70895	3.61083	0.282688	100	6.57042	NA	0.0100003	0
UA3747-41	UA3747	115	72.8499	0.246978	14.0759	2.55975	0.0817355	0.237477	1.35877	4.56418	3.86122	0.212087	100	3.22443	NA	0.001	0
UA3747-31	UA3747	115	74.7344	0.338325	13.3359	1.84991	0.0792366	0.272631	1.46975	3.82829	3.87111	0.284691	100	5.34044	NA	0.916701	1
UA3747-39	UA3747	115	75.0911	0.367543	13.1135	2.06593	0.0836196	0.35045	1.69831	4.30953	2.75167	0.217409	100	5.30805	NA	0.00600769	0
UA3747-27	UA3747	115	75.1201	0.365798	13.1242	1.84029	0.00883423	0.27209	1.46746	3.86433	3.71224	0.290168	100	5.70764	NA	0.999399	1
UA3747-40	UA3747	115	77.3	0.258488	12.7572	1.17623	0.0209166	0.233238	1.26835	3.73959	3.08631	0.205989	100	6.87791	NA	1.38098e-05	0
UA3747-46	UA3747	115	77.3764	0.130767	12.9123	1.07802	0.0924243	0.219125	1.31276	3.77183	2.95751	0.192258	100	6.62302	NA	0.00100016	0
UA3747-36	UA3747	115	77.519	0.224326	12.892	1.14294	0.0135635	0.235757	1.29772	3.54233	2.97056	0.208995	100	7.68613	NA	7.29239e-06	0
UA3747-47	UA3747	115	78.6148	0.195066	12.4386	1.12889	0.0617587	0.167225	0.987768	3.86157	2.44077	0.133875	100	7.5758	NA	0	0
UA3747-43	UA3747	115	78.6504	0.110876	13.1499	0.836851	0.0653534	0.142833	0.964152	2.28975	3.62462	0.213409	100	10.5143	NA	0.00200064	0
UA3747-44	UA3747	115	79.1767	0.610646	11.8497	2.33521	0.0570809	0.190648	0.665987	2.24449	2.74603	0.159568	100	5.01028	NA	0	0
UA3748-23	UA3748	119.17	62.9708	1.22359	16.2524	7.33765	0.157055	1.54565	2.24157	4.13585	4.00933	0.16299	100	4.71132	122.26 ka	0	0
UA3748-13	UA3748	119.17	63.0252	1.00197	15.857	7.57421	0.275593	1.03878	3.85795	4.74613	2.50669	0.150276	100	3.11497	NA	0	0
UA3748-3	UA3748	119.17	72.3495	0.340898	14.2448	2.55871	0.083259	0.206752	1.38169	4.67119	3.96741	0.252772	100	5.01324	NA	0.001	0
UA3748-10	UA3748	119.17	72.3734	0.295712	14.2823	2.51723	0.07764	0.20688	1.41494	4.61542	4.03619	0.232789	100	5.30656	NA	0.001	0
UA3748-11	UA3748	119.17	72.3746	0.307862	14.3114	2.51538	0.051099	0.221911	1.39539	4.73628	3.93824	0.190852	100	4.97663	NA	0	0
UA3748-5	UA3748	119.17	72.4518	0.273153	14.2256	2.66685	0.0999399	0.232651	1.38425	4.43679	4.05159	0.22913	100	4.23544	NA	0.002	0
UA3748-2	UA3748	119.17	72.4938	0.276894	14.3015	2.49753	0.0921547	0.2319	1.40598	4.39192	4.12873	0.231789	100	6.64715	NA	0.002	0
UA3748-9	UA3748	119.17	72.5957	0.276491	14.2289	2.64724	0.0829663	0.21984	1.40645	4.54511	3.80219	0.251982	100	4.70104	NA	0.003	0
UA3748-8	UA3748	119.17	72.7035	0.271969	13.9823	2.74383	0.0583471	0.199945	1.39252	4.48799	3.98093	0.230783	100	4.91555	NA	0.002	0
UA3748-1	UA3748	119.17	72.8183	0.242274	14.1479	2.54145	0.0190876	0.210279	1.43739	4.51806	3.86941	0.253091	100	5.40472	NA	0.002	0
UA3748-24	UA3748	119.17	72.9471	0.341943	14.2032	2.68056	0.0705275	0.237578	1.34846	4.1779	3.82363	0.218519	100	7.85865	NA	0.00100127	0
UA3748-25	UA3748	119.17	75.4046	0.313848	13.1156	1.7138	0.0818429	0.273201	1.39743	3.69963	3.77321	0.293115	100	6.951	NA	0.999581	1
UA3748-21	UA3748	119.17	75.5094	0.342492	13.1988	1.68601	0.0558326	0.282676	1.4884	3.49948	3.72592	0.272574	100	8.1647	NA	0.999515	1
UA3748-22	UA3748	119.17	77.0785	0.211067	13.0066	1.13662	0.0278721	0.229499	1.25074	3.95549	2.93085	0.22301	100	5.46108	NA	0.00100068	0
UA3748-7	UA3748	119.17	77.0818	0.198299	13.0496	1.03375	0.080932	0.22511	1.35618	3.80488	3.01732	0.196549	100	7.17768	NA	2.82343e-07	0
UA3748-12	UA3748	119.17	77.2195	0.212986	12.8597	1.23365	0.093076	0.225544	1.25122	3.744	2.99661	0.21145	100	7.37888	NA	0.00101228	0
UA3748-15	UA3748	119.17	77.2394	0.100194	12.8746	0.81044	0.106413	0.129212	0.954478	3.92078	3.72753	0.17692	100	4.65319	NA	1.67641e-05	0
UA3748-16	UA3748	119.17	77.286	0.144113	12.8861	1.1264	0.0474643	0.241927	1.3062	3.79524	3.02968	0.176849	100	6.32536	NA	0	0
UA3748-17	UA3748	119.17	77.3174	0.170035	12.7357	1.15314	0.0862212	0.211222	1.3182	4.01855	2.84282	0.189478	100	6.57401	NA	0	0
UA3748-20	UA3748	119.17	77.34	0.194171	12.7209	1.1837	0.0839861	0.219878	1.32662	3.8639	2.89453	0.222416	100	7.47517	NA	3.25893e-06	0
UA3748-6	UA3748	119.17	77.3929	0.113687	12.9583	0.703924	0.109742	0.0863716	0.816918	3.76774	3.90915	0.182459	100	7.43259	NA	4.49308e-05	0
UA3748-19	UA3748	119.17	77.4213	0.102537	12.1724	1.33308	0.0660911	0.0241034	0.205104	4.21724	4.38611	0.0929516	100	5.51531	NA	0	0
UA3748-18	UA3748	119.17	77.4619	0.155092	12.8604	1.43637	0.0901787	0.265815	1.74413	3.93653	1.94281	0.137967	100	7.62338	NA	0	0
UA3748-14	UA3748	119.17	77.5086	0.171455	12.8485	1.1561	0.0267033	0.191986	1.29684	3.6915	2.91395	0.251008	100	6.31493	NA	0.00304209	0
UA3748-4	UA3748	119.17	77.8846	0.119128	12.6308	1.07684	0.0634874	0.168316	1.00213	4.02254	2.94147	0.117271	100	7.93926	NA	0	0
OldCrow_005	OldCro	NA	74.986	0.313321	13.2574	1.71394	0.0717362	0.298227	1.51784	3.78285	3.79014	0.346971	100	5.60279	NA	0.998659	1
OldCrow_005	OldCro	NA	75.2083	0.377523	13.0557	1.81911	0.0798493	0.269988	1.41294	3.75233	3.80201	0.286963	100	4.84079	NA	0.999056	1
OldCrow_005	OldCro	NA	75.6285	0.328597	12.8792	1.72326	0.0841151	0.236058	1.43089	3.75753	3.72596	0.265984	100	3.07685	NA	0.999767	1
OldCrow_005	OldCro	NA	76.2499	0.297758	13.181	1.74477	0.0633007	0.273739	1.51944	2.81854	3.63456	0.280221	100	6.08472	NA	0.84213	0
OldCrow_005	OldCro	NA	75.2651	0.363894	12.9378	1.88594	0.0434893	0.281034	1.49778	3.84663	3.6597	0.282266	100	4.67533	NA	0.998732	1
OldCrow_005	OldCro	NA	75.5501	0.233439	12.963	1.64322	0.0541022	0.305361	1.4665	3.79357	3.78962	0.25973	100	5.45491	NA	0.999597	1
OldCrow_001	OldCro	NA	75.0263	0.284332	13.3168	1.7554	0.0616979	0.287315	1.47907	3.76736	3.7998	0.286555	100	2.14251	NA	0.995413	1
OldCrow_002	OldCro	NA	75.2081	0.300658	13.0041	1.75278	0.0203716	0.291795	1.46856	3.82526	3.96061	0.21683	100	3.50787	NA	0.945301	1
OldCrow_003	OldCro	NA	75.6227	0.268033	13.0066	1.6385	0.0764227	0.290758	1.48567	3.53992	3.843	0.294879	100	6.27522	NA	0.999453	1
OldCrow_004	OldCro	NA	75.1403	0.357747	13.2596	1.73326	0.117882	0.292575	1.47165	3.64871	3.79412	0.237753	100	5.89448	NA	0.99726	1
OldCrow_005	OldCro	NA	75.1175	0.275534	12.9768	1.76406	0.0667963	0.284306	1.58036	3.76855	3.94936	0.279966	100	5.40791	NA	0.998396	1
OldCrow_006	OldCro	NA	75.5717	0.261002	13.1261	1.73849	0.0450385	0.296297	1.48801	3.60661	3.643	0.28894	100	6.44001	NA	0.999742	1
UA3748-23	UA3748	119.17	64.1336	0.981865	15.6396	6.76072	0.223323	1.03621	3.69168	4.98648	2.41175	0.173917	100	3.74705	NA	0	0
UA3748-17	UA3748	119.17	66.9388	0.758535	15.6078	4.7279	0.133078	0.90346	2.69283	5.03424	3.00416	0.257279	100	6.50187	NA	3.39546e-06	0
UA3748-8	UA3748	119.17	67.7368	1.14031	14.3849	4.74467	0.0246263	0.992003	3.24124	4.23214	3.45098	0.0674897	100	9.17433	NA	0	0
UA3748-4	UA3748	119.17	71.076	0.573729	14.5646	2.93652	0.0202611	0.562538	2.09937	4.40351	3.68043	0.107125	100	3.15907	NA	0	0
UA3748-14	UA3748	119.17	72.4104	0.28431	14.1978	2.70375	0.0854196	0.22548	1.42219	4.44102	4.06194	0.216554	100	6.42902	NA	0.004	0
UA3748-19	UA3748	119.17	72.6166	0.210385	14.0676	2.63508	0.0544434	0.234486	1.42451	4.66597	3.9138	0.228911	100	4.63305	NA	0.007	0
UA3748-18	UA3748	119.17	72.6793	0.265767	13.9606	2.55013	0.0995244	0.212606	1.35392	4.70838	3.99593	0.224436	100	4.13912	NA	0.004	0
UA3748-10	UA3748	119.17	72.6812	0.263099	14.3018	2.52477	0.0683791	0.192054	1.42407	4.45738	3.89633	0.246524	100	5.66858	NA	0.003	0
UA3748-11	UA3748	119.17	72.7091	0.253683	14.1526	2.64721	0.0829713	0.211895	1.40135	4.56127	3.81447	0.213685	100	3.69324	NA	0.001	0
UA3748-12	UA3748	119.17	72.7451	0.462137	14.7899	2.29907	0.118055	0.469191	2.12605	4.99561	1.87706	0.152024	100	4.42414	NA	0	0
UA3748-15	UA3748	119.17	72.7902	0.226051	14.2596	2.56634	0.0579788	0.208429	1.39245	4.45402	3.85155	0.249874	100	5.64997	NA	0.003	0
UA3748-9	UA3748	119.17	72.8972	0.308161	14.1785	2.5441	0.0339329	0.202281	1.36784	4.20858	4.0699	0.244616	100	4.95347	NA	0.003	0
UA3748-7	UA3748	119.17	72.9361	0.303467	14.1528	2.48596	0.0421383	0.2403	1.31841	4.44153	3.91675	0.209864	100	6.81644	NA	0.003	0
UA3748-21	UA3748	119.17	72.9798	0.263063	14.2288	2.53764	0.0471373	0.205842	1.35591	4.25092	3.94066	0.245509	100	7.65915	NA	0.003	0
UA3748-16	UA3748	119.17	73.0299	0.300459	13.9256	2.57357	0.0883252	0.19222	1.28281	4.55706	3.87306	0.228567	100	6.29399	NA	0.002	0
UA3748-25	UA3748	119.17	73.0415	0.300532	13.8458	2.6016	0.0391246	0.244569	1.41758	4.2223	4.08881	0.25609	100	6.61622	NA	0.00800384	0
UA3748-6	UA3748	119.17	73.121	0.325153	14.1271	2.43432	0.058758	0.22743	1.49731	4.02546	4.02081	0.210144	100	4.52537	NA	0.00700622	0
UA3748-20	UA3748	119.17	73.6623	0.274285	13.6018	2.47539	0.0925667	0.195144	1.3307	4.20446	3.90037	0.339714	100	7.49482	NA	0.00437591	0
UA3748-3	UA3748	119.17	75.2665	0.333177	13.2405	1.72715	0.0593648	0.275354	1.41931	3.56645	3.90708	0.264859	100	7.74157	NA	0.995587	1
UA3748-24	UA3748	119.17	76.7306	0.0964901	13.7808	0.481061	0.125383	0.100536	0.743314	3.75919	4.14689	0.0460973	100	7.83408	NA	0	0
UA3748-2	UA3748	119.17	77.2189	0.195604	12.7504	1.19641	0.116976	0.222774	1.32725	3.81034	3.00073	0.207541	100	6.26224	NA	5.54284e-06	0
UA3748-5	UA3748	119.17	77.4609	0.252808	12.5616	1.17609	0.120788	0.242777	1.34657	3.82634	2.86675	0.187872	100	6.89609	NA	7.6724e-07	0
UA3748-1	UA3748	119.17	77.7012	0.0627695	12.8981	0.765637	0.0600233	0.153798	1.09097	3.52713	3.60707	0.172121	100	8.60051	NA	0.00100395	0
UA3748-13	UA3748	119.17	77.8307	0.145236	12.5223	1.00787	0.0462258	0.167911	0.921298	4.16735	3.05418	0.176856	100	5.6913	NA	0	0
UA3748-22	UA3748	119.17	77.8311	0.203839	12.5059	1.05789	0.0848348	0.122584	0.944893	4.24825	2.89007	0.142882	100	7.06997	NA	0	0
UA3750-1	UA3750	141.57	71.0346	0.339376	14.6417	3.23875	0.113839	0.322621	1.53287	5.31456	3.26925	0.248574	100	5.02923	NA	0.001	0
UA3750-2	UA3750	141.57	72.4652	0.489534	14.2334	2.92373	0.132582	0.381539	1.79681	4.60203	2.8706	0.135051	100	6.71814	NA	0	0
UA3750-3	UA3750	141.57	77.402	0.156089	12.5452	1.27956	0.0587891	0.167204	1.31365	3.67202	3.30173	0.134212	100	6.45715	NA	4.35573e-06	0
UA3750-4	UA3750	141.57	69.6411	0.59178	15.2573	3.90525	0.190493	0.506102	1.77419	5.11616	2.84213	0.226736	100	2.71992	NA	7.1873e-07	0
UA3750-5	UA3750	141.57	77.7626	0.198043	12.4229	1.25334	0.0242639	0.170776	1.22541	3.77178	3.05769	0.146274	100	6.9358	NA	4.38201e-07	0
UA3750-6	UA3750	141.57	74.4472	0.375729	13.3409	2.48996	0.0695192	0.208877	1.31272	4.69059	2.91552	0.192328	100	6.77112	NA	0.00600145	0
UA3750-7	UA3750	141.57	76.8715	0.132197	13.3186	1.05393	0.0423692	0.255252	1.52388	3.8917	2.76824	0.183829	100	6.62075	NA	0	0
UA3750-8	UA3750	141.57	68.3789	0.598091	15.4513	4.44746	0.170438	0.638774	2.23251	5.59586	2.3715	0.148652	100	3.49509	NA	0	0
UA3750-9	UA3750	141.57	75.2003	0.299596	13.195	1.79425	0.0649187	0.257976	1.51201	3.72522	3.7294	0.286023	100	6.44609	NA	0.999672	1
UA3750-10	UA3750	141.57	74.245	0.314226	13.4794	1.88882	0.0346709	0.20539	0.995909	4.33265	4.30427	0.257768	100	6.30178	NA	3.30495e-05	0
UA3750-11	UA3750	141.57	75.3073	0.358518	13.093	1.79763	0.0648935	0.278085	1.44474	3.75584	3.69489	0.264897	100	6.33111	NA	0.999732	1
UA3750-12	UA3750	141.57	74.8453	0.305064	13.4231	1.83894	0.0485625	0.266686	1.48809	3.73489	3.84316	0.266276	100	6.80457	NA	0.952846	1
UA3750-13	UA3750	141.57	76.5387	0.117488	13.4046	1.08026	0.0843302	0.240117	1.3337	3.82489	3.21437	0.208706	100	7.58823	NA	2.9619e-06	0
UA3750-14	UA3750	141.57	74.9495	0.299625	13.2914	1.64654	0.0813827	0.297286	1.47765	3.782	3.93117	0.31415	100	6.05008	NA	0.983637	1
UA3750-15	UA3750	141.57	69.7951	0.467197	15.2117	3.78349	0.197217	0.385965	1.68073	5.72052	2.60168	0.201988	100	5.54537	NA	0	0
UA3750-16	UA3750	141.57	78.2762	0.18671	12.529	1.03874	0.0582429	0.177825	1.06063	4.07068	2.48107	0.155976	100	7.45822	NA	0	0
UA3750-17	UA3750	141.57	75.0773	0.342572	13.1811	1.79965	0.0286416	0.286486	1.57536	3.80731	3.70963	0.24793	100	6.05962	NA	0.997649	1
UA3750-18	UA3750	141.57	77.9098	0.168827	12.6659	1.06678	0.0841253	0.152427	1.04712	4.26134	2.48226	0.208641	100	7.2966	NA	0	0
UA3750-19	UA3750	141.57	75.1674	0.297379	13.2837	1.88792	0.0604413	0.25495	1.43346	3.71213	3.69275	0.270803	100	6.27112	NA	0.998515	1
UA3750-20	UA3750	141.57	74.6993	0.337764	13.4448	1.82063	0.0211123	0.255729	1.49604	3.96035	3.731	0.301155	100	6.14491	NA	0.780043	0
UA3750-21	UA3750	141.57	75.104	0.303609	13.1751	1.78978	0.0482281	0.267056	1.51712	3.66488	3.89293	0.306441	100	6.11083	NA	0.998048	1
UA3750-22	UA3750	141.57	75.0288	0.279765	13.4161	1.71548	0.0786788	0.271316	1.49297	3.72007	3.77837	0.282192	100	6.47296	NA	0.967021	1
UA3750-23	UA3750	141.57	75.0349	0.243736	13.3537	1.83076	0.0926428	0.244782	1.50524	3.76649	3.73831	0.244705	100	5.30616	NA	0.976793	1
UA3750-24	UA3750	141.57	75.0205	0.240219	13.2971	1.73199	0.0573244	0.285483	1.4897	3.82015	3.82332	0.302368	100	6.19006	NA	0.994286	1
UA3750-25	UA3750	141.57	74.9108	0.297532	13.2459	1.83599	0.0523319	0.243137	1.50359	4.01768	3.65243	0.310733	100	5.34455	NA	0.969161	1
UA3750-26	UA3750	141.57	72.5108	0.25871	14.9542	2.07738	0.0874323	0.569331	2.3563	4.12268	2.90793	0.200465	100	7.7846	NA	8.76787e-06	0
UA3750-27	UA3750	141.57	74.7993	0.299133	13.3347	2.46	0.0930258	0.185986	1.27118	4.64564	2.80499	0.136937	100	5.76914	NA	0	0
UA3750-28	UA3750	141.57	70.1548	0.544344	14.8415	4.00037	0.137827	0.408554	1.6226	5.19291	2.95139	0.188124	100	5.88914	NA	0	0
UA3750-29	UA3750	141.57	74.6398	0.324854	13.3851	2.56067	0.0508237	0.217127	1.33934	4.55685	2.807	0.152901	100	5.43184	NA	0	0
UA3750-30	UA3750	141.57	67.8183	0.56141	15.2222	4.67617	0.188083	0.662702	2.34703	6.1444	2.26932	0.142335	100	3.41374	NA	0	0
UA3750-31	UA3750	141.57	75.385	0.334296	13.1242	1.69671	0.0588289	0.301136	1.54292	3.59957	3.74721	0.271362	100	6.20083	NA	0.999681	1
UA3750-32	UA3750	141.57	75.2297	0.304449	13.2441	1.72502	0.0739079	0.246117	1.45635	3.8036	3.69202	0.290234	100	6.19405	NA	0.999459	1
UA3750-33	UA3750	141.57	75.0734	0.306756	13.1652	1.76073	0.0710253	0.277077	1.55177	3.75605	3.81467	0.288431	100	6.36441	NA	0.999389	1
UA3750-34	UA3750	141.57	72.6104	0.314048	14.4069	2.59606	0.107324	0.167106	1.01196	5.0072	3.56747	0.273198	100	6.53425	NA	0.003	0
UA3750-35	UA3750	141.57	75.2604	0.253581	13.2551	1.78917	0.0782836	0.237144	1.46661	3.62202	3.85451	0.236567	100	6.00198	NA	0.991268	1
UA3750-36	UA3750	141.57	75.523	0.305926	13.0362	1.83347	0.0580983	0.285495	1.46392	3.53617	3.74459	0.275102	100	7.42931	NA	0.999509	1
UA3750-37	UA3750	141.57	68.5638	0.575282	15.4433	4.58693	0.167495	0.639531	2.2987	5.20296	2.42425	0.126138	100	2.39601	NA	0	0
UA3750-38	UA3750	141.57	75.163	0.311879	13.1731	1.82864	0.0700968	0.249196	1.50364	3.80915	3.69114	0.258484	100	5.10832	NA	0.992671	1
UA3750-39	UA3750	141.57	73.9533	0.327238	13.7337	2.74649	0.0840258	0.210719	1.39724	4.55336	2.83492	0.205301	100	5.76233	NA	1.00584e-06	0
UA3750-40	UA3750	141.57	74.8329	0.301163	13.6579	1.79655	0.0378479	0.221855	1.42188	3.87109	3.65906	0.25798	100	6.51782	NA	0.650474	0
UA3750-41	UA3750	141.57	74.8855	0.340113	13.3927	1.74728	0.0761889	0.261997	1.5393	3.70694	3.82761	0.287307	100	5.26833	NA	0.971599	1
UA3750-42	UA3750	141.57	74.9625	0.339461	13.4251	1.79297	0.0467338	0.280447	1.50461	3.57904	3.87218	0.254537	100	6.12788	NA	0.936925	1
UA3750-43	UA3750	141.57	75.0203	0.409684	13.2823	1.73296	0.0450015	0.269381	1.57156	3.68514	3.76121	0.287397	100	5.661	NA	0.999339	1
UA3750-44	UA3750	141.57	78.199	0.182083	12.5492	1.12317	0.0379202	0.18184	1.08881	4.08047	2.43366	0.159958	100	6.56684	NA	0	0
UA3750-45	UA3750	141.57	77.0037	0.210291	13.2367	0.970319	0.093533	0.211192	1.34843	3.59612	3.18382	0.188417	100	7.60484	NA	1.38611e-06	0
UA3750-46	UA3750	141.57	75.0688	0.357496	13.3938	1.73292	0.0411696	0.276845	1.47372	3.57808	3.85738	0.283887	100	3.78589	NA	0.974327	1
UA3750-47	UA3750	141.57	74.9373	0.231279	13.3208	1.76392	0.0526622	0.283323	1.52904	3.89472	3.7749	0.273981	100	5.97242	NA	0.96647	1
UA3750-48	UA3750	141.57	75.0149	0.361402	13.2079	1.81325	0.0543522	0.274089	1.59766	3.80953	3.66862	0.256069	100	6.30731	NA	0.999692	1
UA3750-49	UA3750	141.57	99.2375	0	0.00453729	0.0824151	0.0295419	0	0	0.496443	0.142838	0.00856903	100	13.164	NA	0	0
UA3750-50	UA3750	141.57	75.118	0.303013	13.2862	1.68171	0.0655418	0.265373	1.51007	3.89477	3.67594	0.257456	100	7.17828	NA	0.996533	1
ID3506_007	ID3506	NA	74.8924	0.0323445	13.2881	1.60736	0.0730577	0.0422871	0.762131	3.87982	5.16707	0.329802	100	1.26294	NA	0.0150007	0
ID3506_008	ID3506	NA	74.6559	0.0541851	13.342	1.53762	0.0598485	0.0477158	0.769586	4.17681	5.09249	0.340604	100	0.731042	NA	0.0270021	0
ID3506_009	ID3506	NA	74.6104	0.0593906	13.3198	1.70255	0.0513432	0.0458102	0.771235	4.00226	5.19765	0.309477	100	0.84962	NA	0.0390002	0
ID3506_010	ID3506	NA	74.8549	0.0769947	13.3432	1.595	0.0683383	0.0429741	0.76504	4.03238	5.00455	0.279848	100	0.663309	NA	0.0290058	0
ID3506_011	ID3506	NA	75.0173	0.0817274	13.3623	1.54971	0.0329227	0.0328033	0.753608	3.77065	5.13401	0.34217	100	1.19594	NA	0.0220048	0
OldCrow_007	OldCro	NA	75.1398	0.298742	13.2476	1.67085	0.031244	0.32109	1.53224	3.71775	3.82072	0.283993	100	4.92574	NA	0.998951	1
OldCrow_008	OldCro	NA	75.5665	0.293437	12.966	1.72252	0.0526747	0.246768	1.51363	3.7098	3.7096	0.282949	100	5.99846	NA	0.999848	1
OldCrow_009	OldCro	NA	75.396	0.326763	13.045	1.67824	0.0612702	0.275533	1.49597	3.64964	3.84732	0.289642	100	5.35359	NA	0.99942	1
OldCrow_010	OldCro	NA	75.4288	0.260418	12.9814	1.69299	0.0904522	0.321895	1.53057	3.6795	3.81773	0.253482	100	6.18577	NA	0.999463	1
OldCrow_011	OldCro	NA	75.2781	0.344961	13.1338	1.73286	0.0456473	0.25903	1.52501	3.81506	3.66626	0.257367	100	3.94605	NA	0.999748	1
UA3753-1	UA3753	210.04	77.153	0	13.3108	0.751428	0.130746	0.102565	0.863767	3.77815	3.80966	0.129012	100	7.92901	NA	0	0
UA3753-2	UA3753	210.04	78.2378	0.154411	12.6411	1.09451	0.0439289	0.192034	1.03937	4.057	2.4188	0.156419	100	6.51492	NA	0	0
UA3753-3	UA3753	210.04	68.2005	0.566233	15.555	4.63526	0.186117	0.543182	2.14856	5.63978	2.40095	0.160696	100	5.47296	NA	0	0
UA3753-4	UA3753	210.04	68.4884	0.61799	15.3506	4.49034	0.183725	0.566179	2.10896	5.63855	2.44415	0.143588	100	4.98386	NA	0	0
UA3753-5	UA3753	210.04	76.8584	0.072838	13.5402	0.814603	0.118935	0.0886964	0.849039	3.88066	3.68108	0.123421	100	7.12809	NA	0	0
UA3753-6	UA3753	210.04	68.9995	1.03442	14.6149	4.30881	0.034642	0.969907	2.71387	3.84392	3.44729	0.042255	100	2.39017	NA	1.59323e-07	0
UA3753-7	UA3753	210.04	78.144	0.17385	12.7104	1.10455	0.0827545	0.211655	1.10136	4.02256	2.34219	0.137906	100	7.57237	NA	0	0
UA3753-8	UA3753	210.04	77.204	0.0559201	13.2577	0.727727	0.124669	0.0593612	0.892384	3.94516	3.63773	0.123068	100	6.83309	NA	0	0
UA3753-9	UA3753	210.04	68.8128	0.617526	15.0127	4.35786	0.179679	0.510533	2.05459	6.00996	2.31709	0.164141	100	3.58036	NA	0	0
UA3753-10	UA3753	210.04	68.6533	0.672213	15.2572	4.32829	0.177146	0.541258	2.11352	5.70625	2.42585	0.161478	100	4.56804	NA	0	0
UA3753-11	UA3753	210.04	77.1984	0.0439948	13.1548	0.820257	0.152262	0.0933826	0.897496	3.71738	3.82921	0.119928	100	7.88005	NA	0	0
UA3753-12	UA3753	210.04	70.2908	0.916515	14.2051	3.77075	0.0620917	0.686343	2.55592	3.43681	4.02824	0.0612647	100	2.29612	NA	7.91067e-07	0
UA3753-13	UA3753	210.04	72.3658	0.26862	13.7619	3.64229	0.134391	0.105584	1.46948	4.86071	3.19022	0.259605	100	6.53982	NA	1.76743e-06	0
UA3753-14	UA3753	210.04	64.1559	0.980387	15.0169	7.01312	0.239763	1.31855	4.17344	4.79562	2.19101	0.148876	100	2.75599	NA	0	0
UA3753-15	UA3753	210.04	76.9554	0.0926969	13.185	0.860468	0.133877	0.0987497	0.897936	3.93187	3.75141	0.11975	100	6.83719	NA	0	0
UA3753-16	UA3753	210.04	77.2646	0.279942	13.1498	1.677	0.0768552	0.251511	1.40797	3.84198	1.93975	0.142865	100	7.83833	NA	0.008	0
UA3753-17	UA3753	210.04	68.3899	0.60021	15.1252	4.68803	0.171691	0.542153	2.16737	5.66515	2.5207	0.167311	100	2.32965	NA	0	0
UA3753-18	UA3753	210.04	78.6636	0.151475	12.4776	1.13888	0.0276504	0.12822	0.999793	3.95467	2.34138	0.150747	100	7.69021	NA	0	0
UA3753-19	UA3753	210.04	78.2036	0.162025	12.4494	1.06167	0.0745892	0.157749	1.08438	4.231	2.42684	0.191954	100	6.85651	NA	0	0
UA3753-20	UA3753	210.04	68.596	0.713765	15.2536	4.34942	0.174794	0.59823	2.08647	5.45943	2.65722	0.143616	100	5.62623	NA	0	0
UA3753-21	UA3753	210.04	77.0245	0.0467774	13.25	0.739625	0.163198	0.0787139	0.863269	3.96191	3.78438	0.11333	100	7.04059	NA	0.001	0
UA3753-22	UA3753	210.04	74.5121	0.269657	13.2528	1.96349	0.00904593	0.179515	1.00553	4.25615	4.36581	0.240111	100	6.14568	NA	0.0101425	0
UA3753-23	UA3753	210.04	68.4918	0.68792	15.2748	4.47826	0.197173	0.551397	2.26713	5.61537	2.31755	0.153257	100	2.78148	NA	0	0
UA3753-24	UA3753	210.04	78.0991	0.113122	12.4365	0.804014	0.226167	0.0415169	0.659262	3.27086	4.16762	0.234876	100	7.24492	NA	0.00015081	0
UA3753-25	UA3753	210.04	76.8063	0.0545573	13.3162	0.701476	0.192631	0.0653607	0.853032	3.36895	4.55595	0.110301	100	6.55701	NA	0	0
UA3753-26	UA3753	210.04	68.2672	0.686419	15.3338	4.61192	0.188597	0.610141	2.3279	5.59122	2.27472	0.139524	100	4.37765	NA	0	0
UA3753-27	UA3753	210.04	76.7953	0.00818546	12.8541	1.13476	0.0427141	0.0185595	0.514537	3.01831	5.45933	0.199206	100	7.15247	NA	2.58249e-06	0
UA3753-28	UA3753	210.04	78.0182	0.172407	12.5287	1.06512	0.0486827	0.173379	1.07099	4.29542	2.48553	0.182839	100	6.84575	NA	0	0
UA3753-29	UA3753	210.04	74.4091	0.30765	13.2469	1.99588	0.0271752	0.185107	0.993551	4.29722	4.36064	0.228236	100	6.32986	NA	0.00204949	0
UA3753-30	UA3753	210.04	74.4017	0.308613	13.4189	2.00454	0.0622528	0.159259	1.03848	4.13849	4.2857	0.235133	100	6.87487	NA	0.00611041	0
UA3753-31	UA3753	210.04	77.0401	0.0372079	13.157	0.840725	0.13816	0.0816441	0.889525	3.74945	3.98316	0.107248	100	7.72388	NA	0	0
UA3753-32	UA3753	210.04	76.8974	0.141965	13.4207	0.716759	0.185464	0.106385	0.880239	3.97375	3.59243	0.109628	100	6.80098	NA	0.002	0
UA3753-33	UA3753	210.04	69.9148	0.584177	14.625	3.60605	0.0780709	0.442858	1.94327	4.60977	4.03258	0.211079	100	6.0687	NA	8.62824e-07	0
UA3753-34	UA3753	210.04	76.9979	0.0658738	13.2929	0.816147	0.136425	0.0863716	0.854704	3.82698	3.83357	0.115016	100	7.59001	NA	0	0
UA3753-35	UA3753	210.04	78.4608	0.195306	12.2579	1.07614	0.0363768	0.164111	1.06445	4.20443	2.4176	0.158733	100	6.5091	NA	0	0
UA3753-36	UA3753	210.04	68.4706	0.615832	15.2461	4.48787	0.200509	0.622004	2.15775	5.70053	2.39508	0.133928	100	6.56832	NA	0	0
UA3753-37	UA3753	210.04	76.1238	0.201762	13.6666	0.952251	0.127849	0.100514	1.17328	4.08358	3.42574	0.186945	100	6.92466	NA	5.00651e-06	0
UA3753-38	UA3753	210.04	77.1191	0.054342	13.1651	0.784029	0.179188	0.0595682	0.904096	3.9884	3.65356	0.11956	100	6.68173	NA	0	0
UA3753-39	UA3753	210.04	78.3052	0.200255	12.4087	1.13239	0.0677807	0.180992	1.07781	4.08059	2.41792	0.165865	100	7.996	NA	0	0
UA3753-40	UA3753	210.04	66.7264	1.1508	15.3203	4.65422	0.0546404	1.23807	3.31341	4.21456	3.26983	0.0746127	100	1.99923	NA	0	0
UA3753-41	UA3753	210.04	72.1792	0.477783	14.7714	2.83186	0.118017	0.480966	2.26471	4.72115	2.00247	0.196941	100	6.58765	NA	0	0
UA3753-42	UA3753	210.04	78.5871	0.214706	12.2215	1.16143	0.0735084	0.167865	1.09678	3.90426	2.4521	0.155852	100	7.42287	NA	0.001	0
UA3753-43	UA3753	210.04	68.6923	0.60592	15.3676	4.47029	0.150252	0.623085	2.12094	5.35286	2.49769	0.153763	100	7.11942	NA	0	0
UA3753-44	UA3753	210.04	76.9935	0.0948669	13.385	0.871144	0.179064	0.0909039	1.07958	3.96342	3.22731	0.148725	100	7.36706	NA	0	0
UA3753-45	UA3753	210.04	78.219	0.10196	12.4656	1.0906	0.0645156	0.173053	1.11385	4.11478	2.53743	0.154035	100	7.69051	NA	0	0
UA3753-46	UA3753	210.04	71.1698	0.457303	14.9936	2.8161	0.153287	0.631991	2.49797	5.10027	2.02515	0.199543	100	3.17539	NA	0	0
UA3753-47	UA3753	210.04	77.0728	0.0622752	13.3182	0.801702	0.140743	0.0723798	0.886434	3.80706	3.75484	0.108002	100	6.30949	NA	0.001	0
UA3753-48	UA3753	210.04	70.9622	0.550679	14.4296	2.98466	0.106608	0.348654	1.52516	4.40505	4.47803	0.270471	100	5.91896	NA	0	0
UA3753-49	UA3753	210.04	74.7382	0.306319	13.1502	1.77269	0.00751496	0.205364	1.20737	3.85309	4.56803	0.246903	100	5.81458	NA	0.0170699	0
UA3753-50	UA3753	210.04	67.9879	0.598092	15.4505	4.64134	0.163728	0.637626	2.19084	5.80321	2.40637	0.155594	100	3.58753	NA	0	0
UA3756-1	UA3756	256.58	75.0407	0.319742	13.143	1.70721	0.00749908	0.143898	1.11288	3.83772	4.51355	0.224473	100	5.61506	NA	0.024395	0
UA3756-2	UA3756	256.58	78.221	0.249825	12.3743	1.13129	0.0944947	0.204274	1.08397	4.11545	2.41485	0.142738	100	6.98946	NA	0	0
UA3756-3	UA3756	256.58	78.585	0.15905	12.3061	1.07864	0.0365531	0.156356	1.06372	4.11814	2.36686	0.167399	100	6.90243	NA	0	0
UA3756-4	UA3756	256.58	67.5965	0.549028	15.6846	4.81025	0.178311	0.595623	2.5827	5.20743	2.65894	0.176446	100	2.81284	NA	0	0
UA3756-5	UA3756	256.58	75.1383	0.0737071	13.9402	1.62277	0.193862	0.286675	1.49311	3.87733	3.26639	0.139114	100	9.43203	NA	0.00201546	0
UA3756-6	UA3756	256.58	72.3674	0.14099	16.0184	2.21389	0.0815058	0.363349	1.59753	4.2341	2.87503	0.139109	100	8.00527	NA	0	0
UA3756-7	UA3756	256.58	77.5692	0.18751	12.5202	1.25666	0.0288589	0.161081	1.31548	3.70701	3.1493	0.135276	100	6.67	NA	5.87498e-07	0
UA3756-8	UA3756	256.58	77.7833	0.192258	12.5305	1.23255	0.022892	0.171576	1.28631	3.47155	3.22114	0.113456	100	7.10281	NA	7.12936e-07	0
UA3756-9	UA3756	256.58	78.0118	0.230414	12.1201	1.21107	0.056168	0.178931	1.25897	3.31044	3.47818	0.185934	100	9.12089	NA	0.00138612	0
UA3756-10	UA3756	256.58	78.1871	0.110007	12.3281	1.03738	0.0528117	0.150096	1.14822	3.52763	3.34514	0.146617	100	6.0056	NA	4.59201e-06	0
UA3756-11	UA3756	256.58	72.7458	0.353283	14.0644	2.65905	0.0848133	0.232221	1.02251	3.87216	4.7715	0.250884	100	6.67026	NA	0.001	0
UA3756-12	UA3756	256.58	70.1359	0.388744	14.9141	4.4816	0.198229	0.322463	2.01359	4.41662	2.95973	0.218271	100	7.52335	NA	0	0
UA3756-13	UA3756	256.58	71.3284	0.435821	14.6258	3.27964	0.153596	0.282701	1.4527	4.9589	3.28277	0.25795	100	7.14736	NA	7.45211e-07	0
UA3756-14	UA3756	256.58	73.023	0.328273	13.6497	2.69339	0.0468647	0.25006	1.37401	3.68004	4.76257	0.248091	100	6.49456	NA	0.0250004	0
UA3756-15	UA3756	256.58	78.4247	0.194437	12.6192	1.05235	0.0524476	0.157789	1.10775	3.87718	2.38459	0.167247	100	8.01097	NA	0	0
UA3756-16	UA3756	256.58	74.4071	0.228835	13.2311	1.91194	0	0.214376	1.03941	4.29388	4.48649	0.241209	100	5.74682	NA	0.00905577	0
UA3756-17	UA3756	256.58	78.6397	0.225697	12.2085	1.10877	0.107883	0.182271	1.09028	3.80832	2.48965	0.179272	100	6.67758	NA	0	0
UA3756-18	UA3756	256.58	74.7794	0.31993	13.2687	1.71262	0.0568639	0.203171	1.12502	3.73019	4.61035	0.250227	100	5.40749	NA	0.0090184	0
UA3756-19	UA3756	256.58	71.3671	0.572314	14.8071	2.73431	0.173722	0.593343	2.23668	4.65344	2.75654	0.136326	100	5.64372	NA	0	0
UA3756-20	UA3756	256.58	74.3647	0.281969	13.6882	1.93616	0.0725123	0.216255	1.06581	3.78595	4.41763	0.220597	100	6.33307	NA	0.00502703	0
UA3756-21	UA3756	256.58	74.927	0.305784	13.2321	1.74669	0.0398946	0.221232	1.26808	3.68066	4.41575	0.210287	100	4.20005	NA	0.0487522	0
UA3756-22	UA3756	256.58	75.2919	0.126872	14.4414	0.948776	0.149278	0.155205	1.43177	3.87341	3.38146	0.258148	100	16.4718	NA	0.0220126	0
UA3756-23	UA3756	256.58	68.698	0.796859	15.2363	4.21358	0.158919	0.881415	2.76212	4.74087	2.41428	0.126083	100	2.39895	NA	0	0
UA3756-24	UA3756	256.58	78.5246	0.2099	12.4045	1.09633	0.0639656	0.207102	1.07347	3.90275	2.38947	0.16513	100	6.93428	NA	0	0
UA3756-25	UA3756	256.58	78.5811	0.237262	12.3128	1.07519	0.039373	0.143443	1.09172	4.06756	2.34091	0.142978	100	6.40292	NA	0	0
ID3506_012	ID3506	NA	75.0492	0.0593156	13.1043	1.58204	0.0570811	0.0250966	0.763814	3.95106	5.18291	0.290872	100	0.827091	NA	0.0100012	0
ID3506_013	ID3506	NA	74.7099	0.057824	13.3364	1.6045	0.0809243	0.0704429	0.736278	4.07816	5.0531	0.351894	100	0.347606	NA	0.0280009	0
ID3506_014	ID3506	NA	74.7509	0.10964	13.3265	1.57875	0.0513073	0.0219713	0.714103	4.08869	5.12261	0.304101	100	0.715867	NA	0.0210013	0
ID3506_015	ID3506	NA	74.5557	0.0594604	13.2721	1.61553	0.0596603	0.0453552	0.779207	4.195	5.14138	0.357178	100	0.406057	NA	0.0120005	0
ID3506_016	ID3506	NA	74.6933	0.0638674	13.1735	1.64703	0.0240692	0.0463841	0.756148	4.02254	5.31893	0.32791	100	0.0757771	NA	0.041	0
OldCrow_012	OldCro	NA	75.2609	0.322495	13.0872	1.81204	0.0609941	0.285005	1.5219	3.79875	3.64773	0.262218	100	4.87117	NA	0.999787	1
OldCrow_013	OldCro	NA	75.8393	0.305177	13.1167	1.70953	0.057354	0.283778	1.53758	3.2806	3.63572	0.302473	100	3.73288	NA	0.994045	1
OldCrow_014	OldCro	NA	75.4404	0.385095	12.8532	1.66539	0.0831792	0.286237	1.50537	3.76417	3.79319	0.288974	100	4.71053	NA	0.999585	1
OldCrow_015	OldCro	NA	75.3441	0.31364	13.1153	1.72581	0.0730848	0.250529	1.51471	3.64401	3.81609	0.261731	100	5.11704	NA	0.999486	1
OldCrow_016	OldCro	NA	75.5595	0.308309	13.1988	1.6533	0.0831823	0.238518	1.43202	3.73527	3.59104	0.258393	100	3.01179	NA	0.998621	1
UA3756-26	UA3756	256.58	61.2722	1.38323	15.8055	7.5803	0.195355	1.93452	4.83093	4.74774	2.11959	0.168705	100	2.32666	NA	0	0
UA3756-27	UA3756	256.58	64.2235	1.08299	15.3889	6.83718	0.134733	1.65617	4.6372	4.41832	1.50949	0.144119	100	2.99871	NA	0	0
UA3756-28	UA3756	256.58	74.2748	0.283781	13.3892	1.99699	0.0673376	0.126259	0.982592	4.1942	4.48428	0.259099	100	5.48069	NA	0.00800674	0
UA3756-29	UA3756	256.58	70.1971	0.462871	15.1888	3.77983	0.0753529	0.394145	1.25017	5.20135	3.21426	0.304914	100	4.52921	NA	0.001	0
UA3756-30	UA3756	256.58	78.336	0.170668	12.35	1.04507	0.0756028	0.183212	1.08355	4.14741	2.44188	0.215194	100	6.23761	NA	0	0
UA3756-31	UA3756	256.58	78.2681	0.21597	12.3157	1.09874	0.0556433	0.198283	1.06832	4.18639	2.46409	0.166338	100	5.75506	NA	0	0
UA3756-32	UA3756	256.58	69.7189	0.566803	15.2087	4.16186	0.150523	0.47373	1.92273	4.82173	2.81175	0.21086	100	8.19649	NA	0	0
UA3756-33	UA3756	256.58	69.8773	0.517331	15.0869	4.09231	0.223909	0.399258	1.85053	4.86494	2.90017	0.242059	100	8.05584	NA	4.91584e-07	0
UA3756-34	UA3756	256.58	74.7785	0.327497	13.3102	1.6127	0.0309732	0.183694	1.12983	3.88527	4.54782	0.249902	100	4.03314	NA	0.0181561	0
UA3756-35	UA3756	256.58	73.662	0.339588	14.3174	2.04012	0.107804	0.455676	2.00152	4.32047	2.58084	0.225491	100	6.82987	NA	1.3496e-05	0
UA3756-36	UA3756	256.58	78.4314	0.144334	12.8196	0.858947	0.147178	0.244931	1.14406	3.47759	2.63656	0.123201	100	7.49626	NA	0.001	0
UA3756-37	UA3756	256.58	68.3132	0.638441	15.4379	4.58827	0.168508	0.699641	2.48502	4.75179	2.76461	0.197051	100	2.9965	NA	0	0
UA3756-38	UA3756	256.58	74.6088	0.326716	13.692	1.73252	0.0349233	0.263529	1.3172	4.25789	3.62217	0.18629	100	6.80156	NA	0.0160787	0
UA3756-39	UA3756	256.58	69.0796	0.587838	15.3028	4.23457	0.1734	0.525973	2.05752	5.01488	2.88004	0.185264	100	7.33038	NA	0	0
UA3756-40	UA3756	256.58	70.1649	0.435283	15.4975	2.66029	0.116353	0.270253	1.37736	6.22966	3.0768	0.221447	100	13.839	NA	0	0
UA3756-41	UA3756	256.58	76.7231	0.0540338	13.6228	0.723037	0.146246	0.110667	1.16108	3.64121	3.72683	0.117738	100	7.96878	NA	0	0
UA3756-42	UA3756	256.58	78.3606	0.134573	12.4625	1.09795	0.0978592	0.197134	1.03845	3.97197	2.51663	0.157869	100	7.37301	NA	0	0
UA3756-43	UA3756	256.58	78.0533	0.219067	12.5793	1.11725	0.0287373	0.211473	1.10756	4.17232	2.40122	0.14165	100	6.38989	NA	0	0
UA3756-44	UA3756	256.58	76.2323	0.149032	13.6424	1.21406	0.0954464	0.330469	1.89442	3.66272	2.6669	0.144938	100	6.62713	NA	0	0
UA3756-45	UA3756	256.58	75.1356	0.256554	13.2351	1.76829	0.00452133	0.231192	1.12012	3.7348	4.33645	0.228999	100	6.28871	NA	0.0436922	0
UA3756-46	UA3756	256.58	68.9725	0.512962	15.036	4.22428	0.20039	0.509807	2.07362	5.46468	2.85046	0.200692	100	3.8671	NA	1.58421e-06	0
UA3756-47	UA3756	256.58	64.4026	0.892425	15.71	6.10887	0.158526	1.44151	4.26905	4.62878	2.25078	0.177532	100	3.54908	NA	0	0
UA3756-48	UA3756	256.58	78.7685	0.184564	12.2647	1.09258	0.0708775	0.164799	1.08977	3.73217	2.50279	0.167036	100	8.22903	NA	0	0
UA3756-49	UA3756	256.58	73.5551	0.292252	13.264	2.64477	0.0510614	0.228546	1.29765	3.8586	4.60158	0.266408	100	6.13257	NA	0.009004	0
UA3756-50	UA3756	256.58	74.4481	0.298665	13.2721	2.00096	0.0641281	0.204163	0.935191	4.14629	4.43792	0.248429	100	5.4049	NA	0.00201637	0
UA3756-51	UA3756	256.58	78.1453	0.229214	12.4775	1.11423	0.0316273	0.187054	1.10317	3.93936	2.60456	0.216804	100	11.1748	NA	0	0
UA3756-52	UA3756	256.58	70.8396	0.404443	15.0394	3.20177	0.206047	0.336342	1.52041	5.1418	3.13328	0.228636	100	6.99027	NA	6.14044e-07	0
UA3757-1	UA3757	260.19	65.041	0.797302	15.3748	5.53826	0.0874708	1.59002	5.18762	4.25681	2.01399	0.145578	100	2.68637	NA	0	0
UA3757-2	UA3757	260.19	68.9059	0.529231	15.3287	4.06549	0.143844	0.429484	1.91391	5.69675	2.81138	0.226537	100	6.66962	NA	1.63813e-06	0
UA3757-3	UA3757	260.19	70.4937	0.37791	15.5193	2.64353	0.117259	0.274357	1.68045	4.74693	3.93744	0.269961	100	6.73382	NA	0.005	0
UA3757-4	UA3757	260.19	68.6034	0.959331	14.7924	4.00904	0.0913892	0.993308	2.68845	4.04019	3.76239	0.0776176	100	4.9133	NA	0	0
UA3757-5	UA3757	260.19	74.1583	0.312353	13.5646	1.8673	0.0651987	0.182216	1.04028	4.40171	4.24903	0.205547	100	5.00424	NA	0.00100603	0
UA3757-6	UA3757	260.19	66.5714	0.96394	15.8118	4.37391	0.0666066	1.25184	3.73493	4.95996	2.10343	0.209437	100	7.27201	NA	0	0
UA3757-7	UA3757	260.19	75.6053	0.217649	12.9526	1.844	0.043772	0.177463	1.1764	4.14899	3.613	0.285115	100	6.52478	NA	0.612256	0
UA3757-8	UA3757	260.19	71.4016	0.281353	14.5076	3.16312	0.0627241	0.204114	1.43145	5.20299	3.57883	0.214857	100	5.69814	NA	0.004	0
UA3757-9	UA3757	260.19	68.6244	0.523216	15.3745	4.24853	0.155162	0.532139	2.0622	5.24733	2.97212	0.336388	100	17.4919	NA	3.26506e-06	0
UA3757-10	UA3757	260.19	74.1749	0.314167	13.454	2.01867	0.0497836	0.168746	1.04563	4.19464	4.38063	0.256795	100	6.37285	NA	0.00301411	0
UA3757-11	UA3757	260.19	73.93	0.344752	13.6663	1.94053	0.0765226	0.180687	1.0841	4.25018	4.31043	0.279616	100	5.83692	NA	0.00200324	0
UA3757-12	UA3757	260.19	74.1871	0.193743	13.9029	0.928094	0.0344226	0.134145	0.69499	3.52841	6.36913	0.0350341	100	5.47493	NA	0	0
UA3757-13	UA3757	260.19	75.3415	0.0969364	13.5081	1.47355	0.0506329	0.0198632	0.765995	3.86748	4.83534	0.052467	100	5.02024	NA	0.001	0
UA3757-14	UA3757	260.19	61.3525	1.38368	15.6953	7.24822	0.14431	1.94105	4.92838	5.0465	2.13202	0.165387	100	4.79227	NA	0	0
UA3757-15	UA3757	260.19	74.2062	0.288127	13.5219	1.94291	0.0194625	0.207663	1.05344	4.08356	4.51943	0.203181	100	5.64403	NA	0.00201086	0
UA3757-16	UA3757	260.19	69.6377	0.537069	15.0037	4.10037	0.178336	0.483398	1.96286	4.7352	3.20081	0.207301	100	6.8887	NA	1.17659e-06	0
UA3757-17	UA3757	260.19	74.193	0.328925	13.2961	2.0009	0.0537231	0.160201	1.01162	4.35361	4.41712	0.238684	100	5.47092	NA	0.00800834	0
UA3757-18	UA3757	260.19	75.8181	0.199329	12.9685	1.28725	0.072266	0.213737	1.14105	3.53864	4.47809	0.365662	100	6.2588	NA	0.0503668	0
UA3757-19	UA3757	260.19	76.7232	0.137024	13.2348	0.983893	0.102632	0.203595	1.64503	3.4689	3.40772	0.120291	100	5.10643	NA	0.00200016	0
UA3757-20	UA3757	260.19	71.6593	0.374385	14.6031	3.34346	0.0871318	0.350136	1.96752	5.19903	2.2609	0.200081	100	8.0738	NA	0	0
UA3757-21	UA3757	260.19	73.9605	0.274402	13.6052	1.93594	0.0738079	0.214557	1.0729	4.28537	4.39263	0.238707	100	6.62376	NA	0.00200268	0
UA3757-22	UA3757	260.19	77.2972	0.0396329	13.0036	0.850034	0.029685	0.0783183	0.845149	3.70987	4.0824	0.0827208	100	9.87034	NA	0	0
UA3757-23	UA3757	260.19	70.4849	0.283351	15.4751	2.68225	0.122802	0.326027	1.81644	4.70531	3.88167	0.28669	100	7.54889	NA	0.007	0
UA3757-24	UA3757	260.19	76.0728	0.357134	12.8335	1.70632	0.0679367	0.361072	1.80149	3.48263	3.19426	0.158673	100	7.00903	NA	0.0030165	0
UA3757-25	UA3757	260.19	66.3699	0.818898	15.6345	4.84885	0.150879	1.1572	3.43908	4.72414	2.59007	0.34424	100	14.0164	NA	0	0
UA3757-26	UA3757	260.19	77.7396	0.177275	12.4589	1.21668	0.0227473	0.219093	1.32065	4.17377	2.51562	0.201152	100	7.50544	NA	0	0
UA3757-27	UA3757	260.19	74.242	0.261529	13.4411	1.99869	0.047861	0.19856	1.0451	4.13415	4.46118	0.219472	100	6.46657	NA	0.00501399	0
UA3757-28	UA3757	260.19	74.2748	0.262698	13.4218	1.99983	0.0286062	0.167434	1.00419	4.21587	4.44261	0.23531	100	7.15995	NA	0.00702306	0
UA3757-29	UA3757	260.19	69.9408	0.44372	14.8883	3.81093	0.180886	0.380657	1.89258	5.50569	2.79158	0.212939	100	6.84502	NA	6.72332e-07	0
UA3757-30	UA3757	260.19	73.7792	0.38946	13.4765	2.2253	0.0480164	0.259745	1.09239	4.16208	4.37273	0.251101	100	9.89749	NA	0.00100198	0
UA3757-31	UA3757	260.19	69.2553	0.530524	15.2499	3.98123	0.216081	0.427779	1.66472	5.66708	2.83827	0.218426	100	5.99017	NA	2.20099e-06	0
UA3757-32	UA3757	260.19	74.2651	0.24938	13.5108	1.99371	0.0530724	0.173779	1.00895	4.09877	4.49309	0.198043	100	7.88999	NA	1.04995e-05	0
UA3757-33	UA3757	260.19	70.454	0.352725	15.6028	2.6188	0.121556	0.350849	1.74222	4.81923	3.71958	0.28186	100	8.16714	NA	0.001	0
UA3757-34	UA3757	260.19	64.6801	0.978332	14.6737	6.64328	0.172173	1.25651	3.8533	4.24236	3.36667	0.172497	100	4.43085	NA	0	0
UA3757-35	UA3757	260.19	74.0504	0.287681	13.4129	2.07212	0.0512096	0.200476	1.01143	4.22548	4.48215	0.266287	100	7.18545	NA	0.0030026	0
UA3757-36	UA3757	260.19	75.1398	0.328444	13.464	1.99831	0.0989799	0.383397	2.14797	4.07032	2.25251	0.150144	100	8.12685	NA	0	0
UA3757-37	UA3757	260.19	76.1797	0.240867	12.5066	1.39481	0.0765427	0.172383	1.17289	3.24383	4.68772	0.419369	100	6.75006	NA	0.0646807	0
UA3757-38	UA3757	260.19	74.0452	0.314144	13.4819	1.99438	0.0349594	0.181684	0.976012	4.16118	4.62854	0.235225	100	8.02751	NA	0.00200104	0
UA3757-39	UA3757	260.19	62.3905	1.10318	16.1177	6.72165	0.160574	1.67817	4.69368	4.93823	2.07774	0.153156	100	4.04035	NA	0	0
UA3757-40	UA3757	260.19	68.8265	0.56262	15.2299	4.28834	0.162688	0.535587	2.07539	5.51169	2.61638	0.246557	100	7.5722	NA	0.001	0
UA3757-41	UA3757	260.19	76.8746	0.212287	12.4683	1.5381	0	0.111361	0.850566	3.9883	3.85642	0.129259	100	6.09925	NA	0.00301412	0
UA3757-42	UA3757	260.19	74.3031	0.320756	13.2874	2.12383	0.0581973	0.199225	0.999952	4.11496	4.41706	0.226654	100	6.42869	NA	0.00801135	0
UA3757-43	UA3757	260.19	76.2886	0.0978606	13.6056	0.804783	0.167198	0.096314	1.16325	3.49501	4.18092	0.129646	100	9.6756	NA	3.2294e-07	0
UA3757-44	UA3757	260.19	61.9339	1.31609	16.0833	6.2144	0.0904645	2.24818	5.23117	4.13521	2.70031	0.0606666	100	3.43614	NA	0	0
UA3757-45	UA3757	260.19	64.2847	1.10568	14.6811	6.88204	0.154023	1.9324	5.08423	4.33077	1.34816	0.254236	100	16.3431	NA	0	0
UA3757-46	UA3757	260.19	74.3178	0.137739	15.2797	1.02968	0.0925272	0.288532	1.51478	4.17658	2.98668	0.227283	100	20.0192	NA	0	0
UA3757-47	UA3757	260.19	74.3536	0.25505	13.3699	2.00821	0.0602723	0.215595	1.03316	4.20523	4.32	0.23113	100	7.45658	NA	0.0040541	0
UA3757-48	UA3757	260.19	75.8375	0.192407	13.3902	1.48308	0.0548468	0.315473	1.68278	4.03702	2.83234	0.22529	100	8.35204	NA	4.17311e-05	0
UA3757-49	UA3757	260.19	74.1374	0.290238	13.3712	2.152	0.0749401	0.200874	1.06208	4.1806	4.34845	0.235356	100	6.93362	NA	0.0040125	0
UA3757-50	UA3757	260.19	69.0684	0.483043	15.2381	3.96277	0.135113	0.470769	2.15995	5.33813	2.9783	0.213619	100	7.28346	NA	2.39392e-06	0
UA3757-51	UA3757	260.19	74.1241	0.285558	13.439	2.21899	0.0526767	0.166564	1.0261	4.11783	4.37425	0.251804	100	7.15067	NA	0.00300917	0
ID3506_017	ID3506	NA	74.7174	0.0916115	13.0663	1.64886	0.0838858	0.0405387	0.724521	4.14566	5.25353	0.293905	100	1.47201	NA	0.032	0
ID3506_018	ID3506	NA	74.521	0.0857641	13.1561	1.65084	0.0639092	0.0383005	0.764783	4.22737	5.25726	0.302908	100	1.29903	NA	0.024	0
ID3506_019	ID3506	NA	74.3664	0.133652	13.0945	1.67883	0.105095	0.0154709	0.729151	4.39586	5.24811	0.300806	100	1.24712	NA	0.019	0
ID3506_020	ID3506	NA	74.8454	0.0808407	13.0892	1.58957	0.082098	0.0424999	0.766197	4.2106	5.05172	0.312428	100	0.820974	NA	0.0310019	0
ID3506_021	ID3506	NA	74.5582	0.0960372	13.3111	1.5234	0.102244	0.0445593	0.759099	4.18351	5.14874	0.352896	100	1.07789	NA	0.0170002	0
ID3506_022	ID3506	NA	74.6524	0.0501025	13.3017	1.71036	0.0855154	0.0386399	0.755991	3.90717	5.23523	0.339555	100	1.36629	NA	0.034	0
OldCrow_017	OldCro	NA	75.3722	0.375662	12.8939	1.77839	0.0512522	0.28223	1.46062	3.90047	3.65708	0.294666	100	3.88504	NA	0.999704	1
OldCrow_018	OldCro	NA	75.3305	0.344712	12.8379	1.67476	0.0639343	0.283731	1.55473	3.83272	3.86058	0.279436	100	3.06292	NA	0.999485	1
OldCrow_019	OldCro	NA	75.272	0.301245	13.0503	1.78827	0.0253691	0.258779	1.48992	3.7955	3.81248	0.266258	100	5.57808	NA	0.999478	1
OldCrow_020	OldCro	NA	75.2875	0.279919	13.1641	1.69146	0.0374446	0.256099	1.49383	3.84498	3.72742	0.280478	100	5.84214	NA	0.999388	1
OldCrow_021	OldCro	NA	75.3845	0.289971	13.1586	1.69324	0.0602608	0.291174	1.48193	3.74453	3.69445	0.260024	100	6.3322	NA	0.999707	1
OldCrow_022	OldCro	NA	75.3823	0.270162	12.9387	1.74222	0.0841237	0.252298	1.48153	3.75821	3.87352	0.280134	100	6.00509	NA	0.99942	1
OldCrow_001	OldCro	NA	75.405	0.284732	12.8999	1.74038	0.0439112	0.23298	1.52391	3.79657	3.86342	0.270128	100	2.0273	NA	0.997556	1
OldCrow_002	OldCro	NA	75.4773	0.289565	13.0342	1.6579	0.0587275	0.252366	1.48108	3.87352	3.68572	0.244984	100	0.7348	NA	0.999583	1
OldCrow_003	OldCro	NA	75.4127	0.346595	13.0578	1.62241	0.0574709	0.270711	1.49702	3.77187	3.74049	0.287926	100	3.3859	NA	0.999767	1
OldCrow_004	OldCro	NA	75.6102	0.256137	12.9507	1.68971	0.0405143	0.247815	1.52385	3.68482	3.80087	0.2524	100	4.0562	NA	0.999641	1
OldCrow_005	OldCro	NA	75.4079	0.318725	13.0751	1.697	0.0679347	0.275342	1.48067	3.63061	3.85055	0.253177	100	3.9401	NA	0.999173	1
OldCrow_006	OldCro	NA	75.3445	0.358255	13.2657	1.62025	0.0595349	0.261069	1.50977	3.64157	3.75653	0.236052	100	4.3822	NA	0.999306	1
OldCrow_007	OldCro	NA	75.18	0.335221	13.191	1.73752	0.0451528	0.248116	1.48337	3.69809	3.86144	0.28429	100	4.6947	NA	0.996613	1
OldCrow_008	OldCro	NA	75.2204	0.316187	13.2065	1.71262	0.0750161	0.248502	1.44032	3.8146	3.74869	0.28056	100	1.9211	NA	0.999352	1
UA3749-29	UA3749	134.21	66.8535	1.17453	14.9142	4.77197	0.039281	1.28185	3.37347	4.25069	3.25138	0.115129	100	2.8844	137.2 ka	0	0
UA3749-25	UA3749	134.21	67.5651	0.674449	15.6126	4.82846	0.133169	0.786778	2.78251	5.07867	2.4049	0.172337	100	3.8142	NA	0	0
UA3749-22	UA3749	134.21	67.7984	0.681849	15.0861	4.44167	0.169157	0.681296	2.51961	5.57474	2.8652	0.234952	100	3.9433	NA	2.95734e-06	0
UA3749-32	UA3749	134.21	67.893	0.940664	15.3077	4.65728	0.203965	0.88533	2.71853	5.05528	2.2406	0.1263	100	3.1331	NA	0	0
UA3749-40	UA3749	134.21	68.4724	0.603901	15.4246	4.49449	0.154527	0.656695	2.29592	5.41865	2.3616	0.15133	100	2.9676	NA	0	0
UA3749-14	UA3749	134.21	68.55	0.647457	15.2156	4.28372	0.17461	0.535569	2.07371	5.96822	2.42731	0.159957	100	1.8954	NA	0	0
UA3749-30	UA3749	134.21	68.5628	0.654746	15.2257	4.44341	0.1804	0.616449	2.24006	5.59972	2.3552	0.156838	100	2.5551	NA	0	0
UA3749-8	UA3749	134.21	68.6928	0.768372	15.4893	3.76516	0.079502	0.871369	2.95334	4.82513	2.42999	0.161513	100	6.0087	NA	0	0
UA3749-41	UA3749	134.21	68.8554	0.552213	15.2848	4.33971	0.163033	0.49261	1.94392	5.79844	2.4366	0.172212	100	4.684	NA	0	0
UA3749-46	UA3749	134.21	69.189	0.551585	15.2203	4.13307	0.210698	0.53749	1.9801	5.50413	2.53632	0.177356	100	2.2314	NA	0	0
UA3749-16	UA3749	134.21	69.2785	0.529394	15.4294	3.35369	0.0638977	0.689425	2.37927	4.7888	3.29517	0.248604	100	4.7603	NA	2.76993e-06	0
UA3749-23	UA3749	134.21	69.778	0.654245	14.7446	4.7003	0.19764	0.597024	2.28901	4.63903	2.29488	0.136039	100	5.8127	NA	0	0
UA3749-48	UA3749	134.21	69.7883	0.607656	14.9475	4.17199	0.102263	0.706349	2.85124	4.70551	2.0087	0.142634	100	2.5619	NA	0	0
UA3749-34	UA3749	134.21	70.0613	0.690878	15.6697	4.65712	0.204925	0.681399	2.27937	3.27753	2.36642	0.14386	100	4.1804	NA	0	0
UA3749-19	UA3749	134.21	70.085	0.592162	14.6445	3.42168	0.075781	0.478705	2.01152	4.5643	3.97088	0.200777	100	5.4591	NA	0.00100051	0
UA3749-38	UA3749	134.21	70.5222	0.625428	14.7588	3.42169	0.113217	0.479318	1.94416	4.1211	3.84432	0.219131	100	7.1552	NA	0.00300147	0
UA3749-31	UA3749	134.21	70.6443	0.487016	14.6999	3.86353	0.116622	0.340903	1.6482	5.57074	2.49595	0.171335	100	5.2588	NA	0	0
UA3749-11	UA3749	134.21	70.8435	0.343188	14.8825	3.75051	0.143645	0.382825	1.70481	4.99003	2.81221	0.189502	100	5.6371	NA	0	0
UA3749-37	UA3749	134.21	70.8848	0.366947	14.6906	3.55202	0.161292	0.317786	1.59546	4.96417	3.24174	0.290855	100	6.9248	NA	0.00100202	0
UA3749-9	UA3749	134.21	71.1796	0.455082	14.9026	3.53668	0.130614	0.39689	1.51584	5.00714	2.76907	0.137444	100	5.6733	NA	0	0
UA3749-12	UA3749	134.21	71.1851	0.320619	15.0436	2.74564	0.114078	0.345588	1.50014	5.19586	3.37199	0.229117	100	5.3144	NA	0	0
UA3749-27	UA3749	134.21	71.6927	0.466387	14.7064	3.23367	0.114962	0.297571	1.37981	4.68388	3.24872	0.227093	100	6.183	NA	0.00100056	0
UA3749-7	UA3749	134.21	71.9023	0.409996	14.4603	3.46996	0.0894669	0.395991	2.01271	4.9457	2.17915	0.173409	100	5.536	NA	0	0
UA3749-39	UA3749	134.21	72.2276	0.437052	14.2586	3.37424	0.0864958	0.346664	2.00145	4.89969	2.2541	0.147292	100	6.8221	NA	0	0
UA3749-50	UA3749	134.21	72.2848	0.404877	14.3975	3.48795	0.100965	0.35656	1.88096	4.62011	2.33632	0.167781	100	6.6221	NA	0	0
UA3749-44	UA3749	134.21	72.6764	0.262499	14.3166	2.81943	0.119546	0.183321	1.00683	4.81907	3.57721	0.282986	100	6.2421	NA	0.004	0
UA3749-49	UA3749	134.21	72.8492	0.269552	14.3209	2.57987	0.100679	0.140419	1.03359	4.86488	3.59718	0.314705	100	6.2791	NA	0.009	0
UA3749-10	UA3749	134.21	73.4506	0.187484	14.0484	2.47421	0.0993472	0.140019	0.915635	4.84001	3.56683	0.358334	100	5.1619	NA	0.008	0
UA3749-43	UA3749	134.21	74.0711	0.364003	13.5216	2.10389	0.0303516	0.189371	0.995719	4.15344	4.39595	0.225417	100	5.3296	NA	6.5994e-06	0
UA3749-1	UA3749	134.21	74.2774	0.39261	14.0864	1.77302	0.0686093	0.307317	1.72019	4.47875	2.78145	0.147581	100	4.8861	NA	0	0
UA3749-21	UA3749	134.21	74.4085	0.279848	13.6383	2.00739	0.0569228	0.16013	1.00594	3.8835	4.37906	0.232968	100	5.876	NA	0.00106298	0
UA3749-36	UA3749	134.21	74.4995	0.266044	13.4551	1.9259	0.0738136	0.186861	1.02679	3.90762	4.49027	0.21717	100	1.7444	NA	0.00902509	0
UA3749-13	UA3749	134.21	74.8008	0.36093	13.8993	1.82033	0.0742811	0.317752	1.69172	4.1676	2.72139	0.188517	100	4.7403	NA	3.56341e-06	0
UA3749-26	UA3749	134.21	74.9273	0.292033	13.7797	1.6535	0.0263202	0.321553	1.58218	4.55187	2.72897	0.17631	100	6.3495	NA	0	0
UA3749-35	UA3749	134.21	74.9637	0.29575	13.0555	1.92002	0.0393783	0.185233	1.01635	3.94152	4.40058	0.235049	100	6.1665	NA	0.0185565	0
UA3749-18	UA3749	134.21	74.9814	0.288439	13.1134	1.79511	0.100118	0.181692	1.15828	3.67483	4.46591	0.311152	100	4.5939	NA	0.0202313	0
UA3749-33	UA3749	134.21	75.2013	0.297024	12.9944	1.68873	0.040656	0.203108	1.08597	3.746	4.54917	0.250075	100	5.7261	NA	0.0191718	0
UA3749-47	UA3749	134.21	75.252	0.274688	13.0728	1.78066	0.0717927	0.27627	1.54153	3.51164	3.97998	0.308055	100	6.5281	NA	0.99045	1
UA3749-15	UA3749	134.21	75.2754	0.252063	13.1096	1.80993	0.0625895	0.220184	1.44847	3.80977	3.80436	0.268099	100	4.698	NA	0.987414	1
UA3749-20	UA3749	134.21	75.2845	0.323222	13.1523	1.75215	0.0586438	0.259811	1.45287	3.62715	3.84989	0.309217	100	5.9832	NA	0.998798	1
UA3749-45	UA3749	134.21	75.3903	0.282831	13.0817	1.79464	0.0526165	0.309745	1.4373	3.65153	3.80678	0.248799	100	6.2993	NA	0.999341	1
UA3749-4	UA3749	134.21	75.4323	0.328529	13.1619	1.96475	0.0290492	0.388108	1.84148	4.07891	2.62944	0.187964	100	4.3795	NA	5.82775e-07	0
UA3749-17	UA3749	134.21	75.6798	0.269837	13.0642	1.78682	0.0445868	0.286448	1.45273	3.41576	3.77927	0.284847	100	6.7414	NA	0.999114	1
UA3749-28	UA3749	134.21	75.68	0.291457	12.9727	1.69952	0.0366464	0.268528	1.50035	3.63016	3.72753	0.249435	100	6.602	NA	0.999684	1
UA3749-3	UA3749	134.21	75.6914	0.346207	12.9125	1.79203	0.018903	0.260611	1.35069	3.64386	3.77559	0.268864	100	4.4808	NA	0.998465	1
UA3749-24	UA3749	134.21	76.6028	0.105247	13.3792	0.878314	0.0594942	0.143791	0.812198	4.15596	3.79268	0.090709	100	5.4967	NA	0	0
UA3749-6	UA3749	134.21	78.4422	0.134209	12.3782	1.06498	0.0873418	0.188035	1.06582	4.12213	2.4019	0.14873	100	4.457	NA	0	0
UA3749-5	UA3749	134.21	78.8013	0.177056	12.5548	1.05022	0.0432193	0.16099	1.0266	3.80588	2.24822	0.170125	100	6.5949	NA	0	0
OldCrow_009	OldCro	NA	75.3776	0.32615	13.0506	1.67291	0.076236	0.305262	1.45328	3.7279	3.80835	0.260508	100	6.556	NA	0.999529	1
OldCrow_010	OldCro	NA	75.4826	0.32272	12.992	1.80965	0.0611284	0.289841	1.42421	3.66892	3.76222	0.241033	100	3.6406	NA	0.99949	1
OldCrow_011	OldCro	NA	75.718	0.272269	12.986	1.58313	0.0943318	0.273984	1.47599	3.51868	3.87698	0.258967	100	5.5822	NA	0.996756	1
OldCrow_012	OldCro	NA	75.6607	0.30533	13.1988	1.56056	0.0565355	0.277038	1.50034	3.45997	3.78457	0.253324	100	5.4558	NA	0.995073	1
OldCrow_013	OldCro	NA	75.1241	0.379902	13.1702	1.78648	0.0499615	0.313805	1.49804	3.82239	3.63657	0.282367	100	4.008	NA	0.999683	1
OldCrow_014	OldCro	NA	75.2929	0.339911	12.9419	1.70235	0.0726528	0.30227	1.50829	3.83817	3.78005	0.285967	100	3.7973	NA	0.999674	1
UA3751-44	UA3751	167.67	67.8538	0.602648	15.3716	4.70322	0.212144	0.656454	2.32738	5.90251	2.25128	0.153645	100	3.9234	168.89 ka	0	0
UA3751-14	UA3751	167.67	68.1218	0.6145	15.3574	4.59197	0.14599	0.591037	2.41272	5.77281	2.28396	0.139106	100	3.63	NA	0	0
UA3751-11	UA3751	167.67	68.166	0.517548	15.2463	4.59366	0.194374	0.563597	2.32669	5.72027	2.50333	0.217226	100	3.7709	NA	0	0
UA3751-8	UA3751	167.67	68.1872	0.621139	15.338	4.57377	0.193319	0.572296	2.25625	5.77328	2.34522	0.180189	100	5.3805	NA	0	0
UA3751-15	UA3751	167.67	68.296	0.660487	15.204	4.58289	0.157566	0.674184	2.2237	5.67749	2.39594	0.165089	100	4.6392	NA	0	0
UA3751-26	UA3751	167.67	68.3912	0.586196	15.5159	4.40848	0.22763	0.582256	2.0607	5.52404	2.52228	0.234363	100	9.2567	NA	0	0
UA3751-31	UA3751	167.67	68.5388	0.576194	15.2024	4.38455	0.216786	0.553721	2.02817	5.99945	2.39074	0.141041	100	4.6886	NA	0	0
UA3751-7	UA3751	167.67	68.6302	0.70017	15.402	4.38504	0.181358	0.600091	2.13886	5.441	2.4112	0.142224	100	3.6395	NA	0	0
UA3751-37	UA3751	167.67	68.6883	0.62553	15.4574	4.57543	0.179614	0.657513	2.2597	4.93571	2.44821	0.222738	100	8.5953	NA	0	0
UA3751-30	UA3751	167.67	68.7409	0.688734	15.5964	4.38876	0.133299	0.625878	2.21929	5.07761	2.43269	0.124522	100	7.5913	NA	0	0
UA3751-12	UA3751	167.67	68.7684	0.672458	15.4697	4.41914	0.19051	0.585671	2.18853	5.16024	2.4248	0.155626	100	5.3551	NA	0	0
UA3751-29	UA3751	167.67	68.9952	0.506916	15.3835	4.12385	0.202353	0.57025	2.07559	5.45101	2.59673	0.122197	100	6.6404	NA	0	0
UA3751-4	UA3751	167.67	69.0417	0.594167	15.2346	4.2489	0.179486	0.536915	2.12642	5.50488	2.40019	0.171455	100	6.4203	NA	0	0
UA3751-19	UA3751	167.67	69.5851	0.61929	15.1208	4.06644	0.159926	0.500794	1.95687	5.35464	2.51693	0.153937	100	6.7808	NA	0	0
UA3751-5	UA3751	167.67	69.908	0.544704	14.9283	4.17543	0.127179	0.624613	2.61321	4.82908	2.09571	0.198636	100	3.3156	NA	0	0
UA3751-9	UA3751	167.67	70.0855	0.547453	14.7588	3.39045	0.079327	0.408401	1.9824	4.60616	3.99244	0.192581	100	5.1949	NA	0	0
UA3751-10	UA3751	167.67	70.2084	0.579044	14.9049	3.8293	0.129607	0.641078	2.73696	4.86096	2.0078	0.13166	100	1.8838	NA	0	0
UA3751-13	UA3751	167.67	70.281	0.491108	14.9936	4.16039	0.186712	0.352479	1.77027	5.21381	2.39338	0.203111	100	6.29	NA	0	0
UA3751-38	UA3751	167.67	70.829	0.550253	14.8872	3.44523	0.156388	0.437591	1.55064	5.25196	2.73687	0.200016	100	7.1096	NA	0	0
UA3751-34	UA3751	167.67	70.851	0.406733	14.5661	3.86731	0.169499	0.194662	1.4864	5.71456	2.59539	0.191644	100	6.2897	NA	0	0
UA3751-16	UA3751	167.67	71.0008	0.635086	13.7485	3.8434	0.0754737	0.524251	2.12468	4.25325	3.65781	0.176707	100	5.7394	NA	0.000160276	0
UA3751-33	UA3751	167.67	71.26	0.369473	14.6487	3.2353	0.128765	0.288731	1.49604	5.19354	3.20141	0.22982	100	6.3162	NA	3.518e-07	0
UA3751-35	UA3751	167.67	71.414	0.326967	14.6398	3.87276	0.208274	0.213053	1.47181	5.1387	2.55969	0.200108	100	6.6287	NA	0	0
UA3751-40	UA3751	167.67	72.1366	0.569748	14.7421	3.33101	0.0778891	0.521926	1.90387	2.64444	3.91184	0.207532	100	6.6712	NA	5.7956e-05	0
UA3751-6	UA3751	167.67	72.4205	0.332974	15.8446	1.67491	0.0591164	0.571125	2.39278	4.21668	2.45065	0.0473031	100	7.2153	NA	4.32167e-07	0
UA3751-1	UA3751	167.67	72.7955	0.252221	14.0316	2.91873	0.144578	0.200563	1.10959	4.84237	3.51259	0.248085	100	7.2751	NA	0.001	0
UA3751-3	UA3751	167.67	73.3457	0.251882	14.2052	2.3962	0.0982001	0.17479	0.926091	4.92852	3.48839	0.238966	100	6.5816	NA	0.00200031	0
UA3751-36	UA3751	167.67	73.6052	0.407463	14.8473	3.39582	0.159588	0.356436	1.63151	2.14612	3.28015	0.22015	100	7.1923	NA	0	0
UA3751-39	UA3751	167.67	74.1116	0.318217	13.7035	2.01144	0.0678544	0.158505	1.02811	4.00928	4.41136	0.232619	100	6.8888	NA	0.00300784	0
UA3751-47	UA3751	167.67	74.1894	0.382627	14.1146	2.20507	0.11162	0.512417	2.66565	4.28293	1.40226	0.172274	100	8.8705	NA	5.7886e-07	0
UA3751-25	UA3751	167.67	74.3829	0.287544	13.5376	1.94013	0.065462	0.167105	1.01846	4.06233	4.35921	0.231523	100	5.6063	NA	0.0020663	0
UA3751-42	UA3751	167.67	74.3837	0.308939	13.3002	2.05388	0.0517351	0.183479	1.07219	4.1061	4.37325	0.214894	100	4.3995	NA	0.0130517	0
UA3751-43	UA3751	167.67	74.7616	0.366191	13.504	2.0105	0.0643752	0.50584	2.24592	3.71139	2.65071	0.231848	100	10.3226	NA	0.00115807	0
UA3751-50	UA3751	167.67	74.8228	0.305815	13.2485	1.61675	0.0687519	0.202573	1.16609	3.92544	4.47384	0.218734	100	5.9779	NA	0.0213704	0
UA3751-17	UA3751	167.67	74.9527	0.392444	13.8044	1.89247	0.0654795	0.38111	1.94293	4.71301	1.76055	0.122715	100	5.6834	NA	0	0
UA3751-22	UA3751	167.67	75.176	0.289191	13.1709	1.74249	0.0159504	0.190482	1.13008	3.59918	4.52116	0.212377	100	5.2999	NA	0.0391524	0
UA3751-2	UA3751	167.67	75.2591	0.292488	13.1375	1.72541	0.0244418	0.239971	1.13997	3.32252	4.60826	0.323406	100	10.2438	NA	0.0160592	0
UA3751-49	UA3751	167.67	75.2788	0.348024	13.1379	1.6811	0	0.201875	1.09995	3.72412	4.36722	0.207986	100	6.4957	NA	0.0497036	0
UA3751-45	UA3751	167.67	76.9201	0.132014	13.3345	0.763871	0.120263	0.0607064	0.874465	4.0021	3.68568	0.137336	100	7.2865	NA	0.001	0
UA3751-27	UA3751	167.67	77.4886	0.228587	12.6281	1.29073	0.0429901	0.219523	1.17663	3.63002	3.15436	0.181361	100	7.2111	NA	1.04692e-05	0
UA3751-21	UA3751	167.67	77.5706	0.286702	12.6071	1.20921	0.0523192	0.191476	1.18886	3.7648	3.01068	0.152876	100	5.4095	NA	2.48423e-07	0
UA3751-46	UA3751	167.67	77.6817	0.179523	12.8687	1.62777	0.0561364	0.304604	1.69024	3.88514	1.56586	0.181272	100	6.8466	NA	0.008	0
UA3751-48	UA3751	167.67	77.6921	0.210479	12.5361	1.18862	0.0472219	0.156823	1.16766	3.98007	2.91073	0.142173	100	6.7127	NA	0	0
UA3751-28	UA3751	167.67	77.8347	0.178333	12.6532	1.22703	0	0.134783	1.12862	3.92669	2.81672	0.129086	100	6.0741	NA	0	0
UA3751-18	UA3751	167.67	78.0798	0.273766	11.978	1.2688	0.0450434	0.232046	1.4134	3.31157	3.27159	0.16246	100	5.4068	NA	0.00200274	0
UA3751-20	UA3751	167.67	78.2479	0.189643	12.4964	1.12328	0.100286	0.173317	1.08756	4.05924	2.40716	0.148786	100	5.3995	NA	0	0
UA3751-32	UA3751	167.67	78.5236	0.202111	12.2461	1.04287	0.042696	0.170533	1.13258	4.02186	2.47106	0.18924	100	6.5065	NA	0	0
UA3751-23	UA3751	167.67	78.7204	0.133722	12.2992	1.03385	0.0117375	0.15586	1.05808	3.98694	2.46516	0.174339	100	6.2153	NA	0	0
UA3751-24	UA3751	167.67	78.8782	0.168524	12.2651	1.04485	0	0.176919	1.01967	4.00053	2.33214	0.147245	100	7.0688	NA	0	0
OldCrow_015	OldCro	NA	75.4084	0.3758	12.9992	1.69425	0.0452601	0.27266	1.49414	3.84347	3.66451	0.261266	100	2.7378	NA	0.999791	1
OldCrow_016	OldCro	NA	75.2482	0.23484	13.058	1.70034	0.052437	0.250611	1.46709	3.99145	3.78266	0.276635	100	5.5647	NA	0.994085	1
OldCrow_017	OldCro	NA	75.5507	0.290323	12.8884	1.62837	0.0819689	0.291601	1.45845	3.84072	3.76949	0.258147	100	4.3247	NA	0.999665	1
OldCrow_018	OldCro	NA	75.4792	0.298238	13.0927	1.64879	0.0668724	0.315704	1.41323	3.69067	3.78414	0.271816	100	5.3676	NA	0.999579	1
OldCrow_019	OldCro	NA	75.227	0.371133	13.0244	1.69794	0.0963828	0.266766	1.44495	3.88237	3.79535	0.250183	100	2.9412	NA	0.99923	1
OldCrow_020	OldCro	NA	75.4219	0.301099	13.1548	1.63916	0.0289277	0.280712	1.45959	3.76709	3.73312	0.275836	100	4.8802	NA	0.999462	1
OldCrow_021	OldCro	NA	76.8067	0.246431	13.0601	1.75197	0.0410426	0.29549	1.54294	2.13466	3.92111	0.257754	100	6.1025	NA	0.69666	0
OldCrow_022	OldCro	NA	75.9522	0.294614	12.7523	1.6636	0.021641	0.25665	1.41979	3.74925	3.68012	0.270935	100	4.6161	NA	0.980683	1
UA3752-50	UA3752	201.82	67.6141	0.647339	15.6189	4.8582	0.237431	0.716895	2.41149	5.49777	2.24032	0.203394	100	7.0499	199.29 ka	0	0
UA3752-44	UA3752	201.82	68.7414	0.636171	15.5409	4.49427	0.181782	0.635499	2.20664	5.03642	2.39065	0.176002	100	6.474	NA	0	0
UA3752-3	UA3752	201.82	68.875	0.540229	15.1387	4.39512	0.204237	0.535082	2.13739	5.60643	2.44607	0.157339	100	2.1007	NA	0	0
UA3752-8	UA3752	201.82	68.8758	0.530831	15.6614	4.38908	0.223731	0.539454	2.0949	5.39369	2.16201	0.166796	100	5.1421	NA	0	0
UA3752-10	UA3752	201.82	68.8819	0.592431	15.3997	4.11203	0.211075	0.577408	2.03292	5.56444	2.49889	0.166884	100	4.6289	NA	0	0
UA3752-33	UA3752	201.82	68.9647	0.636347	15.321	4.04864	0.171215	0.566396	2.01301	5.68304	2.46262	0.171954	100	3.1829	NA	0	0
UA3752-11	UA3752	201.82	69.3461	0.646574	15.1371	4.35091	0.129694	0.46584	2.1347	4.57174	3.04871	0.217725	100	9.1971	NA	3.57992e-07	0
UA3752-32	UA3752	201.82	69.519	0.526284	15.0891	4.29669	0.208989	0.556766	1.99523	5.38196	2.27678	0.192784	100	3.0056	NA	0	0
UA3752-41	UA3752	201.82	69.7659	0.467256	15.4839	3.85089	0.221333	0.390926	1.7073	5.71206	2.27419	0.163078	100	6.4436	NA	0	0
UA3752-24	UA3752	201.82	69.8759	0.542593	15.4076	4.39441	0.193947	0.502485	2.09203	4.34004	2.54568	0.135906	100	6.0721	NA	0	0
UA3752-39	UA3752	201.82	70.7282	0.403771	15.1913	3.81897	0.196802	0.33315	1.60517	5.20616	2.35784	0.204894	100	8.0226	NA	0	0
UA3752-20	UA3752	201.82	70.7926	0.501286	15.184	3.42697	0.220761	0.378284	1.55376	5.0699	2.72293	0.193025	100	6.2289	NA	0	0
UA3752-25	UA3752	201.82	70.8231	0.415466	14.9983	3.28197	0.161849	0.372396	1.57881	5.60184	2.60875	0.203455	100	5.9489	NA	0	0
UA3752-30	UA3752	201.82	71.3757	0.461465	14.8198	3.44968	0.133246	0.384393	1.49386	4.93097	2.82085	0.167933	100	7.3694	NA	0	0
UA3752-38	UA3752	201.82	71.652	0.606668	14.5244	2.83024	0.162822	0.549058	1.74977	4.9602	2.8394	0.161935	100	6.4019	NA	0	0
UA3752-5	UA3752	201.82	71.8806	0.40828	14.5425	3.57579	0.186926	0.148129	1.29965	5.10618	2.63941	0.274518	100	8.3109	NA	0.005	0
UA3752-1	UA3752	201.82	72.4171	0.353522	14.7794	2.87018	0.0903579	0.287872	1.27037	4.4672	3.31016	0.198709	100	8.8182	NA	0.00100018	0
UA3752-14	UA3752	201.82	73.1186	0.37205	14.1745	2.30503	0.0318134	0.290701	1.29602	3.80083	4.42194	0.24349	100	9.3464	NA	0.006	0
UA3752-12	UA3752	201.82	73.1562	0.36727	13.6436	2.6157	0.0397738	0.22525	1.31969	3.84686	4.60402	0.234463	100	6.793	NA	0.00300032	0
UA3752-13	UA3752	201.82	73.2239	0.498717	14.3934	2.24467	0.0923773	0.348639	1.14668	4.96059	2.98686	0.134549	100	7.8009	NA	0	0
UA3752-18	UA3752	201.82	73.3308	0.209618	15.4095	1.478	0.0840256	0.520999	1.99502	4.2624	2.67634	0.0429055	100	6.6927	NA	0	0
UA3752-29	UA3752	201.82	73.4642	0.494804	15.3398	3.38003	0.168011	0.374263	1.58543	2.28908	2.74708	0.203215	100	7.7028	NA	0.003	0
UA3752-35	UA3752	201.82	73.785	0.244913	13.9905	2.41017	0.0808217	0.137405	0.904228	4.43418	3.77318	0.309332	100	8.2165	NA	0.00400034	0
UA3752-37	UA3752	201.82	74.1922	0.254587	13.4332	1.96507	0.0733357	0.199983	1.06595	4.24796	4.36792	0.257925	100	6.2708	NA	0.00201286	0
UA3752-16	UA3752	201.82	74.5678	0.218429	13.3331	2.00602	0.0530303	0.198238	1.0402	4.16566	4.22128	0.253527	100	6.7081	NA	0.0135054	0
UA3752-40	UA3752	201.82	74.6178	0.297075	13.2976	1.9587	0.0605464	0.150083	0.798959	4.1237	4.5017	0.250368	100	4.5971	NA	0.0140188	0
UA3752-6	UA3752	201.82	75.0766	0.281162	13.0736	1.74925	0.0695616	0.193725	1.18684	3.81189	4.386	0.221178	100	5.1316	NA	0.0305975	0
UA3752-47	UA3752	201.82	75.1828	0.335978	13.1965	1.53367	0.0249879	0.209008	1.13605	3.87548	4.22649	0.360515	100	6.2828	NA	0.0513255	0
UA3752-42	UA3752	201.82	75.242	0.329861	13.1026	1.75579	0.00147937	0.17272	1.14044	3.79861	4.24565	0.27234	100	6.9201	NA	0.0487967	0
UA3752-49	UA3752	201.82	76.1179	0.237974	12.5454	1.44755	0.0628508	0.199922	1.24235	3.27995	4.55919	0.396451	100	5.7069	NA	0.0684364	0
UA3752-31	UA3752	201.82	76.1219	0.197316	13.1808	1.52808	0.091881	0.346849	1.87938	3.95176	2.56111	0.181979	100	5.641	NA	0	0
UA3752-45	UA3752	201.82	76.3672	0.203375	13.4927	0.781843	0.0629718	0.150191	0.808586	4.23282	3.82481	0.0973626	100	5.8468	NA	0	0
UA3752-19	UA3752	201.82	76.8584	0.0351345	13.389	0.731529	0.176819	0.0841811	0.864065	3.97433	3.78423	0.132024	100	7.3474	NA	0	0
UA3752-9	UA3752	201.82	76.9014	0.126393	13.4593	0.817027	0.132273	0.0767675	0.856724	3.89521	3.65153	0.107637	100	7.3605	NA	0	0
UA3752-34	UA3752	201.82	76.9089	0.112432	13.3036	0.739884	0.115092	0.0613092	0.832392	4.11052	3.73734	0.101411	100	6.6616	NA	0.001	0
UA3752-27	UA3752	201.82	76.9118	0.0957748	13.4002	0.849024	0.155266	0.079907	0.832559	3.89388	3.67811	0.133659	100	6.8868	NA	0	0
UA3752-23	UA3752	201.82	77.0282	0.0902946	13.3284	0.784312	0.150607	0.0771513	0.905103	3.96239	3.58053	0.12015	100	5.8227	NA	0.001	0
UA3752-22	UA3752	201.82	77.1198	0.0515792	13.2271	0.817535	0.120633	0.064193	0.89112	3.69929	3.91237	0.124529	100	7.5616	NA	0	0
UA3752-48	UA3752	201.82	77.1629	0.242009	13.3633	1.24154	0.142264	0.27983	1.35776	3.8681	2.26164	0.104319	100	6.9374	NA	0	0
UA3752-7	UA3752	201.82	77.1757	0.0725275	13.0574	0.744674	0.147259	0.0820336	0.846153	3.78361	4.01655	0.0955926	100	6.4907	NA	0	0
UA3752-21	UA3752	201.82	77.4303	0.0835032	13.0787	0.768328	0.168691	0.0344	0.866582	3.7468	3.75137	0.092026	100	6.1222	NA	0	0
UA3752-4	UA3752	201.82	77.5001	0.121397	12.9067	0.738843	0	0.0825433	0.578308	3.68743	4.29094	0.120994	100	5.727	NA	0	0
UA3752-15	UA3752	201.82	77.5798	0.0713038	13.0139	0.821613	0.151679	0.0788417	0.870456	3.62594	3.71356	0.094213	100	8.3163	NA	0	0
UA3752-17	UA3752	201.82	78.3239	0.192523	12.5903	1.16639	0.0427809	0.173612	1.07082	3.9416	2.39466	0.133618	100	6.6522	NA	0	0
UA3752-26	UA3752	201.82	78.5169	0.253921	12.3601	1.09195	0.037974	0.192202	1.05403	3.94383	2.40942	0.18042	100	5.7012	NA	0	0
UA3752-2	UA3752	201.82	78.7076	0.16761	12.2132	1.07574	0.0809166	0.157195	1.04938	4.05475	2.39133	0.132113	100	6.3517	NA	0	0
UA3752-43	UA3752	201.82	78.7373	0.182225	12.1803	1.13426	0.0370263	0.151254	1.04806	4.19936	2.21327	0.15095	100	6.8825	NA	0	0
UA3752-28	UA3752	201.82	78.881	0.0379479	13.3049	0.796439	0.141761	0.0733918	0.911308	2.10905	3.65099	0.120484	100	7.6681	NA	0.002	0
UA3752-46	UA3752	201.82	79.8513	0.164738	12.4891	1.02495	0.0957685	0.170584	1.0631	2.64284	2.3525	0.187332	100	7.7755	NA	0	0
UA3752-36	UA3752	201.82	80.9246	0.244486	12.4569	1.11466	0.0296717	0.170581	1.08966	1.39674	2.4393	0.172364	100	7.0664	NA	0	0
OldCrow_023	OldCro	NA	76.8732	0.247686	13.1403	1.72372	0.0658768	0.24708	1.52013	2.13654	3.82968	0.278653	100	5.8106	NA	0.671387	0
OldCrow_024	OldCro	NA	76.7477	0.287936	13.1333	1.80435	0.04511	0.283648	1.54594	2.17897	3.76975	0.262661	100	8.2931	NA	0.581281	0
OldCrow_025	OldCro	NA	75.4344	0.354109	13.1232	1.72652	0.0454184	0.291506	1.49268	3.53516	3.75238	0.315909	100	5.9081	NA	0.999433	1
OldCrow_026	OldCro	NA	75.6116	0.312947	13.0534	1.72437	0.0536408	0.290757	1.54652	3.40741	3.76282	0.305431	100	2.3336	NA	0.999166	1
OldCrow_027	OldCro	NA	75.4235	0.24996	13.1153	1.64774	0.0259797	0.254984	1.46682	3.83	3.8021	0.236949	100	4.4562	NA	0.998192	1
OldCrow_028	OldCro	NA	75.4258	0.253863	13.0018	1.75895	0.0662796	0.239442	1.44772	3.91664	3.6713	0.28177	100	4.3114	NA	0.999659	1
OldCrow_029	OldCro	NA	75.0015	0.368799	13.0819	1.74841	0.073262	0.244316	1.48663	3.80848	3.95683	0.296747	100	4.0185	NA	0.990115	1
OldCrow_030	OldCro	NA	75.4145	0.299136	13.0218	1.67118	0.102811	0.248905	1.50035	3.76979	3.73881	0.300573	100	2.0908	NA	0.999794	1
UA3750-28	UA3750	141.57	67.9525	0.665834	15.4428	4.57942	0.225502	0.568662	2.21761	5.75011	2.46638	0.169385	100	6.1512	144.17 ka	0	0
UA3750-40	UA3750	141.57	69.9106	0.450342	15.0478	3.96058	0.138518	0.420771	1.68778	5.57042	2.67881	0.173636	100	4.7083	NA	0	0
UA3750-49	UA3750	141.57	70.1524	0.477284	14.9237	3.83145	0.201173	0.41446	1.66737	5.53559	2.65975	0.176573	100	5.672	NA	0	0
UA3750-18	UA3750	141.57	70.9389	0.543991	15.0309	3.85753	0.188192	0.342928	1.61629	4.83942	2.47883	0.21045	100	8.5925	NA	0	0
UA3750-48	UA3750	141.57	70.992	0.351217	14.7765	3.18211	0.121345	0.425274	1.57456	5.09782	3.31646	0.210046	100	6.9997	NA	0	0
UA3750-39	UA3750	141.57	71.5021	0.373867	14.8439	3.10844	0.121557	0.252465	1.36076	4.67261	3.5355	0.295602	100	7.1387	NA	0.006	0
UA3750-35	UA3750	141.57	71.5559	0.605249	14.5356	2.69915	0.0802962	0.524327	1.8679	4.9698	2.94164	0.284258	100	7.3431	NA	5.08643e-06	0
UA3750-15	UA3750	141.57	71.5709	0.419388	14.7455	2.93049	0.0864954	0.349558	1.64271	4.63889	3.42208	0.250497	100	6.0389	NA	0.00200063	0
UA3750-2	UA3750	141.57	72.853	0.293398	14.3903	2.55026	0.133522	0.200889	1.05371	4.65343	3.67856	0.249201	100	7.1744	NA	0	0
UA3750-7	UA3750	141.57	73.1462	0.25916	14.2731	2.55847	0.0723549	0.137721	0.995261	4.72654	3.63748	0.250345	100	6.6822	NA	0.001	0
UA3750-3	UA3750	141.57	74.1759	0.288259	13.5203	2.55833	0.0621444	0.258239	1.3912	4.86207	2.75411	0.167071	100	6.8781	NA	0	0
UA3750-1	UA3750	141.57	74.2571	0.363366	13.7927	2.57407	0.0747898	0.19285	1.35142	4.57611	2.67634	0.182344	100	7.8992	NA	0	0
UA3750-36	UA3750	141.57	74.2974	0.415644	13.8754	1.86574	0.107837	0.348628	1.51273	4.59247	2.88905	0.122664	100	6.5767	NA	0	0
UA3750-4	UA3750	141.57	74.3347	0.320651	13.5749	2.62779	0.0830781	0.200468	1.3714	4.57002	2.80709	0.142002	100	7.1199	NA	0	0
UA3750-41	UA3750	141.57	74.5405	0.289041	13.4133	2.54558	0.118931	0.20359	1.35177	4.66882	2.745	0.159407	100	6.1112	NA	0	0
UA3750-42	UA3750	141.57	74.7282	0.350145	13.5865	2.52028	0.0619227	0.226989	1.32327	4.28208	2.81386	0.13799	100	6.4931	NA	2.92756e-07	0
UA3750-32	UA3750	141.57	74.8272	0.47703	12.9883	2.23538	0.0263277	0.38042	1.76442	3.91576	3.23585	0.192776	100	21.3793	NA	0.0981463	0
UA3750-26	UA3750	141.57	74.851	0.272966	13.7544	2.59411	0.0921716	0.217782	1.43108	3.9055	2.73621	0.18694	100	7.2057	NA	0.00401082	0
UA3750-34	UA3750	141.57	74.8653	0.329426	13.1947	1.79246	0.0642866	0.335814	1.51066	3.6964	3.99677	0.27677	100	7.6775	NA	0.94961	1
UA3750-29	UA3750	141.57	74.8751	0.324694	13.1509	1.76556	0.061994	0.293328	1.4929	3.80542	3.99985	0.297447	100	6.4732	NA	0.963767	1
UA3750-21	UA3750	141.57	75.0143	0.267311	13.1164	1.8733	0.0460198	0.268533	1.43714	3.78361	3.93718	0.330902	100	10.0169	NA	0.987856	1
UA3750-24	UA3750	141.57	75.0152	0.319001	13.2355	1.75228	0.0102015	0.297783	1.54367	3.90885	3.70782	0.270953	100	5.2689	NA	0.997778	1
UA3750-50	UA3750	141.57	75.02	0.370819	13.0673	1.72128	0.0500389	0.266405	1.52169	3.80795	3.93708	0.306657	100	6.2449	NA	0.995405	1
UA3750-25	UA3750	141.57	75.107	0.314773	13.0311	1.75014	0.0993806	0.270896	1.5649	3.90039	3.74711	0.276859	100	6.9205	NA	0.999547	1
UA3750-10	UA3750	141.57	75.1414	0.321124	13.216	2.47825	0.0488957	0.23506	1.30781	4.42083	2.70874	0.157439	100	6.9202	NA	0.002	0
UA3750-14	UA3750	141.57	75.1464	0.281977	13.2293	1.75511	0.029531	0.237804	1.48796	3.68501	3.93105	0.278781	100	6.5118	NA	0.990445	1
UA3750-13	UA3750	141.57	75.17	0.321756	13.2631	1.71316	0.0506104	0.296174	1.4182	3.77864	3.77414	0.276698	100	7.2661	NA	0.998744	1
UA3750-43	UA3750	141.57	75.1775	0.315345	13.2194	1.70446	0.0683978	0.247996	1.46519	3.6155	3.97584	0.271712	100	5.1724	NA	0.978071	1
UA3750-31	UA3750	141.57	75.2114	0.365737	13.1556	1.84958	0.0504829	0.260197	1.44597	3.71641	3.76167	0.236219	100	7.0319	NA	0.999326	1
UA3750-8	UA3750	141.57	75.2201	0.372218	13.2745	1.73303	0.0615037	0.258655	1.47636	3.60007	3.80934	0.250774	100	8.0104	NA	0.998769	1
UA3750-37	UA3750	141.57	75.252	0.355303	13.1925	1.76377	0.0235709	0.290603	1.4683	3.76252	3.68524	0.266356	100	6.304	NA	0.999626	1
UA3750-33	UA3750	141.57	75.2583	0.235525	13.1401	1.70562	0.0596249	0.2587	1.4746	3.65245	3.97294	0.312721	100	5.0682	NA	0.986931	1
UA3750-20	UA3750	141.57	75.2594	0.321936	13.0946	1.7477	0.0747507	0.257198	1.43177	3.8242	3.76551	0.287823	100	5.8096	NA	0.999526	1
UA3750-23	UA3750	141.57	75.2657	0.316897	13.2373	1.69412	0.065577	0.280994	1.41667	3.58596	3.9197	0.280396	100	7.3517	NA	0.995423	1
UA3750-5	UA3750	141.57	75.2734	0.257276	13.2396	1.74542	0.0817626	0.293574	1.52381	3.43249	3.92695	0.291707	100	7.1874	NA	0.989043	1
UA3750-47	UA3750	141.57	75.2792	0.320796	13.3398	1.72221	0.0430013	0.269146	1.3882	3.68325	3.73387	0.284818	100	6.9424	NA	0.987709	1
UA3750-17	UA3750	141.57	75.2848	0.349842	13.0806	1.75279	0.033786	0.236315	1.44043	3.78961	3.80675	0.290594	100	6.0174	NA	0.999283	1
UA3750-46	UA3750	141.57	75.334	0.292944	13.0683	1.71189	0.0571314	0.235694	1.48208	3.70957	3.8991	0.270298	100	5.8083	NA	0.995925	1
UA3750-51	UA3750	141.57	75.3389	0.240372	13.0453	1.72771	0.0712333	0.247092	1.54155	3.73008	3.81561	0.312696	100	7.0294	NA	0.99971	1
UA3750-16	UA3750	141.57	75.3389	0.268095	13.1603	1.75746	0.0749471	0.247982	1.52056	3.68983	3.73284	0.26991	100	6.0657	NA	0.999736	1
UA3750-19	UA3750	141.57	75.4131	0.284951	13.2359	1.65822	0.0693909	0.240265	1.4538	3.68975	3.73088	0.288859	100	6.4733	NA	0.998562	1
UA3750-38	UA3750	141.57	75.4348	0.257066	13.1569	1.6296	0.0662261	0.253941	1.43481	3.65933	3.88523	0.286927	100	6.2016	NA	0.99864	1
UA3750-22	UA3750	141.57	75.4742	0.261362	13.1087	1.75483	0.0176464	0.23762	1.4605	3.76745	3.71961	0.255901	100	6.0998	NA	0.999548	1
UA3750-44	UA3750	141.57	75.4888	0.280531	13.0305	1.6657	0.0735341	0.272982	1.44821	3.73355	3.79684	0.270332	100	6.1673	NA	0.999664	1
UA3750-45	UA3750	141.57	75.5348	0.278281	12.8928	1.71221	0.0867133	0.267799	1.44585	3.71462	3.91058	0.202046	100	6.1055	NA	0.940827	1
UA3750-27	UA3750	141.57	76.0687	0.109579	14.2869	0.976213	0.131913	0.285122	1.72401	4.05234	2.28516	0.103323	100	7.7701	NA	0	0
UA3750-11	UA3750	141.57	76.7948	0.0686295	13.4507	0.823666	0.137249	0.061467	0.874905	4.02187	3.70728	0.0769905	100	7.3795	NA	0	0
UA3750-6	UA3750	141.57	77.1688	0.0341884	13.257	0.755408	0.129598	0.0647498	0.858636	3.91109	3.72043	0.129232	100	7.1704	NA	0	0
UA3750-30	UA3750	141.57	77.9138	0.0951098	12.817	1.19372	0.0390725	0.154284	1.09534	4.13787	2.41757	0.175845	100	8.0147	NA	0	0
UA3750-9	UA3750	141.57	78.6939	0.154113	12.4212	1.0693	0.0537105	0.170067	1.09496	3.76245	2.46335	0.150994	100	7.3551	NA	0	0
UA3750-12	UA3750	141.57	78.8037	0.138671	12.181	0.990441	0.0326541	0.155263	1.06292	4.06165	2.4547	0.153575	100	6.8449	NA	0	0
OldCrow_031	OldCro	NA	75.6155	0.271487	13.032	1.64557	0.0453545	0.24506	1.48579	3.65864	3.82278	0.22966	100	5.6235	NA	0.996045	1
OldCrow_032	OldCro	NA	75.6396	0.349201	12.9942	1.74392	0.0190728	0.241112	1.46093	3.56329	3.7602	0.295021	100	5.8973	NA	0.999584	1
OldCrow_033	OldCro	NA	76.49	0.315213	13.3837	1.74247	0.0469189	0.290592	1.53002	2.29333	3.71587	0.247772	100	2.8536	NA	0.687579	0
OldCrow_034	OldCro	NA	75.3121	0.357908	13.0803	1.64058	0.0566131	0.303306	1.4594	3.71289	3.87535	0.260362	100	4.8666	NA	0.998827	1
OldCrow_035	OldCro	NA	75.1486	0.308658	13.2381	1.7046	0.0862375	0.258945	1.54982	3.80122	3.7084	0.252393	100	5.5225	NA	0.999544	1
OldCrow_036	OldCro	NA	75.2317	0.345733	13.0109	1.73922	0.060723	0.260085	1.49284	3.88067	3.76641	0.273436	100	6.752	NA	0.999599	1
OldCrow_037	OldCro	NA	75.5543	0.315927	13.0148	1.64605	0.0393528	0.26008	1.4622	3.74089	3.74538	0.285503	100	5.2189	NA	0.999756	1
OldCrow_038	OldCro	NA	75.3728	0.364414	13.061	1.79499	0.0529942	0.280391	1.46493	3.74764	3.66406	0.25427	100	6.1596	NA	0.999777	1
UA3753-5	UA3753	210.04	62.9942	0.684822	22.1045	4.1615	0.133967	0.647238	2.0485	4.76477	2.19382	0.344433	100	13.8197	205.58 ka	0	0
UA3753-36	UA3753	210.04	67.5161	0.592761	14.7115	5.60533	0.291088	0.582616	2.71214	5.35373	2.47897	0.201186	100	5.4117	NA	0	0
UA3753-30	UA3753	210.04	67.8848	0.653271	15.6541	4.58371	0.184505	0.671826	2.25111	5.58519	2.39261	0.179259	100	5.143	NA	0	0
UA3753-50	UA3753	210.04	68.1175	0.793031	14.9919	5.00674	0.167673	0.668558	2.32419	5.26034	2.55409	0.149837	100	2.9573	NA	0	0
UA3753-39	UA3753	210.04	68.1881	0.646129	15.1983	4.63992	0.180753	0.66368	2.23629	5.79871	2.32949	0.153334	100	3.1369	NA	0	0
UA3753-43	UA3753	210.04	68.3351	0.625156	15.5597	4.65017	0.191013	0.658873	2.23845	5.22061	2.41363	0.138462	100	7.5846	NA	0	0
UA3753-11	UA3753	210.04	68.4726	0.610248	15.0865	4.62158	0.192711	0.59589	2.19217	5.75348	2.35412	0.155908	100	4.3654	NA	0	0
UA3753-21	UA3753	210.04	68.506	0.641934	15.4859	4.45025	0.141804	0.587748	2.20081	5.43389	2.43557	0.149952	100	3.8231	NA	0	0
UA3753-16	UA3753	210.04	68.674	0.652463	15.4559	4.57955	0.222472	0.613802	2.22631	5.12263	2.31982	0.171674	100	2.8529	NA	0	0
UA3753-27	UA3753	210.04	68.7509	0.734837	15.3879	4.52905	0.189594	0.615809	2.17807	5.11761	2.38203	0.147357	100	6.949	NA	0	0
UA3753-13	UA3753	210.04	68.79	0.496917	15.3334	4.50624	0.192991	0.493033	2.01016	5.46825	2.59633	0.145425	100	7.311	NA	0	0
UA3753-20	UA3753	210.04	68.8594	0.59122	15.2647	4.44879	0.188536	0.612554	2.04493	5.53687	2.33357	0.154183	100	5.7495	NA	0	0
UA3753-31	UA3753	210.04	68.9978	0.608401	15.1267	4.313	0.146625	0.565077	2.02741	5.69323	2.38101	0.181797	100	4.0807	NA	0	0
UA3753-26	UA3753	210.04	69.0196	0.623721	15.2928	3.892	0.161791	0.62438	2.07416	5.47571	2.67751	0.20455	100	6.2038	NA	0	0
UA3753-38	UA3753	210.04	69.331	0.530871	15.444	4.04732	0.186026	0.498529	1.8326	5.45867	2.52633	0.186802	100	6.5495	NA	0	0
UA3753-10	UA3753	210.04	69.5901	0.575214	15.3055	3.98042	0.203295	0.521177	1.86622	5.18617	2.49753	0.354367	100	18.0948	NA	0	0
UA3753-34	UA3753	210.04	70.918	0.414991	14.7296	3.75525	0.103505	0.349221	1.73797	5.0034	2.82977	0.204386	100	7.9834	NA	0	0
UA3753-49	UA3753	210.04	71.264	0.365875	14.8563	3.24555	0.110688	0.283749	1.38656	4.99722	3.29661	0.249754	100	7.5893	NA	0	0
UA3753-7	UA3753	210.04	72.0194	0.465867	14.8053	2.79422	0.205476	0.486959	2.28527	4.7724	1.99029	0.225787	100	6.7044	NA	0	0
UA3753-45	UA3753	210.04	72.1757	0.500936	15.0123	2.28053	0.0791264	0.486269	1.50873	5.00726	2.90316	0.0592885	100	7.2838	NA	0	0
UA3753-9	UA3753	210.04	72.3651	0.529217	14.5123	2.80433	0.152383	0.512321	2.26865	4.45741	2.20509	0.249563	100	8.5815	NA	0	0
UA3753-40	UA3753	210.04	72.5244	0.528018	14.3702	2.29041	0.120199	0.343337	1.18695	5.38578	3.07815	0.22291	100	5.6355	NA	7.99196e-07	0
UA3753-46	UA3753	210.04	72.8184	0.449632	14.3373	2.22435	0.0645668	0.354875	1.33429	5.02768	3.35988	0.0373683	100	5.6527	NA	0	0
UA3753-35	UA3753	210.04	74.0469	0.316724	13.4157	2.05265	0.0966104	0.169235	1.04328	4.19692	4.45917	0.261956	100	4.0445	NA	0.00800193	0
UA3753-1	UA3753	210.04	74.2626	0.271881	14.7408	1.40614	0.0236951	0.410732	1.75199	4.20157	2.89192	0.0498933	100	6.6769	NA	0	0
UA3753-48	UA3753	210.04	74.277	0.33269	13.4163	2.04612	0.0455575	0.181273	1.02058	4.01945	4.50021	0.207747	100	5.7675	NA	0.00500579	0
UA3753-4	UA3753	210.04	74.3402	0.314703	13.3008	1.99664	0.057878	0.190653	1.05992	4.02673	4.51757	0.251621	100	6.9854	NA	0.00700644	0
UA3753-28	UA3753	210.04	74.4203	0.340058	13.4708	1.88337	0.0947502	0.162356	0.996681	4.1564	4.3029	0.22254	100	6.5321	NA	0.00305457	0
UA3753-41	UA3753	210.04	74.4996	0.30205	13.5513	2.01974	0.0343675	0.198751	1.02058	3.95812	4.24227	0.223623	100	7.3368	NA	0.00256148	0
UA3753-47	UA3753	210.04	74.8012	0.330899	13.3012	2.01446	0.016469	0.227681	1.03269	3.92982	4.15278	0.248787	100	7.4808	NA	0.0348489	0
UA3753-8	UA3753	210.04	76.427	0.245896	12.9268	1.56417	0.00653269	0.213768	1.27693	3.79481	3.23164	0.403678	100	15.3794	NA	0.1472	0
UA3753-37	UA3753	210.04	76.6641	0.0619557	13.5214	0.788381	0.17479	0.0766341	0.904949	4.07662	3.65061	0.103952	100	7.9665	NA	0	0
UA3753-23	UA3753	210.04	76.7583	0.0486537	13.6003	0.761723	0.159575	0.0641724	0.864867	3.90847	3.74832	0.11058	100	7.9495	NA	0	0
UA3753-42	UA3753	210.04	76.9168	0.0857719	13.2485	0.820277	0.147049	0.0867043	0.940372	4.01713	3.65734	0.103527	100	7.5455	NA	0	0
UA3753-17	UA3753	210.04	77.0006	0.0261693	13.2523	0.782432	0.170221	0.065297	0.904012	3.55543	4.13179	0.144386	100	8.0677	NA	1.12999e-06	0
UA3753-3	UA3753	210.04	77.0198	0.101503	13.4154	0.815561	0.1653	0.0765187	0.892526	3.80234	3.6142	0.124977	100	7.9545	NA	0	0
UA3753-14	UA3753	210.04	77.069	0.0579729	13.4251	0.736687	0.169682	0.0747457	0.886363	3.66779	3.84039	0.0933814	100	7.8328	NA	0	0
UA3753-24	UA3753	210.04	77.077	0.0932723	13.1997	0.808759	0.192594	0.0705041	0.880975	4.02197	3.5653	0.116198	100	7.8891	NA	0.001	0
UA3753-29	UA3753	210.04	77.0809	0.0949521	13.2837	0.775362	0.148781	0.0906563	0.926255	3.76352	3.7442	0.118284	100	7.7472	NA	0	0
UA3753-19	UA3753	210.04	77.1279	0.0865732	13.1738	0.828881	0.164144	0.0708468	0.864409	4.00457	3.5663	0.145429	100	7.1814	NA	0	0
UA3753-33	UA3753	210.04	77.1298	0.0653538	13.1144	0.747785	0.152622	0.0886162	0.879411	3.9168	3.82104	0.108803	100	7.3397	NA	0	0
UA3753-44	UA3753	210.04	77.1592	0.0420202	13.2237	0.770457	0.150342	0.0913097	0.859225	4.00266	3.61201	0.115048	100	7.7086	NA	0	0
UA3753-32	UA3753	210.04	77.1645	0.102474	13.0588	0.760459	0.156675	0.0465848	0.867123	3.76881	3.96205	0.145361	100	7.0898	NA	2.02023e-06	0
UA3753-15	UA3753	210.04	77.2796	0.0194787	13.0769	0.735479	0.123519	0.0640928	0.851164	3.96371	3.82476	0.0791791	100	6.9755	NA	0	0
UA3753-6	UA3753	210.04	77.2935	0.0814891	13.3268	0.869235	0.13346	0.068562	0.828242	3.8094	3.49797	0.118034	100	7.7521	NA	0.002	0
UA3753-12	UA3753	210.04	77.5453	0.0465199	12.9721	0.78607	0.193558	0.0770493	0.903526	3.65092	3.74479	0.103445	100	7.7707	NA	2.81299e-07	0
UA3753-2	UA3753	210.04	77.9001	0.219894	12.7006	1.23579	0.0426269	0.230569	1.11275	4.37457	2.09672	0.111525	100	5.8974	NA	0	0
UA3753-22	UA3753	210.04	77.9726	0.182374	12.7516	1.1536	0.0854129	0.18697	1.05112	4.16417	2.30124	0.194792	100	7.528	NA	0	0
UA3753-18	UA3753	210.04	78.0356	0.195634	12.6403	1.23732	0.0617143	0.166745	1.10304	3.98599	2.44687	0.163932	100	8.0067	NA	0	0
UA3753-25	UA3753	210.04	98.6052	0.0532411	0.237787	0.3465	0.0117085	0.0171013	0.0734246	0.442308	0.0947364	0.152445	100	16.6846	NA	0	0
OldCrow_039	OldCro	NA	75.2005	0.286155	13.0789	1.66107	0.0422442	0.279303	1.47017	3.89607	3.88305	0.261724	100	4.8531	NA	0.996583	1
OldCrow_040	OldCro	NA	75.2973	0.325184	12.8483	1.7492	0.0673191	0.311109	1.48258	3.75565	3.93779	0.291378	100	5.3047	NA	0.998057	1
OldCrow_041	OldCro	NA	75.1637	0.283943	13.2067	1.7039	0.0485037	0.268112	1.54496	3.859	3.71831	0.261951	100	5.7123	NA	0.998372	1
OldCrow_042	OldCro	NA	75.0497	0.293085	13.1589	1.72952	0.0982023	0.277889	1.4482	3.7577	3.95398	0.300626	100	5.4727	NA	0.994584	1
OldCrow_043	OldCro	NA	75.5566	0.337285	13.0617	1.73032	0.0674504	0.221195	1.4073	3.70563	3.72623	0.240552	100	5.5069	NA	0.984666	1
OldCrow_044	OldCro	NA	75.4296	0.243009	13.1331	1.63279	0.0460956	0.266077	1.46277	3.72868	3.86895	0.243871	100	6.8068	NA	0.996303	1
OldCrow_045	OldCro	NA	74.8412	0.301297	13.3414	1.81379	0.0731911	0.274901	1.53438	3.81895	3.8269	0.224799	100	7.2674	NA	0.86554	0
OldCrow_046	OldCro	NA	75.3807	0.291905	13.05	1.76251	0.0576765	0.288641	1.49725	3.55752	3.91841	0.252476	100	6.3223	NA	0.997479	1
OldCrow_047	OldCro	NA	75.0811	0.335351	13.2827	1.70868	0.0279361	0.275273	1.49472	3.81292	3.7528	0.295104	100	5.7779	NA	0.99868	1
OldCrow_048	OldCro	NA	75.3274	0.316903	12.9687	1.8108	0	0.280409	1.43905	3.77395	3.88355	0.257274	100	5.232	NA	0.99846	1
OldCrow_049	OldCro	NA	75.5455	0.323932	12.9919	1.67913	0.0411582	0.271102	1.44204	3.71682	3.78114	0.267569	100	5.749	NA	0.999666	1
OldCrow_050	OldCro	NA	75.457	0.275492	12.9931	1.73923	0.0798244	0.271368	1.52105	3.69417	3.74325	0.291217	100	6.2993	NA	0.999804	1
OldCrow-1	OldCro	NA	75.5557	0.308229	12.704	1.70201	0.0586695	0.268799	1.43639	3.84345	3.92167	0.259668	100	2.72284	NA	0.990399	1
OldCrow-1	OldCro	NA	75.3844	0.363148	12.8087	1.73774	0.0836029	0.271712	1.46411	3.82346	3.8446	0.282222	100	4.45433	NA	0.999165	1
OldCrow-1	OldCro	NA	75.5632	0.324815	13.0174	1.65511	0.0748928	0.24211	1.41789	3.78816	3.72053	0.252947	100	4.75315	NA	0.996723	1
OldCrow-1	OldCro	NA	75.2233	0.295766	13.0478	1.72948	0.0354398	0.244376	1.46756	4.10328	3.59802	0.329167	100	3.42776	NA	0.95103	1
OldCrow-1	OldCro	NA	75.2895	0.295635	12.9493	1.78517	0.0639293	0.257324	1.53367	3.81816	3.81478	0.248748	100	4.08158	NA	0.999548	1
OldCrow-1	OldCro	NA	75.2204	0.329132	13.0186	1.72793	0.0544387	0.331311	1.50445	4.04502	3.53961	0.295727	100	0.45683	NA	0.982511	1
OldCrow-1	OldCro	NA	75.7416	0.307777	13.0227	1.73615	0.065173	0.281798	1.51251	3.23938	3.87936	0.275639	100	3.71782	NA	0.990175	1
OldCrow-1	OldCro	NA	75.3558	0.259529	12.905	1.64042	0.0857525	0.257434	1.44281	3.9273	3.88965	0.305069	100	3.54339	NA	0.997906	1
OldCrow-1	OldCro	NA	75.3736	0.300318	13.02	1.79418	0.0308704	0.283099	1.40862	3.85574	3.73704	0.2538	100	2.98464	NA	0.999527	1
OldCrow-1	OldCro	NA	75.3171	0.361346	12.8822	1.70601	0.0598157	0.270587	1.43366	3.85451	3.89242	0.287225	100	4.62207	NA	0.998668	1
UA3833-39	UA3833	145.25	69.0648	0.602091	15.1612	4.41337	0.16977	0.575498	1.94396	5.32791	2.61764	0.15998	100	4.75635	147.66 ka	0	0
UA3833-42	UA3833	145.25	69.0831	0.610843	15.231	4.37674	0.178959	0.574773	1.95409	5.42102	2.44283	0.163393	100	4.68539	U1345D-4H-4 (38.35m CCSF-A)	0	0
UA3833-17	UA3833	145.25	69.4091	0.639295	15.1637	4.2559	0.176529	0.567495	1.99175	5.36775	2.30034	0.165487	100	2.39981	NA	0	0
UA3833-9	UA3833	145.25	69.5889	0.575201	15.2422	3.98232	0.176007	0.55774	1.8659	5.48175	2.42236	0.138922	100	4.58039	NA	0	0
UA3833-6	UA3833	145.25	70.3533	0.646207	14.5365	4.1736	0.192143	0.504945	1.81206	5.02133	2.6439	0.149695	100	1.52517	NA	0	0
UA3833-7	UA3833	145.25	70.5089	0.439152	14.9562	4.0489	0.150045	0.394837	1.71663	5.12537	2.49676	0.210833	100	5.14912	NA	0	0
UA3833-35	UA3833	145.25	72.1886	0.315468	14.1003	3.45599	0.147187	0.138706	1.14669	5.52147	2.83327	0.196657	100	5.23657	NA	0	0
UA3833-38	UA3833	145.25	72.3011	0.478348	14.2634	3.25931	0.0790047	0.392172	1.91388	4.98003	2.18164	0.195186	100	4.54872	NA	0	0
UA3833-31	UA3833	145.25	73.4341	0.523799	14.3347	2.4835	0.16291	0.431941	2.11152	4.11703	2.21605	0.238099	100	8.11247	NA	3.16158e-06	0
UA3833-48	UA3833	145.25	74.2424	0.231999	14.8005	1.16134	0.062977	0.275819	1.61833	4.0289	3.56554	0.0157829	100	6.11335	NA	0.001	0
UA3833-20	UA3833	145.25	74.6566	0.329903	13.2439	2.01622	0.0767453	0.183751	0.9691	3.95666	4.3503	0.280101	100	5.1017	NA	0.0181045	0
UA3833-41	UA3833	145.25	74.9581	0.306379	13.2016	1.77557	0.0689583	0.271139	1.49517	3.91237	3.80593	0.264646	100	5.30359	NA	0.998165	1
UA3833-36	UA3833	145.25	74.9889	0.255565	13.0854	1.68472	0.085886	0.279178	1.49967	3.96357	3.93458	0.287399	100	5.3012	NA	0.98301	1
UA3833-37	UA3833	145.25	75.0975	0.353925	13.0869	1.76369	0.0194913	0.260318	1.43789	3.95783	3.81314	0.270301	100	4.84985	NA	0.997267	1
UA3833-50	UA3833	145.25	75.1014	0.303869	13.2263	1.7926	0.075265	0.2526	1.40264	3.81467	3.81073	0.283962	100	6.60468	NA	0.998405	1
UA3833-8	UA3833	145.25	75.1344	0.351447	13.3185	1.7281	0.00745597	0.256347	1.44831	3.71706	3.83376	0.264143	100	4.21101	NA	0.992814	1
UA3833-33	UA3833	145.25	75.1487	0.288946	13.0824	1.81952	0.07517	0.275613	1.49398	3.74733	3.86638	0.260826	100	5.09112	NA	0.998939	1
UA3833-28	UA3833	145.25	75.185	0.311209	12.8995	1.89728	0.0622972	0.257127	1.48561	3.91194	3.77346	0.279606	100	3.74682	NA	0.997449	1
UA3833-15	UA3833	145.25	75.215	0.313429	12.9613	1.78202	0.0565512	0.28855	1.50607	3.76084	3.87136	0.316103	100	3.94727	NA	0.999107	1
UA3833-4	UA3833	145.25	75.3038	0.326904	12.9973	1.73924	0.144358	0.265653	1.44928	3.80236	3.76267	0.269214	100	4.09796	NA	0.999187	1
UA3833-13	UA3833	145.25	75.3183	0.338625	13.1216	1.80988	0.0877987	0.300625	1.44417	3.54429	3.84014	0.251367	100	3.97006	NA	0.997704	1
UA3833-44	UA3833	145.25	75.3281	0.330055	13.0893	1.72991	0.0718938	0.229758	1.4199	3.99239	3.58648	0.287113	100	5.85971	NA	0.986897	1
UA3833-22	UA3833	145.25	75.3513	0.314369	13.0377	1.79211	0.0314724	0.231601	1.45874	3.77061	3.81253	0.257723	100	4.68144	NA	0.999462	1
UA3833-47	UA3833	145.25	75.3611	0.267854	13.0777	1.82343	0.00757133	0.296423	1.50109	3.70126	3.76181	0.260599	100	7.05734	NA	0.999634	1
UA3833-43	UA3833	145.25	75.3646	0.284865	13.0293	1.63951	0.0435655	0.33691	1.49154	3.78918	3.79244	0.294603	100	5.99675	NA	0.999651	1
UA3833-49	UA3833	145.25	75.4072	0.331428	13.003	1.72914	0.0993786	0.261358	1.50016	3.79879	3.6969	0.222978	100	5.18986	NA	0.999467	1
UA3833-21	UA3833	145.25	75.4352	0.258552	13.0211	1.73358	0.0740959	0.242181	1.43926	3.78115	3.82777	0.241505	100	3.583	NA	0.999337	1
UA3833-27	UA3833	145.25	75.4388	0.283475	12.783	1.93017	0.0437003	0.269227	1.48909	3.67338	3.88595	0.262531	100	5.22713	NA	0.983336	1
UA3833-46	UA3833	145.25	75.4668	0.331649	13.0772	1.70055	0.0331107	0.289423	1.41859	3.7643	3.71788	0.259058	100	6.44105	NA	0.999642	1
UA3833-23	UA3833	145.25	75.4875	0.305939	13.0291	1.6804	0.0569366	0.270719	1.43204	3.73937	3.78626	0.273456	100	4.63595	NA	0.999654	1
UA3833-32	UA3833	145.25	75.5455	0.246115	12.9777	1.70847	0.0587026	0.278695	1.40212	3.57826	3.98815	0.27923	100	5.18313	NA	0.983777	1
UA3833-3	UA3833	145.25	75.5484	0.318329	13.1513	1.73135	0.0407482	0.249514	1.43816	3.65155	3.67329	0.254963	100	5.42166	NA	0.999702	1
UA3833-10	UA3833	145.25	75.5576	0.313588	12.902	1.79569	0.0583556	0.26438	1.41117	3.80292	3.69246	0.260687	100	4.51473	NA	0.99977	1
UA3833-51	UA3833	145.25	75.5716	0.317138	13.1334	1.62993	0.0585279	0.295359	1.46943	3.58305	3.70492	0.305719	100	6.30623	NA	0.999725	1
UA3833-45	UA3833	145.25	75.6114	0.257375	13.2241	1.77616	0.0597087	0.262066	1.40475	3.48726	3.71639	0.259229	100	5.63015	NA	0.999378	1
UA3833-24	UA3833	145.25	75.6339	0.308199	12.9539	1.63465	0.094361	0.266867	1.3998	3.77957	3.70749	0.285732	100	1.57056	NA	0.999811	1
UA3833-11	UA3833	145.25	75.6371	0.291408	13.1619	1.68168	0.0365469	0.272776	1.43822	3.59018	3.6759	0.276763	100	6.13707	NA	0.999655	1
UA3833-29	UA3833	145.25	75.6578	0.260915	12.9354	1.85178	0.0222441	0.249383	1.44218	3.75164	3.62767	0.259658	100	3.70052	NA	0.999758	1
UA3833-25	UA3833	145.25	75.658	0.290175	12.7631	1.69164	0.07286	0.289423	1.47124	3.87536	3.69267	0.252446	100	3.91164	NA	0.998596	1
UA3833-14	UA3833	145.25	75.6787	0.376051	12.9664	1.77023	0.0546487	0.270596	1.43606	3.56858	3.66596	0.274761	100	5.83313	NA	0.999662	1
UA3833-1	UA3833	145.25	75.7234	0.245605	12.963	1.68005	0.0526554	0.261862	1.46461	3.69697	3.67483	0.306099	100	5.16262	NA	0.999834	1
UA3833-16	UA3833	145.25	75.7285	0.309381	13.1677	1.73815	0.0869151	0.241317	1.47956	3.27706	3.74924	0.286977	100	4.60465	NA	0.995041	1
UA3833-5	UA3833	145.25	75.7666	0.270287	13.0591	1.74584	0.0466305	0.254175	1.41021	3.45696	3.7663	0.289136	100	5.07496	NA	0.998395	1
UA3833-19	UA3833	145.25	74.9975	0.303225	13.1175	1.71753	0	0.217063	1.14563	3.92234	4.36604	0.275405	100	4.62813	NA	0.0134608	0
UA3833-18	UA3833	145.25	75.0799	0.246795	13.0486	1.81465	0.0371903	0.238484	1.09101	3.66318	4.5477	0.300207	100	3.94545	NA	0.00807264	0
UA3833-30	UA3833	145.25	76.0926	0.0440579	13.9252	0.542898	0.140794	0.113777	0.998739	3.50282	4.57243	0.0859983	100	7.58069	32	0	0
UA3833-2	UA3833	145.25	76.1546	0	14.1578	0.517048	0.160322	0.0645339	0.991864	4.13704	3.75084	0.08528	100	5.51006	NA	0	0
UA3833-34	UA3833	145.25	76.2771	0.226954	12.8481	1.30545	0.0150039	0.191185	1.02192	3.42798	4.62	0.0856288	100	4.81819	NA	0	0
UA3833-26	UA3833	145.25	76.6311	0.240705	12.4886	1.30429	0.0391398	0.167686	1.06737	3.36688	4.63127	0.0813709	100	5.02499	NA	0	0
UA3833-12	UA3833	145.25	77.2081	0.069028	13.3104	0.80547	0.106232	0.0817951	0.880495	3.7899	3.64689	0.131309	100	5.70343	NA	0.002	0
UA3833-40	UA3833	145.25	77.2121	0.0838191	13.1872	0.794155	0.16698	0.0770468	0.864565	3.85003	3.67929	0.109577	100	7.03317	NA	0	0
UA3834-9	UA3834	147.77	67.6642	0.643766	15.4984	4.84649	0.177093	0.687283	2.42355	5.65054	2.28329	0.16187	100	5.27559	150.04 ka	0	0
UA3834-4	UA3834	147.77	69.3704	0.627619	14.9031	4.239	0.17416	0.58156	2.07159	5.46306	2.41868	0.194685	100	5.9799	U1345A-5H-4 (38.87m CCSF-A)	0	0
UA3834-1	UA3834	147.77	69.6822	0.487497	14.9926	3.94311	0.210098	0.442081	1.92523	5.66693	2.50388	0.188884	100	4.69006	NA	0	0
UA3834-14	UA3834	147.77	71.111	0.459267	14.5914	2.80624	0.0807365	0.345785	1.50355	4.47747	4.42483	0.25791	100	6.24063	NA	0	0
UA3834-10	UA3834	147.77	71.9152	0.422997	14.4038	2.91672	0.101689	0.372429	1.71151	4.52133	3.44287	0.247182	100	6.23862	NA	0.00200539	0
UA3834-16	UA3834	147.77	74.3154	0.25017	13.3061	1.91156	0.0838828	0.182006	1.08515	4.18555	4.4973	0.236294	100	6.25249	NA	0.01401	0
UA3834-15	UA3834	147.77	74.4965	0.342354	13.3436	1.92135	0.0549364	0.207131	1.04758	4.02667	4.36458	0.252126	100	5.42702	NA	0.013102	0
UA3834-23	UA3834	147.77	75.1037	0.372825	13.1662	1.69643	0.0461976	0.286624	1.49445	3.95065	3.68935	0.249927	100	5.71594	NA	0.999003	1
UA3834-22	UA3834	147.77	75.1483	0.333235	13.3502	1.74897	0.0755134	0.246834	1.50983	3.69573	3.68829	0.262388	100	6.9794	NA	0.989487	1
UA3834-13	UA3834	147.77	75.2147	0.353307	13.1488	1.67342	0.0761218	0.259892	1.65418	3.56278	3.81539	0.311817	100	5.8679	NA	0.991295	1
UA3834-21	UA3834	147.77	75.295	0.300123	13.2074	1.67547	0.0709653	0.24522	1.49556	3.63761	3.894	0.230454	100	6.94885	NA	0.974608	1
UA3834-2	UA3834	147.77	75.3101	0.316183	12.936	1.64821	0.0696591	0.286923	1.57128	3.82438	3.79165	0.31739	100	5.18403	NA	0.999755	1
UA3834-20	UA3834	147.77	75.3493	0.226244	12.986	1.68538	0.071406	0.308204	1.62251	3.75905	3.77793	0.27627	100	5.54712	NA	0.999793	1
UA3834-11	UA3834	147.77	75.3801	0.292921	13.004	1.72938	0.0654129	0.271875	1.45259	3.81649	3.78389	0.262667	100	5.48804	NA	0.999633	1
UA3834-8	UA3834	147.77	75.4267	0.28081	13.1285	1.64789	0.0788893	0.277964	1.45389	3.73985	3.72446	0.311395	100	7.38411	NA	0.999719	1
UA3834-3	UA3834	147.77	75.4591	0.336351	13.0744	1.65171	0.101979	0.260112	1.51103	3.69589	3.68336	0.291983	100	6.28001	NA	0.999817	1
UA3834-5	UA3834	147.77	75.4651	0.296511	13.0883	1.57177	0.0734488	0.26056	1.45461	3.90818	3.68602	0.252454	100	6.25309	NA	0.992241	1
UA3834-12	UA3834	147.77	75.4738	0.216678	13.1168	1.83026	0.0777429	0.274399	1.49368	3.72002	3.58076	0.278904	100	6.02868	NA	0.999659	1
UA3834-6	UA3834	147.77	75.4923	0.288089	13.1596	1.71068	0.0434527	0.254465	1.5441	3.59284	3.70688	0.2681	100	6.21516	NA	0.999735	1
UA3834-17	UA3834	147.77	75.5127	0.331436	13.1152	1.62645	0.113415	0.248132	1.51533	3.43468	3.90011	0.26146	100	7.05528	NA	0.968944	1
UA3834-24	UA3834	147.77	75.5314	0.262666	13.0586	1.75296	0.088095	0.305429	1.47689	3.66971	3.6515	0.261802	100	4.32485	NA	0.999758	1
UA3834-7	UA3834	147.77	75.5792	0.268175	13.1261	1.67762	0.0250575	0.258505	1.53624	3.66974	3.68329	0.22721	100	4.6674	NA	0.999359	1
UA3834-19	UA3834	147.77	75.6082	0.330825	12.879	1.72028	0.0207496	0.259411	1.53376	3.69196	3.7056	0.323216	100	5.17892	NA	0.999818	1
UA3834-25	UA3834	147.77	75.6721	0.279882	12.9791	1.7184	0.0419033	0.274825	1.48859	3.59693	3.73387	0.276939	100	6.11721	NA	0.999756	1
UA3834-18	UA3834	147.77	75.716	0.324608	13.0151	1.62491	0.043593	0.288748	1.56587	3.52385	3.66189	0.304102	100	6.49423	NA	0.999737	1
OldCrow-2	OldCro	NA	75.2669	0.249419	12.9188	1.70869	0.0755934	0.324172	1.49012	3.80772	3.94977	0.269729	100	5.22849	NA	0.998336	1
OldCrow-2	OldCro	NA	75.8295	0.292827	12.7728	1.65276	0.0302475	0.279154	1.44075	3.71612	3.76823	0.281061	100	7.08985	NA	0.99773	1
OldCrow-2	OldCro	NA	75.5373	0.29605	13.1237	1.70925	0.0389418	0.279934	1.45554	3.65678	3.69128	0.272745	100	6.19589	NA	0.999738	1
OldCrow-2	OldCro	NA	75.408	0.230913	12.9951	1.83031	0.0607499	0.288032	1.45134	3.81407	3.72645	0.251982	100	5.19653	NA	0.999691	1
OldCrow-2	OldCro	NA	75.1504	0.34192	13.1582	1.71943	0.0700657	0.270975	1.46255	3.82048	3.83344	0.222894	100	3.75179	NA	0.99428	1
OldCrow-2	OldCro	NA	75.652	0.260527	12.9641	1.7014	0.00148815	0.304799	1.54949	3.64059	3.71132	0.276642	100	5.58761	NA	0.999767	1
OldCrow-2	OldCro	NA	75.5925	0.305144	12.9412	1.75221	0.0344469	0.278784	1.45466	3.76885	3.65386	0.281792	100	6.15131	NA	0.999826	1
OldCrow-2	OldCro	NA	75.4325	0.302276	12.9221	1.6511	0.0546445	0.25476	1.4772	3.92955	3.77017	0.265566	100	4.80096	NA	0.999551	1
UA3834-35	UA3834	147.77	65.8179	0.903503	15.3914	5.63058	0.180278	1.13146	3.37687	4.96637	2.4825	0.153761	100	3.77654	150.04 ka	0	0
UA3834-48	UA3834	147.77	70.5137	0.553027	14.4026	3.4259	0.101229	0.504228	1.99125	4.31476	4.04277	0.194357	100	2.9039	NA	1.13327e-05	0
UA3834-37	UA3834	147.77	70.9698	0.420382	14.6677	3.79162	0.155611	0.409168	1.7406	5.12066	2.56731	0.202887	100	6.22379	NA	0	0
UA3834-33	UA3834	147.77	71.0362	0.485465	14.8036	3.6652	0.115421	0.489588	1.83065	4.7377	2.71028	0.162521	100	6.39454	NA	0	0
UA3834-51	UA3834	147.77	71.1912	0.512706	14.5932	3.2926	0.165727	0.364821	1.45748	5.51074	2.77457	0.176827	100	4.21475	NA	0	0
UA3834-47	UA3834	147.77	74.5671	0.337255	13.1378	1.93202	0.0744533	0.192252	1.05427	4.17129	4.35062	0.236374	100	5.49242	NA	0.0130963	0
UA3834-42	UA3834	147.77	75.1975	0.289661	12.9976	1.69672	0.0711234	0.293576	1.509	3.88204	3.84797	0.277651	100	4.98761	NA	0.99931	1
UA3834-45	UA3834	147.77	75.2157	0.271553	13.0503	1.73305	0.0385648	0.280247	1.59764	3.74681	3.82148	0.315886	100	5.07933	NA	0.999671	1
UA3834-34	UA3834	147.77	75.3127	0.2368	13.1128	1.6427	0.0671918	0.24569	1.5398	3.72437	3.91357	0.263987	100	5.73553	NA	0.996871	1
UA3834-27	UA3834	147.77	75.3615	0.30256	12.9274	1.75066	0.100798	0.271408	1.52423	3.61645	3.92682	0.281752	100	6.52386	NA	0.997421	1
UA3834-50	UA3834	147.77	75.4007	0.28343	13.2065	1.74199	0.0715568	0.257912	1.4779	3.60844	3.72645	0.290744	100	5.52677	NA	0.999669	1
UA3834-39	UA3834	147.77	75.4592	0.257922	13.0568	1.74691	0.0580463	0.270445	1.54016	3.56479	3.8289	0.280032	100	5.42031	NA	0.999487	1
UA3834-41	UA3834	147.77	75.4795	0.313937	12.9554	1.56936	0.0608596	0.316266	1.58631	3.67989	3.80322	0.303826	100	5.14565	NA	0.997791	1
UA3834-36	UA3834	147.77	75.5972	0.260375	13.0626	1.74163	0.0325956	0.258498	1.5383	3.637	3.62567	0.317889	100	4.98425	NA	0.999763	1
UA3834-32	UA3834	147.77	75.5987	0.302359	13.1155	1.69843	0.0432212	0.24698	1.5751	3.64193	3.5727	0.264775	100	5.56254	NA	0.999706	1
UA3834-46	UA3834	147.77	75.5989	0.307748	12.9123	1.67835	0.0689851	0.291724	1.57632	3.53839	3.82902	0.25623	100	6.08985	NA	0.999052	1
UA3834-30	UA3834	147.77	75.6721	0.308185	13.1158	1.67646	0.0165736	0.24611	1.54822	3.51093	3.6957	0.271015	100	6.59864	NA	0.999631	1
UA3834-28	UA3834	147.77	75.6934	0.258166	13.075	1.81358	0.040761	0.231667	1.50935	3.39381	3.77039	0.276072	100	6.80802	30	0.997143	1
UA3834-40	UA3834	147.77	77.0091	0.352292	13.0281	1.74326	0.0462193	0.275733	1.57514	2.11241	3.6612	0.253798	100	5.53512	NA	0.33953	0
UA3834-26	UA3834	147.77	77.088	0.227578	12.7203	1.37633	0.0343368	0.371374	1.6762	3.67383	2.66376	0.217325	100	5.71923	NA	1.96807e-06	0
UA3834-38	UA3834	147.77	77.0913	0.156896	13.096	1.1908	0.0186739	0.315586	1.77416	3.57572	2.58441	0.253627	100	9.4352	NA	0.00600561	0
UA3834-49	UA3834	147.77	77.3675	0.0540227	12.849	0.81946	0.155896	0.0985498	0.933688	4.12311	3.50689	0.118774	100	5.93584	NA	0	0
UA3834-43	UA3834	147.77	77.5255	0.321302	13.0127	1.81826	0.033568	0.221087	1.56587	1.48475	3.77762	0.309177	100	7.67087	NA	0.288681	0
UA3834-29	UA3834	147.77	78.5338	0.156292	12.3924	1.04392	0.0545406	0.161375	1.08466	4.00299	2.43788	0.170593	100	6.99035	NA	0	0
UA3834-44	UA3834	147.77	79.0748	0.210272	12.7573	1.36184	0.0880581	0.31835	1.7654	1.55476	2.72706	0.183424	100	7.10787	NA	0	0
UA3835-44	UA3835	153.33	60.0617	1.3863	15.9316	7.94001	0.218907	2.47377	5.74884	4.51752	1.62893	0.119323	100	3.9325	155.32 ka	0	0
UA3835-50	UA3835	153.33	63.499	0.993777	15.8496	6.72407	0.199608	1.72304	4.27504	4.49615	2.11613	0.159567	100	3.52961	U1345A-5H-4 (40.02m CCSF-A)	0	0
UA3835-41	UA3835	153.33	65.5768	0.918679	15.6657	5.71599	0.182496	1.2271	3.49234	4.62658	2.46562	0.16622	100	2.79086	NA	0	0
UA3835-14	UA3835	153.33	66.0904	0.735476	15.7441	5.38093	0.146151	1.09058	3.15234	5.14926	2.36175	0.192437	100	3.26455	NA	0	0
UA3835-12	UA3835	153.33	67.3532	0.610955	15.5865	4.94863	0.215012	0.69713	2.45061	5.69717	2.29196	0.192215	100	2.91467	NA	0	0
UA3835-7	UA3835	153.33	69.06	0.541789	15.1989	4.25474	0.213479	0.498648	1.9533	5.70624	2.43328	0.180351	100	2.75045	NA	0	0
UA3835-20	UA3835	153.33	69.1459	0.547723	14.5438	4.94231	0.19892	0.438419	2.26676	5.19001	2.57328	0.197521	100	2.89849	NA	0	0
UA3835-26	UA3835	153.33	69.1498	0.518022	15.198	4.24192	0.201284	0.525004	2.07326	5.54634	2.42204	0.16047	100	4.00376	NA	0	0
UA3835-32	UA3835	153.33	69.1597	0.630857	14.9833	4.19076	0.146846	0.476299	2.12866	5.61295	2.49853	0.222334	100	3.68822	NA	0	0
UA3835-17	UA3835	153.33	69.6185	0.599388	15.3601	4.21054	0.18388	0.517838	1.99289	5.01473	2.4001	0.131814	100	6.25145	NA	0	0
UA3835-3	UA3835	153.33	69.7965	0.534033	15.1441	4.20803	0.188341	0.54378	1.82654	5.08045	2.55886	0.154175	100	5.37596	NA	0	0
UA3835-38	UA3835	153.33	70.1933	0.475727	15.017	3.79131	0.0918908	0.369882	1.76944	5.23512	2.89278	0.21112	100	5.47916	NA	1.82371e-07	0
UA3835-19	UA3835	153.33	70.8377	0.460255	14.755	3.69906	0.23107	0.435807	1.62977	5.09107	2.6845	0.227019	100	5.9565	NA	0.001	0
UA3835-30	UA3835	153.33	71.0933	0.417153	15.0605	2.6933	0.150597	0.505519	2.46584	4.41387	3.00356	0.25363	100	5.881	NA	1.02103e-06	0
UA3835-6	UA3835	153.33	71.7572	0.407978	14.5399	3.87024	0.13314	0.185841	1.49204	4.94948	2.49971	0.212272	100	7.1908	NA	0	0
UA3835-25	UA3835	153.33	71.8472	0.317054	14.4761	3.83802	0.187521	0.185455	1.39042	4.96363	2.61822	0.227829	100	8.06807	NA	0.001	0
UA3835-11	UA3835	153.33	74.8969	0.281509	13.1615	1.92498	0.0777239	0.201437	0.995909	3.97119	4.31627	0.222824	100	5.81276	NA	0.0171554	0
UA3835-35	UA3835	153.33	75.1214	0.286697	13.5157	1.88759	0.0965762	0.407353	2.02043	3.8641	2.57881	0.285957	100	5.38148	NA	0.0145326	0
UA3835-47	UA3835	153.33	75.3323	0.306515	13.2118	1.63588	0.0654788	0.310454	1.43975	3.75133	3.7187	0.293984	100	5.53735	NA	0.999527	1
UA3835-31	UA3835	153.33	75.349	0.269188	12.775	1.70715	0.0547062	0.19166	1.07249	4.00681	4.37223	0.260581	100	4.9175	NA	0.0546106	0
UA3835-48	UA3835	153.33	75.3751	0.300918	13.2365	1.71802	0.0536794	0.290101	1.45904	3.68787	3.66627	0.274371	100	5.72726	NA	0.999663	1
UA3835-36	UA3835	153.33	75.3753	0.294288	13.106	1.61257	0.00737161	0.262869	1.43742	3.80696	3.88468	0.274423	100	4.63411	NA	0.996234	1
UA3835-46	UA3835	153.33	75.4126	0.318065	13.2097	1.72915	0.0434217	0.283029	1.44186	3.61556	3.72203	0.290148	100	6.12293	NA	0.999583	1
UA3835-5	UA3835	153.33	75.4588	0.265275	13.1643	1.74422	0.029967	0.245434	1.42859	3.62259	3.80846	0.30015	100	5.99662	NA	0.999187	1
UA3835-37	UA3835	153.33	75.4984	0.272886	13.1263	1.8049	0.0538858	0.27598	1.45298	3.50651	3.84646	0.208728	100	6.08837	NA	0.952007	1
UA3835-39	UA3835	153.33	75.5053	0.34065	12.9875	1.68507	0.0556328	0.240624	1.43192	3.94008	3.61997	0.249419	100	6.50833	NA	0.998533	1
UA3835-21	UA3835	153.33	75.5326	0.299028	12.9201	1.81583	0.0619394	0.25292	1.42277	3.51711	3.93801	0.309504	100	6.91388	NA	0.995197	1
UA3835-16	UA3835	153.33	75.5425	0.34903	12.9966	1.71698	0.0487048	0.281529	1.50087	3.42623	3.90428	0.301186	100	4.64809	NA	0.996754	1
UA3835-42	UA3835	153.33	75.5558	0.297741	13.0061	1.77519	0.0641104	0.257901	1.45778	3.63304	3.73385	0.282138	100	5.72676	NA	0.99976	1
UA3835-23	UA3835	153.33	75.6157	0.282874	13.121	1.63059	0.0391213	0.283767	1.38999	3.51576	3.93247	0.243725	100	6.53434	NA	0.991708	1
[truncated: 935 more rows]

## Sheet: G50491
Reyes, A.V., et al., 2023, Detrital glass in a Bering Sea sediment core yields a ca. 160 ka Marine Isotope Stage 6 age for Old Crow tephra: Geology, v. 51, https://doi.org/10.1130/G50491.1
